# Supplementary material for: In situ volcanic ash sampling and aerosol–gas analysis based on UAS technologies (AeroVolc)
Source: Copernicus journal article supplement (doi:10.5194/amt-18-2803-2025), 2025-07-01
Supplement: Supplementary file 1 [file amt-18-2803-2025-supplement.zip]

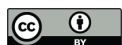

## *Supplement of*

# **In situ volcanic ash sampling and aerosol–gas analysis based on UAS technologies (AeroVolc)**

**Simon Thivet et al.**

*Correspondence to:* Simon Thivet ([simonthivet@unige.ch](mailto:simonthivet@unige.ch))

- [amt-18-2803-2025-supplement-title-page.pdf](#)
- [A2C3 ash sampling 23-07-2024 Etna MP4.mp4](#)
- [File S1.docx](#)
- [File S2.xlsx](#)
- [File S3.xlsx](#)
- [File S4.docx](#)
- [File S5.xlsx](#)
- [File S6.xlsx](#)
- [File S7.xlsx](#)
- [Supplementary material guide.docx](#)
- [UAV Flight 10-11-2023 Sakurajima.kmz](#)
- [UAV Flight 11-11-2023 Sakurajima.kmz](#)
- [UAV Flight 19-11-2023 Sakurajima.kmz](#)
- [UAV Flight 23-07-2024 Etna.kmz](#)

The copyright of individual parts of the supplement might differ from the article licence.
