# Supplementary material for: In situ volcanic ash sampling and aerosol–gas analysis based on UAS technologies (AeroVolc)
Source: Copernicus journal article supplement (doi:10.5194/amt-18-2803-2025), 2025-07-01
Supplement: Supplementary file 1 [file amt-18-2803-2025-supplement.zip]

## Sheet: OPC - 10-11-2023 - Sakurajima
Analysis time [s]	Counts per seconds [bins equivalent in µm]																									Raw data conversion into mass based on particle density of 2500 kg m-3 and spherical assumption [g]
	Bin0	Bin1	Bin2	Bin3	Bin4	Bin5	Bin6	Bin7	Bin8	Bin9	Bin10	Bin11	Bin12	Bin13	Bin14	Bin15	Bin16	Bin17	Bin18	Bin19	Bin20	Bin21	Bin22	Bin23		Bin0	Bin1	Bin2	Bin3	Bin4	Bin5	Bin6	Bin7	Bin8	Bin9	Bin10	Bin11	Bin12	Bin13	Bin14	Bin15	Bin16	Bin17	Bin18	Bin19	Bin20	Bin21	Bin22	Bin23
	0,35 - 0,46	0,46 - 0,66	0,66 - 1,00	1,00 - 1,30	1,30 - 1,70	1,70 - 2,30	2,30 - 3,00	3,00 - 4,00	4,00 - 5,20	5,20 - 6,50	6,50 - 8,00	8,00 - 10,00	10,00 - 12,00	12,00 - 14,00	14,00 - 16,00	16,00 - 18,00	18,00 - 20,00	20,00 - 22,00	22,00 - 25,00	25,00 - 28,00	28,00 - 31,00	31,00 - 34,00	34,00 - 37,00	37,00 - 40,00		0.35	0.46	0.66	1	1.3	1.7	2.3	3	4	5.2	6.5	8	10	12	14	16	18	20	22	25	28	31	34	37
0	95	15	3	2	3	1	0	0	0	0	0	0	0	0	0	0	0	0	0	0	0	0	0	0		5.32901e-12	1.91022e-12	1.12842e-12	2.61667e-12	8.62323e-12	6.42784e-12	0	0	0	0	0	0	0	0	0	0	0	0	0	0	0	0	0	0
1.398	92	10	7	1	4	1	0	0	0	0	0	0	0	0	0	0	0	0	0	0	0	0	0	0		5.16072e-12	1.27348e-12	2.63298e-12	1.30833e-12	1.14976e-11	6.42784e-12	0	0	0	0	0	0	0	0	0	0	0	0	0	0	0	0	0	0
2.796	96	12	8	0	0	1	0	0	0	0	0	0	0	0	0	0	0	0	0	0	0	0	0	0		5.3851e-12	1.52818e-12	3.00912e-12	0	0	6.42784e-12	0	0	0	0	0	0	0	0	0	0	0	0	0	0	0	0	0	0
4.194	83	5	9	2	1	0	0	0	0	0	0	0	0	0	0	0	0	0	0	0	0	0	0	0		4.65587e-12	6.3674e-13	3.38527e-12	2.61667e-12	2.87441e-12	0	0	0	0	0	0	0	0	0	0	0	0	0	0	0	0	0	0	0
5.592	106	16	3	0	1	1	0	0	0	0	0	0	0	0	0	0	0	0	0	0	0	0	0	0		5.94605e-12	2.03757e-12	1.12842e-12	0	2.87441e-12	6.42784e-12	0	0	0	0	0	0	0	0	0	0	0	0	0	0	0	0	0	0
6.99	113	23	12	0	2	3	1	0	0	0	0	0	0	0	0	0	0	0	0	0	0	0	0	0		6.33871e-12	2.929e-12	4.51369e-12	0	5.74882e-12	1.92835e-11	1.59185e-11	0	0	0	0	0	0	0	0	0	0	0	0	0	0	0	0	0
8.388	87	11	4	0	1	0	0	0	0	0	0	0	0	0	0	0	0	0	0	0	0	0	0	0		4.88025e-12	1.40083e-12	1.50456e-12	0	2.87441e-12	0	0	0	0	0	0	0	0	0	0	0	0	0	0	0	0	0	0	0
9.786	56	11	6	1	0	2	1	0	1	0	0	0	0	0	0	0	0	0	0	0	0	0	0	0		3.14131e-12	1.40083e-12	2.25684e-12	1.30833e-12	0	1.28557e-11	1.59185e-11	0	8.37333e-11	0	0	0	0	0	0	0	0	0	0	0	0	0	0	0
11.184	59	11	4	1	3	1	0	0	0	0	0	0	0	0	0	0	0	0	0	0	0	0	0	0		3.30959e-12	1.40083e-12	1.50456e-12	1.30833e-12	8.62323e-12	6.42784e-12	0	0	0	0	0	0	0	0	0	0	0	0	0	0	0	0	0	0
12.582	71	11	6	1	1	1	1	0	0	0	0	0	0	0	0	0	0	0	0	0	0	0	0	0		3.98273e-12	1.40083e-12	2.25684e-12	1.30833e-12	2.87441e-12	6.42784e-12	1.59185e-11	0	0	0	0	0	0	0	0	0	0	0	0	0	0	0	0	0
13.98	87	14	7	2	0	3	0	0	0	0	0	0	0	0	0	0	0	0	0	0	0	0	0	0		4.88025e-12	1.78287e-12	2.63298e-12	2.61667e-12	0	1.92835e-11	0	0	0	0	0	0	0	0	0	0	0	0	0	0	0	0	0	0
15.378	103	22	9	1	1	1	1	0	0	0	0	0	0	0	0	0	0	0	0	0	0	0	0	0		5.77776e-12	2.80165e-12	3.38527e-12	1.30833e-12	2.87441e-12	6.42784e-12	1.59185e-11	0	0	0	0	0	0	0	0	0	0	0	0	0	0	0	0	0
16.776	76	12	6	4	1	1	0	1	0	0	0	0	0	0	0	0	0	0	0	0	0	0	0	0		4.2632e-12	1.52818e-12	2.25684e-12	5.23333e-12	2.87441e-12	6.42784e-12	0	3.5325e-11	0	0	0	0	0	0	0	0	0	0	0	0	0	0	0	0
18.174	93	28	4	2	1	0	1	0	1	0	0	0	0	0	0	0	0	0	0	0	0	0	0	0		5.21682e-12	3.56574e-12	1.50456e-12	2.61667e-12	2.87441e-12	0	1.59185e-11	0	8.37333e-11	0	0	0	0	0	0	0	0	0	0	0	0	0	0	0
19.572	68	21	5	2	0	1	0	0	0	0	0	0	0	0	0	0	0	0	0	0	0	0	0	0		3.81445e-12	2.67431e-12	1.8807e-12	2.61667e-12	0	6.42784e-12	0	0	0	0	0	0	0	0	0	0	0	0	0	0	0	0	0	0
20.97	84	14	5	2	0	1	1	1	0	0	0	0	0	0	0	0	0	0	0	0	0	0	0	0		4.71196e-12	1.78287e-12	1.8807e-12	2.61667e-12	0	6.42784e-12	1.59185e-11	3.5325e-11	0	0	0	0	0	0	0	0	0	0	0	0	0	0	0	0
22.368	75	15	6	1	2	0	0	0	0	0	0	0	0	0	0	0	0	0	0	0	0	0	0	0		4.20711e-12	1.91022e-12	2.25684e-12	1.30833e-12	5.74882e-12	0	0	0	0	0	0	0	0	0	0	0	0	0	0	0	0	0	0	0
23.766	66	13	4	3	0	1	1	0	0	0	0	0	0	0	0	0	0	0	0	0	0	0	0	0		3.70226e-12	1.65552e-12	1.50456e-12	3.925e-12	0	6.42784e-12	1.59185e-11	0	0	0	0	0	0	0	0	0	0	0	0	0	0	0	0	0
25.164	90	13	7	0	0	1	0	0	0	0	0	0	0	0	0	0	0	0	0	0	0	0	0	0		5.04853e-12	1.65552e-12	2.63298e-12	0	0	6.42784e-12	0	0	0	0	0	0	0	0	0	0	0	0	0	0	0	0	0	0
26.562	62	6	2	0	0	2	0	0	0	0	0	0	0	0	0	0	0	0	0	0	0	0	0	0		3.47788e-12	7.64088e-13	7.52281e-13	0	0	1.28557e-11	0	0	0	0	0	0	0	0	0	0	0	0	0	0	0	0	0	0
27.96	83	7	8	0	4	1	0	0	0	0	0	0	0	0	0	0	0	0	0	0	0	0	0	0		4.65587e-12	8.91436e-13	3.00912e-12	0	1.14976e-11	6.42784e-12	0	0	0	0	0	0	0	0	0	0	0	0	0	0	0	0	0	0
29.358	66	11	6	1	1	1	0	0	0	0	0	0	0	0	0	0	0	0	0	0	0	0	0	0		3.70226e-12	1.40083e-12	2.25684e-12	1.30833e-12	2.87441e-12	6.42784e-12	0	0	0	0	0	0	0	0	0	0	0	0	0	0	0	0	0	0
30.756	56	8	3	1	0	1	0	1	0	0	0	0	0	0	0	0	0	0	0	0	0	0	0	0		3.14131e-12	1.01878e-12	1.12842e-12	1.30833e-12	0	6.42784e-12	0	3.5325e-11	0	0	0	0	0	0	0	0	0	0	0	0	0	0	0	0
32.154	120	15	7	1	2	1	0	0	0	0	0	0	0	0	0	0	0	0	0	0	0	0	0	0		6.73137e-12	1.91022e-12	2.63298e-12	1.30833e-12	5.74882e-12	6.42784e-12	0	0	0	0	0	0	0	0	0	0	0	0	0	0	0	0	0	0
33.552	88	10	10	0	1	1	0	1	0	0	0	0	0	0	0	0	0	0	0	0	0	0	0	0		4.93634e-12	1.27348e-12	3.76141e-12	0	2.87441e-12	6.42784e-12	0	3.5325e-11	0	0	0	0	0	0	0	0	0	0	0	0	0	0	0	0
34.95	110	18	5	1	3	3	0	0	0	0	0	0	0	0	0	0	0	0	0	0	0	0	0	0		6.17043e-12	2.29226e-12	1.8807e-12	1.30833e-12	8.62323e-12	1.92835e-11	0	0	0	0	0	0	0	0	0	0	0	0	0	0	0	0	0	0
36.348	103	23	7	1	0	0	3	0	0	0	0	0	0	0	0	0	0	0	0	0	0	0	0	0		5.77776e-12	2.929e-12	2.63298e-12	1.30833e-12	0	0	4.77555e-11	0	0	0	0	0	0	0	0	0	0	0	0	0	0	0	0	0
37.746	107	29	6	2	3	0	0	0	1	0	0	0	0	0	0	0	0	0	0	0	0	0	0	0		6.00214e-12	3.69309e-12	2.25684e-12	2.61667e-12	8.62323e-12	0	0	0	8.37333e-11	0	0	0	0	0	0	0	0	0	0	0	0	0	0	0
39.144	89	12	5	0	2	0	0	0	0	0	0	0	0	0	0	0	0	0	0	0	0	0	0	0		4.99244e-12	1.52818e-12	1.8807e-12	0	5.74882e-12	0	0	0	0	0	0	0	0	0	0	0	0	0	0	0	0	0	0	0
40.542	71	16	6	2	2	2	1	0	0	0	0	0	0	0	0	0	0	0	0	0	0	0	0	0		3.98273e-12	2.03757e-12	2.25684e-12	2.61667e-12	5.74882e-12	1.28557e-11	1.59185e-11	0	0	0	0	0	0	0	0	0	0	0	0	0	0	0	0	0
41.94	107	25	4	2	1	1	0	0	0	0	0	0	0	0	0	0	0	0	0	0	0	0	0	0		6.00214e-12	3.1837e-12	1.50456e-12	2.61667e-12	2.87441e-12	6.42784e-12	0	0	0	0	0	0	0	0	0	0	0	0	0	0	0	0	0	0
43.338	119	22	4	0	1	2	0	0	0	0	0	0	0	0	0	0	0	0	0	0	0	0	0	0		6.67528e-12	2.80165e-12	1.50456e-12	0	2.87441e-12	1.28557e-11	0	0	0	0	0	0	0	0	0	0	0	0	0	0	0	0	0	0
44.736	55	10	2	2	2	1	0	0	0	0	0	0	0	0	0	0	0	0	0	0	0	0	0	0		3.08521e-12	1.27348e-12	7.52281e-13	2.61667e-12	5.74882e-12	6.42784e-12	0	0	0	0	0	0	0	0	0	0	0	0	0	0	0	0	0	0
46.134	88	15	6	0	0	0	0	1	0	0	0	0	0	0	0	0	0	0	0	0	0	0	0	0		4.93634e-12	1.91022e-12	2.25684e-12	0	0	0	0	3.5325e-11	0	0	0	0	0	0	0	0	0	0	0	0	0	0	0	0
47.532	90	11	8	5	1	0	0	0	0	0	0	0	0	0	0	0	0	0	0	0	0	0	0	0		5.04853e-12	1.40083e-12	3.00912e-12	6.54167e-12	2.87441e-12	0	0	0	0	0	0	0	0	0	0	0	0	0	0	0	0	0	0	0
48.93	102	22	7	2	1	2	0	0	0	0	0	0	0	0	0	0	0	0	0	0	0	0	0	0		5.72167e-12	2.80165e-12	2.63298e-12	2.61667e-12	2.87441e-12	1.28557e-11	0	0	0	0	0	0	0	0	0	0	0	0	0	0	0	0	0	0
50.328	84	18	4	0	1	1	0	0	0	0	0	0	0	0	0	0	0	0	0	0	0	0	0	0		4.71196e-12	2.29226e-12	1.50456e-12	0	2.87441e-12	6.42784e-12	0	0	0	0	0	0	0	0	0	0	0	0	0	0	0	0	0	0
51.726	90	21	4	1	0	0	0	0	0	0	0	0	0	0	0	0	0	0	0	0	0	0	0	0		5.04853e-12	2.67431e-12	1.50456e-12	1.30833e-12	0	0	0	0	0	0	0	0	0	0	0	0	0	0	0	0	0	0	0	0
53.124	96	22	6	1	0	0	1	0	0	0	0	0	0	0	0	0	0	0	0	0	0	0	0	0		5.3851e-12	2.80165e-12	2.25684e-12	1.30833e-12	0	0	1.59185e-11	0	0	0	0	0	0	0	0	0	0	0	0	0	0	0	0	0
54.522	95	17	8	0	1	1	0	0	1	0	0	0	0	0	0	0	0	0	0	0	0	0	0	0		5.32901e-12	2.16491e-12	3.00912e-12	0	2.87441e-12	6.42784e-12	0	0	8.37333e-11	0	0	0	0	0	0	0	0	0	0	0	0	0	0	0
55.92	82	22	11	2	2	1	2	0	0	0	0	0	0	0	0	0	0	0	0	0	0	0	0	0		4.59977e-12	2.80165e-12	4.13755e-12	2.61667e-12	5.74882e-12	6.42784e-12	3.1837e-11	0	0	0	0	0	0	0	0	0	0	0	0	0	0	0	0	0
57.318	136	31	17	2	4	1	0	0	0	1	0	0	0	0	0	0	0	0	0	0	0	0	0	0		7.62889e-12	3.94779e-12	6.39439e-12	2.61667e-12	1.14976e-11	6.42784e-12	0	0	0	1.83962e-10	0	0	0	0	0	0	0	0	0	0	0	0	0	0
58.716	135	43	14	2	2	1	1	0	0	0	0	0	0	0	0	0	0	0	0	0	0	0	0	0		7.5728e-12	5.47596e-12	5.26597e-12	2.61667e-12	5.74882e-12	6.42784e-12	1.59185e-11	0	0	0	0	0	0	0	0	0	0	0	0	0	0	0	0	0
60.114	184	74	19	6	10	2	1	0	0	0	0	0	0	0	0	0	0	0	0	0	0	0	0	0		1.03214e-11	9.42375e-12	7.14667e-12	7.85e-12	2.87441e-11	1.28557e-11	1.59185e-11	0	0	0	0	0	0	0	0	0	0	0	0	0	0	0	0	0
61.512	153	97	48	8	7	6	0	0	0	0	0	0	0	0	0	0	0	0	0	0	0	0	0	0		8.5825e-12	1.23527e-11	1.80547e-11	1.04667e-11	2.01209e-11	3.8567e-11	0	0	0	0	0	0	0	0	0	0	0	0	0	0	0	0	0	0
62.91	215	128	55	13	9	1	3	0	0	0	0	0	0	0	0	0	0	0	0	0	0	0	0	0		1.20604e-11	1.63005e-11	2.06877e-11	1.70083e-11	2.58697e-11	6.42784e-12	4.77555e-11	0	0	0	0	0	0	0	0	0	0	0	0	0	0	0	0	0
64.308	155	136	93	26	26	17	2	0	0	0	0	0	0	0	0	0	0	0	0	0	0	0	0	0		8.69469e-12	1.73193e-11	3.49811e-11	3.40167e-11	7.47346e-11	1.09273e-10	3.1837e-11	0	0	0	0	0	0	0	0	0	0	0	0	0	0	0	0	0
65.706	195	139	66	24	17	8	3	1	0	1	0	0	0	0	0	0	0	0	0	0	0	0	0	0		1.09385e-11	1.77014e-11	2.48253e-11	3.14e-11	4.88649e-11	5.14227e-11	4.77555e-11	3.5325e-11	0	1.83962e-10	0	0	0	0	0	0	0	0	0	0	0	0	0	0
67.104	155	140	92	35	44	38	15	1	1	1	0	0	0	0	0	0	0	0	0	0	0	0	0	0		8.69469e-12	1.78287e-11	3.46049e-11	4.57917e-11	1.26474e-10	2.44258e-10	2.38777e-10	3.5325e-11	8.37333e-11	1.83962e-10	0	0	0	0	0	0	0	0	0	0	0	0	0	0
68.502	178	152	83	19	22	14	6	0	1	0	0	0	0	0	0	0	0	0	0	0	0	0	0	0		9.98487e-12	1.93569e-11	3.12197e-11	2.48583e-11	6.3237e-11	8.99898e-11	9.55109e-11	0	8.37333e-11	0	0	0	0	0	0	0	0	0	0	0	0	0	0	0
69.9	112	150	171	65	81	60	30	4	2	0	0	0	0	0	0	0	0	0	0	0	0	0	0	0		6.28262e-12	1.91022e-11	6.432e-11	8.50417e-11	2.32827e-10	3.8567e-10	4.77555e-10	1.413e-10	1.67467e-10	0	0	0	0	0	0	0	0	0	0	0	0	0	0	0
71.298	34	52	80	39	59	149	184	96	76	32	6	1	0	0	0	0	0	0	0	0	0	0	0	0		1.90722e-12	6.62209e-12	3.00912e-11	5.1025e-11	1.6959e-10	9.57748e-10	2.929e-09	3.3912e-09	6.36373e-09	5.88679e-09	2.15581e-09	6.69867e-10	0	0	0	0	0	0	0	0	0	0	0	0
72.696	58	81	85	49	105	150	201	58	51	14	0	0	0	0	0	0	0	0	0	0	0	0	0	0		3.2535e-12	1.03152e-11	3.1972e-11	6.41083e-11	3.01813e-10	9.64176e-10	3.19962e-09	2.04885e-09	4.2704e-09	2.57547e-09	0	0	0	0	0	0	0	0	0	0	0	0	0	0
74.094	29	36	47	30	66	164	271	53	56	30	1	0	0	0	0	0	0	0	0	0	0	0	0	0		1.62675e-12	4.58453e-12	1.76786e-11	3.925e-11	1.89711e-10	1.05417e-09	4.31391e-09	1.87223e-09	4.68907e-09	5.51886e-09	3.59301e-10	0	0	0	0	0	0	0	0	0	0	0	0	0
75.492	9	4	6	1	10	36	161	115	254	219	129	30	1	0	0	0	0	0	0	0	0	0	0	0		5.04853e-13	5.09392e-13	2.25684e-12	1.30833e-12	2.87441e-11	2.31402e-10	2.56288e-09	4.06238e-09	2.12683e-08	4.02877e-08	4.63498e-08	2.0096e-08	1.30833e-09	0	0	0	0	0	0	0	0	0	0	0
76.89	7	8	4	7	6	26	101	117	244	216	116	37	5	0	0	0	0	0	0	0	0	0	0	0		3.92664e-13	1.01878e-12	1.50456e-12	9.15833e-12	1.72465e-11	1.67124e-10	1.60777e-09	4.13303e-09	2.04309e-08	3.97358e-08	4.16789e-08	2.47851e-08	6.54167e-09	0	0	0	0	0	0	0	0	0	0	0
78.288	15	16	18	5	35	81	136	114	177	151	60	17	6	0	0	0	0	0	0	0	0	0	0	0		8.41422e-13	2.03757e-12	6.77053e-12	6.54167e-12	1.00604e-10	5.20655e-10	2.16491e-09	4.02705e-09	1.48208e-08	2.77783e-08	2.15581e-08	1.13877e-08	7.85e-09	0	0	0	0	0	0	0	0	0	0	0
79.686	24	39	63	29	99	236	370	78	26	18	3	1	1	0	0	0	0	0	0	0	0	0	0	0		1.34627e-12	4.96657e-12	2.36969e-11	3.79417e-11	2.84566e-10	1.51697e-09	5.88984e-09	2.75535e-09	2.17707e-09	3.31132e-09	1.0779e-09	6.69867e-10	1.30833e-09	0	0	0	0	0	0	0	0	0	0	0
81.084	9	2	14	8	18	41	95	93	264	276	113	23	0	0	0	0	0	0	0	0	0	0	0	0		5.04853e-13	2.54696e-13	5.26597e-12	1.04667e-11	5.17394e-11	2.63542e-10	1.51226e-09	3.28523e-09	2.21056e-08	5.07735e-08	4.0601e-08	1.54069e-08	0	0	0	0	0	0	0	0	0	0	0	0
82.482	0	0	0	2	0	2	18	73	266	397	191	28	6	1	0	0	0	0	0	0	0	0	0	0		0	0	0	2.61667e-12	0	1.28557e-11	2.86533e-10	2.57873e-09	2.22731e-08	7.3033e-08	6.86265e-08	1.87563e-08	7.85e-09	2.2608e-09	0	0	0	0	0	0	0	0	0	0
83.88	0	0	0	0	1	3	17	61	251	410	203	29	1	0	0	0	0	0	0	0	0	0	0	0		0	0	0	0	2.87441e-12	1.92835e-11	2.70614e-10	2.15483e-09	2.10171e-08	7.54245e-08	7.29381e-08	1.94261e-08	1.30833e-09	0	0	0	0	0	0	0	0	0	0	0
85.278	2	0	0	2	1	3	25	50	235	412	180	34	3	0	0	0	0	0	0	0	0	0	0	0		1.1219e-13	0	0	2.61667e-12	2.87441e-12	1.92835e-11	3.97962e-10	1.76625e-09	1.96773e-08	7.57924e-08	6.46742e-08	2.27755e-08	3.925e-09	0	0	0	0	0	0	0	0	0	0	0
86.676	0	2	0	0	1	1	26	48	255	373	232	48	2	0	0	0	0	0	0	0	0	0	0	0		0	2.54696e-13	0	0	2.87441e-12	6.42784e-12	4.13881e-10	1.6956e-09	2.1352e-08	6.86179e-08	8.33578e-08	3.21536e-08	2.61667e-09	0	0	0	0	0	0	0	0	0	0	0
88.074	0	0	1	2	0	4	19	45	232	424	188	43	3	0	0	0	0	0	0	0	0	0	0	0		0	0	3.76141e-13	2.61667e-12	0	2.57114e-11	3.02451e-10	1.58963e-09	1.94261e-08	7.79999e-08	6.75486e-08	2.88043e-08	3.925e-09	0	0	0	0	0	0	0	0	0	0	0
89.472	2	0	0	0	0	6	30	59	265	394	191	36	7	0	0	0	0	0	0	0	0	0	0	0		1.1219e-13	0	0	0	0	3.8567e-11	4.77555e-10	2.08418e-09	2.21893e-08	7.24811e-08	6.86265e-08	2.41152e-08	9.15833e-09	0	0	0	0	0	0	0	0	0	0	0
90.87	0	0	0	0	0	0	13	29	158	360	276	87	12	2	0	0	0	0	0	0	0	0	0	0		0	0	0	0	0	0	2.0694e-10	1.02443e-09	1.32299e-08	6.62264e-08	9.91671e-08	5.82784e-08	1.57e-08	4.5216e-09	0	0	0	0	0	0	0	0	0	0
92.268	1	0	0	1	0	1	7	36	154	374	257	82	19	1	0	0	0	0	0	0	0	0	0	0		5.60948e-14	0	0	1.30833e-12	0	6.42784e-12	1.11429e-10	1.2717e-09	1.28949e-08	6.88018e-08	9.23404e-08	5.49291e-08	2.48583e-08	2.2608e-09	0	0	0	0	0	0	0	0	0	0
93.666	0	1	0	0	0	2	16	49	204	373	248	65	10	1	0	0	0	0	0	0	0	0	0	0		0	1.27348e-13	0	0	0	1.28557e-11	2.54696e-10	1.73093e-09	1.70816e-08	6.86179e-08	8.91067e-08	4.35413e-08	1.30833e-08	2.2608e-09	0	0	0	0	0	0	0	0	0	0
95.064	0	0	0	0	0	3	21	26	227	387	234	55	5	0	0	0	0	0	0	0	0	0	0	0		0	0	0	0	0	1.92835e-11	3.34288e-10	9.1845e-10	1.90075e-08	7.11933e-08	8.40764e-08	3.68427e-08	6.54167e-09	0	0	0	0	0	0	0	0	0	0	0
96.462	0	0	0	0	1	2	22	39	206	370	242	78	4	0	0	0	0	0	0	0	0	0	0	0		0	0	0	0	2.87441e-12	1.28557e-11	3.50207e-10	1.37768e-09	1.72491e-08	6.8066e-08	8.69509e-08	5.22496e-08	5.23333e-09	0	0	0	0	0	0	0	0	0	0	0
97.86	1	0	0	0	0	3	8	32	146	313	271	90	12	0	0	0	0	0	0	0	0	0	0	0		5.60948e-14	0	0	0	0	1.92835e-11	1.27348e-10	1.1304e-09	1.22251e-08	5.75801e-08	9.73706e-08	6.0288e-08	1.57e-08	0	0	0	0	0	0	0	0	0	0	0
99.258	1	1	1	0	0	2	10	26	160	350	302	89	14	1	0	0	0	0	0	0	0	0	0	0		5.60948e-14	1.27348e-13	3.76141e-13	0	0	1.28557e-11	1.59185e-10	9.1845e-10	1.33973e-08	6.43867e-08	1.08509e-07	5.96181e-08	1.83167e-08	2.2608e-09	0	0	0	0	0	0	0	0	0	0
100.656	1	0	0	0	1	4	8	19	148	364	268	84	11	0	0	0	0	0	0	0	0	0	0	0		5.60948e-14	0	0	0	2.87441e-12	2.57114e-11	1.27348e-10	6.71175e-10	1.23925e-08	6.69622e-08	9.62927e-08	5.62688e-08	1.43917e-08	0	0	0	0	0	0	0	0	0	0	0
102.054	0	0	0	1	0	3	8	23	166	357	313	95	16	0	0	0	0	0	0	0	0	0	0	0		0	0	0	1.30833e-12	0	1.92835e-11	1.27348e-10	8.12475e-10	1.38997e-08	6.56745e-08	1.12461e-07	6.36373e-08	2.09333e-08	0	0	0	0	0	0	0	0	0	0	0
103.452	0	0	1	0	0	2	15	28	192	345	275	82	9	0	0	0	0	0	0	0	0	0	0	0		0	0	3.76141e-13	0	0	1.28557e-11	2.38777e-10	9.891e-10	1.60768e-08	6.34669e-08	9.88078e-08	5.49291e-08	1.1775e-08	0	0	0	0	0	0	0	0	0	0	0
104.85	3	0	1	0	0	0	10	26	147	365	282	74	9	0	0	0	0	0	0	0	0	0	0	0		1.68284e-13	0	3.76141e-13	0	0	0	1.59185e-10	9.1845e-10	1.23088e-08	6.71462e-08	1.01323e-07	4.95701e-08	1.1775e-08	0	0	0	0	0	0	0	0	0	0	0
106.248	2	0	0	0	0	3	9	22	130	318	288	80	9	0	0	0	0	0	0	0	0	0	0	0		1.1219e-13	0	0	0	0	1.92835e-11	1.43266e-10	7.7715e-10	1.08853e-08	5.85e-08	1.03479e-07	5.35893e-08	1.1775e-08	0	0	0	0	0	0	0	0	0	0	0
107.646	2	1	1	0	2	0	11	26	140	313	301	105	29	4	2	0	0	0	0	0	0	0	0	0		1.1219e-13	1.27348e-13	3.76141e-13	0	5.74882e-12	0	1.75103e-10	9.1845e-10	1.17227e-08	5.75801e-08	1.0815e-07	7.0336e-08	3.79417e-08	9.0432e-09	7.18013e-09	0	0	0	0	0	0	0	0	0
109.044	0	3	0	0	0	2	10	16	121	304	306	133	24	2	0	0	0	0	0	0	0	0	0	0		0	3.82044e-13	0	0	0	1.28557e-11	1.59185e-10	5.652e-10	1.01317e-08	5.59245e-08	1.09946e-07	8.90923e-08	3.14e-08	4.5216e-09	0	0	0	0	0	0	0	0	0	0
110.442	1	0	0	1	0	0	6	15	109	300	282	151	29	2	0	0	0	0	0	0	0	0	0	0		5.60948e-14	0	0	1.30833e-12	0	0	9.55109e-11	5.29875e-10	9.12693e-09	5.51886e-08	1.01323e-07	1.0115e-07	3.79417e-08	4.5216e-09	0	0	0	0	0	0	0	0	0	0
111.84	1	0	1	0	1	1	13	25	197	372	216	61	14	1	0	0	0	0	0	0	0	0	0	0		5.60948e-14	0	3.76141e-13	0	2.87441e-12	6.42784e-12	2.0694e-10	8.83125e-10	1.64955e-08	6.84339e-08	7.7609e-08	4.08619e-08	1.83167e-08	2.2608e-09	0	0	0	0	0	0	0	0	0	0
113.238	2	3	0	0	0	1	5	24	112	253	230	80	3	1	0	0	0	0	0	0	0	0	0	0		1.1219e-13	3.82044e-13	0	0	0	6.42784e-12	7.95925e-11	8.478e-10	9.37813e-09	4.65424e-08	8.26392e-08	5.35893e-08	3.925e-09	2.2608e-09	0	0	0	0	0	0	0	0	0	0
114.636	1	1	0	0	0	0	5	11	38	169	232	187	25	6	0	0	0	0	0	0	0	0	0	0		5.60948e-14	1.27348e-13	0	0	0	0	7.95925e-11	3.88575e-10	3.18187e-09	3.10896e-08	8.33578e-08	1.25265e-07	3.27083e-08	1.35648e-08	0	0	0	0	0	0	0	0	0	0
116.034	2	0	0	0	0	1	1	7	69	212	277	222	86	9	0	0	0	0	0	0	0	0	0	0		1.1219e-13	0	0	0	0	6.42784e-12	1.59185e-11	2.47275e-10	5.7776e-09	3.9e-08	9.95264e-08	1.4871e-07	1.12517e-07	2.03472e-08	0	0	0	0	0	0	0	0	0	0
117.432	1	0	0	0	1	0	4	19	88	259	297	173	58	7	0	0	0	0	0	0	0	0	0	0		5.60948e-14	0	0	0	2.87441e-12	0	6.3674e-11	6.71175e-10	7.36853e-09	4.76462e-08	1.06712e-07	1.15887e-07	7.58833e-08	1.58256e-08	0	0	0	0	0	0	0	0	0	0
118.83	1	0	0	0	0	1	8	11	76	262	321	222	48	3	1	0	0	0	0	0	0	0	0	0		5.60948e-14	0	0	0	0	6.42784e-12	1.27348e-10	3.88575e-10	6.36373e-09	4.81981e-08	1.15336e-07	1.4871e-07	6.28e-08	6.7824e-09	3.59007e-09	0	0	0	0	0	0	0	0	0
120.228	1	0	0	0	0	1	4	11	58	226	312	217	76	9	0	0	0	0	0	0	0	0	0	0		5.60948e-14	0	0	0	0	6.42784e-12	6.3674e-11	3.88575e-10	4.85653e-09	4.15754e-08	1.12102e-07	1.45361e-07	9.94333e-08	2.03472e-08	0	0	0	0	0	0	0	0	0	0
121.626	2	0	0	0	0	0	2	8	61	221	265	213	67	8	0	0	0	0	0	0	0	0	0	0		1.1219e-13	0	0	0	0	0	3.1837e-11	2.826e-10	5.10773e-09	4.06556e-08	9.52148e-08	1.42682e-07	8.76583e-08	1.80864e-08	0	0	0	0	0	0	0	0	0	0
123.024	0	0	0	0	1	0	3	11	65	204	302	192	75	8	1	0	0	0	0	0	0	0	0	0		0	0	0	0	2.87441e-12	0	4.77555e-11	3.88575e-10	5.44267e-09	3.75283e-08	1.08509e-07	1.28614e-07	9.8125e-08	1.80864e-08	3.59007e-09	0	0	0	0	0	0	0	0	0
124.422	4	0	0	0	1	0	1	9	68	207	325	192	82	13	2	0	0	0	0	0	0	0	0	0		2.24379e-13	0	0	0	2.87441e-12	0	1.59185e-11	3.17925e-10	5.69387e-09	3.80802e-08	1.16773e-07	1.28614e-07	1.07283e-07	2.93904e-08	7.18013e-09	0	0	0	0	0	0	0	0	0
125.82	3	0	1	1	1	1	7	6	47	190	294	231	75	9	2	0	0	0	0	0	0	0	0	0		1.68284e-13	0	3.76141e-13	1.30833e-12	2.87441e-12	6.42784e-12	1.11429e-10	2.1195e-10	3.93547e-09	3.49528e-08	1.05635e-07	1.54739e-07	9.8125e-08	2.03472e-08	7.18013e-09	0	0	0	0	0	0	0	0	0
127.218	0	2	0	0	2	0	13	13	53	172	236	206	84	6	1	1	0	0	0	0	0	0	0	0		0	2.54696e-13	0	0	5.74882e-12	0	2.0694e-10	4.59225e-10	4.43787e-09	3.16415e-08	8.4795e-08	1.37993e-07	1.099e-07	1.35648e-08	3.59007e-09	5.35893e-09	0	0	0	0	0	0	0	0
128.616	6	3	5	1	1	3	15	12	64	213	223	207	99	19	6	0	0	0	0	0	0	0	0	0		3.36569e-13	3.82044e-13	1.8807e-12	1.30833e-12	2.87441e-12	1.92835e-11	2.38777e-10	4.239e-10	5.35893e-09	3.91839e-08	8.01241e-08	1.38662e-07	1.29525e-07	4.29552e-08	2.15404e-08	0	0	0	0	0	0	0	0	0
130.014	2	1	0	1	1	0	5	13	72	211	256	197	92	28	4	0	0	0	0	0	0	0	0	0		1.1219e-13	1.27348e-13	0	1.30833e-12	2.87441e-12	0	7.95925e-11	4.59225e-10	6.0288e-09	3.8816e-08	9.19811e-08	1.31964e-07	1.20367e-07	6.33024e-08	1.43603e-08	0	0	0	0	0	0	0	0	0
131.412	0	3	2	0	0	3	9	11	64	175	234	204	84	12	0	0	0	0	0	0	0	0	0	0		0	3.82044e-13	7.52281e-13	0	0	1.92835e-11	1.43266e-10	3.88575e-10	5.35893e-09	3.21934e-08	8.40764e-08	1.36653e-07	1.099e-07	2.71296e-08	0	0	0	0	0	0	0	0	0	0
132.81	1	0	1	2	1	1	4	17	82	169	256	192	94	5	1	0	0	0	0	0	0	0	0	0		5.60948e-14	0	3.76141e-13	2.61667e-12	2.87441e-12	6.42784e-12	6.3674e-11	6.00525e-10	6.86613e-09	3.10896e-08	9.19811e-08	1.28614e-07	1.22983e-07	1.1304e-08	3.59007e-09	0	0	0	0	0	0	0	0	0
134.208	9	4	4	2	2	9	29	26	107	216	216	140	65	6	0	0	0	0	0	0	0	0	0	0		5.04853e-13	5.09392e-13	1.50456e-12	2.61667e-12	5.74882e-12	5.78506e-11	4.61636e-10	9.1845e-10	8.95947e-09	3.97358e-08	7.7609e-08	9.37813e-08	8.50417e-08	1.35648e-08	0	0	0	0	0	0	0	0	0	0
135.606	6	1	2	1	0	5	22	25	113	216	231	139	52	5	0	0	0	0	0	0	0	0	0	0		3.36569e-13	1.27348e-13	7.52281e-13	1.30833e-12	0	3.21392e-11	3.50207e-10	8.83125e-10	9.46187e-09	3.97358e-08	8.29985e-08	9.31115e-08	6.80333e-08	1.1304e-08	0	0	0	0	0	0	0	0	0	0
137.004	8	4	3	2	3	3	15	27	79	210	227	153	43	4	0	0	0	0	0	0	0	0	0	0		4.48758e-13	5.09392e-13	1.12842e-12	2.61667e-12	8.62323e-12	1.92835e-11	2.38777e-10	9.53775e-10	6.61493e-09	3.8632e-08	8.15613e-08	1.0249e-07	5.62583e-08	9.0432e-09	0	0	0	0	0	0	0	0	0	0
138.402	7	1	3	2	4	5	18	25	87	222	251	173	59	6	0	0	0	0	0	0	0	0	0	0		3.92664e-13	1.27348e-13	1.12842e-12	2.61667e-12	1.14976e-11	3.21392e-11	2.86533e-10	8.83125e-10	7.2848e-09	4.08396e-08	9.01846e-08	1.15887e-07	7.71917e-08	1.35648e-08	0	0	0	0	0	0	0	0	0	0
139.8	25	19	14	9	19	34	47	42	113	199	191	129	56	8	1	0	0	0	0	0	0	0	0	0		1.40237e-12	2.41961e-12	5.26597e-12	1.1775e-11	5.46138e-11	2.18547e-10	7.48169e-10	1.48365e-09	9.46187e-09	3.66085e-08	6.86265e-08	8.64128e-08	7.32667e-08	1.80864e-08	3.59007e-09	0	0	0	0	0	0	0	0	0
141.198	43	27	21	5	17	27	58	43	117	179	161	118	47	7	1	0	0	0	0	0	0	0	0	0		2.41208e-12	3.43839e-12	7.89895e-12	6.54167e-12	4.88649e-11	1.73552e-10	9.23273e-10	1.51898e-09	9.7968e-09	3.29292e-08	5.78475e-08	7.90443e-08	6.14917e-08	1.58256e-08	3.59007e-09	0	0	0	0	0	0	0	0	0
142.596	53	30	28	13	28	49	79	52	102	159	154	78	36	6	0	0	0	0	0	0	0	0	0	0		2.97302e-12	3.82044e-12	1.05319e-11	1.70083e-11	8.04834e-11	3.14964e-10	1.25756e-09	1.8369e-09	8.5408e-09	2.925e-08	5.53324e-08	5.22496e-08	4.71e-08	1.35648e-08	0	0	0	0	0	0	0	0	0	0
143.994	43	25	30	13	27	37	74	50	94	138	184	95	42	6	1	0	0	0	0	0	0	0	0	0		2.41208e-12	3.1837e-12	1.12842e-11	1.70083e-11	7.7609e-11	2.3783e-10	1.17797e-09	1.76625e-09	7.87093e-09	2.53868e-08	6.61114e-08	6.36373e-08	5.495e-08	1.35648e-08	3.59007e-09	0	0	0	0	0	0	0	0	0
145.392	39	48	31	15	39	46	69	49	118	146	115	104	21	1	0	0	0	0	0	0	0	0	0	0		2.1877e-12	6.1127e-12	1.16604e-11	1.9625e-11	1.12102e-10	2.95681e-10	1.09838e-09	1.73093e-09	9.88053e-09	2.68585e-08	4.13196e-08	6.96661e-08	2.7475e-08	2.2608e-09	0	0	0	0	0	0	0	0	0	0
146.79	56	50	45	22	46	54	107	54	115	145	111	63	27	8	0	0	0	0	0	0	0	0	0	0		3.14131e-12	6.3674e-12	1.69263e-11	2.87833e-11	1.32223e-10	3.47103e-10	1.70328e-09	1.90755e-09	9.62933e-09	2.66745e-08	3.98824e-08	4.22016e-08	3.5325e-08	1.80864e-08	0	0	0	0	0	0	0	0	0	0
148.188	50	41	39	21	47	54	104	68	115	143	104	41	18	2	0	0	0	0	0	0	0	0	0	0		2.80474e-12	5.22127e-12	1.46695e-11	2.7475e-11	1.35097e-10	3.47103e-10	1.65552e-09	2.4021e-09	9.62933e-09	2.63066e-08	3.73673e-08	2.74645e-08	2.355e-08	4.5216e-09	0	0	0	0	0	0	0	0	0	0
149.586	24	37	25	10	21	49	75	57	117	190	138	77	19	4	0	0	0	0	0	0	0	0	0	0		1.34627e-12	4.71187e-12	9.40352e-12	1.30833e-11	6.03626e-11	3.14964e-10	1.19389e-09	2.01353e-09	9.7968e-09	3.49528e-08	4.95835e-08	5.15797e-08	2.48583e-08	9.0432e-09	0	0	0	0	0	0	0	0	0	0
150.984	60	41	27	16	39	49	92	65	90	170	144	65	33	2	0	0	0	0	0	0	0	0	0	0		3.36569e-12	5.22127e-12	1.01558e-11	2.09333e-11	1.12102e-10	3.14964e-10	1.4645e-09	2.29613e-09	7.536e-09	3.12736e-08	5.17393e-08	4.35413e-08	4.3175e-08	4.5216e-09	0	0	0	0	0	0	0	0	0	0
152.382	30	22	12	5	13	21	31	33	100	214	196	113	30	7	1	0	0	0	0	0	0	0	0	0		1.68284e-12	2.80165e-12	4.51369e-12	6.54167e-12	3.73673e-11	1.34985e-10	4.93473e-10	1.16573e-09	8.37333e-09	3.93679e-08	7.0423e-08	7.56949e-08	3.925e-08	1.58256e-08	3.59007e-09	0	0	0	0	0	0	0	0	0
153.78	21	13	11	5	14	11	48	60	138	220	191	103	35	10	0	0	0	0	0	0	0	0	0	0		1.17799e-12	1.65552e-12	4.13755e-12	6.54167e-12	4.02417e-11	7.07063e-11	7.64088e-10	2.1195e-09	1.15552e-08	4.04717e-08	6.86265e-08	6.89963e-08	4.57917e-08	2.2608e-08	0	0	0	0	0	0	0	0	0	0
155.178	29	20	14	5	22	35	56	60	133	241	196	85	28	2	1	0	0	0	0	0	0	0	0	0		1.62675e-12	2.54696e-12	5.26597e-12	6.54167e-12	6.3237e-11	2.24974e-10	8.91436e-10	2.1195e-09	1.11365e-08	4.43349e-08	7.0423e-08	5.69387e-08	3.66333e-08	4.5216e-09	3.59007e-09	0	0	0	0	0	0	0	0	0
156.576	35	38	24	9	26	39	77	70	113	188	154	88	34	2	0	0	0	0	0	0	0	0	0	0		1.96332e-12	4.83922e-12	9.02737e-12	1.1775e-11	7.47346e-11	2.50686e-10	1.22572e-09	2.47275e-09	9.46187e-09	3.45849e-08	5.53324e-08	5.89483e-08	4.44833e-08	4.5216e-09	0	0	0	0	0	0	0	0	0	0
157.974	8	4	4	4	3	3	12	23	105	226	241	159	51	9	2	1	0	0	0	0	0	0	0	0		4.48758e-13	5.09392e-13	1.50456e-12	5.23333e-12	8.62323e-12	1.92835e-11	1.91022e-10	8.12475e-10	8.792e-09	4.15754e-08	8.65916e-08	1.06509e-07	6.6725e-08	2.03472e-08	7.18013e-09	5.35893e-09	0	0	0	0	0	0	0	0
159.372	13	7	5	5	4	9	26	40	121	305	242	103	27	5	0	0	0	0	0	0	0	0	0	0		7.29232e-13	8.91436e-13	1.8807e-12	6.54167e-12	1.14976e-11	5.78506e-11	4.13881e-10	1.413e-09	1.01317e-08	5.61085e-08	8.69509e-08	6.89963e-08	3.5325e-08	1.1304e-08	0	0	0	0	0	0	0	0	0	0
160.77	23	15	18	4	19	29	72	60	147	268	188	99	24	2	0	0	0	0	0	0	0	0	0	0		1.29018e-12	1.91022e-12	6.77053e-12	5.23333e-12	5.46138e-11	1.86407e-10	1.14613e-09	2.1195e-09	1.23088e-08	4.93019e-08	6.75486e-08	6.63168e-08	3.14e-08	4.5216e-09	0	0	0	0	0	0	0	0	0	0
162.168	60	45	49	22	37	101	192	120	143	94	44	21	28	2	0	0	0	0	0	0	0	0	0	0		3.36569e-12	5.73066e-12	1.84309e-11	2.87833e-11	1.06353e-10	6.49212e-10	3.05635e-09	4.239e-09	1.19739e-08	1.72924e-08	1.58092e-08	1.40672e-08	3.66333e-08	4.5216e-09	0	0	0	0	0	0	0	0	0	0
163.566	13	7	6	5	5	10	27	43	116	262	210	132	19	2	0	0	0	0	0	0	0	0	0	0		7.29232e-13	8.91436e-13	2.25684e-12	6.54167e-12	1.4372e-11	6.42784e-11	4.29799e-10	1.51898e-09	9.71307e-09	4.81981e-08	7.54532e-08	8.84224e-08	2.48583e-08	4.5216e-09	0	0	0	0	0	0	0	0	0	0
164.964	101	128	93	45	57	44	55	25	68	122	94	59	63	10	0	0	0	0	0	0	0	0	0	0		5.66557e-12	1.63005e-11	3.49811e-11	5.8875e-11	1.63841e-10	2.82825e-10	8.75517e-10	8.83125e-10	5.69387e-09	2.24434e-08	3.37743e-08	3.95221e-08	8.2425e-08	2.2608e-08	0	0	0	0	0	0	0	0	0	0
166.362	194	184	108	48	40	44	44	19	31	61	42	16	20	0	0	0	1	0	0	0	0	0	0	0		1.08824e-11	2.3432e-11	4.06232e-11	6.28e-11	1.14976e-10	2.82825e-10	7.00414e-10	6.71175e-10	2.59573e-09	1.12217e-08	1.50906e-08	1.07179e-08	2.61667e-08	0	0	0	7.6302e-09	0	0	0	0	0	0	0
167.76	47	56	52	31	66	75	127	56	107	128	93	62	17	3	0	0	0	0	0	0	0	0	0	0		2.63646e-12	7.13148e-12	1.95593e-11	4.05583e-11	1.89711e-10	4.82088e-10	2.02165e-09	1.9782e-09	8.95947e-09	2.35472e-08	3.3415e-08	4.15317e-08	2.22417e-08	6.7824e-09	0	0	0	0	0	0	0	0	0	0
169.158	20	19	16	6	14	14	38	50	111	212	233	150	21	2	0	0	0	1	0	0	0	0	0	0		1.1219e-12	2.41961e-12	6.01825e-12	7.85e-12	4.02417e-11	8.99898e-11	6.04903e-10	1.76625e-09	9.2944e-09	3.9e-08	8.37171e-08	1.0048e-07	2.7475e-08	4.5216e-09	0	0	0	1.04667e-08	0	0	0	0	0	0
170.556	2	1	2	0	2	3	8	28	111	281	266	136	39	3	0	0	0	0	0	0	0	0	0	0		1.1219e-13	1.27348e-13	7.52281e-13	0	5.74882e-12	1.92835e-11	1.27348e-10	9.891e-10	9.2944e-09	5.16934e-08	9.55741e-08	9.11019e-08	5.1025e-08	6.7824e-09	0	0	0	0	0	0	0	0	0	0
171.954	24	24	24	7	19	33	79	50	108	184	186	96	35	5	2	0	0	0	0	0	0	0	0	0		1.34627e-12	3.05635e-12	9.02737e-12	9.15833e-12	5.46138e-11	2.12119e-10	1.25756e-09	1.76625e-09	9.0432e-09	3.3849e-08	6.683e-08	6.43072e-08	4.57917e-08	1.1304e-08	7.18013e-09	0	0	0	0	0	0	0	0	0
173.352	35	25	24	6	29	27	78	60	102	204	186	91	40	7	1	0	0	0	0	0	0	0	0	0		1.96332e-12	3.1837e-12	9.02737e-12	7.85e-12	8.33578e-11	1.73552e-10	1.24164e-09	2.1195e-09	8.5408e-09	3.75283e-08	6.683e-08	6.09579e-08	5.23333e-08	1.58256e-08	3.59007e-09	0	0	0	0	0	0	0	0	0
174.75	25	29	19	8	17	32	69	50	93	186	176	88	29	5	1	1	0	0	0	0	0	0	0	0		1.40237e-12	3.69309e-12	7.14667e-12	1.04667e-11	4.88649e-11	2.05691e-10	1.09838e-09	1.76625e-09	7.7872e-09	3.4217e-08	6.3237e-08	5.89483e-08	3.79417e-08	1.1304e-08	3.59007e-09	5.35893e-09	0	0	0	0	0	0	0	0
176.148	24	22	15	1	9	19	43	57	96	193	182	93	37	8	0	0	0	0	0	0	0	0	0	0		1.34627e-12	2.80165e-12	5.64211e-12	1.30833e-12	2.58697e-11	1.22129e-10	6.84495e-10	2.01353e-09	8.0384e-09	3.55047e-08	6.53928e-08	6.22976e-08	4.84083e-08	1.80864e-08	0	0	0	0	0	0	0	0	0	0
177.546	52	27	29	17	36	58	71	41	97	116	123	67	16	4	1	0	0	0	0	0	0	0	0	0		2.91693e-12	3.43839e-12	1.09081e-11	2.22417e-11	1.03479e-10	3.72815e-10	1.13021e-09	1.44833e-09	8.12213e-09	2.13396e-08	4.4194e-08	4.48811e-08	2.09333e-08	9.0432e-09	3.59007e-09	0	0	0	0	0	0	0	0	0
178.944	53	50	41	19	42	66	98	67	98	120	103	54	25	1	0	1	0	0	0	0	0	0	0	0		2.97302e-12	6.3674e-12	1.54218e-11	2.48583e-11	1.20725e-10	4.24238e-10	1.56001e-09	2.36678e-09	8.20587e-09	2.20755e-08	3.7008e-08	3.61728e-08	3.27083e-08	2.2608e-09	0	5.35893e-09	0	0	0	0	0	0	0	0
180.342	46	46	64	23	60	74	103	66	102	129	105	35	18	1	0	0	0	0	0	0	0	0	0	0		2.58036e-12	5.858e-12	2.4073e-11	3.00917e-11	1.72465e-10	4.7566e-10	1.6396e-09	2.33145e-09	8.5408e-09	2.37311e-08	3.77266e-08	2.34453e-08	2.355e-08	2.2608e-09	0	0	0	0	0	0	0	0	0	0
181.74	69	101	113	40	98	123	104	58	57	66	45	19	13	1	0	0	0	0	0	0	0	0	0	0		3.87054e-12	1.28621e-11	4.25039e-11	5.23333e-11	2.81692e-10	7.90625e-10	1.65552e-09	2.04885e-09	4.7728e-09	1.21415e-08	1.61685e-08	1.27275e-08	1.70083e-08	2.2608e-09	0	0	0	0	0	0	0	0	0	0
183.138	106	155	181	66	118	104	68	21	22	14	6	3	4	0	0	0	0	0	0	0	0	0	0	0		5.94605e-12	1.97389e-11	6.80814e-11	8.635e-11	3.3918e-10	6.68496e-10	1.08246e-09	7.41825e-10	1.84213e-09	2.57547e-09	2.15581e-09	2.0096e-09	5.23333e-09	0	0	0	0	0	0	0	0	0	0	0
184.536	127	177	153	67	90	80	61	17	31	31	13	2	0	0	0	0	0	0	0	0	0	0	0	0		7.12404e-12	2.25406e-11	5.75495e-11	8.76583e-11	2.58697e-10	5.14227e-10	9.71028e-10	6.00525e-10	2.59573e-09	5.70283e-09	4.67091e-09	1.33973e-09	0	0	0	0	0	0	0	0	0	0	0	0
185.934	149	189	154	66	95	73	56	25	26	20	5	2	3	0	0	0	0	0	0	0	0	0	0	0		8.35812e-12	2.40688e-11	5.79257e-11	8.635e-11	2.73069e-10	4.69232e-10	8.91436e-10	8.83125e-10	2.17707e-09	3.67924e-09	1.79651e-09	1.33973e-09	3.925e-09	0	0	0	0	0	0	0	0	0	0	0
187.332	58	62	56	34	87	139	197	77	84	57	24	10	2	0	0	0	0	0	0	0	0	0	0	0		3.2535e-12	7.89557e-12	2.10639e-11	4.44833e-11	2.50074e-10	8.9347e-10	3.13594e-09	2.72003e-09	7.0336e-09	1.04858e-08	8.62322e-09	6.69867e-09	2.61667e-09	0	0	0	0	0	0	0	0	0	0	0
188.73	61	72	81	39	64	115	176	79	87	69	29	12	3	0	0	0	0	0	0	0	0	0	0	0		3.42178e-12	9.16905e-12	3.04674e-11	5.1025e-11	1.83962e-10	7.39202e-10	2.80165e-09	2.79068e-09	7.2848e-09	1.26934e-08	1.04197e-08	8.0384e-09	3.925e-09	0	0	0	0	0	0	0	0	0	0	0
190.128	39	58	55	29	55	79	100	52	115	124	90	23	4	1	0	0	0	0	0	0	0	0	0	0		2.1877e-12	7.38618e-12	2.06877e-11	3.79417e-11	1.58092e-10	5.07799e-10	1.59185e-09	1.8369e-09	9.62933e-09	2.28113e-08	3.23371e-08	1.54069e-08	5.23333e-09	2.2608e-09	0	0	0	0	0	0	0	0	0	0
191.526	32	21	27	14	20	35	79	67	96	172	134	81	10	0	0	0	0	0	0	0	0	0	0	0		1.79503e-12	2.67431e-12	1.01558e-11	1.83167e-11	5.74882e-11	2.24974e-10	1.25756e-09	2.36678e-09	8.0384e-09	3.16415e-08	4.81463e-08	5.42592e-08	1.30833e-08	0	0	0	0	0	0	0	0	0	0	0
192.924	41	28	31	11	25	38	76	36	110	158	146	85	20	5	0	0	0	0	0	0	0	0	0	0		2.29989e-12	3.56574e-12	1.16604e-11	1.43917e-11	7.18602e-11	2.44258e-10	1.20981e-09	1.2717e-09	9.21067e-09	2.9066e-08	5.2458e-08	5.69387e-08	2.61667e-08	1.1304e-08	0	0	0	0	0	0	0	0	0	0
194.322	34	28	30	13	24	47	73	53	110	149	147	88	34	7	1	0	0	0	0	0	0	0	0	0		1.90722e-12	3.56574e-12	1.12842e-11	1.70083e-11	6.89858e-11	3.02109e-10	1.16205e-09	1.87223e-09	9.21067e-09	2.74104e-08	5.28173e-08	5.89483e-08	4.44833e-08	1.58256e-08	3.59007e-09	0	0	0	0	0	0	0	0	0
195.72	36	17	24	16	34	48	84	50	104	144	150	100	34	6	0	0	0	0	0	0	0	0	0	0		2.01941e-12	2.16491e-12	9.02737e-12	2.09333e-11	9.77299e-11	3.08536e-10	1.33715e-09	1.76625e-09	8.70827e-09	2.64905e-08	5.38952e-08	6.69867e-08	4.44833e-08	1.35648e-08	0	0	0	0	0	0	0	0	0	0
197.118	97	119	110	46	80	67	82	33	69	79	70	29	31	4	0	0	0	0	0	0	0	0	0	0		5.44119e-12	1.51544e-11	4.13755e-11	6.01833e-11	2.29953e-10	4.30665e-10	1.30532e-09	1.16573e-09	5.7776e-09	1.4533e-08	2.51511e-08	1.94261e-08	4.05583e-08	9.0432e-09	0	0	0	0	0	0	0	0	0	0
198.516	49	43	58	30	36	33	69	36	101	135	111	74	20	3	0	0	0	0	0	0	0	0	0	0		2.74864e-12	5.47596e-12	2.18162e-11	3.925e-11	1.03479e-10	2.12119e-10	1.09838e-09	1.2717e-09	8.45707e-09	2.48349e-08	3.98824e-08	4.95701e-08	2.61667e-08	6.7824e-09	0	0	0	0	0	0	0	0	0	0
199.914	49	54	43	17	32	36	69	45	97	139	128	69	27	2	0	0	0	0	0	0	0	0	0	0		2.74864e-12	6.87679e-12	1.6174e-11	2.22417e-11	9.19811e-11	2.31402e-10	1.09838e-09	1.58963e-09	8.12213e-09	2.55707e-08	4.59905e-08	4.62208e-08	3.5325e-08	4.5216e-09	0	0	0	0	0	0	0	0	0	0
201.312	145	182	119	42	63	54	56	20	52	29	28	8	7	2	0	0	0	0	0	0	0	0	0	0		8.13374e-12	2.31773e-11	4.47607e-11	5.495e-11	1.81088e-10	3.47103e-10	8.91436e-10	7.065e-10	4.35413e-09	5.3349e-09	1.00604e-08	5.35893e-09	9.15833e-09	4.5216e-09	0	0	0	0	0	0	0	0	0	0
202.71	93	94	94	39	65	54	65	35	70	94	75	32	6	0	0	0	0	0	0	0	0	0	0	0		5.21682e-12	1.19707e-11	3.53572e-11	5.1025e-11	1.86837e-10	3.47103e-10	1.0347e-09	1.23638e-09	5.86133e-09	1.72924e-08	2.69476e-08	2.14357e-08	7.85e-09	0	0	0	0	0	0	0	0	0	0	0
204.108	143	190	143	48	69	71	47	19	37	36	19	7	12	0	0	0	0	0	0	0	0	0	0	0		8.02156e-12	2.41961e-11	5.37881e-11	6.28e-11	1.98334e-10	4.56377e-10	7.48169e-10	6.71175e-10	3.09813e-09	6.62264e-09	6.82672e-09	4.68907e-09	1.57e-08	0	0	0	0	0	0	0	0	0	0	0
205.506	44	49	41	26	32	52	68	50	102	142	142	89	18	3	0	0	0	0	0	0	0	0	0	0		2.46817e-12	6.24005e-12	1.54218e-11	3.40167e-11	9.19811e-11	3.34248e-10	1.08246e-09	1.76625e-09	8.5408e-09	2.61226e-08	5.10207e-08	5.96181e-08	2.355e-08	6.7824e-09	0	0	0	0	0	0	0	0	0	0
206.904	34	57	41	26	26	50	48	37	106	145	133	67	24	7	0	0	0	0	0	0	0	0	0	0		1.90722e-12	7.25883e-12	1.54218e-11	3.40167e-11	7.47346e-11	3.21392e-10	7.64088e-10	1.30703e-09	8.87573e-09	2.66745e-08	4.7787e-08	4.48811e-08	3.14e-08	1.58256e-08	0	0	0	0	0	0	0	0	0	0
208.302	48	66	63	30	60	78	92	55	99	120	99	55	17	2	0	0	0	0	0	0	0	0	0	0		2.69255e-12	8.40496e-12	2.36969e-11	3.925e-11	1.72465e-10	5.01372e-10	1.4645e-09	1.94288e-09	8.2896e-09	2.20755e-08	3.55708e-08	3.68427e-08	2.22417e-08	4.5216e-09	0	0	0	0	0	0	0	0	0	0
209.7	42	52	47	25	47	59	84	52	103	134	109	62	29	5	0	0	0	0	0	0	0	0	0	0		2.35598e-12	6.62209e-12	1.76786e-11	3.27083e-11	1.35097e-10	3.79243e-10	1.33715e-09	1.8369e-09	8.62453e-09	2.46509e-08	3.91638e-08	4.15317e-08	3.79417e-08	1.1304e-08	0	0	0	0	0	0	0	0	0	0
211.098	184	123	53	21	26	27	30	19	41	50	40	24	22	4	0	0	0	0	0	0	0	0	0	0		1.03214e-11	1.56638e-11	1.99355e-11	2.7475e-11	7.47346e-11	1.73552e-10	4.77555e-10	6.71175e-10	3.43307e-09	9.19811e-09	1.4372e-08	1.60768e-08	2.87833e-08	9.0432e-09	0	0	0	0	0	0	0	0	0	0
212.496	285	70	19	3	3	2	0	1	0	0	0	0	1	0	0	0	0	0	0	0	0	0	0	0		1.5987e-11	8.91436e-12	7.14667e-12	3.925e-12	8.62323e-12	1.28557e-11	0	3.5325e-11	0	0	0	0	1.30833e-09	0	0	0	0	0	0	0	0	0	0	0
213.894	264	71	18	6	0	1	1	0	0	0	0	0	0	0	0	0	0	0	0	0	0	0	0	0		1.4809e-11	9.0417e-12	6.77053e-12	7.85e-12	0	6.42784e-12	1.59185e-11	0	0	0	0	0	0	0	0	0	0	0	0	0	0	0	0	0
215.292	217	42	9	4	1	2	2	0	0	0	0	0	0	0	0	0	0	0	0	0	0	0	0	0		1.21726e-11	5.34861e-12	3.38527e-12	5.23333e-12	2.87441e-12	1.28557e-11	3.1837e-11	0	0	0	0	0	0	0	0	0	0	0	0	0	0	0	0	0
216.69	207	222	159	61	79	35	20	5	0	1	0	0	0	0	0	0	0	0	0	0	0	0	0	0		1.16116e-11	2.82712e-11	5.98064e-11	7.98083e-11	2.27078e-10	2.24974e-10	3.1837e-10	1.76625e-10	0	1.83962e-10	0	0	0	0	0	0	0	0	0	0	0	0	0	0
218.088	52	111	129	68	141	224	201	37	11	2	0	0	2	0	0	0	0	0	0	0	0	0	0	0		2.91693e-12	1.41356e-11	4.85221e-11	8.89667e-11	4.05292e-10	1.43984e-09	3.19962e-09	1.30703e-09	9.21067e-10	3.67924e-10	0	0	2.61667e-09	0	0	0	0	0	0	0	0	0	0	0
219.486	243	236	165	81	82	61	32	4	1	0	0	0	0	0	0	0	0	0	0	0	0	0	0	0		1.3631e-11	3.00541e-11	6.20632e-11	1.05975e-10	2.35701e-10	3.92098e-10	5.09392e-10	1.413e-10	8.37333e-11	0	0	0	0	0	0	0	0	0	0	0	0	0	0	0
220.884	268	239	112	38	36	13	3	0	0	0	0	0	0	0	0	0	0	0	0	0	0	0	0	0		1.50334e-11	3.04362e-11	4.21277e-11	4.97167e-11	1.03479e-10	8.35619e-11	4.77555e-11	0	0	0	0	0	0	0	0	0	0	0	0	0	0	0	0	0
222.282	175	184	117	59	81	65	54	6	3	1	0	0	0	0	0	0	0	0	0	0	0	0	0	0		9.81659e-12	2.3432e-11	4.40085e-11	7.71917e-11	2.32827e-10	4.1781e-10	8.59599e-10	2.1195e-10	2.512e-10	1.83962e-10	0	0	0	0	0	0	0	0	0	0	0	0	0	0
223.68	272	199	110	27	28	13	6	2	0	0	0	0	0	0	0	0	0	0	0	0	0	0	0	0		1.52578e-11	2.53422e-11	4.13755e-11	3.5325e-11	8.04834e-11	8.35619e-11	9.55109e-11	7.065e-11	0	0	0	0	0	0	0	0	0	0	0	0	0	0	0	0
225.078	269	155	80	14	7	4	4	1	1	1	0	0	0	0	0	0	0	0	0	0	0	0	0	0		1.50895e-11	1.97389e-11	3.00912e-11	1.83167e-11	2.01209e-11	2.57114e-11	6.3674e-11	3.5325e-11	8.37333e-11	1.83962e-10	0	0	0	0	0	0	0	0	0	0	0	0	0	0
226.476	48	49	40	28	60	74	166	92	131	106	44	23	1	0	0	0	0	0	0	0	0	0	0	0		2.69255e-12	6.24005e-12	1.50456e-11	3.66333e-11	1.72465e-10	4.7566e-10	2.64247e-09	3.2499e-09	1.09691e-08	1.95e-08	1.58092e-08	1.54069e-08	1.30833e-09	0	0	0	0	0	0	0	0	0	0	0
227.874	60	72	73	43	81	123	186	73	85	65	38	23	3	0	0	0	0	0	0	0	0	0	0	0		3.36569e-12	9.16905e-12	2.74583e-11	5.62583e-11	2.32827e-10	7.90625e-10	2.96084e-09	2.57873e-09	7.11733e-09	1.19575e-08	1.36534e-08	1.54069e-08	3.925e-09	0	0	0	0	0	0	0	0	0	0	0
229.272	43	54	61	41	66	117	154	71	85	83	55	21	0	1	0	0	0	0	0	0	0	0	0	0		2.41208e-12	6.87679e-12	2.29446e-11	5.36417e-11	1.89711e-10	7.52057e-10	2.45145e-09	2.50808e-09	7.11733e-09	1.52689e-08	1.97616e-08	1.40672e-08	0	2.2608e-09	0	0	0	0	0	0	0	0	0	0
230.67	148	173	140	45	81	93	80	30	37	23	13	4	19	2	0	0	0	0	0	0	0	0	0	0		8.30203e-12	2.20312e-11	5.26597e-11	5.8875e-11	2.32827e-10	5.97789e-10	1.27348e-09	1.05975e-09	3.09813e-09	4.23113e-09	4.67091e-09	2.67947e-09	2.48583e-08	4.5216e-09	0	0	0	0	0	0	0	0	0	0
232.068	31	57	56	26	66	140	261	113	79	47	15	8	0	0	0	0	0	0	0	0	0	0	0	0		1.73894e-12	7.25883e-12	2.10639e-11	3.40167e-11	1.89711e-10	8.99898e-10	4.15473e-09	3.99173e-09	6.61493e-09	8.64622e-09	5.38952e-09	5.35893e-09	0	0	0	0	0	0	0	0	0	0	0	0
233.466	43	47	46	29	54	97	177	88	99	62	48	18	1	0	0	0	0	0	0	0	0	0	0	0		2.41208e-12	5.98535e-12	1.73025e-11	3.79417e-11	1.55218e-10	6.23501e-10	2.81757e-09	3.1086e-09	8.2896e-09	1.14057e-08	1.72464e-08	1.20576e-08	1.30833e-09	0	0	0	0	0	0	0	0	0	0	0
234.864	46	26	29	11	22	54	113	85	137	112	104	56	7	1	0	0	0	0	0	0	0	0	0	0		2.58036e-12	3.31105e-12	1.09081e-11	1.43917e-11	6.3237e-11	3.47103e-10	1.79879e-09	3.00263e-09	1.14715e-08	2.06038e-08	3.73673e-08	3.75125e-08	9.15833e-09	2.2608e-09	0	0	0	0	0	0	0	0	0	0
236.262	35	14	13	3	5	22	55	48	114	117	121	103	30	9	0	0	0	0	0	0	0	0	0	0		1.96332e-12	1.78287e-12	4.88983e-12	3.925e-12	1.4372e-11	1.41413e-10	8.75517e-10	1.6956e-09	9.5456e-09	2.15236e-08	4.34754e-08	6.89963e-08	3.925e-08	2.03472e-08	0	0	0	0	0	0	0	0	0	0
237.66	41	19	16	4	11	17	58	42	91	112	118	97	56	15	1	0	0	0	0	0	0	0	0	0		2.29989e-12	2.41961e-12	6.01825e-12	5.23333e-12	3.16185e-11	1.09273e-10	9.23273e-10	1.48365e-09	7.61973e-09	2.06038e-08	4.23975e-08	6.49771e-08	7.32667e-08	3.3912e-08	3.59007e-09	0	0	0	0	0	0	0	0	0
239.058	43	36	37	13	27	54	96	59	79	114	94	77	30	1	1	0	0	0	0	0	0	0	0	0		2.41208e-12	4.58453e-12	1.39172e-11	1.70083e-11	7.7609e-11	3.47103e-10	1.52818e-09	2.08418e-09	6.61493e-09	2.09717e-08	3.37743e-08	5.15797e-08	3.925e-08	2.2608e-09	3.59007e-09	0	0	0	0	0	0	0	0	0
240.456	40	26	15	5	13	22	72	58	98	116	123	93	40	3	2	0	0	0	0	0	0	0	0	0		2.24379e-12	3.31105e-12	5.64211e-12	6.54167e-12	3.73673e-11	1.41413e-10	1.14613e-09	2.04885e-09	8.20587e-09	2.13396e-08	4.4194e-08	6.22976e-08	5.23333e-08	6.7824e-09	7.18013e-09	0	0	0	0	0	0	0	0	0
241.854	37	26	14	8	22	40	86	79	138	124	102	85	62	7	0	0	0	0	0	0	0	0	0	0		2.07551e-12	3.31105e-12	5.26597e-12	1.04667e-11	6.3237e-11	2.57114e-10	1.36899e-09	2.79068e-09	1.15552e-08	2.28113e-08	3.66487e-08	5.69387e-08	8.11167e-08	1.58256e-08	0	0	0	0	0	0	0	0	0	0
243.252	33	34	14	7	15	25	87	59	115	110	121	109	45	11	2	0	1	0	0	0	0	0	0	0		1.85113e-12	4.32983e-12	5.26597e-12	9.15833e-12	4.31161e-11	1.60696e-10	1.38491e-09	2.08418e-09	9.62933e-09	2.02358e-08	4.34754e-08	7.30155e-08	5.8875e-08	2.48688e-08	7.18013e-09	0	7.6302e-09	0	0	0	0	0	0	0
244.65	39	24	8	4	9	17	35	37	77	108	145	138	64	12	2	0	0	0	0	0	0	0	0	0		2.1877e-12	3.05635e-12	3.00912e-12	5.23333e-12	2.58697e-11	1.09273e-10	5.57147e-10	1.30703e-09	6.44747e-09	1.98679e-08	5.20987e-08	9.24416e-08	8.37333e-08	2.71296e-08	7.18013e-09	0	0	0	0	0	0	0	0	0
246.048	27	15	13	3	10	20	51	25	74	91	126	132	70	13	2	0	0	0	0	0	0	0	0	0		1.51456e-12	1.91022e-12	4.88983e-12	3.925e-12	2.87441e-11	1.28557e-10	8.11843e-10	8.83125e-10	6.19627e-09	1.67406e-08	4.52719e-08	8.84224e-08	9.15833e-08	2.93904e-08	7.18013e-09	0	0	0	0	0	0	0	0	0
247.446	35	14	16	3	12	13	34	38	68	100	120	151	85	9	3	1	0	0	0	0	0	0	0	0		1.96332e-12	1.78287e-12	6.01825e-12	3.925e-12	3.44929e-11	8.35619e-11	5.41229e-10	1.34235e-09	5.69387e-09	1.83962e-08	4.31161e-08	1.0115e-07	1.11208e-07	2.03472e-08	1.07702e-08	5.35893e-09	0	0	0	0	0	0	0	0
248.844	29	21	16	9	15	35	91	45	95	103	105	124	55	8	3	0	0	0	0	0	0	0	0	0		1.62675e-12	2.67431e-12	6.01825e-12	1.1775e-11	4.31161e-11	2.24974e-10	1.44858e-09	1.58963e-09	7.95467e-09	1.89481e-08	3.77266e-08	8.30635e-08	7.19583e-08	1.80864e-08	1.07702e-08	0	0	0	0	0	0	0	0	0
250.242	21	13	11	11	14	39	119	91	94	119	93	96	57	8	1	0	0	0	0	0	0	0	0	0		1.17799e-12	1.65552e-12	4.13755e-12	1.43917e-11	4.02417e-11	2.50686e-10	1.8943e-09	3.21458e-09	7.87093e-09	2.18915e-08	3.3415e-08	6.43072e-08	7.4575e-08	1.80864e-08	3.59007e-09	0	0	0	0	0	0	0	0	0
251.64	14	7	7	3	10	33	127	160	216	175	75	56	35	6	1	0	0	0	0	0	0	0	0	0		7.85327e-13	8.91436e-13	2.63298e-12	3.925e-12	2.87441e-11	2.12119e-10	2.02165e-09	5.652e-09	1.80864e-08	3.21934e-08	2.69476e-08	3.75125e-08	4.57917e-08	1.35648e-08	3.59007e-09	0	0	0	0	0	0	0	0	0
253.038	53	34	15	6	16	29	113	65	117	118	85	88	21	1	0	0	0	0	0	0	0	0	0	0		2.97302e-12	4.32983e-12	5.64211e-12	7.85e-12	4.59905e-11	1.86407e-10	1.79879e-09	2.29613e-09	9.7968e-09	2.17075e-08	3.05406e-08	5.89483e-08	2.7475e-08	2.2608e-09	0	0	0	0	0	0	0	0	0	0
254.436	40	31	31	12	26	43	95	81	95	112	95	69	43	11	1	0	0	0	0	0	0	0	0	0		2.24379e-12	3.94779e-12	1.16604e-11	1.57e-11	7.47346e-11	2.76397e-10	1.51226e-09	2.86133e-09	7.95467e-09	2.06038e-08	3.41336e-08	4.62208e-08	5.62583e-08	2.48688e-08	3.59007e-09	0	0	0	0	0	0	0	0	0
255.834	49	33	24	11	17	41	78	56	104	131	113	81	40	13	0	0	0	0	0	0	0	0	0	0		2.74864e-12	4.20248e-12	9.02737e-12	1.43917e-11	4.88649e-11	2.63542e-10	1.24164e-09	1.9782e-09	8.70827e-09	2.4099e-08	4.0601e-08	5.42592e-08	5.23333e-08	2.93904e-08	0	0	0	0	0	0	0	0	0	0
257.232	27	31	19	9	10	33	144	105	154	129	91	64	34	9	2	0	0	0	0	0	0	0	0	0		1.51456e-12	3.94779e-12	7.14667e-12	1.1775e-11	2.87441e-11	2.12119e-10	2.29226e-09	3.70913e-09	1.28949e-08	2.37311e-08	3.26964e-08	4.28715e-08	4.44833e-08	2.03472e-08	7.18013e-09	0	0	0	0	0	0	0	0	0
258.63	22	15	13	9	19	44	173	170	227	144	46	20	36	5	1	0	0	0	0	0	0	0	0	0		1.23409e-12	1.91022e-12	4.88983e-12	1.1775e-11	5.46138e-11	2.82825e-10	2.7539e-09	6.00525e-09	1.90075e-08	2.64905e-08	1.65278e-08	1.33973e-08	4.71e-08	1.1304e-08	3.59007e-09	0	0	0	0	0	0	0	0	0
260.028	50	32	22	11	19	39	112	67	104	126	97	81	31	3	0	0	0	0	0	0	0	0	0	0		2.80474e-12	4.07513e-12	8.27509e-12	1.43917e-11	5.46138e-11	2.50686e-10	1.78287e-09	2.36678e-09	8.70827e-09	2.31792e-08	3.48522e-08	5.42592e-08	4.05583e-08	6.7824e-09	0	0	0	0	0	0	0	0	0	0
261.426	51	25	10	5	10	27	70	45	101	138	106	110	34	7	0	0	0	0	0	0	0	0	0	0		2.86083e-12	3.1837e-12	3.76141e-12	6.54167e-12	2.87441e-11	1.73552e-10	1.11429e-09	1.58963e-09	8.45707e-09	2.53868e-08	3.80859e-08	7.36853e-08	4.44833e-08	1.58256e-08	0	0	0	0	0	0	0	0	0	0
262.824	43	19	8	2	6	11	28	31	80	144	153	156	53	10	0	0	0	0	0	0	0	0	0	0		2.41208e-12	2.41961e-12	3.00912e-12	2.61667e-12	1.72465e-11	7.07063e-11	4.45718e-10	1.09508e-09	6.69867e-09	2.64905e-08	5.49731e-08	1.04499e-07	6.93417e-08	2.2608e-08	0	0	0	0	0	0	0	0	0	0
264.222	47	25	10	4	5	14	27	29	90	132	142	103	81	10	0	0	0	0	0	0	0	0	0	0		2.63646e-12	3.1837e-12	3.76141e-12	5.23333e-12	1.4372e-11	8.99898e-11	4.29799e-10	1.02443e-09	7.536e-09	2.4283e-08	5.10207e-08	6.89963e-08	1.05975e-07	2.2608e-08	0	0	0	0	0	0	0	0	0	0
265.62	47	30	13	7	15	12	42	34	101	147	117	118	57	9	2	2	1	0	0	0	0	0	0	0		2.63646e-12	3.82044e-12	4.88983e-12	9.15833e-12	4.31161e-11	7.71341e-11	6.68577e-10	1.20105e-09	8.45707e-09	2.70424e-08	4.20382e-08	7.90443e-08	7.4575e-08	2.03472e-08	7.18013e-09	1.07179e-08	7.6302e-09	0	0	0	0	0	0	0
267.018	51	22	11	6	6	10	25	33	85	130	138	112	58	11	2	0	0	0	0	0	0	0	0	0		2.86083e-12	2.80165e-12	4.13755e-12	7.85e-12	1.72465e-11	6.42784e-11	3.97962e-10	1.16573e-09	7.11733e-09	2.39151e-08	4.95835e-08	7.50251e-08	7.58833e-08	2.48688e-08	7.18013e-09	0	0	0	0	0	0	0	0	0
268.416	50	21	12	3	5	13	34	27	58	113	121	119	53	12	0	0	0	0	0	0	0	0	0	0		2.80474e-12	2.67431e-12	4.51369e-12	3.925e-12	1.4372e-11	8.35619e-11	5.41229e-10	9.53775e-10	4.85653e-09	2.07877e-08	4.34754e-08	7.97141e-08	6.93417e-08	2.71296e-08	0	0	0	0	0	0	0	0	0	0
269.814	46	20	4	3	2	9	27	30	74	122	115	135	60	13	1	0	0	0	0	0	0	0	0	0		2.58036e-12	2.54696e-12	1.50456e-12	3.925e-12	5.74882e-12	5.78506e-11	4.29799e-10	1.05975e-09	6.19627e-09	2.24434e-08	4.13196e-08	9.0432e-08	7.85e-08	2.93904e-08	3.59007e-09	0	0	0	0	0	0	0	0	0
271.212	47	28	4	9	3	10	22	23	64	127	156	123	90	22	2	0	0	0	0	0	0	0	0	0		2.63646e-12	3.56574e-12	1.50456e-12	1.1775e-11	8.62323e-12	6.42784e-11	3.50207e-10	8.12475e-10	5.35893e-09	2.33632e-08	5.6051e-08	8.23936e-08	1.1775e-07	4.97376e-08	7.18013e-09	0	0	0	0	0	0	0	0	0
272.61	48	17	4	2	5	9	22	26	56	115	142	146	74	15	1	0	0	0	0	0	0	0	0	0		2.69255e-12	2.16491e-12	1.50456e-12	2.61667e-12	1.4372e-11	5.78506e-11	3.50207e-10	9.1845e-10	4.68907e-09	2.11556e-08	5.10207e-08	9.78005e-08	9.68167e-08	3.3912e-08	3.59007e-09	0	0	0	0	0	0	0	0	0
274.008	37	9	7	0	1	6	10	20	55	154	157	133	54	10	0	0	0	0	0	0	0	0	0	0		2.07551e-12	1.14613e-12	2.63298e-12	0	2.87441e-12	3.8567e-11	1.59185e-10	7.065e-10	4.60533e-09	2.83302e-08	5.64103e-08	8.90923e-08	7.065e-08	2.2608e-08	0	0	0	0	0	0	0	0	0	0
275.406	32	16	4	3	2	6	26	29	76	137	168	113	47	11	0	0	0	0	0	0	0	0	0	0		1.79503e-12	2.03757e-12	1.50456e-12	3.925e-12	5.74882e-12	3.8567e-11	4.13881e-10	1.02443e-09	6.36373e-09	2.52028e-08	6.03626e-08	7.56949e-08	6.14917e-08	2.48688e-08	0	0	0	0	0	0	0	0	0	0
276.804	34	13	2	1	3	2	11	22	62	156	170	143	29	8	1	0	0	0	0	0	0	0	0	0		1.90722e-12	1.65552e-12	7.52281e-13	1.30833e-12	8.62323e-12	1.28557e-11	1.75103e-10	7.7715e-10	5.19147e-09	2.86981e-08	6.10812e-08	9.57909e-08	3.79417e-08	1.80864e-08	3.59007e-09	0	0	0	0	0	0	0	0	0
278.202	14	7	2	0	4	5	15	24	55	116	106	96	76	3	0	0	0	0	0	0	0	0	0	0		7.85327e-13	8.91436e-13	7.52281e-13	0	1.14976e-11	3.21392e-11	2.38777e-10	8.478e-10	4.60533e-09	2.13396e-08	3.80859e-08	6.43072e-08	9.94333e-08	6.7824e-09	0	0	0	0	0	0	0	0	0	0
279.6	15	5	1	0	2	8	34	41	109	186	134	61	5	0	1	0	0	0	0	0	0	0	0	0		8.41422e-13	6.3674e-13	3.76141e-13	0	5.74882e-12	5.14227e-11	5.41229e-10	1.44833e-09	9.12693e-09	3.4217e-08	4.81463e-08	4.08619e-08	6.54167e-09	0	3.59007e-09	0	0	0	0	0	0	0	0	0
280.998	10	2	0	0	2	7	14	22	88	231	247	156	30	11	1	1	0	0	0	0	0	0	0	0		5.60948e-13	2.54696e-13	0	0	5.74882e-12	4.49949e-11	2.22859e-10	7.7715e-10	7.36853e-09	4.24953e-08	8.87474e-08	1.04499e-07	3.925e-08	2.48688e-08	3.59007e-09	5.35893e-09	0	0	0	0	0	0	0	0
282.396	11	0	0	2	0	11	40	39	118	176	114	31	22	2	0	0	0	0	0	0	0	0	0	0		6.17043e-13	0	0	2.61667e-12	0	7.07063e-11	6.3674e-10	1.37768e-09	9.88053e-09	3.23773e-08	4.09603e-08	2.07659e-08	2.87833e-08	4.5216e-09	0	0	0	0	0	0	0	0	0	0
283.794	24	2	8	2	6	11	55	64	150	191	71	24	1	1	0	0	0	0	0	0	0	0	0	0		1.34627e-12	2.54696e-13	3.00912e-12	2.61667e-12	1.72465e-11	7.07063e-11	8.75517e-10	2.2608e-09	1.256e-08	3.51368e-08	2.55104e-08	1.60768e-08	1.30833e-09	2.2608e-09	0	0	0	0	0	0	0	0	0	0
285.192	9	4	3	1	3	11	38	38	132	166	92	22	1	0	0	0	0	0	0	0	0	0	0	0		5.04853e-13	5.09392e-13	1.12842e-12	1.30833e-12	8.62323e-12	7.07063e-11	6.04903e-10	1.34235e-09	1.10528e-08	3.05377e-08	3.30557e-08	1.47371e-08	1.30833e-09	0	0	0	0	0	0	0	0	0	0	0
286.59	2	1	2	1	4	11	76	88	232	201	49	5	0	1	0	0	0	0	0	0	0	0	0	0		1.1219e-13	1.27348e-13	7.52281e-13	1.30833e-12	1.14976e-11	7.07063e-11	1.20981e-09	3.1086e-09	1.94261e-08	3.69764e-08	1.76058e-08	3.34933e-09	0	2.2608e-09	0	0	0	0	0	0	0	0	0	0
287.988	2	1	4	2	3	10	51	74	192	134	27	3	3	1	0	0	0	0	0	0	0	0	0	0		1.1219e-13	1.27348e-13	1.50456e-12	2.61667e-12	8.62323e-12	6.42784e-11	8.11843e-10	2.61405e-09	1.60768e-08	2.46509e-08	9.70113e-09	2.0096e-09	3.925e-09	2.2608e-09	0	0	0	0	0	0	0	0	0	0
289.386	1	1	5	0	4	23	121	205	341	126	7	0	0	0	0	0	0	0	0	0	0	0	0	0		5.60948e-14	1.27348e-13	1.8807e-12	0	1.14976e-11	1.4784e-10	1.92614e-09	7.24163e-09	2.85531e-08	2.31792e-08	2.51511e-09	0	0	0	0	0	0	0	0	0	0	0	0	0
290.784	1	1	1	3	6	39	250	317	310	41	6	0	0	0	0	0	0	0	0	0	0	0	0	0		5.60948e-14	1.27348e-13	3.76141e-13	3.925e-12	1.72465e-11	2.50686e-10	3.97962e-09	1.1198e-08	2.59573e-08	7.54245e-09	2.15581e-09	0	0	0	0	0	0	0	0	0	0	0	0	0
292.182	9	2	10	8	13	74	344	256	147	22	1	0	0	0	0	0	0	0	0	0	0	0	0	0		5.04853e-13	2.54696e-13	3.76141e-12	1.04667e-11	3.73673e-11	4.7566e-10	5.47596e-09	9.0432e-09	1.23088e-08	4.04717e-09	3.59301e-10	0	0	0	0	0	0	0	0	0	0	0	0	0
293.58	7	11	17	17	27	107	345	197	80	9	3	0	0	0	0	0	0	0	0	0	0	0	0	0		3.92664e-13	1.40083e-12	6.39439e-12	2.22417e-11	7.7609e-11	6.87779e-10	5.49188e-09	6.95903e-09	6.69867e-09	1.65566e-09	1.0779e-09	0	0	0	0	0	0	0	0	0	0	0	0	0
294.978	124	135	111	48	86	91	66	3	2	1	0	0	0	0	0	0	0	0	0	0	0	0	0	0		6.95575e-12	1.7192e-11	4.17516e-11	6.28e-11	2.47199e-10	5.84934e-10	1.05062e-09	1.05975e-10	1.67467e-10	1.83962e-10	0	0	0	0	0	0	0	0	0	0	0	0	0	0
296.376	204	227	149	63	67	42	18	2	0	0	0	0	0	0	0	0	0	0	0	0	0	0	0	0		1.14433e-11	2.8908e-11	5.60449e-11	8.2425e-11	1.92585e-10	2.69969e-10	2.86533e-10	7.065e-11	0	0	0	0	0	0	0	0	0	0	0	0	0	0	0	0
297.774	266	180	84	23	12	6	8	1	1	0	0	0	0	0	0	0	0	0	0	0	0	0	0	0		1.49212e-11	2.29226e-11	3.15958e-11	3.00917e-11	3.44929e-11	3.8567e-11	1.27348e-10	3.5325e-11	8.37333e-11	0	0	0	0	0	0	0	0	0	0	0	0	0	0	0
299.172	304	133	69	12	7	9	2	0	0	0	0	0	0	0	0	0	0	0	0	0	0	0	0	0		1.70528e-11	1.69373e-11	2.59537e-11	1.57e-11	2.01209e-11	5.78506e-11	3.1837e-11	0	0	0	0	0	0	0	0	0	0	0	0	0	0	0	0	0
300.57	348	160	46	8	8	5	2	0	0	0	0	0	0	0	0	0	0	0	0	0	0	0	0	0		1.9521e-11	2.03757e-11	1.73025e-11	1.04667e-11	2.29953e-11	3.21392e-11	3.1837e-11	0	0	0	0	0	0	0	0	0	0	0	0	0	0	0	0	0
301.968	274	88	20	7	0	6	1	0	0	0	0	0	0	0	0	0	0	0	0	0	0	0	0	0		1.537e-11	1.12066e-11	7.52281e-12	9.15833e-12	0	3.8567e-11	1.59185e-11	0	0	0	0	0	0	0	0	0	0	0	0	0	0	0	0	0
303.366	274	81	21	5	4	0	1	0	0	0	0	0	0	0	0	0	0	0	0	0	0	0	0	0		1.537e-11	1.03152e-11	7.89895e-12	6.54167e-12	1.14976e-11	0	1.59185e-11	0	0	0	0	0	0	0	0	0	0	0	0	0	0	0	0	0
304.764	238	63	18	3	5	2	1	0	0	0	0	0	0	0	0	0	0	0	0	0	0	0	0	0		1.33506e-11	8.02292e-12	6.77053e-12	3.925e-12	1.4372e-11	1.28557e-11	1.59185e-11	0	0	0	0	0	0	0	0	0	0	0	0	0	0	0	0	0
306.162	179	39	16	1	8	4	3	0	1	0	0	0	0	0	0	0	0	0	0	0	0	0	0	0		1.0041e-11	4.96657e-12	6.01825e-12	1.30833e-12	2.29953e-11	2.57114e-11	4.77555e-11	0	8.37333e-11	0	0	0	0	0	0	0	0	0	0	0	0	0	0	0
307.56	182	55	16	6	4	0	0	0	0	0	0	0	0	0	0	0	0	0	0	0	0	0	0	0		1.02093e-11	7.00414e-12	6.01825e-12	7.85e-12	1.14976e-11	0	0	0	0	0	0	0	0	0	0	0	0	0	0	0	0	0	0	0
308.958	150	41	12	3	2	1	1	0	0	0	0	0	0	0	0	0	0	0	0	0	0	0	0	0		8.41422e-12	5.22127e-12	4.51369e-12	3.925e-12	5.74882e-12	6.42784e-12	1.59185e-11	0	0	0	0	0	0	0	0	0	0	0	0	0	0	0	0	0
310.356	192	60	26	2	3	1	2	0	0	0	0	0	0	0	0	0	0	0	0	0	0	0	0	0		1.07702e-11	7.64088e-12	9.77966e-12	2.61667e-12	8.62323e-12	6.42784e-12	3.1837e-11	0	0	0	0	0	0	0	0	0	0	0	0	0	0	0	0	0
311.754	189	46	13	1	2	1	2	0	0	0	0	0	0	0	0	0	0	0	0	0	0	0	0	0		1.06019e-11	5.858e-12	4.88983e-12	1.30833e-12	5.74882e-12	6.42784e-12	3.1837e-11	0	0	0	0	0	0	0	0	0	0	0	0	0	0	0	0	0
313.152	123	29	7	2	4	1	2	0	0	0	0	0	0	0	0	0	0	0	0	0	0	0	0	0		6.89966e-12	3.69309e-12	2.63298e-12	2.61667e-12	1.14976e-11	6.42784e-12	3.1837e-11	0	0	0	0	0	0	0	0	0	0	0	0	0	0	0	0	0
314.55	136	16	10	1	2	2	0	0	0	0	0	0	0	0	0	0	0	0	0	0	0	0	0	0		7.62889e-12	2.03757e-12	3.76141e-12	1.30833e-12	5.74882e-12	1.28557e-11	0	0	0	0	0	0	0	0	0	0	0	0	0	0	0	0	0	0
315.948	180	41	8	3	2	2	0	0	0	0	0	0	0	0	0	0	0	0	0	0	0	0	0	0		1.00971e-11	5.22127e-12	3.00912e-12	3.925e-12	5.74882e-12	1.28557e-11	0	0	0	0	0	0	0	0	0	0	0	0	0	0	0	0	0	0
317.346	165	35	16	4	2	1	3	0	0	0	0	0	0	0	0	0	0	0	0	0	0	0	0	0		9.25564e-12	4.45718e-12	6.01825e-12	5.23333e-12	5.74882e-12	6.42784e-12	4.77555e-11	0	0	0	0	0	0	0	0	0	0	0	0	0	0	0	0	0
318.744	154	37	8	1	0	0	0	0	0	0	0	0	0	0	0	0	0	0	0	0	0	0	0	0		8.6386e-12	4.71187e-12	3.00912e-12	1.30833e-12	0	0	0	0	0	0	0	0	0	0	0	0	0	0	0	0	0	0	0	0
320.142	177	45	7	4	2	1	1	0	1	0	0	0	0	0	0	0	0	0	0	0	0	0	0	0		9.92878e-12	5.73066e-12	2.63298e-12	5.23333e-12	5.74882e-12	6.42784e-12	1.59185e-11	0	8.37333e-11	0	0	0	0	0	0	0	0	0	0	0	0	0	0	0
321.54	197	25	10	5	2	1	1	0	0	0	0	0	0	0	0	0	0	0	0	0	0	0	0	0		1.10507e-11	3.1837e-12	3.76141e-12	6.54167e-12	5.74882e-12	6.42784e-12	1.59185e-11	0	0	0	0	0	0	0	0	0	0	0	0	0	0	0	0	0
322.938	153	26	15	7	0	0	1	0	0	0	0	0	0	0	0	0	0	0	0	0	0	0	0	0		8.5825e-12	3.31105e-12	5.64211e-12	9.15833e-12	0	0	1.59185e-11	0	0	0	0	0	0	0	0	0	0	0	0	0	0	0	0	0
324.336	147	33	10	3	1	2	0	0	0	0	0	0	0	0	0	0	0	0	0	0	0	0	0	0		8.24593e-12	4.20248e-12	3.76141e-12	3.925e-12	2.87441e-12	1.28557e-11	0	0	0	0	0	0	0	0	0	0	0	0	0	0	0	0	0	0
325.734	146	45	9	1	1	1	2	0	0	0	0	0	0	0	0	0	0	0	0	0	0	0	0	0		8.18984e-12	5.73066e-12	3.38527e-12	1.30833e-12	2.87441e-12	6.42784e-12	3.1837e-11	0	0	0	0	0	0	0	0	0	0	0	0	0	0	0	0	0
327.132	170	33	13	3	1	1	0	0	0	0	0	0	0	0	0	0	0	0	0	0	0	0	0	0		9.53611e-12	4.20248e-12	4.88983e-12	3.925e-12	2.87441e-12	6.42784e-12	0	0	0	0	0	0	0	0	0	0	0	0	0	0	0	0	0	0
328.53	128	29	5	1	5	3	2	0	0	0	0	0	0	0	0	0	0	0	0	0	0	0	0	0		7.18013e-12	3.69309e-12	1.8807e-12	1.30833e-12	1.4372e-11	1.92835e-11	3.1837e-11	0	0	0	0	0	0	0	0	0	0	0	0	0	0	0	0	0
329.928	169	39	6	2	2	3	1	0	0	0	0	0	0	0	0	0	0	0	0	0	0	0	0	0		9.48002e-12	4.96657e-12	2.25684e-12	2.61667e-12	5.74882e-12	1.92835e-11	1.59185e-11	0	0	0	0	0	0	0	0	0	0	0	0	0	0	0	0	0
331.326	234	52	19	3	4	3	1	0	0	1	0	0	0	0	0	0	0	0	0	0	0	0	0	0		1.31262e-11	6.62209e-12	7.14667e-12	3.925e-12	1.14976e-11	1.92835e-11	1.59185e-11	0	0	1.83962e-10	0	0	0	0	0	0	0	0	0	0	0	0	0	0
332.724	144	49	32	8	14	4	1	0	0	0	0	0	0	0	0	0	0	0	0	0	0	0	0	0		8.07765e-12	6.24005e-12	1.20365e-11	1.04667e-11	4.02417e-11	2.57114e-11	1.59185e-11	0	0	0	0	0	0	0	0	0	0	0	0	0	0	0	0	0
334.122	164	33	11	4	1	2	0	0	0	0	0	0	0	0	0	0	0	0	0	0	0	0	0	0		9.19955e-12	4.20248e-12	4.13755e-12	5.23333e-12	2.87441e-12	1.28557e-11	0	0	0	0	0	0	0	0	0	0	0	0	0	0	0	0	0	0
335.52	161	27	8	3	0	1	0	1	0	0	0	0	0	0	0	0	0	0	0	0	0	0	0	0		9.03126e-12	3.43839e-12	3.00912e-12	3.925e-12	0	6.42784e-12	0	3.5325e-11	0	0	0	0	0	0	0	0	0	0	0	0	0	0	0	0
336.918	153	27	16	4	2	4	2	0	0	0	0	0	0	0	0	0	0	0	0	0	0	0	0	0		8.5825e-12	3.43839e-12	6.01825e-12	5.23333e-12	5.74882e-12	2.57114e-11	3.1837e-11	0	0	0	0	0	0	0	0	0	0	0	0	0	0	0	0	0
338.316	186	39	16	3	0	0	3	0	1	0	0	0	0	0	0	0	0	0	0	0	0	0	0	0		1.04336e-11	4.96657e-12	6.01825e-12	3.925e-12	0	0	4.77555e-11	0	8.37333e-11	0	0	0	0	0	0	0	0	0	0	0	0	0	0	0
339.714	206	57	15	2	3	4	3	0	0	0	0	0	0	0	0	0	0	0	0	0	0	0	0	0		1.15555e-11	7.25883e-12	5.64211e-12	2.61667e-12	8.62323e-12	2.57114e-11	4.77555e-11	0	0	0	0	0	0	0	0	0	0	0	0	0	0	0	0	0
341.112	199	40	19	4	2	0	1	0	0	0	0	0	0	0	0	0	0	0	0	0	0	0	0	0		1.11629e-11	5.09392e-12	7.14667e-12	5.23333e-12	5.74882e-12	0	1.59185e-11	0	0	0	0	0	0	0	0	0	0	0	0	0	0	0	0	0
342.51	198	41	15	1	4	1	1	0	0	0	0	0	0	0	0	0	0	0	0	0	0	0	0	0		1.11068e-11	5.22127e-12	5.64211e-12	1.30833e-12	1.14976e-11	6.42784e-12	1.59185e-11	0	0	0	0	0	0	0	0	0	0	0	0	0	0	0	0	0
343.908	202	56	19	6	7	1	1	0	0	0	0	0	0	0	0	0	0	0	0	0	0	0	0	0		1.13311e-11	7.13148e-12	7.14667e-12	7.85e-12	2.01209e-11	6.42784e-12	1.59185e-11	0	0	0	0	0	0	0	0	0	0	0	0	0	0	0	0	0
345.306	197	39	12	1	4	3	2	0	0	0	0	0	0	0	0	0	0	0	0	0	0	0	0	0		1.10507e-11	4.96657e-12	4.51369e-12	1.30833e-12	1.14976e-11	1.92835e-11	3.1837e-11	0	0	0	0	0	0	0	0	0	0	0	0	0	0	0	0	0
346.704	182	42	11	3	1	0	1	0	0	0	0	0	0	0	0	0	0	0	0	0	0	0	0	0		1.02093e-11	5.34861e-12	4.13755e-12	3.925e-12	2.87441e-12	0	1.59185e-11	0	0	0	0	0	0	0	0	0	0	0	0	0	0	0	0	0
348.102	180	38	7	4	3	0	1	0	0	0	0	0	0	0	0	0	0	0	0	0	0	0	0	0		1.00971e-11	4.83922e-12	2.63298e-12	5.23333e-12	8.62323e-12	0	1.59185e-11	0	0	0	0	0	0	0	0	0	0	0	0	0	0	0	0	0
349.5	186	41	13	3	4	3	1	0	0	0	0	0	0	0	0	0	0	0	0	0	0	0	0	0		1.04336e-11	5.22127e-12	4.88983e-12	3.925e-12	1.14976e-11	1.92835e-11	1.59185e-11	0	0	0	0	0	0	0	0	0	0	0	0	0	0	0	0	0
350.898	157	34	6	6	1	1	0	0	0	0	0	0	0	0	0	0	0	0	0	0	0	0	0	0		8.80688e-12	4.32983e-12	2.25684e-12	7.85e-12	2.87441e-12	6.42784e-12	0	0	0	0	0	0	0	0	0	0	0	0	0	0	0	0	0	0
352.296	177	39	10	5	3	2	1	0	0	0	0	0	0	0	0	0	0	0	0	0	0	0	0	0		9.92878e-12	4.96657e-12	3.76141e-12	6.54167e-12	8.62323e-12	1.28557e-11	1.59185e-11	0	0	0	0	0	0	0	0	0	0	0	0	0	0	0	0	0
353.694	160	30	12	5	3	3	0	0	0	0	0	0	0	0	0	0	0	0	0	0	0	0	0	0		8.97517e-12	3.82044e-12	4.51369e-12	6.54167e-12	8.62323e-12	1.92835e-11	0	0	0	0	0	0	0	0	0	0	0	0	0	0	0	0	0	0
355.092	146	35	8	4	1	1	1	0	0	0	0	0	0	0	0	0	0	0	0	0	0	0	0	0		8.18984e-12	4.45718e-12	3.00912e-12	5.23333e-12	2.87441e-12	6.42784e-12	1.59185e-11	0	0	0	0	0	0	0	0	0	0	0	0	0	0	0	0	0
356.49	157	33	6	1	5	0	1	1	0	0	0	0	0	0	0	0	0	0	0	0	0	0	0	0		8.80688e-12	4.20248e-12	2.25684e-12	1.30833e-12	1.4372e-11	0	1.59185e-11	3.5325e-11	0	0	0	0	0	0	0	0	0	0	0	0	0	0	0	0
357.888	195	57	16	0	0	4	1	0	0	1	0	0	0	0	0	0	0	0	0	0	0	0	0	0		1.09385e-11	7.25883e-12	6.01825e-12	0	0	2.57114e-11	1.59185e-11	0	0	1.83962e-10	0	0	0	0	0	0	0	0	0	0	0	0	0	0
359.286	173	38	13	3	4	2	1	1	0	0	0	0	0	0	0	0	0	0	0	0	0	0	0	0		9.7044e-12	4.83922e-12	4.88983e-12	3.925e-12	1.14976e-11	1.28557e-11	1.59185e-11	3.5325e-11	0	0	0	0	0	0	0	0	0	0	0	0	0	0	0	0
360.684	170	27	14	3	4	0	0	0	0	0	0	0	0	0	0	0	0	0	0	0	0	0	0	0		9.53611e-12	3.43839e-12	5.26597e-12	3.925e-12	1.14976e-11	0	0	0	0	0	0	0	0	0	0	0	0	0	0	0	0	0	0	0
362.082	144	41	9	4	3	2	2	0	1	0	0	0	0	0	0	0	0	0	0	0	0	0	0	0		8.07765e-12	5.22127e-12	3.38527e-12	5.23333e-12	8.62323e-12	1.28557e-11	3.1837e-11	0	8.37333e-11	0	0	0	0	0	0	0	0	0	0	0	0	0	0	0
363.48	158	35	8	1	1	3	0	0	0	0	0	0	0	0	0	0	0	0	0	0	0	0	0	0		8.86298e-12	4.45718e-12	3.00912e-12	1.30833e-12	2.87441e-12	1.92835e-11	0	0	0	0	0	0	0	0	0	0	0	0	0	0	0	0	0	0
364.878	143	29	15	4	2	1	0	1	0	0	0	0	0	0	0	0	0	0	0	0	0	0	0	0		8.02156e-12	3.69309e-12	5.64211e-12	5.23333e-12	5.74882e-12	6.42784e-12	0	3.5325e-11	0	0	0	0	0	0	0	0	0	0	0	0	0	0	0	0
366.276	188	31	6	2	0	2	2	0	0	0	0	0	0	0	0	0	0	0	0	0	0	0	0	0		1.05458e-11	3.94779e-12	2.25684e-12	2.61667e-12	0	1.28557e-11	3.1837e-11	0	0	0	0	0	0	0	0	0	0	0	0	0	0	0	0	0
367.674	153	28	5	1	2	2	0	0	1	0	1	0	0	0	0	0	0	0	0	0	0	0	0	0		8.5825e-12	3.56574e-12	1.8807e-12	1.30833e-12	5.74882e-12	1.28557e-11	0	0	8.37333e-11	0	3.59301e-10	0	0	0	0	0	0	0	0	0	0	0	0	0
369.072	164	27	10	3	2	2	1	0	0	0	0	0	0	0	0	0	0	0	0	0	0	0	0	0		9.19955e-12	3.43839e-12	3.76141e-12	3.925e-12	5.74882e-12	1.28557e-11	1.59185e-11	0	0	0	0	0	0	0	0	0	0	0	0	0	0	0	0	0
370.47	160	40	17	1	3	1	2	0	0	0	0	0	0	0	0	0	0	0	0	0	0	0	0	0		8.97517e-12	5.09392e-12	6.39439e-12	1.30833e-12	8.62323e-12	6.42784e-12	3.1837e-11	0	0	0	0	0	0	0	0	0	0	0	0	0	0	0	0	0
371.868	163	30	12	3	1	4	1	0	0	0	0	0	0	0	0	0	0	0	0	0	0	0	0	0		9.14345e-12	3.82044e-12	4.51369e-12	3.925e-12	2.87441e-12	2.57114e-11	1.59185e-11	0	0	0	0	0	0	0	0	0	0	0	0	0	0	0	0	0
373.266	171	34	13	2	3	5	0	0	0	0	0	0	0	0	0	0	0	0	0	0	0	0	0	0		9.59221e-12	4.32983e-12	4.88983e-12	2.61667e-12	8.62323e-12	3.21392e-11	0	0	0	0	0	0	0	0	0	0	0	0	0	0	0	0	0	0
374.664	151	34	10	5	2	1	2	0	0	0	0	0	0	0	0	0	0	0	0	0	0	0	0	0		8.47031e-12	4.32983e-12	3.76141e-12	6.54167e-12	5.74882e-12	6.42784e-12	3.1837e-11	0	0	0	0	0	0	0	0	0	0	0	0	0	0	0	0	0
376.062	165	29	5	4	2	2	0	0	1	0	0	0	0	0	0	0	0	0	0	0	0	0	0	0		9.25564e-12	3.69309e-12	1.8807e-12	5.23333e-12	5.74882e-12	1.28557e-11	0	0	8.37333e-11	0	0	0	0	0	0	0	0	0	0	0	0	0	0	0
377.46	160	44	7	0	3	2	0	0	0	0	0	0	0	1	0	0	0	0	0	0	0	0	0	0		8.97517e-12	5.60331e-12	2.63298e-12	0	8.62323e-12	1.28557e-11	0	0	0	0	0	0	0	2.2608e-09	0	0	0	0	0	0	0	0	0	0
378.858	193	25	8	0	1	1	0	0	0	0	0	1	0	0	0	0	0	0	0	0	0	0	0	0		1.08263e-11	3.1837e-12	3.00912e-12	0	2.87441e-12	6.42784e-12	0	0	0	0	0	6.69867e-10	0	0	0	0	0	0	0	0	0	0	0	0
380.256	160	28	10	1	0	3	4	0	0	0	0	0	0	0	0	0	0	0	0	0	0	0	0	0		8.97517e-12	3.56574e-12	3.76141e-12	1.30833e-12	0	1.92835e-11	6.3674e-11	0	0	0	0	0	0	0	0	0	0	0	0	0	0	0	0	0
381.654	173	41	11	1	3	1	1	0	0	0	0	0	0	0	0	0	0	0	0	0	0	0	0	0		9.7044e-12	5.22127e-12	4.13755e-12	1.30833e-12	8.62323e-12	6.42784e-12	1.59185e-11	0	0	0	0	0	0	0	0	0	0	0	0	0	0	0	0	0
383.052	138	35	9	1	2	1	4	0	0	0	0	0	0	0	0	0	0	0	0	0	0	0	0	0		7.74108e-12	4.45718e-12	3.38527e-12	1.30833e-12	5.74882e-12	6.42784e-12	6.3674e-11	0	0	0	0	0	0	0	0	0	0	0	0	0	0	0	0	0
384.45	144	24	11	2	2	1	1	0	0	0	0	0	0	0	0	0	0	0	0	0	0	0	0	0		8.07765e-12	3.05635e-12	4.13755e-12	2.61667e-12	5.74882e-12	6.42784e-12	1.59185e-11	0	0	0	0	0	0	0	0	0	0	0	0	0	0	0	0	0
385.848	181	38	13	1	1	1	0	0	0	0	0	0	0	0	0	0	0	0	0	0	0	0	0	0		1.01532e-11	4.83922e-12	4.88983e-12	1.30833e-12	2.87441e-12	6.42784e-12	0	0	0	0	0	0	0	0	0	0	0	0	0	0	0	0	0	0
387.246	113	20	10	2	2	2	2	1	0	0	0	0	0	0	0	0	0	0	0	0	0	0	0	0		6.33871e-12	2.54696e-12	3.76141e-12	2.61667e-12	5.74882e-12	1.28557e-11	3.1837e-11	3.5325e-11	0	0	0	0	0	0	0	0	0	0	0	0	0	0	0	0
388.644	139	29	7	3	0	4	2	0	1	0	0	0	0	0	0	0	0	0	0	0	0	0	0	0		7.79718e-12	3.69309e-12	2.63298e-12	3.925e-12	0	2.57114e-11	3.1837e-11	0	8.37333e-11	0	0	0	0	0	0	0	0	0	0	0	0	0	0	0
390.042	151	42	5	0	1	2	1	0	0	0	0	0	0	0	0	0	0	0	0	0	0	0	0	0		8.47031e-12	5.34861e-12	1.8807e-12	0	2.87441e-12	1.28557e-11	1.59185e-11	0	0	0	0	0	0	0	0	0	0	0	0	0	0	0	0	0
391.44	152	29	12	1	1	0	0	1	0	0	0	0	0	0	0	0	0	0	0	0	0	0	0	0		8.52641e-12	3.69309e-12	4.51369e-12	1.30833e-12	2.87441e-12	0	0	3.5325e-11	0	0	0	0	0	0	0	0	0	0	0	0	0	0	0	0
392.838	128	20	8	1	3	1	3	0	0	0	0	0	0	0	0	0	0	0	0	0	0	0	0	0		7.18013e-12	2.54696e-12	3.00912e-12	1.30833e-12	8.62323e-12	6.42784e-12	4.77555e-11	0	0	0	0	0	0	0	0	0	0	0	0	0	0	0	0	0
394.236	157	26	10	2	2	3	2	0	0	0	0	0	0	0	0	0	0	0	0	0	0	0	0	0		8.80688e-12	3.31105e-12	3.76141e-12	2.61667e-12	5.74882e-12	1.92835e-11	3.1837e-11	0	0	0	0	0	0	0	0	0	0	0	0	0	0	0	0	0
395.634	134	24	19	3	1	0	0	1	0	0	0	0	0	0	0	0	0	0	0	0	0	0	0	0		7.5167e-12	3.05635e-12	7.14667e-12	3.925e-12	2.87441e-12	0	0	3.5325e-11	0	0	0	0	0	0	0	0	0	0	0	0	0	0	0	0
397.032	174	29	8	1	1	1	1	0	0	0	0	0	0	0	0	0	0	0	0	0	0	0	0	0		9.76049e-12	3.69309e-12	3.00912e-12	1.30833e-12	2.87441e-12	6.42784e-12	1.59185e-11	0	0	0	0	0	0	0	0	0	0	0	0	0	0	0	0	0
398.43	139	28	3	2	2	4	1	0	1	0	0	0	0	0	0	0	0	0	0	0	0	0	0	0		7.79718e-12	3.56574e-12	1.12842e-12	2.61667e-12	5.74882e-12	2.57114e-11	1.59185e-11	0	8.37333e-11	0	0	0	0	0	0	0	0	0	0	0	0	0	0	0
399.828	138	27	11	2	5	3	1	0	1	0	0	0	0	0	0	0	0	0	0	0	0	0	0	0		7.74108e-12	3.43839e-12	4.13755e-12	2.61667e-12	1.4372e-11	1.92835e-11	1.59185e-11	0	8.37333e-11	0	0	0	0	0	0	0	0	0	0	0	0	0	0	0
401.226	138	21	11	2	1	2	0	0	0	0	0	0	0	0	0	0	0	0	0	0	0	0	0	0		7.74108e-12	2.67431e-12	4.13755e-12	2.61667e-12	2.87441e-12	1.28557e-11	0	0	0	0	0	0	0	0	0	0	0	0	0	0	0	0	0	0
402.624	140	20	11	0	0	0	0	0	0	0	0	0	0	0	0	0	0	0	0	0	0	0	0	0		7.85327e-12	2.54696e-12	4.13755e-12	0	0	0	0	0	0	0	0	0	0	0	0	0	0	0	0	0	0	0	0	0
404.022	118	26	7	0	1	2	0	0	0	0	0	0	0	0	0	0	0	0	0	0	0	0	0	0		6.61919e-12	3.31105e-12	2.63298e-12	0	2.87441e-12	1.28557e-11	0	0	0	0	0	0	0	0	0	0	0	0	0	0	0	0	0	0
405.42	128	14	9	0	1	1	0	0	0	0	0	0	0	0	0	0	0	0	0	0	0	0	0	0		7.18013e-12	1.78287e-12	3.38527e-12	0	2.87441e-12	6.42784e-12	0	0	0	0	0	0	0	0	0	0	0	0	0	0	0	0	0	0
406.818	143	22	9	3	2	1	1	0	0	0	0	0	0	0	0	0	0	0	0	0	0	0	0	0		8.02156e-12	2.80165e-12	3.38527e-12	3.925e-12	5.74882e-12	6.42784e-12	1.59185e-11	0	0	0	0	0	0	0	0	0	0	0	0	0	0	0	0	0
408.216	117	25	8	2	2	1	1	0	2	0	0	0	0	0	0	0	0	0	0	0	0	0	0	0		6.56309e-12	3.1837e-12	3.00912e-12	2.61667e-12	5.74882e-12	6.42784e-12	1.59185e-11	0	1.67467e-10	0	0	0	0	0	0	0	0	0	0	0	0	0	0	0
409.614	161	35	11	3	1	3	1	0	0	0	0	0	0	0	0	0	0	0	0	0	0	0	0	0		9.03126e-12	4.45718e-12	4.13755e-12	3.925e-12	2.87441e-12	1.92835e-11	1.59185e-11	0	0	0	0	0	0	0	0	0	0	0	0	0	0	0	0	0
411.012	105	23	5	1	2	0	1	0	0	0	0	0	0	0	0	0	0	0	0	0	0	0	0	0		5.88995e-12	2.929e-12	1.8807e-12	1.30833e-12	5.74882e-12	0	1.59185e-11	0	0	0	0	0	0	0	0	0	0	0	0	0	0	0	0	0
412.41	150	29	5	0	3	1	0	0	0	0	0	0	0	0	0	0	0	0	0	0	0	0	0	0		8.41422e-12	3.69309e-12	1.8807e-12	0	8.62323e-12	6.42784e-12	0	0	0	0	0	0	0	0	0	0	0	0	0	0	0	0	0	0
413.808	159	35	7	5	1	2	0	0	0	0	1	0	0	0	0	0	0	0	0	0	0	0	0	0		8.91907e-12	4.45718e-12	2.63298e-12	6.54167e-12	2.87441e-12	1.28557e-11	0	0	0	0	3.59301e-10	0	0	0	0	0	0	0	0	0	0	0	0	0
415.206	156	25	7	3	1	1	0	0	1	0	0	0	0	0	0	0	0	0	0	0	0	0	0	0		8.75079e-12	3.1837e-12	2.63298e-12	3.925e-12	2.87441e-12	6.42784e-12	0	0	8.37333e-11	0	0	0	0	0	0	0	0	0	0	0	0	0	0	0
416.604	135	22	7	1	1	2	1	0	0	0	0	0	0	0	0	0	0	0	0	0	0	0	0	0		7.5728e-12	2.80165e-12	2.63298e-12	1.30833e-12	2.87441e-12	1.28557e-11	1.59185e-11	0	0	0	0	0	0	0	0	0	0	0	0	0	0	0	0	0
418.002	129	29	8	3	4	2	1	0	0	0	0	0	0	0	0	0	0	0	0	0	0	0	0	0		7.23623e-12	3.69309e-12	3.00912e-12	3.925e-12	1.14976e-11	1.28557e-11	1.59185e-11	0	0	0	0	0	0	0	0	0	0	0	0	0	0	0	0	0
419.4	128	16	7	3	1	3	1	0	0	0	0	0	0	0	0	0	0	0	0	0	0	0	0	0		7.18013e-12	2.03757e-12	2.63298e-12	3.925e-12	2.87441e-12	1.92835e-11	1.59185e-11	0	0	0	0	0	0	0	0	0	0	0	0	0	0	0	0	0
420.798	118	28	12	2	0	1	1	0	0	0	0	0	0	0	0	0	0	0	0	0	0	0	0	0		6.61919e-12	3.56574e-12	4.51369e-12	2.61667e-12	0	6.42784e-12	1.59185e-11	0	0	0	0	0	0	0	0	0	0	0	0	0	0	0	0	0
422.196	146	29	13	0	2	0	0	0	0	0	0	0	0	0	0	0	0	0	0	0	0	0	0	0		8.18984e-12	3.69309e-12	4.88983e-12	0	5.74882e-12	0	0	0	0	0	0	0	0	0	0	0	0	0	0	0	0	0	0	0
423.594	160	28	4	2	6	1	0	0	0	0	0	0	0	0	0	0	0	0	0	0	0	0	0	0		8.97517e-12	3.56574e-12	1.50456e-12	2.61667e-12	1.72465e-11	6.42784e-12	0	0	0	0	0	0	0	0	0	0	0	0	0	0	0	0	0	0
424.992	173	18	11	3	2	1	0	0	1	0	0	0	0	0	0	0	0	0	0	0	0	0	0	0		9.7044e-12	2.29226e-12	4.13755e-12	3.925e-12	5.74882e-12	6.42784e-12	0	0	8.37333e-11	0	0	0	0	0	0	0	0	0	0	0	0	0	0	0
426.39	128	25	7	1	1	2	0	0	0	0	0	0	0	0	0	0	0	0	0	0	0	0	0	0		7.18013e-12	3.1837e-12	2.63298e-12	1.30833e-12	2.87441e-12	1.28557e-11	0	0	0	0	0	0	0	0	0	0	0	0	0	0	0	0	0	0
427.788	126	18	8	0	0	0	0	0	0	0	0	1	0	0	0	0	0	0	0	0	0	0	0	0		7.06794e-12	2.29226e-12	3.00912e-12	0	0	0	0	0	0	0	0	6.69867e-10	0	0	0	0	0	0	0	0	0	0	0	0
429.186	128	18	6	1	2	1	0	0	0	0	0	0	0	0	0	0	0	0	0	0	0	0	0	0		7.18013e-12	2.29226e-12	2.25684e-12	1.30833e-12	5.74882e-12	6.42784e-12	0	0	0	0	0	0	0	0	0	0	0	0	0	0	0	0	0	0
430.584	181	38	8	4	1	2	2	1	0	0	0	0	0	0	0	0	0	0	0	0	0	0	0	0		1.01532e-11	4.83922e-12	3.00912e-12	5.23333e-12	2.87441e-12	1.28557e-11	3.1837e-11	3.5325e-11	0	0	0	0	0	0	0	0	0	0	0	0	0	0	0	0
431.982	151	16	12	3	3	0	2	0	0	0	0	0	0	0	0	0	0	0	0	0	0	0	0	0		8.47031e-12	2.03757e-12	4.51369e-12	3.925e-12	8.62323e-12	0	3.1837e-11	0	0	0	0	0	0	0	0	0	0	0	0	0	0	0	0	0
433.38	127	20	10	3	1	2	2	0	0	0	0	0	0	0	0	0	0	0	0	0	0	0	0	0		7.12404e-12	2.54696e-12	3.76141e-12	3.925e-12	2.87441e-12	1.28557e-11	3.1837e-11	0	0	0	0	0	0	0	0	0	0	0	0	0	0	0	0	0
434.778	114	18	9	5	3	2	0	1	0	0	0	0	0	0	0	0	0	0	0	0	0	0	0	0		6.39481e-12	2.29226e-12	3.38527e-12	6.54167e-12	8.62323e-12	1.28557e-11	0	3.5325e-11	0	0	0	0	0	0	0	0	0	0	0	0	0	0	0	0
436.176	121	14	14	0	1	1	0	0	0	0	0	0	0	0	0	0	0	0	0	0	0	0	0	0		6.78747e-12	1.78287e-12	5.26597e-12	0	2.87441e-12	6.42784e-12	0	0	0	0	0	0	0	0	0	0	0	0	0	0	0	0	0	0
437.574	125	25	7	2	1	2	1	0	0	0	0	0	0	0	0	0	0	0	0	0	0	0	0	0		7.01185e-12	3.1837e-12	2.63298e-12	2.61667e-12	2.87441e-12	1.28557e-11	1.59185e-11	0	0	0	0	0	0	0	0	0	0	0	0	0	0	0	0	0
438.972	110	24	8	0	2	1	0	0	0	0	0	0	0	0	0	0	0	0	0	0	0	0	0	0		6.17043e-12	3.05635e-12	3.00912e-12	0	5.74882e-12	6.42784e-12	0	0	0	0	0	0	0	0	0	0	0	0	0	0	0	0	0	0
440.37	151	25	10	1	4	1	4	0	1	0	0	0	0	0	0	0	0	0	0	0	0	0	0	0		8.47031e-12	3.1837e-12	3.76141e-12	1.30833e-12	1.14976e-11	6.42784e-12	6.3674e-11	0	8.37333e-11	0	0	0	0	0	0	0	0	0	0	0	0	0	0	0
441.768	106	21	6	2	0	0	2	0	0	0	0	0	0	0	0	0	0	0	0	0	0	0	0	0		5.94605e-12	2.67431e-12	2.25684e-12	2.61667e-12	0	0	3.1837e-11	0	0	0	0	0	0	0	0	0	0	0	0	0	0	0	0	0
443.166	132	30	9	2	8	0	0	0	0	0	0	0	0	0	0	0	0	0	0	0	0	0	0	0		7.40451e-12	3.82044e-12	3.38527e-12	2.61667e-12	2.29953e-11	0	0	0	0	0	0	0	0	0	0	0	0	0	0	0	0	0	0	0
444.564	173	31	16	2	4	2	1	0	0	0	1	0	0	0	0	0	0	0	0	0	0	0	0	0		9.7044e-12	3.94779e-12	6.01825e-12	2.61667e-12	1.14976e-11	1.28557e-11	1.59185e-11	0	0	0	3.59301e-10	0	0	0	0	0	0	0	0	0	0	0	0	0
445.962	157	26	4	2	3	1	0	0	0	0	0	0	0	0	0	0	0	0	0	0	0	0	0	0		8.80688e-12	3.31105e-12	1.50456e-12	2.61667e-12	8.62323e-12	6.42784e-12	0	0	0	0	0	0	0	0	0	0	0	0	0	0	0	0	0	0
447.36	154	25	10	0	2	1	0	0	0	0	0	0	0	0	0	0	0	0	0	0	0	0	0	0		8.6386e-12	3.1837e-12	3.76141e-12	0	5.74882e-12	6.42784e-12	0	0	0	0	0	0	0	0	0	0	0	0	0	0	0	0	0	0
448.758	111	20	8	4	4	1	0	0	0	0	0	0	0	0	0	0	0	0	0	0	0	0	0	0		6.22652e-12	2.54696e-12	3.00912e-12	5.23333e-12	1.14976e-11	6.42784e-12	0	0	0	0	0	0	0	0	0	0	0	0	0	0	0	0	0	0
450.156	152	28	11	2	0	2	1	0	0	0	0	0	0	0	0	0	0	0	0	0	0	0	0	0		8.52641e-12	3.56574e-12	4.13755e-12	2.61667e-12	0	1.28557e-11	1.59185e-11	0	0	0	0	0	0	0	0	0	0	0	0	0	0	0	0	0
451.554	138	24	12	3	3	2	2	0	0	0	0	1	0	0	0	0	0	0	0	0	0	0	0	0		7.74108e-12	3.05635e-12	4.51369e-12	3.925e-12	8.62323e-12	1.28557e-11	3.1837e-11	0	0	0	0	6.69867e-10	0	0	0	0	0	0	0	0	0	0	0	0
452.952	150	37	13	4	2	1	0	0	0	0	0	0	0	0	0	0	0	0	0	0	0	0	0	0		8.41422e-12	4.71187e-12	4.88983e-12	5.23333e-12	5.74882e-12	6.42784e-12	0	0	0	0	0	0	0	0	0	0	0	0	0	0	0	0	0	0
454.35	174	35	9	2	2	2	3	0	0	0	0	0	0	0	0	0	0	0	0	0	0	0	0	0		9.76049e-12	4.45718e-12	3.38527e-12	2.61667e-12	5.74882e-12	1.28557e-11	4.77555e-11	0	0	0	0	0	0	0	0	0	0	0	0	0	0	0	0	0
455.748	130	21	8	5	2	0	0	0	0	0	0	0	0	0	0	0	0	0	0	0	0	0	0	0		7.29232e-12	2.67431e-12	3.00912e-12	6.54167e-12	5.74882e-12	0	0	0	0	0	0	0	0	0	0	0	0	0	0	0	0	0	0	0
457.146	134	23	8	2	2	1	1	1	0	0	0	0	0	0	0	0	0	0	0	0	0	0	0	0		7.5167e-12	2.929e-12	3.00912e-12	2.61667e-12	5.74882e-12	6.42784e-12	1.59185e-11	3.5325e-11	0	0	0	0	0	0	0	0	0	0	0	0	0	0	0	0
458.544	140	25	4	0	0	1	2	0	0	1	0	0	0	0	0	0	0	0	0	0	0	0	0	0		7.85327e-12	3.1837e-12	1.50456e-12	0	0	6.42784e-12	3.1837e-11	0	0	1.83962e-10	0	0	0	0	0	0	0	0	0	0	0	0	0	0
459.942	159	44	5	2	2	0	2	0	0	0	0	0	0	0	0	0	0	0	0	0	0	0	0	0		8.91907e-12	5.60331e-12	1.8807e-12	2.61667e-12	5.74882e-12	0	3.1837e-11	0	0	0	0	0	0	0	0	0	0	0	0	0	0	0	0	0
461.34	134	10	12	2	3	1	2	1	0	0	1	0	0	0	0	0	0	0	0	0	0	0	0	0		7.5167e-12	1.27348e-12	4.51369e-12	2.61667e-12	8.62323e-12	6.42784e-12	3.1837e-11	3.5325e-11	0	0	3.59301e-10	0	0	0	0	0	0	0	0	0	0	0	0	0
462.738	127	29	9	0	0	1	0	1	0	0	0	0	0	0	0	0	0	0	0	0	0	0	0	0		7.12404e-12	3.69309e-12	3.38527e-12	0	0	6.42784e-12	0	3.5325e-11	0	0	0	0	0	0	0	0	0	0	0	0	0	0	0	0
464.136	135	28	7	0	3	0	2	1	1	0	0	0	0	0	0	0	0	0	0	0	0	0	0	0		7.5728e-12	3.56574e-12	2.63298e-12	0	8.62323e-12	0	3.1837e-11	3.5325e-11	8.37333e-11	0	0	0	0	0	0	0	0	0	0	0	0	0	0	0
465.534	124	23	12	1	3	0	0	0	0	0	0	0	0	0	0	0	0	0	0	0	0	0	0	0		6.95575e-12	2.929e-12	4.51369e-12	1.30833e-12	8.62323e-12	0	0	0	0	0	0	0	0	0	0	0	0	0	0	0	0	0	0	0
466.932	106	17	9	1	0	2	2	0	0	0	0	0	0	0	0	0	0	0	0	0	0	0	0	0		5.94605e-12	2.16491e-12	3.38527e-12	1.30833e-12	0	1.28557e-11	3.1837e-11	0	0	0	0	0	0	0	0	0	0	0	0	0	0	0	0	0
468.33	121	17	5	0	3	1	0	0	0	0	0	0	0	0	0	0	0	0	0	0	0	0	0	0		6.78747e-12	2.16491e-12	1.8807e-12	0	8.62323e-12	6.42784e-12	0	0	0	0	0	0	0	0	0	0	0	0	0	0	0	0	0	0
469.728	101	28	5	2	0	1	0	1	0	0	0	0	0	0	0	0	0	0	0	0	0	0	0	0		5.66557e-12	3.56574e-12	1.8807e-12	2.61667e-12	0	6.42784e-12	0	3.5325e-11	0	0	0	0	0	0	0	0	0	0	0	0	0	0	0	0
471.126	156	32	14	2	2	0	1	2	0	0	0	0	0	0	0	0	0	0	0	0	0	0	0	0		8.75079e-12	4.07513e-12	5.26597e-12	2.61667e-12	5.74882e-12	0	1.59185e-11	7.065e-11	0	0	0	0	0	0	0	0	0	0	0	0	0	0	0	0
472.524	153	43	9	3	4	0	1	1	0	0	0	0	0	0	0	0	0	0	0	0	0	0	0	0		8.5825e-12	5.47596e-12	3.38527e-12	3.925e-12	1.14976e-11	0	1.59185e-11	3.5325e-11	0	0	0	0	0	0	0	0	0	0	0	0	0	0	0	0
473.922	132	35	10	2	5	1	1	2	0	0	0	0	0	0	0	0	0	0	0	0	0	0	0	0		7.40451e-12	4.45718e-12	3.76141e-12	2.61667e-12	1.4372e-11	6.42784e-12	1.59185e-11	7.065e-11	0	0	0	0	0	0	0	0	0	0	0	0	0	0	0	0
475.32	104	25	8	3	1	0	0	0	1	0	0	0	0	0	0	0	0	0	0	0	0	0	0	0		5.83386e-12	3.1837e-12	3.00912e-12	3.925e-12	2.87441e-12	0	0	0	8.37333e-11	0	0	0	0	0	0	0	0	0	0	0	0	0	0	0
476.718	106	41	8	1	1	2	2	0	0	0	0	0	0	0	0	0	0	0	0	0	0	0	0	0		5.94605e-12	5.22127e-12	3.00912e-12	1.30833e-12	2.87441e-12	1.28557e-11	3.1837e-11	0	0	0	0	0	0	0	0	0	0	0	0	0	0	0	0	0
478.116	120	22	8	1	3	2	0	1	0	0	0	0	0	0	0	0	0	0	0	0	0	0	0	0		6.73137e-12	2.80165e-12	3.00912e-12	1.30833e-12	8.62323e-12	1.28557e-11	0	3.5325e-11	0	0	0	0	0	0	0	0	0	0	0	0	0	0	0	0
479.514	153	36	10	2	1	1	0	0	0	0	0	0	0	0	0	0	0	0	0	0	0	0	0	0		8.5825e-12	4.58453e-12	3.76141e-12	2.61667e-12	2.87441e-12	6.42784e-12	0	0	0	0	0	0	0	0	0	0	0	0	0	0	0	0	0	0
480.912	128	28	15	3	0	2	1	0	0	0	0	0	0	0	0	0	0	0	0	0	0	0	0	0		7.18013e-12	3.56574e-12	5.64211e-12	3.925e-12	0	1.28557e-11	1.59185e-11	0	0	0	0	0	0	0	0	0	0	0	0	0	0	0	0	0
482.31	104	19	8	1	1	1	1	0	0	0	0	0	0	0	0	0	0	0	0	0	0	0	0	0		5.83386e-12	2.41961e-12	3.00912e-12	1.30833e-12	2.87441e-12	6.42784e-12	1.59185e-11	0	0	0	0	0	0	0	0	0	0	0	0	0	0	0	0	0
483.708	133	24	4	2	1	4	2	0	0	0	0	0	0	0	0	0	0	0	0	0	0	0	0	0		7.46061e-12	3.05635e-12	1.50456e-12	2.61667e-12	2.87441e-12	2.57114e-11	3.1837e-11	0	0	0	0	0	0	0	0	0	0	0	0	0	0	0	0	0
485.106	133	22	7	1	0	0	0	0	0	0	0	0	0	0	0	0	0	0	0	0	0	0	0	0		7.46061e-12	2.80165e-12	2.63298e-12	1.30833e-12	0	0	0	0	0	0	0	0	0	0	0	0	0	0	0	0	0	0	0	0
486.504	102	16	13	1	2	0	1	1	1	0	0	0	0	0	0	0	0	0	0	0	0	0	0	0		5.72167e-12	2.03757e-12	4.88983e-12	1.30833e-12	5.74882e-12	0	1.59185e-11	3.5325e-11	8.37333e-11	0	0	0	0	0	0	0	0	0	0	0	0	0	0	0
487.902	102	20	4	6	1	0	2	0	0	0	0	0	0	0	0	0	0	0	0	0	0	0	0	0		5.72167e-12	2.54696e-12	1.50456e-12	7.85e-12	2.87441e-12	0	3.1837e-11	0	0	0	0	0	0	0	0	0	0	0	0	0	0	0	0	0
489.3	141	29	6	1	3	2	1	0	0	0	0	0	0	0	0	0	0	0	0	0	0	0	0	0		7.90937e-12	3.69309e-12	2.25684e-12	1.30833e-12	8.62323e-12	1.28557e-11	1.59185e-11	0	0	0	0	0	0	0	0	0	0	0	0	0	0	0	0	0
490.698	145	26	11	3	1	1	0	0	0	0	0	0	0	0	0	0	0	0	0	0	0	0	0	0		8.13374e-12	3.31105e-12	4.13755e-12	3.925e-12	2.87441e-12	6.42784e-12	0	0	0	0	0	0	0	0	0	0	0	0	0	0	0	0	0	0
492.096	163	35	11	4	3	2	2	1	0	0	0	0	0	0	0	0	0	0	0	0	0	0	0	0		9.14345e-12	4.45718e-12	4.13755e-12	5.23333e-12	8.62323e-12	1.28557e-11	3.1837e-11	3.5325e-11	0	0	0	0	0	0	0	0	0	0	0	0	0	0	0	0
493.494	157	24	10	1	1	0	1	0	0	0	0	0	0	0	0	0	0	0	0	0	0	0	0	0		8.80688e-12	3.05635e-12	3.76141e-12	1.30833e-12	2.87441e-12	0	1.59185e-11	0	0	0	0	0	0	0	0	0	0	0	0	0	0	0	0	0
494.892	161	29	7	1	1	2	1	1	0	0	0	0	0	0	0	0	0	0	0	0	0	0	0	0		9.03126e-12	3.69309e-12	2.63298e-12	1.30833e-12	2.87441e-12	1.28557e-11	1.59185e-11	3.5325e-11	0	0	0	0	0	0	0	0	0	0	0	0	0	0	0	0
496.29	117	22	11	3	4	2	0	0	0	0	0	0	0	0	0	0	0	0	0	0	0	0	0	0		6.56309e-12	2.80165e-12	4.13755e-12	3.925e-12	1.14976e-11	1.28557e-11	0	0	0	0	0	0	0	0	0	0	0	0	0	0	0	0	0	0
497.688	116	19	6	1	4	2	0	0	0	0	0	0	0	0	0	0	0	0	0	0	0	0	0	0		6.507e-12	2.41961e-12	2.25684e-12	1.30833e-12	1.14976e-11	1.28557e-11	0	0	0	0	0	0	0	0	0	0	0	0	0	0	0	0	0	0
499.086	100	19	12	2	0	2	1	1	0	1	0	0	0	0	0	0	0	0	0	0	0	0	0	0		5.60948e-12	2.41961e-12	4.51369e-12	2.61667e-12	0	1.28557e-11	1.59185e-11	3.5325e-11	0	1.83962e-10	0	0	0	0	0	0	0	0	0	0	0	0	0	0
500.484	106	21	5	4	3	1	2	0	0	0	0	0	0	0	0	0	0	0	0	0	0	0	0	0		5.94605e-12	2.67431e-12	1.8807e-12	5.23333e-12	8.62323e-12	6.42784e-12	3.1837e-11	0	0	0	0	0	0	0	0	0	0	0	0	0	0	0	0	0
501.882	132	26	8	2	2	1	0	0	0	0	0	0	0	0	0	0	0	0	0	0	0	0	0	0		7.40451e-12	3.31105e-12	3.00912e-12	2.61667e-12	5.74882e-12	6.42784e-12	0	0	0	0	0	0	0	0	0	0	0	0	0	0	0	0	0	0
503.28	89	20	7	5	2	1	1	0	0	0	0	0	0	0	0	0	0	0	0	0	0	0	0	0		4.99244e-12	2.54696e-12	2.63298e-12	6.54167e-12	5.74882e-12	6.42784e-12	1.59185e-11	0	0	0	0	0	0	0	0	0	0	0	0	0	0	0	0	0
504.678	127	23	7	5	1	4	0	0	0	0	0	0	0	0	0	0	0	0	0	0	0	0	0	0		7.12404e-12	2.929e-12	2.63298e-12	6.54167e-12	2.87441e-12	2.57114e-11	0	0	0	0	0	0	0	0	0	0	0	0	0	0	0	0	0	0
506.076	132	19	8	4	1	0	1	0	0	0	0	0	0	0	0	0	0	0	0	0	0	0	0	0		7.40451e-12	2.41961e-12	3.00912e-12	5.23333e-12	2.87441e-12	0	1.59185e-11	0	0	0	0	0	0	0	0	0	0	0	0	0	0	0	0	0
507.474	101	20	8	2	3	2	1	0	0	0	0	0	0	0	0	0	0	0	0	0	0	0	0	0		5.66557e-12	2.54696e-12	3.00912e-12	2.61667e-12	8.62323e-12	1.28557e-11	1.59185e-11	0	0	0	0	0	0	0	0	0	0	0	0	0	0	0	0	0
508.872	95	17	4	2	0	4	2	0	1	0	0	0	0	0	0	0	0	0	0	0	0	0	0	0		5.32901e-12	2.16491e-12	1.50456e-12	2.61667e-12	0	2.57114e-11	3.1837e-11	0	8.37333e-11	0	0	0	0	0	0	0	0	0	0	0	0	0	0	0
510.27	108	27	9	1	1	1	0	0	0	0	0	0	0	0	0	0	0	0	0	0	0	0	0	0		6.05824e-12	3.43839e-12	3.38527e-12	1.30833e-12	2.87441e-12	6.42784e-12	0	0	0	0	0	0	0	0	0	0	0	0	0	0	0	0	0	0
511.668	106	21	12	1	4	4	0	0	0	0	0	0	0	0	0	0	0	0	0	0	0	0	0	0		5.94605e-12	2.67431e-12	4.51369e-12	1.30833e-12	1.14976e-11	2.57114e-11	0	0	0	0	0	0	0	0	0	0	0	0	0	0	0	0	0	0
513.066	97	18	7	1	2	2	0	0	0	0	0	0	0	0	0	0	0	0	0	0	0	0	0	0		5.44119e-12	2.29226e-12	2.63298e-12	1.30833e-12	5.74882e-12	1.28557e-11	0	0	0	0	0	0	0	0	0	0	0	0	0	0	0	0	0	0
514.464	120	21	8	3	1	2	0	0	0	0	0	0	0	0	0	0	0	0	0	0	0	0	0	0		6.73137e-12	2.67431e-12	3.00912e-12	3.925e-12	2.87441e-12	1.28557e-11	0	0	0	0	0	0	0	0	0	0	0	0	0	0	0	0	0	0
515.862	73	10	4	0	1	3	2	1	0	0	0	0	0	0	0	0	0	0	0	0	0	0	0	0		4.09492e-12	1.27348e-12	1.50456e-12	0	2.87441e-12	1.92835e-11	3.1837e-11	3.5325e-11	0	0	0	0	0	0	0	0	0	0	0	0	0	0	0	0
517.26	93	19	10	1	1	1	2	0	0	0	0	0	0	0	0	0	0	0	0	0	0	0	0	0		5.21682e-12	2.41961e-12	3.76141e-12	1.30833e-12	2.87441e-12	6.42784e-12	3.1837e-11	0	0	0	0	0	0	0	0	0	0	0	0	0	0	0	0	0
518.658	120	17	8	3	1	1	1	0	0	0	0	0	0	0	0	0	0	0	0	0	0	0	0	0		6.73137e-12	2.16491e-12	3.00912e-12	3.925e-12	2.87441e-12	6.42784e-12	1.59185e-11	0	0	0	0	0	0	0	0	0	0	0	0	0	0	0	0	0
520.056	81	27	4	2	3	1	2	0	0	0	0	0	0	0	0	0	0	0	0	0	0	0	0	0		4.54368e-12	3.43839e-12	1.50456e-12	2.61667e-12	8.62323e-12	6.42784e-12	3.1837e-11	0	0	0	0	0	0	0	0	0	0	0	0	0	0	0	0	0
521.454	135	27	10	0	5	1	1	1	0	0	0	0	0	0	0	0	0	0	0	0	0	0	0	0		7.5728e-12	3.43839e-12	3.76141e-12	0	1.4372e-11	6.42784e-12	1.59185e-11	3.5325e-11	0	0	0	0	0	0	0	0	0	0	0	0	0	0	0	0
522.852	97	24	10	1	2	3	1	0	0	0	0	0	0	0	0	0	0	0	0	0	0	0	0	0		5.44119e-12	3.05635e-12	3.76141e-12	1.30833e-12	5.74882e-12	1.92835e-11	1.59185e-11	0	0	0	0	0	0	0	0	0	0	0	0	0	0	0	0	0
524.25	124	19	11	1	0	0	0	0	0	0	0	0	0	0	0	0	0	0	0	0	0	0	0	0		6.95575e-12	2.41961e-12	4.13755e-12	1.30833e-12	0	0	0	0	0	0	0	0	0	0	0	0	0	0	0	0	0	0	0	0
525.648	135	33	10	0	2	2	0	0	0	0	0	0	0	0	0	0	0	0	0	0	0	0	0	0		7.5728e-12	4.20248e-12	3.76141e-12	0	5.74882e-12	1.28557e-11	0	0	0	0	0	0	0	0	0	0	0	0	0	0	0	0	0	0
527.046	102	14	10	1	0	2	0	0	1	0	0	0	0	0	0	0	0	0	0	0	0	0	0	0		5.72167e-12	1.78287e-12	3.76141e-12	1.30833e-12	0	1.28557e-11	0	0	8.37333e-11	0	0	0	0	0	0	0	0	0	0	0	0	0	0	0
528.444	94	17	9	1	1	3	1	0	0	1	0	0	0	0	0	0	0	0	0	0	0	0	0	0		5.27291e-12	2.16491e-12	3.38527e-12	1.30833e-12	2.87441e-12	1.92835e-11	1.59185e-11	0	0	1.83962e-10	0	0	0	0	0	0	0	0	0	0	0	0	0	0
529.842	93	14	4	0	1	2	1	0	0	0	0	0	0	0	0	0	0	0	0	0	0	0	0	0		5.21682e-12	1.78287e-12	1.50456e-12	0	2.87441e-12	1.28557e-11	1.59185e-11	0	0	0	0	0	0	0	0	0	0	0	0	0	0	0	0	0
531.24	99	21	7	1	2	1	0	0	0	0	0	0	0	0	0	0	0	0	0	0	0	0	0	0		5.55338e-12	2.67431e-12	2.63298e-12	1.30833e-12	5.74882e-12	6.42784e-12	0	0	0	0	0	0	0	0	0	0	0	0	0	0	0	0	0	0
532.638	81	20	5	0	1	2	0	0	0	0	0	0	0	0	0	0	0	0	0	0	0	0	0	0		4.54368e-12	2.54696e-12	1.8807e-12	0	2.87441e-12	1.28557e-11	0	0	0	0	0	0	0	0	0	0	0	0	0	0	0	0	0	0
534.036	148	31	9	2	2	1	3	0	0	1	0	0	0	0	0	0	0	0	0	0	0	0	0	0		8.30203e-12	3.94779e-12	3.38527e-12	2.61667e-12	5.74882e-12	6.42784e-12	4.77555e-11	0	0	1.83962e-10	0	0	0	0	0	0	0	0	0	0	0	0	0	0
535.434	95	19	12	4	2	1	0	0	0	0	0	0	0	0	0	0	0	0	0	0	0	0	0	0		5.32901e-12	2.41961e-12	4.51369e-12	5.23333e-12	5.74882e-12	6.42784e-12	0	0	0	0	0	0	0	0	0	0	0	0	0	0	0	0	0	0
536.832	107	22	10	2	0	0	0	0	0	0	0	0	0	0	0	0	0	0	0	0	0	0	0	0		6.00214e-12	2.80165e-12	3.76141e-12	2.61667e-12	0	0	0	0	0	0	0	0	0	0	0	0	0	0	0	0	0	0	0	0
538.23	108	28	10	3	1	1	2	0	0	0	0	0	0	0	0	0	0	0	0	0	0	0	0	0		6.05824e-12	3.56574e-12	3.76141e-12	3.925e-12	2.87441e-12	6.42784e-12	3.1837e-11	0	0	0	0	0	0	0	0	0	0	0	0	0	0	0	0	0
539.628	113	26	5	3	1	0	3	0	0	0	0	0	0	0	0	0	0	0	0	0	0	0	0	0		6.33871e-12	3.31105e-12	1.8807e-12	3.925e-12	2.87441e-12	0	4.77555e-11	0	0	0	0	0	0	0	0	0	0	0	0	0	0	0	0	0
541.026	99	24	7	2	4	0	3	0	0	0	0	0	0	0	0	0	0	0	0	0	0	0	0	0		5.55338e-12	3.05635e-12	2.63298e-12	2.61667e-12	1.14976e-11	0	4.77555e-11	0	0	0	0	0	0	0	0	0	0	0	0	0	0	0	0	0
542.424	131	19	11	1	4	3	1	0	0	0	0	0	0	0	0	0	0	0	0	0	0	0	0	0		7.34842e-12	2.41961e-12	4.13755e-12	1.30833e-12	1.14976e-11	1.92835e-11	1.59185e-11	0	0	0	0	0	0	0	0	0	0	0	0	0	0	0	0	0
543.822	147	32	11	4	1	5	2	0	0	0	0	0	0	0	0	0	0	0	0	0	0	0	0	0		8.24593e-12	4.07513e-12	4.13755e-12	5.23333e-12	2.87441e-12	3.21392e-11	3.1837e-11	0	0	0	0	0	0	0	0	0	0	0	0	0	0	0	0	0
545.22	109	21	8	3	1	3	0	0	0	0	0	0	0	0	0	0	0	0	0	0	0	0	0	0		6.11433e-12	2.67431e-12	3.00912e-12	3.925e-12	2.87441e-12	1.92835e-11	0	0	0	0	0	0	0	0	0	0	0	0	0	0	0	0	0	0
546.618	160	23	13	5	8	3	2	0	0	0	0	0	0	0	0	0	0	0	0	0	0	0	0	0		8.97517e-12	2.929e-12	4.88983e-12	6.54167e-12	2.29953e-11	1.92835e-11	3.1837e-11	0	0	0	0	0	0	0	0	0	0	0	0	0	0	0	0	0
548.016	148	30	14	3	5	1	1	1	0	0	0	0	0	0	0	0	0	0	0	0	0	0	0	0		8.30203e-12	3.82044e-12	5.26597e-12	3.925e-12	1.4372e-11	6.42784e-12	1.59185e-11	3.5325e-11	0	0	0	0	0	0	0	0	0	0	0	0	0	0	0	0
549.414	109	29	6	3	2	0	1	0	0	0	0	0	0	0	0	0	0	0	0	0	0	0	0	0		6.11433e-12	3.69309e-12	2.25684e-12	3.925e-12	5.74882e-12	0	1.59185e-11	0	0	0	0	0	0	0	0	0	0	0	0	0	0	0	0	0
550.812	107	29	9	2	4	2	1	0	0	0	0	0	0	0	0	0	0	0	0	0	0	0	0	0		6.00214e-12	3.69309e-12	3.38527e-12	2.61667e-12	1.14976e-11	1.28557e-11	1.59185e-11	0	0	0	0	0	0	0	0	0	0	0	0	0	0	0	0	0
552.21	84	15	6	0	2	0	0	0	0	1	0	0	0	0	0	0	0	0	0	0	0	0	0	0		4.71196e-12	1.91022e-12	2.25684e-12	0	5.74882e-12	0	0	0	0	1.83962e-10	0	0	0	0	0	0	0	0	0	0	0	0	0	0
553.608	109	26	9	2	4	2	1	0	0	0	0	0	0	0	0	0	0	0	0	0	0	0	0	0		6.11433e-12	3.31105e-12	3.38527e-12	2.61667e-12	1.14976e-11	1.28557e-11	1.59185e-11	0	0	0	0	0	0	0	0	0	0	0	0	0	0	0	0	0
555.006	143	29	8	1	4	0	1	0	1	0	0	0	0	0	0	0	0	0	0	0	0	0	0	0		8.02156e-12	3.69309e-12	3.00912e-12	1.30833e-12	1.14976e-11	0	1.59185e-11	0	8.37333e-11	0	0	0	0	0	0	0	0	0	0	0	0	0	0	0
556.404	104	28	3	3	1	0	0	0	0	0	0	0	0	0	0	0	0	0	0	0	0	0	0	0		5.83386e-12	3.56574e-12	1.12842e-12	3.925e-12	2.87441e-12	0	0	0	0	0	0	0	0	0	0	0	0	0	0	0	0	0	0	0
557.802	112	12	4	1	3	0	3	0	0	0	0	0	0	0	0	0	0	0	0	0	0	0	0	0		6.28262e-12	1.52818e-12	1.50456e-12	1.30833e-12	8.62323e-12	0	4.77555e-11	0	0	0	0	0	0	0	0	0	0	0	0	0	0	0	0	0
559.2	95	22	8	2	2	2	0	0	0	1	0	0	0	0	0	0	0	0	0	0	0	0	0	0		5.32901e-12	2.80165e-12	3.00912e-12	2.61667e-12	5.74882e-12	1.28557e-11	0	0	0	1.83962e-10	0	0	0	0	0	0	0	0	0	0	0	0	0	0
560.598	95	19	12	0	3	2	0	0	0	0	0	0	0	0	0	0	0	0	0	0	0	0	0	0		5.32901e-12	2.41961e-12	4.51369e-12	0	8.62323e-12	1.28557e-11	0	0	0	0	0	0	0	0	0	0	0	0	0	0	0	0	0	0
561.996	129	34	11	1	1	0	1	1	0	0	0	0	0	0	0	0	0	0	0	0	0	0	0	0		7.23623e-12	4.32983e-12	4.13755e-12	1.30833e-12	2.87441e-12	0	1.59185e-11	3.5325e-11	0	0	0	0	0	0	0	0	0	0	0	0	0	0	0	0
563.394	149	24	10	6	5	0	0	0	0	0	0	0	0	1	0	0	0	0	0	0	0	0	0	0		8.35812e-12	3.05635e-12	3.76141e-12	7.85e-12	1.4372e-11	0	0	0	0	0	0	0	0	2.2608e-09	0	0	0	0	0	0	0	0	0	0
564.792	111	13	6	1	3	1	2	0	0	0	0	0	0	0	0	0	0	0	0	0	0	0	0	0		6.22652e-12	1.65552e-12	2.25684e-12	1.30833e-12	8.62323e-12	6.42784e-12	3.1837e-11	0	0	0	0	0	0	0	0	0	0	0	0	0	0	0	0	0
566.19	118	28	13	1	3	3	0	0	0	0	0	0	0	0	0	0	0	0	0	0	0	0	0	0		6.61919e-12	3.56574e-12	4.88983e-12	1.30833e-12	8.62323e-12	1.92835e-11	0	0	0	0	0	0	0	0	0	0	0	0	0	0	0	0	0	0
567.588	122	19	9	1	4	1	2	1	0	0	0	0	0	0	0	0	0	0	0	0	0	0	0	0		6.84356e-12	2.41961e-12	3.38527e-12	1.30833e-12	1.14976e-11	6.42784e-12	3.1837e-11	3.5325e-11	0	0	0	0	0	0	0	0	0	0	0	0	0	0	0	0
568.986	104	24	6	2	4	3	2	0	0	0	0	0	0	0	0	0	0	0	0	0	0	0	0	0		5.83386e-12	3.05635e-12	2.25684e-12	2.61667e-12	1.14976e-11	1.92835e-11	3.1837e-11	0	0	0	0	0	0	0	0	0	0	0	0	0	0	0	0	0

## Sheet: OPC - 11-11-2023 - Sakurajima
Analysis time [s]	Counts per seconds [bins equivalent in µm]																									Raw data conversion into mass based on particle density of 2500 kg m-3 and spherical assumption [g]
	Bin0	Bin1	Bin2	Bin3	Bin4	Bin5	Bin6	Bin7	Bin8	Bin9	Bin10	Bin11	Bin12	Bin13	Bin14	Bin15	Bin16	Bin17	Bin18	Bin19	Bin20	Bin21	Bin22	Bin23		Bin0	Bin1	Bin2	Bin3	Bin4	Bin5	Bin6	Bin7	Bin8	Bin9	Bin10	Bin11	Bin12	Bin13	Bin14	Bin15	Bin16	Bin17	Bin18	Bin19	Bin20	Bin21	Bin22	Bin23
	0,35 - 0,46	0,46 - 0,66	0,66 - 1,00	1,00 - 1,30	1,30 - 1,70	1,70 - 2,30	2,30 - 3,00	3,00 - 4,00	4,00 - 5,20	5,20 - 6,50	6,50 - 8,00	8,00 - 10,00	10,00 - 12,00	12,00 - 14,00	14,00 - 16,00	16,00 - 18,00	18,00 - 20,00	20,00 - 22,00	22,00 - 25,00	25,00 - 28,00	28,00 - 31,00	31,00 - 34,00	34,00 - 37,00	37,00 - 40,00		0.35	0.46	0.66	1	1.3	1.7	2.3	3	4	5.2	6.5	8	10	12	14	16	18	20	22	25	28	31	34	37
0	31	0	1	0	3	0	0	0	0	0	0	0	0	0	0	0	0	0	0	0	0	0	0	0		1.73894e-12	0	3.76141e-13	0	8.62323e-12	0	0	0	0	0	0	0	0	0	0	0	0	0	0	0	0	0	0	0
1.398	23	3	3	0	0	0	0	1	0	0	0	0	0	0	0	0	0	0	0	0	0	0	0	0		1.29018e-12	3.82044e-13	1.12842e-12	0	0	0	0	3.5325e-11	0	0	0	0	0	0	0	0	0	0	0	0	0	0	0	0
2.796	24	2	3	1	0	0	0	0	0	0	0	0	0	0	0	0	0	0	0	0	0	0	0	0		1.34627e-12	2.54696e-13	1.12842e-12	1.30833e-12	0	0	0	0	0	0	0	0	0	0	0	0	0	0	0	0	0	0	0	0
4.194	27	1	2	0	1	2	0	0	0	0	0	0	0	0	0	0	0	0	0	0	0	0	0	0		1.51456e-12	1.27348e-13	7.52281e-13	0	2.87441e-12	1.28557e-11	0	0	0	0	0	0	0	0	0	0	0	0	0	0	0	0	0	0
5.592	25	4	1	1	0	2	0	0	1	0	0	0	0	0	0	0	0	0	0	0	0	0	0	0		1.40237e-12	5.09392e-13	3.76141e-13	1.30833e-12	0	1.28557e-11	0	0	8.37333e-11	0	0	0	0	0	0	0	0	0	0	0	0	0	0	0
6.99	26	4	2	0	1	0	0	1	0	0	0	0	0	0	0	0	0	0	0	0	0	0	0	0		1.45846e-12	5.09392e-13	7.52281e-13	0	2.87441e-12	0	0	3.5325e-11	0	0	0	0	0	0	0	0	0	0	0	0	0	0	0	0
8.388	29	3	5	0	0	0	1	0	0	0	0	0	0	0	0	0	0	0	0	0	0	0	0	0		1.62675e-12	3.82044e-13	1.8807e-12	0	0	0	1.59185e-11	0	0	0	0	0	0	0	0	0	0	0	0	0	0	0	0	0
9.786	25	7	0	1	1	0	1	0	0	0	0	0	0	0	0	0	0	0	0	0	0	0	0	0		1.40237e-12	8.91436e-13	0	1.30833e-12	2.87441e-12	0	1.59185e-11	0	0	0	0	0	0	0	0	0	0	0	0	0	0	0	0	0
11.184	27	5	2	1	3	0	0	0	0	0	0	0	0	0	0	0	0	0	0	0	0	0	0	0		1.51456e-12	6.3674e-13	7.52281e-13	1.30833e-12	8.62323e-12	0	0	0	0	0	0	0	0	0	0	0	0	0	0	0	0	0	0	0
12.582	31	6	4	1	0	0	0	0	0	0	0	0	0	0	0	0	0	0	0	0	0	0	0	0		1.73894e-12	7.64088e-13	1.50456e-12	1.30833e-12	0	0	0	0	0	0	0	0	0	0	0	0	0	0	0	0	0	0	0	0
13.98	33	5	1	2	1	0	0	0	0	0	0	0	0	0	0	0	0	0	0	0	0	0	0	0		1.85113e-12	6.3674e-13	3.76141e-13	2.61667e-12	2.87441e-12	0	0	0	0	0	0	0	0	0	0	0	0	0	0	0	0	0	0	0
15.378	24	5	2	1	2	0	0	0	0	0	0	0	0	0	0	0	0	0	0	0	0	0	0	0		1.34627e-12	6.3674e-13	7.52281e-13	1.30833e-12	5.74882e-12	0	0	0	0	0	0	0	0	0	0	0	0	0	0	0	0	0	0	0
16.776	32	4	6	0	1	0	0	0	0	1	0	0	0	0	0	0	0	0	0	0	0	0	0	0		1.79503e-12	5.09392e-13	2.25684e-12	0	2.87441e-12	0	0	0	0	1.83962e-10	0	0	0	0	0	0	0	0	0	0	0	0	0	0
18.174	26	4	1	2	0	4	0	1	0	0	0	0	0	0	0	0	0	0	0	0	0	0	0	0		1.45846e-12	5.09392e-13	3.76141e-13	2.61667e-12	0	2.57114e-11	0	3.5325e-11	0	0	0	0	0	0	0	0	0	0	0	0	0	0	0	0
19.572	27	4	1	1	1	1	0	0	0	0	0	0	0	0	0	0	0	0	0	0	0	0	0	0		1.51456e-12	5.09392e-13	3.76141e-13	1.30833e-12	2.87441e-12	6.42784e-12	0	0	0	0	0	0	0	0	0	0	0	0	0	0	0	0	0	0
20.97	33	2	0	1	3	2	2	0	1	0	0	0	0	0	0	0	0	0	0	0	0	0	0	0		1.85113e-12	2.54696e-13	0	1.30833e-12	8.62323e-12	1.28557e-11	3.1837e-11	0	8.37333e-11	0	0	0	0	0	0	0	0	0	0	0	0	0	0	0
22.368	29	4	3	0	0	1	0	0	0	0	0	0	0	0	0	0	0	0	0	0	0	0	0	0		1.62675e-12	5.09392e-13	1.12842e-12	0	0	6.42784e-12	0	0	0	0	0	0	0	0	0	0	0	0	0	0	0	0	0	0
23.766	35	4	3	1	1	0	0	0	0	0	0	0	0	0	0	0	0	0	0	0	0	0	0	0		1.96332e-12	5.09392e-13	1.12842e-12	1.30833e-12	2.87441e-12	0	0	0	0	0	0	0	0	0	0	0	0	0	0	0	0	0	0	0
25.164	34	2	0	2	0	0	0	0	0	1	0	0	0	0	0	0	0	0	0	0	0	0	0	0		1.90722e-12	2.54696e-13	0	2.61667e-12	0	0	0	0	0	1.83962e-10	0	0	0	0	0	0	0	0	0	0	0	0	0	0
26.562	33	0	3	1	2	2	0	1	0	1	0	0	0	0	0	0	0	0	0	0	0	0	0	0		1.85113e-12	0	1.12842e-12	1.30833e-12	5.74882e-12	1.28557e-11	0	3.5325e-11	0	1.83962e-10	0	0	0	0	0	0	0	0	0	0	0	0	0	0
27.96	32	5	0	1	1	0	1	0	0	0	0	0	0	0	0	0	0	0	0	0	0	0	0	0		1.79503e-12	6.3674e-13	0	1.30833e-12	2.87441e-12	0	1.59185e-11	0	0	0	0	0	0	0	0	0	0	0	0	0	0	0	0	0
29.358	27	5	0	1	0	0	0	0	0	0	0	0	0	0	0	0	0	0	0	0	0	0	0	0		1.51456e-12	6.3674e-13	0	1.30833e-12	0	0	0	0	0	0	0	0	0	0	0	0	0	0	0	0	0	0	0	0
30.756	45	4	1	0	1	0	0	0	0	0	0	0	0	0	0	0	0	0	0	0	0	0	0	0		2.52427e-12	5.09392e-13	3.76141e-13	0	2.87441e-12	0	0	0	0	0	0	0	0	0	0	0	0	0	0	0	0	0	0	0
32.154	37	5	2	0	0	0	0	0	0	0	0	0	0	0	0	0	0	0	0	0	0	0	0	0		2.07551e-12	6.3674e-13	7.52281e-13	0	0	0	0	0	0	0	0	0	0	0	0	0	0	0	0	0	0	0	0	0
33.552	32	5	1	0	0	0	0	1	0	0	0	0	0	0	0	0	0	0	0	0	0	0	0	0		1.79503e-12	6.3674e-13	3.76141e-13	0	0	0	0	3.5325e-11	0	0	0	0	0	0	0	0	0	0	0	0	0	0	0	0
34.95	37	4	0	1	2	0	1	0	0	0	0	0	0	0	0	0	0	0	0	0	0	0	0	0		2.07551e-12	5.09392e-13	0	1.30833e-12	5.74882e-12	0	1.59185e-11	0	0	0	0	0	0	0	0	0	0	0	0	0	0	0	0	0
36.348	37	5	1	1	2	0	0	0	1	0	0	0	0	0	0	0	0	0	0	0	0	0	0	0		2.07551e-12	6.3674e-13	3.76141e-13	1.30833e-12	5.74882e-12	0	0	0	8.37333e-11	0	0	0	0	0	0	0	0	0	0	0	0	0	0	0
37.746	28	3	0	1	0	0	0	0	0	0	0	0	0	0	0	0	0	0	0	0	0	0	0	0		1.57065e-12	3.82044e-13	0	1.30833e-12	0	0	0	0	0	0	0	0	0	0	0	0	0	0	0	0	0	0	0	0
39.144	42	2	2	0	0	0	0	0	0	0	0	0	0	0	0	0	0	0	0	0	0	0	0	0		2.35598e-12	2.54696e-13	7.52281e-13	0	0	0	0	0	0	0	0	0	0	0	0	0	0	0	0	0	0	0	0	0
40.542	37	1	4	0	1	0	0	0	0	0	0	0	0	0	0	0	0	0	0	0	0	0	0	0		2.07551e-12	1.27348e-13	1.50456e-12	0	2.87441e-12	0	0	0	0	0	0	0	0	0	0	0	0	0	0	0	0	0	0	0
41.94	30	2	2	0	0	1	0	0	0	0	0	0	0	0	0	0	0	0	0	0	0	0	0	0		1.68284e-12	2.54696e-13	7.52281e-13	0	0	6.42784e-12	0	0	0	0	0	0	0	0	0	0	0	0	0	0	0	0	0	0
43.338	36	3	2	2	2	0	0	1	0	0	0	0	0	0	0	0	0	0	0	0	0	0	0	0		2.01941e-12	3.82044e-13	7.52281e-13	2.61667e-12	5.74882e-12	0	0	3.5325e-11	0	0	0	0	0	0	0	0	0	0	0	0	0	0	0	0
44.736	26	5	3	0	1	1	0	1	0	0	0	0	0	0	0	0	0	0	0	0	0	0	0	0		1.45846e-12	6.3674e-13	1.12842e-12	0	2.87441e-12	6.42784e-12	0	3.5325e-11	0	0	0	0	0	0	0	0	0	0	0	0	0	0	0	0
46.134	28	2	2	0	0	0	0	0	1	0	0	0	0	0	0	0	0	0	0	0	0	0	0	0		1.57065e-12	2.54696e-13	7.52281e-13	0	0	0	0	0	8.37333e-11	0	0	0	0	0	0	0	0	0	0	0	0	0	0	0
47.532	42	3	2	0	0	0	1	0	0	0	0	0	0	0	0	0	0	0	0	0	0	0	0	0		2.35598e-12	3.82044e-13	7.52281e-13	0	0	0	1.59185e-11	0	0	0	0	0	0	0	0	0	0	0	0	0	0	0	0	0
48.93	25	4	2	1	0	2	0	0	0	0	0	0	0	0	0	0	0	0	0	0	0	0	0	0		1.40237e-12	5.09392e-13	7.52281e-13	1.30833e-12	0	1.28557e-11	0	0	0	0	0	0	0	0	0	0	0	0	0	0	0	0	0	0
50.328	31	7	3	0	0	0	2	2	0	1	0	0	0	0	0	0	0	0	0	0	0	0	0	0		1.73894e-12	8.91436e-13	1.12842e-12	0	0	0	3.1837e-11	7.065e-11	0	1.83962e-10	0	0	0	0	0	0	0	0	0	0	0	0	0	0
51.726	31	1	3	0	0	0	0	0	0	0	0	0	1	0	0	0	0	0	0	0	0	0	0	0		1.73894e-12	1.27348e-13	1.12842e-12	0	0	0	0	0	0	0	0	0	1.30833e-09	0	0	0	0	0	0	0	0	0	0	0
53.124	26	2	3	1	1	1	0	0	0	0	0	0	0	0	0	0	0	0	0	0	0	0	0	0		1.45846e-12	2.54696e-13	1.12842e-12	1.30833e-12	2.87441e-12	6.42784e-12	0	0	0	0	0	0	0	0	0	0	0	0	0	0	0	0	0	0
54.522	17	4	3	1	0	1	0	0	0	0	0	0	0	0	0	0	0	0	0	0	0	0	0	0		9.53611e-13	5.09392e-13	1.12842e-12	1.30833e-12	0	6.42784e-12	0	0	0	0	0	0	0	0	0	0	0	0	0	0	0	0	0	0
55.92	29	5	2	1	0	2	0	0	0	0	0	0	0	0	0	0	0	0	0	0	0	0	0	0		1.62675e-12	6.3674e-13	7.52281e-13	1.30833e-12	0	1.28557e-11	0	0	0	0	0	0	0	0	0	0	0	0	0	0	0	0	0	0
57.318	29	4	4	1	1	0	0	0	0	1	0	0	0	0	0	0	0	0	0	0	0	0	0	0		1.62675e-12	5.09392e-13	1.50456e-12	1.30833e-12	2.87441e-12	0	0	0	0	1.83962e-10	0	0	0	0	0	0	0	0	0	0	0	0	0	0
58.716	24	2	1	0	2	0	0	0	0	0	0	0	0	0	0	0	0	0	0	0	0	0	0	0		1.34627e-12	2.54696e-13	3.76141e-13	0	5.74882e-12	0	0	0	0	0	0	0	0	0	0	0	0	0	0	0	0	0	0	0
60.114	7	0	0	0	1	0	0	0	0	0	0	0	0	0	0	0	0	0	0	0	0	0	0	0		3.92664e-13	0	0	0	2.87441e-12	0	0	0	0	0	0	0	0	0	0	0	0	0	0	0	0	0	0	0
61.512	19	1	0	0	0	0	0	0	0	0	0	0	0	0	0	0	0	0	0	0	0	0	0	0		1.0658e-12	1.27348e-13	0	0	0	0	0	0	0	0	0	0	0	0	0	0	0	0	0	0	0	0	0	0
62.91	3	0	0	0	0	0	0	0	0	0	0	0	0	0	0	0	0	0	0	0	0	0	0	0		1.68284e-13	0	0	0	0	0	0	0	0	0	0	0	0	0	0	0	0	0	0	0	0	0	0	0
64.308	24	1	4	0	1	2	1	0	1	0	0	0	0	0	0	0	0	0	0	0	0	0	0	0		1.34627e-12	1.27348e-13	1.50456e-12	0	2.87441e-12	1.28557e-11	1.59185e-11	0	8.37333e-11	0	0	0	0	0	0	0	0	0	0	0	0	0	0	0
65.706	32	4	2	1	0	0	2	0	1	1	0	0	0	0	0	0	0	0	0	0	0	0	0	0		1.79503e-12	5.09392e-13	7.52281e-13	1.30833e-12	0	0	3.1837e-11	0	8.37333e-11	1.83962e-10	0	0	0	0	0	0	0	0	0	0	0	0	0	0
67.104	26	2	4	0	0	0	0	0	0	0	0	0	0	0	0	0	0	0	0	0	0	0	0	0		1.45846e-12	2.54696e-13	1.50456e-12	0	0	0	0	0	0	0	0	0	0	0	0	0	0	0	0	0	0	0	0	0
68.502	19	4	3	0	1	0	0	0	0	0	0	0	0	1	0	0	0	0	0	0	0	0	0	0		1.0658e-12	5.09392e-13	1.12842e-12	0	2.87441e-12	0	0	0	0	0	0	0	0	2.2608e-09	0	0	0	0	0	0	0	0	0	0
69.9	24	2	1	1	0	0	0	0	0	0	0	0	0	0	0	0	0	0	0	0	0	0	0	0		1.34627e-12	2.54696e-13	3.76141e-13	1.30833e-12	0	0	0	0	0	0	0	0	0	0	0	0	0	0	0	0	0	0	0	0
71.298	25	3	3	0	0	1	0	0	0	0	0	0	0	0	0	0	0	0	0	0	0	0	0	0		1.40237e-12	3.82044e-13	1.12842e-12	0	0	6.42784e-12	0	0	0	0	0	0	0	0	0	0	0	0	0	0	0	0	0	0
72.696	25	3	1	1	0	1	0	1	0	0	0	0	0	0	0	0	0	0	0	0	0	0	0	0		1.40237e-12	3.82044e-13	3.76141e-13	1.30833e-12	0	6.42784e-12	0	3.5325e-11	0	0	0	0	0	0	0	0	0	0	0	0	0	0	0	0
74.094	25	4	1	1	1	0	0	1	0	0	0	0	0	0	0	0	0	0	0	0	0	0	0	0		1.40237e-12	5.09392e-13	3.76141e-13	1.30833e-12	2.87441e-12	0	0	3.5325e-11	0	0	0	0	0	0	0	0	0	0	0	0	0	0	0	0
75.492	17	1	2	1	0	0	0	0	0	0	0	0	0	0	0	0	0	0	0	0	0	0	0	0		9.53611e-13	1.27348e-13	7.52281e-13	1.30833e-12	0	0	0	0	0	0	0	0	0	0	0	0	0	0	0	0	0	0	0	0
76.89	23	5	1	1	1	0	0	0	0	0	0	0	0	0	0	0	0	0	0	0	0	0	0	0		1.29018e-12	6.3674e-13	3.76141e-13	1.30833e-12	2.87441e-12	0	0	0	0	0	0	0	0	0	0	0	0	0	0	0	0	0	0	0
78.288	19	2	2	0	0	0	0	0	0	0	0	0	0	0	0	0	0	0	0	0	0	0	0	0		1.0658e-12	2.54696e-13	7.52281e-13	0	0	0	0	0	0	0	0	0	0	0	0	0	0	0	0	0	0	0	0	0
79.686	13	2	3	0	1	0	0	0	0	0	0	0	0	0	0	0	0	0	0	0	0	0	0	0		7.29232e-13	2.54696e-13	1.12842e-12	0	2.87441e-12	0	0	0	0	0	0	0	0	0	0	0	0	0	0	0	0	0	0	0
81.084	25	1	1	0	1	1	1	0	0	0	0	0	0	0	0	0	0	0	0	0	0	0	0	0		1.40237e-12	1.27348e-13	3.76141e-13	0	2.87441e-12	6.42784e-12	1.59185e-11	0	0	0	0	0	0	0	0	0	0	0	0	0	0	0	0	0
82.482	22	5	2	1	0	1	0	0	0	2	0	0	0	0	0	0	0	0	0	0	0	0	0	0		1.23409e-12	6.3674e-13	7.52281e-13	1.30833e-12	0	6.42784e-12	0	0	0	3.67924e-10	0	0	0	0	0	0	0	0	0	0	0	0	0	0
83.88	32	2	1	1	0	0	1	0	0	0	0	0	0	0	0	0	0	0	0	0	0	0	0	0		1.79503e-12	2.54696e-13	3.76141e-13	1.30833e-12	0	0	1.59185e-11	0	0	0	0	0	0	0	0	0	0	0	0	0	0	0	0	0
85.278	15	3	3	2	0	3	1	0	0	0	0	0	0	0	0	0	0	0	0	0	0	0	0	0		8.41422e-13	3.82044e-13	1.12842e-12	2.61667e-12	0	1.92835e-11	1.59185e-11	0	0	0	0	0	0	0	0	0	0	0	0	0	0	0	0	0
86.676	3	1	0	0	0	0	0	0	0	0	0	0	0	0	0	0	0	0	0	0	0	0	0	0		1.68284e-13	1.27348e-13	0	0	0	0	0	0	0	0	0	0	0	0	0	0	0	0	0	0	0	0	0	0
88.074	29	10	3	1	1	3	1	0	0	0	0	0	0	0	0	0	0	0	0	0	0	0	0	0		1.62675e-12	1.27348e-12	1.12842e-12	1.30833e-12	2.87441e-12	1.92835e-11	1.59185e-11	0	0	0	0	0	0	0	0	0	0	0	0	0	0	0	0	0
89.472	24	7	2	0	2	1	2	0	1	0	0	0	0	0	0	0	0	0	0	0	0	0	0	0		1.34627e-12	8.91436e-13	7.52281e-13	0	5.74882e-12	6.42784e-12	3.1837e-11	0	8.37333e-11	0	0	0	0	0	0	0	0	0	0	0	0	0	0	0
90.87	29	3	1	1	0	2	0	1	0	0	0	0	0	0	0	0	0	0	0	0	0	0	0	0		1.62675e-12	3.82044e-13	3.76141e-13	1.30833e-12	0	1.28557e-11	0	3.5325e-11	0	0	0	0	0	0	0	0	0	0	0	0	0	0	0	0
92.268	21	5	3	1	2	1	1	1	0	0	0	0	0	0	0	0	0	0	0	0	0	0	0	0		1.17799e-12	6.3674e-13	1.12842e-12	1.30833e-12	5.74882e-12	6.42784e-12	1.59185e-11	3.5325e-11	0	0	0	0	0	0	0	0	0	0	0	0	0	0	0	0
93.666	13	1	4	2	1	1	2	1	2	0	0	0	0	0	0	0	0	0	0	0	0	0	0	0		7.29232e-13	1.27348e-13	1.50456e-12	2.61667e-12	2.87441e-12	6.42784e-12	3.1837e-11	3.5325e-11	1.67467e-10	0	0	0	0	0	0	0	0	0	0	0	0	0	0	0
95.064	42	9	5	1	3	0	2	2	1	0	0	0	0	0	0	0	0	0	0	0	0	0	0	0		2.35598e-12	1.14613e-12	1.8807e-12	1.30833e-12	8.62323e-12	0	3.1837e-11	7.065e-11	8.37333e-11	0	0	0	0	0	0	0	0	0	0	0	0	0	0	0
96.462	25	5	2	0	2	1	0	0	0	0	0	0	0	0	0	0	0	0	0	0	0	0	0	0		1.40237e-12	6.3674e-13	7.52281e-13	0	5.74882e-12	6.42784e-12	0	0	0	0	0	0	0	0	0	0	0	0	0	0	0	0	0	0
97.86	52	16	8	6	12	8	11	2	6	1	0	2	0	0	0	0	0	0	0	0	0	0	0	0		2.91693e-12	2.03757e-12	3.00912e-12	7.85e-12	3.44929e-11	5.14227e-11	1.75103e-10	7.065e-11	5.024e-10	1.83962e-10	0	1.33973e-09	0	0	0	0	0	0	0	0	0	0	0	0
99.258	24	1	2	0	0	1	0	0	0	0	0	0	0	0	0	0	0	0	0	0	0	0	0	0		1.34627e-12	1.27348e-13	7.52281e-13	0	0	6.42784e-12	0	0	0	0	0	0	0	0	0	0	0	0	0	0	0	0	0	0
100.656	15	4	2	1	0	1	1	0	0	0	0	0	0	0	0	0	0	0	0	0	0	0	0	0		8.41422e-13	5.09392e-13	7.52281e-13	1.30833e-12	0	6.42784e-12	1.59185e-11	0	0	0	0	0	0	0	0	0	0	0	0	0	0	0	0	0
102.054	35	10	3	1	3	6	1	0	1	0	0	0	0	0	0	0	0	0	0	0	0	0	0	0		1.96332e-12	1.27348e-12	1.12842e-12	1.30833e-12	8.62323e-12	3.8567e-11	1.59185e-11	0	8.37333e-11	0	0	0	0	0	0	0	0	0	0	0	0	0	0	0
103.452	40	1	0	2	2	0	1	0	0	0	0	0	0	0	0	0	0	0	0	0	0	0	0	0		2.24379e-12	1.27348e-13	0	2.61667e-12	5.74882e-12	0	1.59185e-11	0	0	0	0	0	0	0	0	0	0	0	0	0	0	0	0	0
104.85	43	5	1	1	1	0	0	1	0	0	0	0	0	0	0	0	0	0	0	0	0	0	0	0		2.41208e-12	6.3674e-13	3.76141e-13	1.30833e-12	2.87441e-12	0	0	3.5325e-11	0	0	0	0	0	0	0	0	0	0	0	0	0	0	0	0
106.248	57	11	9	3	2	1	2	0	1	1	0	0	0	0	0	0	0	0	0	0	0	0	0	0		3.1974e-12	1.40083e-12	3.38527e-12	3.925e-12	5.74882e-12	6.42784e-12	3.1837e-11	0	8.37333e-11	1.83962e-10	0	0	0	0	0	0	0	0	0	0	0	0	0	0
107.646	41	10	0	1	1	1	1	1	0	1	0	0	0	1	0	0	1	0	0	0	0	0	0	0		2.29989e-12	1.27348e-12	0	1.30833e-12	2.87441e-12	6.42784e-12	1.59185e-11	3.5325e-11	0	1.83962e-10	0	0	0	2.2608e-09	0	0	7.6302e-09	0	0	0	0	0	0	0
109.044	32	8	1	0	1	0	0	0	0	0	0	0	0	0	0	0	0	0	0	0	0	0	0	0		1.79503e-12	1.01878e-12	3.76141e-13	0	2.87441e-12	0	0	0	0	0	0	0	0	0	0	0	0	0	0	0	0	0	0	0
110.442	30	6	1	1	0	0	0	0	0	0	0	0	0	0	0	0	0	0	0	0	0	0	0	0		1.68284e-12	7.64088e-13	3.76141e-13	1.30833e-12	0	0	0	0	0	0	0	0	0	0	0	0	0	0	0	0	0	0	0	0
111.84	37	12	2	1	2	0	1	0	0	1	0	0	0	0	0	0	0	0	0	0	0	0	0	0		2.07551e-12	1.52818e-12	7.52281e-13	1.30833e-12	5.74882e-12	0	1.59185e-11	0	0	1.83962e-10	0	0	0	0	0	0	0	0	0	0	0	0	0	0
113.238	44	9	6	4	2	2	3	1	1	0	0	0	0	0	0	0	0	0	0	0	0	0	0	0		2.46817e-12	1.14613e-12	2.25684e-12	5.23333e-12	5.74882e-12	1.28557e-11	4.77555e-11	3.5325e-11	8.37333e-11	0	0	0	0	0	0	0	0	0	0	0	0	0	0	0
114.636	47	21	8	0	3	4	2	1	0	1	0	0	0	0	0	0	0	0	0	0	0	0	0	0		2.63646e-12	2.67431e-12	3.00912e-12	0	8.62323e-12	2.57114e-11	3.1837e-11	3.5325e-11	0	1.83962e-10	0	0	0	0	0	0	0	0	0	0	0	0	0	0
116.034	59	31	10	6	2	3	5	0	0	1	0	0	0	0	0	0	0	0	0	0	0	0	0	0		3.30959e-12	3.94779e-12	3.76141e-12	7.85e-12	5.74882e-12	1.92835e-11	7.95925e-11	0	0	1.83962e-10	0	0	0	0	0	0	0	0	0	0	0	0	0	0
117.432	44	17	6	2	9	9	3	0	2	2	0	0	0	0	0	0	0	0	0	0	0	0	0	0		2.46817e-12	2.16491e-12	2.25684e-12	2.61667e-12	2.58697e-11	5.78506e-11	4.77555e-11	0	1.67467e-10	3.67924e-10	0	0	0	0	0	0	0	0	0	0	0	0	0	0
118.83	53	11	4	3	4	1	3	2	0	0	0	1	0	0	0	0	0	0	0	0	0	0	0	0		2.97302e-12	1.40083e-12	1.50456e-12	3.925e-12	1.14976e-11	6.42784e-12	4.77555e-11	7.065e-11	0	0	0	6.69867e-10	0	0	0	0	0	0	0	0	0	0	0	0
120.228	46	16	17	3	7	9	5	1	0	2	1	0	1	0	0	0	0	0	0	0	0	0	0	0		2.58036e-12	2.03757e-12	6.39439e-12	3.925e-12	2.01209e-11	5.78506e-11	7.95925e-11	3.5325e-11	0	3.67924e-10	3.59301e-10	0	1.30833e-09	0	0	0	0	0	0	0	0	0	0	0
121.626	51	9	9	3	7	4	3	4	0	2	0	0	0	0	0	0	0	0	0	0	0	0	0	0		2.86083e-12	1.14613e-12	3.38527e-12	3.925e-12	2.01209e-11	2.57114e-11	4.77555e-11	1.413e-10	0	3.67924e-10	0	0	0	0	0	0	0	0	0	0	0	0	0	0
123.024	45	25	12	3	12	13	7	5	2	1	0	1	0	0	0	0	0	0	0	0	0	0	0	0		2.52427e-12	3.1837e-12	4.51369e-12	3.925e-12	3.44929e-11	8.35619e-11	1.11429e-10	1.76625e-10	1.67467e-10	1.83962e-10	0	6.69867e-10	0	0	0	0	0	0	0	0	0	0	0	0
124.422	59	11	6	3	8	4	0	1	0	0	1	0	0	0	0	0	0	0	0	0	0	0	0	0		3.30959e-12	1.40083e-12	2.25684e-12	3.925e-12	2.29953e-11	2.57114e-11	0	3.5325e-11	0	0	3.59301e-10	0	0	0	0	0	0	0	0	0	0	0	0	0
125.82	67	23	9	5	8	7	7	3	2	3	0	0	1	0	0	0	0	0	0	0	0	0	0	0		3.75835e-12	2.929e-12	3.38527e-12	6.54167e-12	2.29953e-11	4.49949e-11	1.11429e-10	1.05975e-10	1.67467e-10	5.51886e-10	0	0	1.30833e-09	0	0	0	0	0	0	0	0	0	0	0
127.218	54	18	17	5	6	4	2	1	0	0	0	0	0	0	0	0	0	0	0	0	0	0	0	0		3.02912e-12	2.29226e-12	6.39439e-12	6.54167e-12	1.72465e-11	2.57114e-11	3.1837e-11	3.5325e-11	0	0	0	0	0	0	0	0	0	0	0	0	0	0	0	0
128.616	44	15	9	4	4	4	2	0	1	0	0	0	0	0	0	0	0	0	0	0	0	0	0	0		2.46817e-12	1.91022e-12	3.38527e-12	5.23333e-12	1.14976e-11	2.57114e-11	3.1837e-11	0	8.37333e-11	0	0	0	0	0	0	0	0	0	0	0	0	0	0	0
130.014	41	14	11	1	2	1	5	1	0	0	0	0	0	0	0	0	0	0	0	0	0	0	0	0		2.29989e-12	1.78287e-12	4.13755e-12	1.30833e-12	5.74882e-12	6.42784e-12	7.95925e-11	3.5325e-11	0	0	0	0	0	0	0	0	0	0	0	0	0	0	0	0
131.412	41	14	6	1	1	2	1	0	0	0	0	0	0	0	1	0	0	0	0	0	0	0	0	0		2.29989e-12	1.78287e-12	2.25684e-12	1.30833e-12	2.87441e-12	1.28557e-11	1.59185e-11	0	0	0	0	0	0	0	3.59007e-09	0	0	0	0	0	0	0	0	0
132.81	37	14	8	1	2	3	1	2	1	0	0	0	0	0	0	0	0	0	0	0	0	0	0	0		2.07551e-12	1.78287e-12	3.00912e-12	1.30833e-12	5.74882e-12	1.92835e-11	1.59185e-11	7.065e-11	8.37333e-11	0	0	0	0	0	0	0	0	0	0	0	0	0	0	0
134.208	40	3	2	4	4	2	3	1	2	3	0	0	0	0	0	0	0	0	0	0	0	0	0	0		2.24379e-12	3.82044e-13	7.52281e-13	5.23333e-12	1.14976e-11	1.28557e-11	4.77555e-11	3.5325e-11	1.67467e-10	5.51886e-10	0	0	0	0	0	0	0	0	0	0	0	0	0	0
135.606	37	4	2	0	3	1	3	0	0	0	0	0	0	0	0	0	0	0	0	0	0	0	0	0		2.07551e-12	5.09392e-13	7.52281e-13	0	8.62323e-12	6.42784e-12	4.77555e-11	0	0	0	0	0	0	0	0	0	0	0	0	0	0	0	0	0
137.004	27	7	0	0	1	1	1	0	1	0	0	0	0	0	0	0	0	0	0	0	0	0	0	0		1.51456e-12	8.91436e-13	0	0	2.87441e-12	6.42784e-12	1.59185e-11	0	8.37333e-11	0	0	0	0	0	0	0	0	0	0	0	0	0	0	0
138.402	33	7	3	1	1	1	2	0	0	0	0	0	0	0	0	0	0	0	0	0	0	0	0	0		1.85113e-12	8.91436e-13	1.12842e-12	1.30833e-12	2.87441e-12	6.42784e-12	3.1837e-11	0	0	0	0	0	0	0	0	0	0	0	0	0	0	0	0	0
139.8	25	1	3	0	0	0	1	0	0	0	0	0	0	0	0	0	0	0	0	0	0	0	0	0		1.40237e-12	1.27348e-13	1.12842e-12	0	0	0	1.59185e-11	0	0	0	0	0	0	0	0	0	0	0	0	0	0	0	0	0
141.198	34	3	2	1	2	0	0	0	0	0	0	0	0	0	0	0	0	0	0	0	0	0	0	0		1.90722e-12	3.82044e-13	7.52281e-13	1.30833e-12	5.74882e-12	0	0	0	0	0	0	0	0	0	0	0	0	0	0	0	0	0	0	0
142.596	31	5	5	1	0	1	2	1	1	2	0	0	0	0	0	0	0	0	0	0	0	0	0	0		1.73894e-12	6.3674e-13	1.8807e-12	1.30833e-12	0	6.42784e-12	3.1837e-11	3.5325e-11	8.37333e-11	3.67924e-10	0	0	0	0	0	0	0	0	0	0	0	0	0	0
143.994	27	4	3	0	0	0	2	1	0	1	0	0	0	0	0	0	0	0	0	0	0	0	0	0		1.51456e-12	5.09392e-13	1.12842e-12	0	0	0	3.1837e-11	3.5325e-11	0	1.83962e-10	0	0	0	0	0	0	0	0	0	0	0	0	0	0
145.392	34	8	2	2	4	2	2	0	1	4	0	1	0	0	0	0	0	0	0	0	0	0	0	0		1.90722e-12	1.01878e-12	7.52281e-13	2.61667e-12	1.14976e-11	1.28557e-11	3.1837e-11	0	8.37333e-11	7.35849e-10	0	6.69867e-10	0	0	0	0	0	0	0	0	0	0	0	0
146.79	37	6	6	0	3	2	0	0	0	0	0	0	0	0	0	0	0	0	0	0	0	0	0	0		2.07551e-12	7.64088e-13	2.25684e-12	0	8.62323e-12	1.28557e-11	0	0	0	0	0	0	0	0	0	0	0	0	0	0	0	0	0	0
148.188	39	4	2	1	0	0	0	1	0	1	0	0	0	0	0	0	0	0	0	0	0	0	0	0		2.1877e-12	5.09392e-13	7.52281e-13	1.30833e-12	0	0	0	3.5325e-11	0	1.83962e-10	0	0	0	0	0	0	0	0	0	0	0	0	0	0
149.586	24	5	3	0	0	0	2	0	0	0	0	0	0	0	0	0	0	0	0	0	0	0	0	0		1.34627e-12	6.3674e-13	1.12842e-12	0	0	0	3.1837e-11	0	0	0	0	0	0	0	0	0	0	0	0	0	0	0	0	0
150.984	27	3	3	0	1	1	2	0	0	0	0	0	0	0	0	0	0	0	0	0	0	0	0	0		1.51456e-12	3.82044e-13	1.12842e-12	0	2.87441e-12	6.42784e-12	3.1837e-11	0	0	0	0	0	0	0	0	0	0	0	0	0	0	0	0	0
152.382	37	5	3	2	3	2	2	3	2	0	0	0	1	0	0	0	0	0	0	0	0	0	0	0		2.07551e-12	6.3674e-13	1.12842e-12	2.61667e-12	8.62323e-12	1.28557e-11	3.1837e-11	1.05975e-10	1.67467e-10	0	0	0	1.30833e-09	0	0	0	0	0	0	0	0	0	0	0
153.78	49	4	3	2	2	0	0	0	0	1	0	0	0	0	0	0	0	0	0	0	0	0	0	0		2.74864e-12	5.09392e-13	1.12842e-12	2.61667e-12	5.74882e-12	0	0	0	0	1.83962e-10	0	0	0	0	0	0	0	0	0	0	0	0	0	0
155.178	37	9	2	1	0	0	0	0	1	0	0	0	0	0	0	0	0	0	0	0	0	0	0	0		2.07551e-12	1.14613e-12	7.52281e-13	1.30833e-12	0	0	0	0	8.37333e-11	0	0	0	0	0	0	0	0	0	0	0	0	0	0	0
156.576	36	6	4	2	1	2	2	2	2	0	1	1	0	0	0	0	0	0	0	0	0	0	0	0		2.01941e-12	7.64088e-13	1.50456e-12	2.61667e-12	2.87441e-12	1.28557e-11	3.1837e-11	7.065e-11	1.67467e-10	0	3.59301e-10	6.69867e-10	0	0	0	0	0	0	0	0	0	0	0	0
157.974	27	2	1	1	3	0	0	1	0	1	0	0	0	1	0	0	0	0	0	0	0	0	0	0		1.51456e-12	2.54696e-13	3.76141e-13	1.30833e-12	8.62323e-12	0	0	3.5325e-11	0	1.83962e-10	0	0	0	2.2608e-09	0	0	0	0	0	0	0	0	0	0
159.372	40	4	6	0	3	3	3	3	0	4	2	5	0	0	0	0	0	0	0	0	0	0	0	0		2.24379e-12	5.09392e-13	2.25684e-12	0	8.62323e-12	1.92835e-11	4.77555e-11	1.05975e-10	0	7.35849e-10	7.18602e-10	3.34933e-09	0	0	0	0	0	0	0	0	0	0	0	0
160.77	33	2	5	1	1	1	0	1	0	0	0	0	0	0	0	0	0	0	0	0	0	0	0	0		1.85113e-12	2.54696e-13	1.8807e-12	1.30833e-12	2.87441e-12	6.42784e-12	0	3.5325e-11	0	0	0	0	0	0	0	0	0	0	0	0	0	0	0	0
162.168	40	8	6	0	2	2	1	2	3	0	1	0	2	0	1	0	0	0	0	0	0	1	0	0		2.24379e-12	1.01878e-12	2.25684e-12	0	5.74882e-12	1.28557e-11	1.59185e-11	7.065e-11	2.512e-10	0	3.59301e-10	0	2.61667e-09	0	3.59007e-09	0	0	0	0	0	0	3.89766e-08	0	0
163.566	32	14	2	6	5	4	6	3	7	3	0	1	0	1	0	0	0	0	0	0	0	0	0	0		1.79503e-12	1.78287e-12	7.52281e-13	7.85e-12	1.4372e-11	2.57114e-11	9.55109e-11	1.05975e-10	5.86133e-10	5.51886e-10	0	6.69867e-10	0	2.2608e-09	0	0	0	0	0	0	0	0	0	0
164.964	29	3	4	0	0	2	1	1	0	2	0	0	0	0	0	0	0	0	0	0	0	0	0	0		1.62675e-12	3.82044e-13	1.50456e-12	0	0	1.28557e-11	1.59185e-11	3.5325e-11	0	3.67924e-10	0	0	0	0	0	0	0	0	0	0	0	0	0	0
166.362	26	7	2	0	0	1	0	1	0	0	0	0	0	0	0	0	0	0	0	0	0	0	0	0		1.45846e-12	8.91436e-13	7.52281e-13	0	0	6.42784e-12	0	3.5325e-11	0	0	0	0	0	0	0	0	0	0	0	0	0	0	0	0
167.76	43	3	2	0	1	0	0	0	0	0	0	0	0	3	2	0	0	0	0	0	0	0	0	0		2.41208e-12	3.82044e-13	7.52281e-13	0	2.87441e-12	0	0	0	0	0	0	0	0	6.7824e-09	7.18013e-09	0	0	0	0	0	0	0	0	0
169.158	37	5	1	0	0	0	0	0	0	0	1	0	0	0	0	0	0	0	0	0	0	0	0	0		2.07551e-12	6.3674e-13	3.76141e-13	0	0	0	0	0	0	0	3.59301e-10	0	0	0	0	0	0	0	0	0	0	0	0	0
170.556	33	5	5	1	0	0	0	0	0	0	1	0	0	0	0	0	0	0	0	0	0	0	0	0		1.85113e-12	6.3674e-13	1.8807e-12	1.30833e-12	0	0	0	0	0	0	3.59301e-10	0	0	0	0	0	0	0	0	0	0	0	0	0
171.954	35	6	1	0	1	1	1	0	0	0	0	0	0	0	0	0	0	0	0	0	0	0	0	0		1.96332e-12	7.64088e-13	3.76141e-13	0	2.87441e-12	6.42784e-12	1.59185e-11	0	0	0	0	0	0	0	0	0	0	0	0	0	0	0	0	0
173.352	31	2	3	1	1	0	1	0	0	0	0	0	0	0	0	0	0	0	0	0	0	0	0	0		1.73894e-12	2.54696e-13	1.12842e-12	1.30833e-12	2.87441e-12	0	1.59185e-11	0	0	0	0	0	0	0	0	0	0	0	0	0	0	0	0	0
174.75	38	3	3	1	3	3	0	0	0	2	2	0	0	0	0	0	0	0	0	0	0	0	0	0		2.1316e-12	3.82044e-13	1.12842e-12	1.30833e-12	8.62323e-12	1.92835e-11	0	0	0	3.67924e-10	7.18602e-10	0	0	0	0	0	0	0	0	0	0	0	0	0
176.148	25	8	0	1	0	2	0	0	0	0	0	1	0	0	0	0	0	0	0	0	0	0	0	0		1.40237e-12	1.01878e-12	0	1.30833e-12	0	1.28557e-11	0	0	0	0	0	6.69867e-10	0	0	0	0	0	0	0	0	0	0	0	0
177.546	38	2	2	2	0	1	0	1	1	0	0	0	0	1	0	0	0	0	0	0	0	0	0	0		2.1316e-12	2.54696e-13	7.52281e-13	2.61667e-12	0	6.42784e-12	0	3.5325e-11	8.37333e-11	0	0	0	0	2.2608e-09	0	0	0	0	0	0	0	0	0	0
178.944	37	3	1	1	2	2	0	1	1	1	0	0	3	1	0	0	1	0	0	0	0	0	0	0		2.07551e-12	3.82044e-13	3.76141e-13	1.30833e-12	5.74882e-12	1.28557e-11	0	3.5325e-11	8.37333e-11	1.83962e-10	0	0	3.925e-09	2.2608e-09	0	0	7.6302e-09	0	0	0	0	0	0	0
180.342	27	5	1	2	3	2	2	1	1	1	2	0	0	0	0	0	0	0	0	0	0	0	0	0		1.51456e-12	6.3674e-13	3.76141e-13	2.61667e-12	8.62323e-12	1.28557e-11	3.1837e-11	3.5325e-11	8.37333e-11	1.83962e-10	7.18602e-10	0	0	0	0	0	0	0	0	0	0	0	0	0
181.74	31	5	2	0	0	1	1	0	2	2	0	0	3	0	0	0	0	0	0	0	0	0	0	0		1.73894e-12	6.3674e-13	7.52281e-13	0	0	6.42784e-12	1.59185e-11	0	1.67467e-10	3.67924e-10	0	0	3.925e-09	0	0	0	0	0	0	0	0	0	0	0
183.138	37	8	3	0	1	1	1	1	0	0	0	0	0	0	0	0	0	0	0	0	0	0	0	0		2.07551e-12	1.01878e-12	1.12842e-12	0	2.87441e-12	6.42784e-12	1.59185e-11	3.5325e-11	0	0	0	0	0	0	0	0	0	0	0	0	0	0	0	0
184.536	33	9	1	1	0	0	2	0	0	0	0	0	0	0	0	0	0	1	0	0	0	0	0	0		1.85113e-12	1.14613e-12	3.76141e-13	1.30833e-12	0	0	3.1837e-11	0	0	0	0	0	0	0	0	0	0	1.04667e-08	0	0	0	0	0	0
185.934	27	1	2	0	0	0	1	2	1	0	1	1	0	1	0	0	0	0	0	0	0	0	0	0		1.51456e-12	1.27348e-13	7.52281e-13	0	0	0	1.59185e-11	7.065e-11	8.37333e-11	0	3.59301e-10	6.69867e-10	0	2.2608e-09	0	0	0	0	0	0	0	0	0	0
187.332	31	6	2	1	0	1	1	0	0	0	1	0	0	0	0	0	0	0	0	0	0	0	0	0		1.73894e-12	7.64088e-13	7.52281e-13	1.30833e-12	0	6.42784e-12	1.59185e-11	0	0	0	3.59301e-10	0	0	0	0	0	0	0	0	0	0	0	0	0
188.73	25	4	0	0	1	1	0	0	0	0	0	0	0	0	0	0	0	0	0	0	0	0	0	0		1.40237e-12	5.09392e-13	0	0	2.87441e-12	6.42784e-12	0	0	0	0	0	0	0	0	0	0	0	0	0	0	0	0	0	0
190.128	30	6	2	0	0	4	1	0	1	0	0	0	0	0	0	0	0	0	0	0	0	0	0	0		1.68284e-12	7.64088e-13	7.52281e-13	0	0	2.57114e-11	1.59185e-11	0	8.37333e-11	0	0	0	0	0	0	0	0	0	0	0	0	0	0	0
191.526	38	5	3	0	2	2	2	2	2	0	0	1	0	0	0	0	0	0	0	0	0	0	0	0		2.1316e-12	6.3674e-13	1.12842e-12	0	5.74882e-12	1.28557e-11	3.1837e-11	7.065e-11	1.67467e-10	0	0	6.69867e-10	0	0	0	0	0	0	0	0	0	0	0	0
192.924	38	14	2	0	6	6	10	7	7	6	2	1	0	1	0	0	0	0	0	0	0	0	0	0		2.1316e-12	1.78287e-12	7.52281e-13	0	1.72465e-11	3.8567e-11	1.59185e-10	2.47275e-10	5.86133e-10	1.10377e-09	7.18602e-10	6.69867e-10	0	2.2608e-09	0	0	0	0	0	0	0	0	0	0
194.322	27	7	5	1	1	1	7	2	5	3	0	0	0	0	0	0	0	0	0	0	0	0	0	0		1.51456e-12	8.91436e-13	1.8807e-12	1.30833e-12	2.87441e-12	6.42784e-12	1.11429e-10	7.065e-11	4.18667e-10	5.51886e-10	0	0	0	0	0	0	0	0	0	0	0	0	0	0
195.72	35	3	3	1	0	3	1	2	5	0	1	0	0	1	0	0	0	0	0	0	0	0	0	0		1.96332e-12	3.82044e-13	1.12842e-12	1.30833e-12	0	1.92835e-11	1.59185e-11	7.065e-11	4.18667e-10	0	3.59301e-10	0	0	2.2608e-09	0	0	0	0	0	0	0	0	0	0
197.118	30	5	1	0	2	2	0	1	0	0	0	0	2	0	0	0	0	0	0	0	0	0	0	0		1.68284e-12	6.3674e-13	3.76141e-13	0	5.74882e-12	1.28557e-11	0	3.5325e-11	0	0	0	0	2.61667e-09	0	0	0	0	0	0	0	0	0	0	0
198.516	27	3	6	2	0	1	0	0	0	1	0	0	0	0	0	0	0	0	0	0	0	0	0	0		1.51456e-12	3.82044e-13	2.25684e-12	2.61667e-12	0	6.42784e-12	0	0	0	1.83962e-10	0	0	0	0	0	0	0	0	0	0	0	0	0	0
199.914	32	4	4	0	1	0	0	0	0	0	0	0	1	0	0	0	0	0	0	0	0	0	0	0		1.79503e-12	5.09392e-13	1.50456e-12	0	2.87441e-12	0	0	0	0	0	0	0	1.30833e-09	0	0	0	0	0	0	0	0	0	0	0
201.312	33	5	1	2	1	1	0	0	0	0	0	0	0	0	0	0	0	0	0	0	0	0	0	0		1.85113e-12	6.3674e-13	3.76141e-13	2.61667e-12	2.87441e-12	6.42784e-12	0	0	0	0	0	0	0	0	0	0	0	0	0	0	0	0	0	0
202.71	47	8	2	2	1	0	0	1	0	0	3	1	0	0	0	0	0	0	0	0	0	0	0	0		2.63646e-12	1.01878e-12	7.52281e-13	2.61667e-12	2.87441e-12	0	0	3.5325e-11	0	0	1.0779e-09	6.69867e-10	0	0	0	0	0	0	0	0	0	0	0	0
204.108	35	4	2	0	0	1	0	0	0	0	0	0	0	0	0	0	0	0	0	0	0	0	0	0		1.96332e-12	5.09392e-13	7.52281e-13	0	0	6.42784e-12	0	0	0	0	0	0	0	0	0	0	0	0	0	0	0	0	0	0
205.506	43	3	1	0	0	1	2	0	0	0	0	0	0	0	0	0	0	0	0	0	0	0	0	0		2.41208e-12	3.82044e-13	3.76141e-13	0	0	6.42784e-12	3.1837e-11	0	0	0	0	0	0	0	0	0	0	0	0	0	0	0	0	0
206.904	37	2	2	2	1	1	1	0	0	0	0	0	0	0	0	0	0	0	0	0	0	0	0	0		2.07551e-12	2.54696e-13	7.52281e-13	2.61667e-12	2.87441e-12	6.42784e-12	1.59185e-11	0	0	0	0	0	0	0	0	0	0	0	0	0	0	0	0	0
208.302	30	4	3	0	3	1	1	1	1	0	0	0	0	0	0	0	0	0	0	0	0	0	0	0		1.68284e-12	5.09392e-13	1.12842e-12	0	8.62323e-12	6.42784e-12	1.59185e-11	3.5325e-11	8.37333e-11	0	0	0	0	0	0	0	0	0	0	0	0	0	0	0
209.7	30	4	1	0	2	0	0	0	1	0	0	0	0	0	0	0	0	0	0	0	0	0	0	0		1.68284e-12	5.09392e-13	3.76141e-13	0	5.74882e-12	0	0	0	8.37333e-11	0	0	0	0	0	0	0	0	0	0	0	0	0	0	0
211.098	35	4	2	0	0	1	0	0	1	1	3	0	0	0	0	0	0	0	0	0	0	0	0	0		1.96332e-12	5.09392e-13	7.52281e-13	0	0	6.42784e-12	0	0	8.37333e-11	1.83962e-10	1.0779e-09	0	0	0	0	0	0	0	0	0	0	0	0	0
212.496	30	5	1	1	0	3	2	1	1	0	0	0	0	0	0	0	0	0	0	0	0	0	0	0		1.68284e-12	6.3674e-13	3.76141e-13	1.30833e-12	0	1.92835e-11	3.1837e-11	3.5325e-11	8.37333e-11	0	0	0	0	0	0	0	0	0	0	0	0	0	0	0
213.894	33	6	1	0	1	0	0	1	0	0	0	0	0	0	0	0	0	0	0	0	0	0	0	0		1.85113e-12	7.64088e-13	3.76141e-13	0	2.87441e-12	0	0	3.5325e-11	0	0	0	0	0	0	0	0	0	0	0	0	0	0	0	0
215.292	26	2	2	1	2	0	1	0	0	0	0	0	0	1	0	0	0	0	0	0	0	0	0	0		1.45846e-12	2.54696e-13	7.52281e-13	1.30833e-12	5.74882e-12	0	1.59185e-11	0	0	0	0	0	0	2.2608e-09	0	0	0	0	0	0	0	0	0	0
216.69	34	3	1	2	1	1	2	1	2	0	1	0	0	0	0	0	0	0	0	0	0	0	0	0		1.90722e-12	3.82044e-13	3.76141e-13	2.61667e-12	2.87441e-12	6.42784e-12	3.1837e-11	3.5325e-11	1.67467e-10	0	3.59301e-10	0	0	0	0	0	0	0	0	0	0	0	0	0
218.088	37	6	2	1	3	0	1	0	0	1	0	0	0	0	0	0	0	0	0	0	0	0	0	0		2.07551e-12	7.64088e-13	7.52281e-13	1.30833e-12	8.62323e-12	0	1.59185e-11	0	0	1.83962e-10	0	0	0	0	0	0	0	0	0	0	0	0	0	0
219.486	34	6	3	0	0	2	0	0	0	0	0	0	0	1	0	0	0	0	0	0	0	0	0	0		1.90722e-12	7.64088e-13	1.12842e-12	0	0	1.28557e-11	0	0	0	0	0	0	0	2.2608e-09	0	0	0	0	0	0	0	0	0	0
220.884	25	6	1	1	3	1	1	0	0	0	0	0	0	0	0	0	0	0	0	0	0	0	0	0		1.40237e-12	7.64088e-13	3.76141e-13	1.30833e-12	8.62323e-12	6.42784e-12	1.59185e-11	0	0	0	0	0	0	0	0	0	0	0	0	0	0	0	0	0
222.282	34	3	3	0	0	2	0	1	0	1	1	0	0	0	0	0	0	0	0	0	0	0	0	0		1.90722e-12	3.82044e-13	1.12842e-12	0	0	1.28557e-11	0	3.5325e-11	0	1.83962e-10	3.59301e-10	0	0	0	0	0	0	0	0	0	0	0	0	0
223.68	24	6	2	2	0	0	1	0	2	0	0	2	0	0	0	0	0	0	0	0	0	0	0	0		1.34627e-12	7.64088e-13	7.52281e-13	2.61667e-12	0	0	1.59185e-11	0	1.67467e-10	0	0	1.33973e-09	0	0	0	0	0	0	0	0	0	0	0	0
225.078	20	4	0	3	2	2	1	1	2	1	1	1	0	0	0	0	0	0	0	0	0	0	0	0		1.1219e-12	5.09392e-13	0	3.925e-12	5.74882e-12	1.28557e-11	1.59185e-11	3.5325e-11	1.67467e-10	1.83962e-10	3.59301e-10	6.69867e-10	0	0	0	0	0	0	0	0	0	0	0	0
226.476	28	2	1	0	1	1	1	0	1	0	1	0	0	0	0	0	0	0	0	0	0	0	0	0		1.57065e-12	2.54696e-13	3.76141e-13	0	2.87441e-12	6.42784e-12	1.59185e-11	0	8.37333e-11	0	3.59301e-10	0	0	0	0	0	0	0	0	0	0	0	0	0
227.874	34	8	1	0	1	3	1	1	0	0	1	0	0	0	0	0	0	0	0	0	0	0	0	0		1.90722e-12	1.01878e-12	3.76141e-13	0	2.87441e-12	1.92835e-11	1.59185e-11	3.5325e-11	0	0	3.59301e-10	0	0	0	0	0	0	0	0	0	0	0	0	0
229.272	34	3	4	2	3	2	3	1	1	0	1	1	0	0	0	0	0	0	0	0	0	0	0	0		1.90722e-12	3.82044e-13	1.50456e-12	2.61667e-12	8.62323e-12	1.28557e-11	4.77555e-11	3.5325e-11	8.37333e-11	0	3.59301e-10	6.69867e-10	0	0	0	0	0	0	0	0	0	0	0	0
230.67	43	11	9	5	16	14	12	5	6	8	3	1	2	0	1	0	0	0	0	0	0	0	0	0		2.41208e-12	1.40083e-12	3.38527e-12	6.54167e-12	4.59905e-11	8.99898e-11	1.91022e-10	1.76625e-10	5.024e-10	1.4717e-09	1.0779e-09	6.69867e-10	2.61667e-09	0	3.59007e-09	0	0	0	0	0	0	0	0	0
232.068	53	23	15	7	16	12	12	10	6	3	0	3	0	0	0	0	0	0	0	0	0	0	0	0		2.97302e-12	2.929e-12	5.64211e-12	9.15833e-12	4.59905e-11	7.71341e-11	1.91022e-10	3.5325e-10	5.024e-10	5.51886e-10	0	2.0096e-09	0	0	0	0	0	0	0	0	0	0	0	0
233.466	43	39	19	16	22	19	22	12	9	4	3	2	1	0	0	0	0	0	0	0	0	0	0	0		2.41208e-12	4.96657e-12	7.14667e-12	2.09333e-11	6.3237e-11	1.22129e-10	3.50207e-10	4.239e-10	7.536e-10	7.35849e-10	1.0779e-09	1.33973e-09	1.30833e-09	0	0	0	0	0	0	0	0	0	0	0
234.864	49	24	16	9	21	11	8	7	5	5	1	0	0	0	0	0	0	0	0	0	0	0	0	0		2.74864e-12	3.05635e-12	6.01825e-12	1.1775e-11	6.03626e-11	7.07063e-11	1.27348e-10	2.47275e-10	4.18667e-10	9.19811e-10	3.59301e-10	0	0	0	0	0	0	0	0	0	0	0	0	0
236.262	25	20	13	7	13	18	18	8	7	0	0	1	0	1	0	0	0	0	0	0	0	0	0	0		1.40237e-12	2.54696e-12	4.88983e-12	9.15833e-12	3.73673e-11	1.15701e-10	2.86533e-10	2.826e-10	5.86133e-10	0	0	6.69867e-10	0	2.2608e-09	0	0	0	0	0	0	0	0	0	0
237.66	45	29	22	7	15	20	14	6	7	5	3	1	0	1	0	0	0	0	0	0	0	0	0	0		2.52427e-12	3.69309e-12	8.27509e-12	9.15833e-12	4.31161e-11	1.28557e-10	2.22859e-10	2.1195e-10	5.86133e-10	9.19811e-10	1.0779e-09	6.69867e-10	0	2.2608e-09	0	0	0	0	0	0	0	0	0	0
239.058	27	11	3	1	3	4	2	2	5	3	2	2	2	0	0	0	0	0	0	0	0	0	0	0		1.51456e-12	1.40083e-12	1.12842e-12	1.30833e-12	8.62323e-12	2.57114e-11	3.1837e-11	7.065e-11	4.18667e-10	5.51886e-10	7.18602e-10	1.33973e-09	2.61667e-09	0	0	0	0	0	0	0	0	0	0	0
240.456	34	4	1	1	1	2	4	0	1	0	1	0	1	1	0	0	0	0	0	0	0	0	0	0		1.90722e-12	5.09392e-13	3.76141e-13	1.30833e-12	2.87441e-12	1.28557e-11	6.3674e-11	0	8.37333e-11	0	3.59301e-10	0	1.30833e-09	2.2608e-09	0	0	0	0	0	0	0	0	0	0
241.854	34	6	1	1	0	1	2	0	1	0	0	0	0	0	0	0	0	0	0	0	0	0	0	0		1.90722e-12	7.64088e-13	3.76141e-13	1.30833e-12	0	6.42784e-12	3.1837e-11	0	8.37333e-11	0	0	0	0	0	0	0	0	0	0	0	0	0	0	0
243.252	31	11	6	1	4	3	3	1	5	0	1	0	0	0	0	0	0	0	0	0	0	0	0	0		1.73894e-12	1.40083e-12	2.25684e-12	1.30833e-12	1.14976e-11	1.92835e-11	4.77555e-11	3.5325e-11	4.18667e-10	0	3.59301e-10	0	0	0	0	0	0	0	0	0	0	0	0	0
244.65	34	14	6	2	5	9	3	2	3	5	0	0	0	0	0	0	0	0	0	0	0	0	0	0		1.90722e-12	1.78287e-12	2.25684e-12	2.61667e-12	1.4372e-11	5.78506e-11	4.77555e-11	7.065e-11	2.512e-10	9.19811e-10	0	0	0	0	0	0	0	0	0	0	0	0	0	0
246.048	41	15	12	4	10	10	9	4	1	2	0	0	0	0	0	0	0	0	0	0	0	0	0	0		2.29989e-12	1.91022e-12	4.51369e-12	5.23333e-12	2.87441e-11	6.42784e-11	1.43266e-10	1.413e-10	8.37333e-11	3.67924e-10	0	0	0	0	0	0	0	0	0	0	0	0	0	0
247.446	38	23	14	9	10	15	12	7	7	3	2	0	0	0	1	0	0	0	0	0	0	0	0	0		2.1316e-12	2.929e-12	5.26597e-12	1.1775e-11	2.87441e-11	9.64176e-11	1.91022e-10	2.47275e-10	5.86133e-10	5.51886e-10	7.18602e-10	0	0	0	3.59007e-09	0	0	0	0	0	0	0	0	0
248.844	37	18	8	7	16	8	13	5	1	1	0	0	0	0	0	0	0	0	0	0	0	0	0	0		2.07551e-12	2.29226e-12	3.00912e-12	9.15833e-12	4.59905e-11	5.14227e-11	2.0694e-10	1.76625e-10	8.37333e-11	1.83962e-10	0	0	0	0	0	0	0	0	0	0	0	0	0	0
250.242	55	31	19	11	16	14	23	7	10	2	3	0	0	0	0	0	0	0	0	0	0	0	0	0		3.08521e-12	3.94779e-12	7.14667e-12	1.43917e-11	4.59905e-11	8.99898e-11	3.66125e-10	2.47275e-10	8.37333e-10	3.67924e-10	1.0779e-09	0	0	0	0	0	0	0	0	0	0	0	0	0
251.64	34	8	9	7	6	10	9	2	3	1	0	0	0	0	0	0	0	0	0	0	0	0	0	0		1.90722e-12	1.01878e-12	3.38527e-12	9.15833e-12	1.72465e-11	6.42784e-11	1.43266e-10	7.065e-11	2.512e-10	1.83962e-10	0	0	0	0	0	0	0	0	0	0	0	0	0	0
253.038	36	12	6	3	5	5	6	5	0	3	2	1	0	0	0	0	0	0	0	0	0	0	0	0		2.01941e-12	1.52818e-12	2.25684e-12	3.925e-12	1.4372e-11	3.21392e-11	9.55109e-11	1.76625e-10	0	5.51886e-10	7.18602e-10	6.69867e-10	0	0	0	0	0	0	0	0	0	0	0	0
254.436	33	7	3	0	0	3	2	1	1	1	0	0	0	0	0	0	0	0	0	0	0	0	0	0		1.85113e-12	8.91436e-13	1.12842e-12	0	0	1.92835e-11	3.1837e-11	3.5325e-11	8.37333e-11	1.83962e-10	0	0	0	0	0	0	0	0	0	0	0	0	0	0
255.834	33	4	3	1	0	0	1	0	0	0	0	0	1	1	2	0	0	0	0	0	0	0	0	0		1.85113e-12	5.09392e-13	1.12842e-12	1.30833e-12	0	0	1.59185e-11	0	0	0	0	0	1.30833e-09	2.2608e-09	7.18013e-09	0	0	0	0	0	0	0	0	0
257.232	34	3	3	0	1	1	0	1	1	0	1	0	0	0	0	0	0	0	0	0	0	0	0	0		1.90722e-12	3.82044e-13	1.12842e-12	0	2.87441e-12	6.42784e-12	0	3.5325e-11	8.37333e-11	0	3.59301e-10	0	0	0	0	0	0	0	0	0	0	0	0	0
258.63	38	4	1	0	0	1	1	0	1	0	0	0	0	0	0	0	0	0	0	0	0	0	0	0		2.1316e-12	5.09392e-13	3.76141e-13	0	0	6.42784e-12	1.59185e-11	0	8.37333e-11	0	0	0	0	0	0	0	0	0	0	0	0	0	0	0
260.028	30	7	2	2	1	2	3	0	1	1	0	0	0	0	0	0	0	0	0	0	0	0	0	0		1.68284e-12	8.91436e-13	7.52281e-13	2.61667e-12	2.87441e-12	1.28557e-11	4.77555e-11	0	8.37333e-11	1.83962e-10	0	0	0	0	0	0	0	0	0	0	0	0	0	0
261.426	40	4	1	1	3	1	0	0	0	0	0	0	0	0	0	0	0	0	0	0	0	0	0	0		2.24379e-12	5.09392e-13	3.76141e-13	1.30833e-12	8.62323e-12	6.42784e-12	0	0	0	0	0	0	0	0	0	0	0	0	0	0	0	0	0	0
262.824	26	5	3	0	2	2	0	1	0	0	0	1	0	0	0	0	0	0	0	0	0	0	0	0		1.45846e-12	6.3674e-13	1.12842e-12	0	5.74882e-12	1.28557e-11	0	3.5325e-11	0	0	0	6.69867e-10	0	0	0	0	0	0	0	0	0	0	0	0
264.222	45	6	2	0	2	2	3	0	1	0	1	0	0	0	0	0	0	0	0	0	0	0	0	0		2.52427e-12	7.64088e-13	7.52281e-13	0	5.74882e-12	1.28557e-11	4.77555e-11	0	8.37333e-11	0	3.59301e-10	0	0	0	0	0	0	0	0	0	0	0	0	0
265.62	31	4	1	0	0	2	0	0	1	0	0	0	1	0	0	0	0	0	0	0	0	0	0	0		1.73894e-12	5.09392e-13	3.76141e-13	0	0	1.28557e-11	0	0	8.37333e-11	0	0	0	1.30833e-09	0	0	0	0	0	0	0	0	0	0	0
267.018	30	2	8	2	1	2	2	2	2	2	4	1	0	0	0	0	0	0	0	0	0	0	0	0		1.68284e-12	2.54696e-13	3.00912e-12	2.61667e-12	2.87441e-12	1.28557e-11	3.1837e-11	7.065e-11	1.67467e-10	3.67924e-10	1.4372e-09	6.69867e-10	0	0	0	0	0	0	0	0	0	0	0	0
268.416	33	7	2	1	2	1	5	2	3	0	0	0	0	0	0	0	1	0	0	0	0	0	0	0		1.85113e-12	8.91436e-13	7.52281e-13	1.30833e-12	5.74882e-12	6.42784e-12	7.95925e-11	7.065e-11	2.512e-10	0	0	0	0	0	0	0	7.6302e-09	0	0	0	0	0	0	0
269.814	29	3	4	2	0	1	2	0	0	1	0	0	0	0	0	0	0	0	0	0	0	0	0	0		1.62675e-12	3.82044e-13	1.50456e-12	2.61667e-12	0	6.42784e-12	3.1837e-11	0	0	1.83962e-10	0	0	0	0	0	0	0	0	0	0	0	0	0	0
271.212	32	3	2	1	1	0	0	0	0	0	0	0	0	0	0	0	0	0	0	0	0	0	0	0		1.79503e-12	3.82044e-13	7.52281e-13	1.30833e-12	2.87441e-12	0	0	0	0	0	0	0	0	0	0	0	0	0	0	0	0	0	0	0
272.61	27	4	1	0	0	1	0	0	0	0	0	0	0	0	0	0	0	0	0	0	0	0	0	0		1.51456e-12	5.09392e-13	3.76141e-13	0	0	6.42784e-12	0	0	0	0	0	0	0	0	0	0	0	0	0	0	0	0	0	0
274.008	38	7	1	0	0	2	0	0	1	0	0	1	0	0	0	0	0	0	0	0	0	0	0	0		2.1316e-12	8.91436e-13	3.76141e-13	0	0	1.28557e-11	0	0	8.37333e-11	0	0	6.69867e-10	0	0	0	0	0	0	0	0	0	0	0	0
275.406	39	2	1	0	2	1	0	0	1	0	1	0	0	0	0	0	0	0	0	0	0	0	0	0		2.1877e-12	2.54696e-13	3.76141e-13	0	5.74882e-12	6.42784e-12	0	0	8.37333e-11	0	3.59301e-10	0	0	0	0	0	0	0	0	0	0	0	0	0
276.804	29	2	2	1	3	0	1	1	0	1	0	0	0	0	0	0	0	0	0	0	0	0	0	0		1.62675e-12	2.54696e-13	7.52281e-13	1.30833e-12	8.62323e-12	0	1.59185e-11	3.5325e-11	0	1.83962e-10	0	0	0	0	0	0	0	0	0	0	0	0	0	0
278.202	37	6	3	0	1	0	0	1	1	0	0	0	1	0	0	0	0	0	0	0	0	0	0	0		2.07551e-12	7.64088e-13	1.12842e-12	0	2.87441e-12	0	0	3.5325e-11	8.37333e-11	0	0	0	1.30833e-09	0	0	0	0	0	0	0	0	0	0	0
279.6	30	6	2	1	3	1	0	1	1	0	1	0	1	0	0	0	0	0	0	0	0	0	0	0		1.68284e-12	7.64088e-13	7.52281e-13	1.30833e-12	8.62323e-12	6.42784e-12	0	3.5325e-11	8.37333e-11	0	3.59301e-10	0	1.30833e-09	0	0	0	0	0	0	0	0	0	0	0
280.998	31	3	1	1	0	0	0	0	0	0	0	0	0	0	0	0	0	0	0	0	0	0	0	0		1.73894e-12	3.82044e-13	3.76141e-13	1.30833e-12	0	0	0	0	0	0	0	0	0	0	0	0	0	0	0	0	0	0	0	0
282.396	41	2	1	0	1	0	1	0	0	0	0	0	0	0	0	0	0	0	0	0	0	0	0	0		2.29989e-12	2.54696e-13	3.76141e-13	0	2.87441e-12	0	1.59185e-11	0	0	0	0	0	0	0	0	0	0	0	0	0	0	0	0	0
283.794	32	4	0	0	1	1	0	1	1	1	0	1	0	0	0	0	0	0	0	0	0	0	0	0		1.79503e-12	5.09392e-13	0	0	2.87441e-12	6.42784e-12	0	3.5325e-11	8.37333e-11	1.83962e-10	0	6.69867e-10	0	0	0	0	0	0	0	0	0	0	0	0
285.192	25	2	1	2	0	0	0	0	0	0	0	0	0	0	0	0	0	0	0	0	0	0	0	0		1.40237e-12	2.54696e-13	3.76141e-13	2.61667e-12	0	0	0	0	0	0	0	0	0	0	0	0	0	0	0	0	0	0	0	0
286.59	27	3	0	0	1	0	1	0	0	0	0	0	0	0	0	0	0	0	0	0	0	0	0	0		1.51456e-12	3.82044e-13	0	0	2.87441e-12	0	1.59185e-11	0	0	0	0	0	0	0	0	0	0	0	0	0	0	0	0	0
287.988	32	5	3	0	1	0	0	0	0	1	0	0	0	0	0	0	0	0	0	0	0	0	0	0		1.79503e-12	6.3674e-13	1.12842e-12	0	2.87441e-12	0	0	0	0	1.83962e-10	0	0	0	0	0	0	0	0	0	0	0	0	0	0
289.386	29	4	3	0	0	1	0	0	0	0	0	1	0	0	0	0	0	0	0	0	0	0	0	0		1.62675e-12	5.09392e-13	1.12842e-12	0	0	6.42784e-12	0	0	0	0	0	6.69867e-10	0	0	0	0	0	0	0	0	0	0	0	0
290.784	32	1	2	1	2	1	0	0	0	0	0	0	0	0	0	0	0	0	0	0	0	0	0	0		1.79503e-12	1.27348e-13	7.52281e-13	1.30833e-12	5.74882e-12	6.42784e-12	0	0	0	0	0	0	0	0	0	0	0	0	0	0	0	0	0	0
292.182	25	4	0	0	4	1	0	0	1	0	0	0	0	0	0	0	0	0	0	0	0	0	0	0		1.40237e-12	5.09392e-13	0	0	1.14976e-11	6.42784e-12	0	0	8.37333e-11	0	0	0	0	0	0	0	0	0	0	0	0	0	0	0
293.58	27	5	4	0	0	1	0	0	0	0	0	0	0	0	0	0	0	0	0	0	0	0	0	0		1.51456e-12	6.3674e-13	1.50456e-12	0	0	6.42784e-12	0	0	0	0	0	0	0	0	0	0	0	0	0	0	0	0	0	0
294.978	32	3	1	1	2	0	1	2	0	0	0	0	0	0	0	0	0	0	0	0	0	0	0	0		1.79503e-12	3.82044e-13	3.76141e-13	1.30833e-12	5.74882e-12	0	1.59185e-11	7.065e-11	0	0	0	0	0	0	0	0	0	0	0	0	0	0	0	0
296.376	30	5	0	0	0	0	0	0	0	0	0	0	0	0	0	0	0	0	0	0	0	0	0	0		1.68284e-12	6.3674e-13	0	0	0	0	0	0	0	0	0	0	0	0	0	0	0	0	0	0	0	0	0	0
297.774	39	4	1	0	1	1	1	0	0	0	0	0	0	0	0	0	0	0	0	0	0	0	0	0		2.1877e-12	5.09392e-13	3.76141e-13	0	2.87441e-12	6.42784e-12	1.59185e-11	0	0	0	0	0	0	0	0	0	0	0	0	0	0	0	0	0
299.172	42	4	0	2	2	0	0	0	0	0	0	0	0	0	0	0	0	0	0	0	0	0	0	0		2.35598e-12	5.09392e-13	0	2.61667e-12	5.74882e-12	0	0	0	0	0	0	0	0	0	0	0	0	0	0	0	0	0	0	0
300.57	31	2	3	0	1	0	0	0	0	0	0	0	0	0	0	0	0	0	0	0	0	0	0	0		1.73894e-12	2.54696e-13	1.12842e-12	0	2.87441e-12	0	0	0	0	0	0	0	0	0	0	0	0	0	0	0	0	0	0	0
301.968	35	8	2	1	2	0	0	0	0	0	0	0	1	0	0	0	0	0	0	0	0	0	0	0		1.96332e-12	1.01878e-12	7.52281e-13	1.30833e-12	5.74882e-12	0	0	0	0	0	0	0	1.30833e-09	0	0	0	0	0	0	0	0	0	0	0
303.366	35	6	0	0	0	1	0	0	0	0	1	0	0	0	0	0	0	0	0	0	0	0	0	0		1.96332e-12	7.64088e-13	0	0	0	6.42784e-12	0	0	0	0	3.59301e-10	0	0	0	0	0	0	0	0	0	0	0	0	0
304.764	34	4	3	3	1	1	2	0	0	0	0	0	0	0	0	0	0	0	0	0	0	0	0	0		1.90722e-12	5.09392e-13	1.12842e-12	3.925e-12	2.87441e-12	6.42784e-12	3.1837e-11	0	0	0	0	0	0	0	0	0	0	0	0	0	0	0	0	0
306.162	39	6	4	1	0	0	0	1	1	0	0	0	0	0	0	0	0	0	0	0	0	0	0	0		2.1877e-12	7.64088e-13	1.50456e-12	1.30833e-12	0	0	0	3.5325e-11	8.37333e-11	0	0	0	0	0	0	0	0	0	0	0	0	0	0	0
307.56	31	4	6	1	0	0	0	2	0	0	0	0	0	0	0	0	0	0	0	0	0	0	0	0		1.73894e-12	5.09392e-13	2.25684e-12	1.30833e-12	0	0	0	7.065e-11	0	0	0	0	0	0	0	0	0	0	0	0	0	0	0	0
308.958	41	5	2	0	0	0	1	0	0	0	0	0	0	0	0	0	0	0	0	0	0	0	0	0		2.29989e-12	6.3674e-13	7.52281e-13	0	0	0	1.59185e-11	0	0	0	0	0	0	0	0	0	0	0	0	0	0	0	0	0
310.356	32	3	2	0	0	0	0	1	0	0	0	0	0	0	0	0	0	0	0	0	0	0	0	0		1.79503e-12	3.82044e-13	7.52281e-13	0	0	0	0	3.5325e-11	0	0	0	0	0	0	0	0	0	0	0	0	0	0	0	0
311.754	39	4	2	0	0	1	0	0	1	0	0	0	0	0	0	0	0	0	0	0	0	0	0	0		2.1877e-12	5.09392e-13	7.52281e-13	0	0	6.42784e-12	0	0	8.37333e-11	0	0	0	0	0	0	0	0	0	0	0	0	0	0	0
313.152	35	8	0	0	1	0	0	0	0	0	0	0	0	0	0	0	0	0	0	0	0	0	0	0		1.96332e-12	1.01878e-12	0	0	2.87441e-12	0	0	0	0	0	0	0	0	0	0	0	0	0	0	0	0	0	0	0
314.55	32	1	4	0	1	0	1	1	0	0	0	0	0	0	0	0	0	0	0	0	0	0	0	0		1.79503e-12	1.27348e-13	1.50456e-12	0	2.87441e-12	0	1.59185e-11	3.5325e-11	0	0	0	0	0	0	0	0	0	0	0	0	0	0	0	0
315.948	29	4	0	0	0	0	0	1	0	0	0	0	0	0	0	0	0	0	0	0	0	0	0	0		1.62675e-12	5.09392e-13	0	0	0	0	0	3.5325e-11	0	0	0	0	0	0	0	0	0	0	0	0	0	0	0	0
317.346	28	2	4	0	0	1	0	0	0	0	0	0	0	0	0	0	0	0	0	0	0	0	0	0		1.57065e-12	2.54696e-13	1.50456e-12	0	0	6.42784e-12	0	0	0	0	0	0	0	0	0	0	0	0	0	0	0	0	0	0
318.744	45	1	2	0	0	0	0	0	1	0	0	0	0	0	0	0	0	0	0	0	0	0	0	0		2.52427e-12	1.27348e-13	7.52281e-13	0	0	0	0	0	8.37333e-11	0	0	0	0	0	0	0	0	0	0	0	0	0	0	0
320.142	40	4	2	0	0	2	0	2	2	0	1	0	0	0	0	0	0	0	0	0	0	0	0	0		2.24379e-12	5.09392e-13	7.52281e-13	0	0	1.28557e-11	0	7.065e-11	1.67467e-10	0	3.59301e-10	0	0	0	0	0	0	0	0	0	0	0	0	0
321.54	31	5	3	1	1	2	0	0	0	0	0	0	0	0	0	0	0	0	0	0	0	0	0	0		1.73894e-12	6.3674e-13	1.12842e-12	1.30833e-12	2.87441e-12	1.28557e-11	0	0	0	0	0	0	0	0	0	0	0	0	0	0	0	0	0	0
322.938	38	5	2	2	0	0	1	1	0	0	0	0	0	0	0	0	0	0	0	0	0	0	0	0		2.1316e-12	6.3674e-13	7.52281e-13	2.61667e-12	0	0	1.59185e-11	3.5325e-11	0	0	0	0	0	0	0	0	0	0	0	0	0	0	0	0
324.336	34	7	2	0	2	1	0	0	1	0	0	0	0	0	0	0	0	0	0	0	0	0	0	0		1.90722e-12	8.91436e-13	7.52281e-13	0	5.74882e-12	6.42784e-12	0	0	8.37333e-11	0	0	0	0	0	0	0	0	0	0	0	0	0	0	0
325.734	39	4	1	2	0	0	0	0	0	0	0	0	0	0	0	0	0	0	0	0	0	0	0	0		2.1877e-12	5.09392e-13	3.76141e-13	2.61667e-12	0	0	0	0	0	0	0	0	0	0	0	0	0	0	0	0	0	0	0	0
327.132	30	4	2	1	0	1	0	0	0	0	0	0	0	0	0	0	0	0	0	0	0	0	0	0		1.68284e-12	5.09392e-13	7.52281e-13	1.30833e-12	0	6.42784e-12	0	0	0	0	0	0	0	0	0	0	0	0	0	0	0	0	0	0
328.53	28	4	0	0	2	0	0	0	1	0	0	0	0	0	0	0	0	0	0	0	0	0	0	0		1.57065e-12	5.09392e-13	0	0	5.74882e-12	0	0	0	8.37333e-11	0	0	0	0	0	0	0	0	0	0	0	0	0	0	0
329.928	31	1	1	0	1	1	2	1	1	2	1	0	0	0	0	0	0	0	0	0	0	0	0	0		1.73894e-12	1.27348e-13	3.76141e-13	0	2.87441e-12	6.42784e-12	3.1837e-11	3.5325e-11	8.37333e-11	3.67924e-10	3.59301e-10	0	0	0	0	0	0	0	0	0	0	0	0	0
331.326	19	9	0	1	0	0	0	0	1	0	1	1	0	0	0	0	0	0	0	0	0	0	0	0		1.0658e-12	1.14613e-12	0	1.30833e-12	0	0	0	0	8.37333e-11	0	3.59301e-10	6.69867e-10	0	0	0	0	0	0	0	0	0	0	0	0
332.724	33	4	3	0	0	1	1	0	0	0	0	0	0	0	0	0	0	0	0	0	0	0	0	0		1.85113e-12	5.09392e-13	1.12842e-12	0	0	6.42784e-12	1.59185e-11	0	0	0	0	0	0	0	0	0	0	0	0	0	0	0	0	0
334.122	33	3	2	0	2	0	1	2	4	1	2	0	0	0	0	0	0	0	0	0	0	0	0	0		1.85113e-12	3.82044e-13	7.52281e-13	0	5.74882e-12	0	1.59185e-11	7.065e-11	3.34933e-10	1.83962e-10	7.18602e-10	0	0	0	0	0	0	0	0	0	0	0	0	0
335.52	17	4	1	1	2	1	0	0	2	1	0	1	1	0	0	0	0	0	0	0	0	0	0	0		9.53611e-13	5.09392e-13	3.76141e-13	1.30833e-12	5.74882e-12	6.42784e-12	0	0	1.67467e-10	1.83962e-10	0	6.69867e-10	1.30833e-09	0	0	0	0	0	0	0	0	0	0	0
336.918	40	4	1	2	0	0	1	0	0	0	0	0	0	0	0	0	0	0	0	0	0	0	0	0		2.24379e-12	5.09392e-13	3.76141e-13	2.61667e-12	0	0	1.59185e-11	0	0	0	0	0	0	0	0	0	0	0	0	0	0	0	0	0
338.316	37	0	1	1	0	0	0	0	0	0	0	0	0	2	1	0	0	0	0	0	0	0	0	0		2.07551e-12	0	3.76141e-13	1.30833e-12	0	0	0	0	0	0	0	0	0	4.5216e-09	3.59007e-09	0	0	0	0	0	0	0	0	0
339.714	30	3	1	0	2	0	0	0	0	0	0	0	0	0	0	0	0	0	0	0	0	0	0	0		1.68284e-12	3.82044e-13	3.76141e-13	0	5.74882e-12	0	0	0	0	0	0	0	0	0	0	0	0	0	0	0	0	0	0	0
341.112	32	5	0	2	2	0	0	0	1	0	0	0	2	0	0	0	0	0	0	0	0	0	0	0		1.79503e-12	6.3674e-13	0	2.61667e-12	5.74882e-12	0	0	0	8.37333e-11	0	0	0	2.61667e-09	0	0	0	0	0	0	0	0	0	0	0
342.51	34	3	0	1	1	0	0	0	0	1	0	0	0	0	0	0	0	0	0	0	0	0	0	0		1.90722e-12	3.82044e-13	0	1.30833e-12	2.87441e-12	0	0	0	0	1.83962e-10	0	0	0	0	0	0	0	0	0	0	0	0	0	0
343.908	34	3	1	0	1	0	1	2	0	0	0	1	0	0	0	0	0	0	0	0	0	0	0	0		1.90722e-12	3.82044e-13	3.76141e-13	0	2.87441e-12	0	1.59185e-11	7.065e-11	0	0	0	6.69867e-10	0	0	0	0	0	0	0	0	0	0	0	0
345.306	26	6	3	0	1	0	1	0	2	0	0	0	0	0	0	0	0	0	0	0	0	0	0	0		1.45846e-12	7.64088e-13	1.12842e-12	0	2.87441e-12	0	1.59185e-11	0	1.67467e-10	0	0	0	0	0	0	0	0	0	0	0	0	0	0	0
346.704	29	4	4	0	1	0	2	1	1	0	0	0	0	0	0	0	0	0	0	0	0	0	0	0		1.62675e-12	5.09392e-13	1.50456e-12	0	2.87441e-12	0	3.1837e-11	3.5325e-11	8.37333e-11	0	0	0	0	0	0	0	0	0	0	0	0	0	0	0
348.102	45	6	3	0	1	4	2	1	2	0	1	0	0	0	0	0	0	0	0	0	0	0	0	0		2.52427e-12	7.64088e-13	1.12842e-12	0	2.87441e-12	2.57114e-11	3.1837e-11	3.5325e-11	1.67467e-10	0	3.59301e-10	0	0	0	0	0	0	0	0	0	0	0	0	0
349.5	25	5	1	1	1	1	0	0	2	0	0	1	1	1	0	0	0	0	0	0	0	0	0	0		1.40237e-12	6.3674e-13	3.76141e-13	1.30833e-12	2.87441e-12	6.42784e-12	0	0	1.67467e-10	0	0	6.69867e-10	1.30833e-09	2.2608e-09	0	0	0	0	0	0	0	0	0	0
350.898	31	6	4	1	2	1	3	1	2	0	0	0	0	0	0	0	0	0	0	0	0	0	0	0		1.73894e-12	7.64088e-13	1.50456e-12	1.30833e-12	5.74882e-12	6.42784e-12	4.77555e-11	3.5325e-11	1.67467e-10	0	0	0	0	0	0	0	0	0	0	0	0	0	0	0
352.296	27	6	0	0	0	0	1	1	0	0	0	1	0	0	0	0	0	0	0	0	0	0	0	0		1.51456e-12	7.64088e-13	0	0	0	0	1.59185e-11	3.5325e-11	0	0	0	6.69867e-10	0	0	0	0	0	0	0	0	0	0	0	0
353.694	35	1	0	0	1	0	1	0	0	1	2	0	0	0	0	0	0	0	0	0	0	0	0	0		1.96332e-12	1.27348e-13	0	0	2.87441e-12	0	1.59185e-11	0	0	1.83962e-10	7.18602e-10	0	0	0	0	0	0	0	0	0	0	0	0	0
355.092	35	5	3	2	1	0	1	0	1	1	0	0	1	0	0	0	0	0	0	0	0	0	0	0		1.96332e-12	6.3674e-13	1.12842e-12	2.61667e-12	2.87441e-12	0	1.59185e-11	0	8.37333e-11	1.83962e-10	0	0	1.30833e-09	0	0	0	0	0	0	0	0	0	0	0
356.49	34	3	1	2	2	1	2	1	4	1	3	1	0	0	0	0	0	0	0	0	0	0	0	0		1.90722e-12	3.82044e-13	3.76141e-13	2.61667e-12	5.74882e-12	6.42784e-12	3.1837e-11	3.5325e-11	3.34933e-10	1.83962e-10	1.0779e-09	6.69867e-10	0	0	0	0	0	0	0	0	0	0	0	0
357.888	24	0	1	0	2	1	2	0	1	0	1	0	0	0	0	0	0	0	0	0	0	0	0	0		1.34627e-12	0	3.76141e-13	0	5.74882e-12	6.42784e-12	3.1837e-11	0	8.37333e-11	0	3.59301e-10	0	0	0	0	0	0	0	0	0	0	0	0	0
359.286	37	5	0	0	0	0	0	0	1	1	1	1	0	0	0	1	0	0	0	0	0	0	0	0		2.07551e-12	6.3674e-13	0	0	0	0	0	0	8.37333e-11	1.83962e-10	3.59301e-10	6.69867e-10	0	0	0	5.35893e-09	0	0	0	0	0	0	0	0
360.684	24	4	2	0	2	0	1	0	2	0	0	0	0	0	0	0	0	0	0	0	0	0	0	0		1.34627e-12	5.09392e-13	7.52281e-13	0	5.74882e-12	0	1.59185e-11	0	1.67467e-10	0	0	0	0	0	0	0	0	0	0	0	0	0	0	0
362.082	32	3	2	1	0	0	1	0	1	0	0	0	0	0	0	0	0	0	0	0	0	0	0	0		1.79503e-12	3.82044e-13	7.52281e-13	1.30833e-12	0	0	1.59185e-11	0	8.37333e-11	0	0	0	0	0	0	0	0	0	0	0	0	0	0	0
363.48	37	5	8	5	0	3	0	0	0	0	0	0	1	0	0	0	0	1	0	0	1	0	0	0		2.07551e-12	6.3674e-13	3.00912e-12	6.54167e-12	0	1.92835e-11	0	0	0	0	0	0	1.30833e-09	0	0	0	0	1.04667e-08	0	0	2.87205e-08	0	0	0
364.878	38	5	1	1	2	1	1	1	0	0	0	0	0	0	0	0	0	0	0	0	0	0	0	0		2.1316e-12	6.3674e-13	3.76141e-13	1.30833e-12	5.74882e-12	6.42784e-12	1.59185e-11	3.5325e-11	0	0	0	0	0	0	0	0	0	0	0	0	0	0	0	0
366.276	37	4	2	0	1	0	1	0	1	0	0	0	0	0	0	0	0	0	0	0	0	0	0	0		2.07551e-12	5.09392e-13	7.52281e-13	0	2.87441e-12	0	1.59185e-11	0	8.37333e-11	0	0	0	0	0	0	0	0	0	0	0	0	0	0	0
367.674	27	5	6	3	1	1	0	0	0	0	0	0	0	0	0	0	0	0	0	0	0	0	0	0		1.51456e-12	6.3674e-13	2.25684e-12	3.925e-12	2.87441e-12	6.42784e-12	0	0	0	0	0	0	0	0	0	0	0	0	0	0	0	0	0	0
369.072	35	2	3	1	0	0	1	1	0	0	0	0	0	0	0	0	0	0	0	0	0	0	0	0		1.96332e-12	2.54696e-13	1.12842e-12	1.30833e-12	0	0	1.59185e-11	3.5325e-11	0	0	0	0	0	0	0	0	0	0	0	0	0	0	0	0
370.47	31	4	2	1	1	0	0	0	1	0	1	0	0	0	0	0	0	0	0	0	0	0	0	0		1.73894e-12	5.09392e-13	7.52281e-13	1.30833e-12	2.87441e-12	0	0	0	8.37333e-11	0	3.59301e-10	0	0	0	0	0	0	0	0	0	0	0	0	0
371.868	16	6	1	1	1	1	0	0	0	3	1	0	0	0	0	0	0	0	0	0	0	0	0	0		8.97517e-13	7.64088e-13	3.76141e-13	1.30833e-12	2.87441e-12	6.42784e-12	0	0	0	5.51886e-10	3.59301e-10	0	0	0	0	0	0	0	0	0	0	0	0	0
373.266	22	2	2	0	0	0	0	0	1	1	0	0	0	0	0	0	0	0	0	0	0	0	0	0		1.23409e-12	2.54696e-13	7.52281e-13	0	0	0	0	0	8.37333e-11	1.83962e-10	0	0	0	0	0	0	0	0	0	0	0	0	0	0
374.664	24	3	2	1	0	0	0	2	0	0	0	0	0	0	1	0	0	0	0	0	0	0	0	0		1.34627e-12	3.82044e-13	7.52281e-13	1.30833e-12	0	0	0	7.065e-11	0	0	0	0	0	0	3.59007e-09	0	0	0	0	0	0	0	0	0
376.062	29	8	2	1	2	0	0	0	0	0	0	0	0	0	0	0	0	0	0	0	0	0	0	0		1.62675e-12	1.01878e-12	7.52281e-13	1.30833e-12	5.74882e-12	0	0	0	0	0	0	0	0	0	0	0	0	0	0	0	0	0	0	0
377.46	37	2	2	0	2	2	0	0	0	0	0	0	0	0	0	0	0	0	0	0	0	0	0	0		2.07551e-12	2.54696e-13	7.52281e-13	0	5.74882e-12	1.28557e-11	0	0	0	0	0	0	0	0	0	0	0	0	0	0	0	0	0	0
378.858	33	3	2	0	0	0	0	0	1	0	0	0	0	0	0	0	0	0	0	0	0	0	0	0		1.85113e-12	3.82044e-13	7.52281e-13	0	0	0	0	0	8.37333e-11	0	0	0	0	0	0	0	0	0	0	0	0	0	0	0
380.256	32	6	2	1	2	2	1	0	0	0	0	0	0	0	0	0	0	0	0	0	0	0	0	0		1.79503e-12	7.64088e-13	7.52281e-13	1.30833e-12	5.74882e-12	1.28557e-11	1.59185e-11	0	0	0	0	0	0	0	0	0	0	0	0	0	0	0	0	0
381.654	30	3	1	3	3	0	0	0	0	0	0	0	0	0	0	0	0	0	0	0	0	0	0	0		1.68284e-12	3.82044e-13	3.76141e-13	3.925e-12	8.62323e-12	0	0	0	0	0	0	0	0	0	0	0	0	0	0	0	0	0	0	0
383.052	36	4	1	0	1	1	0	0	0	0	0	0	0	0	0	0	0	0	0	0	0	0	0	0		2.01941e-12	5.09392e-13	3.76141e-13	0	2.87441e-12	6.42784e-12	0	0	0	0	0	0	0	0	0	0	0	0	0	0	0	0	0	0
384.45	34	0	2	1	0	1	0	0	0	0	0	0	0	0	0	0	0	0	0	0	0	0	0	0		1.90722e-12	0	7.52281e-13	1.30833e-12	0	6.42784e-12	0	0	0	0	0	0	0	0	0	0	0	0	0	0	0	0	0	0
385.848	27	2	4	0	1	1	0	0	1	1	0	0	0	0	0	0	0	0	0	0	0	0	0	0		1.51456e-12	2.54696e-13	1.50456e-12	0	2.87441e-12	6.42784e-12	0	0	8.37333e-11	1.83962e-10	0	0	0	0	0	0	0	0	0	0	0	0	0	0
387.246	35	2	1	0	1	2	0	0	1	0	0	1	0	0	0	0	0	0	0	0	0	0	0	0		1.96332e-12	2.54696e-13	3.76141e-13	0	2.87441e-12	1.28557e-11	0	0	8.37333e-11	0	0	6.69867e-10	0	0	0	0	0	0	0	0	0	0	0	0
388.644	29	3	3	0	1	0	0	0	1	0	1	0	0	0	0	0	0	0	0	0	0	0	0	0		1.62675e-12	3.82044e-13	1.12842e-12	0	2.87441e-12	0	0	0	8.37333e-11	0	3.59301e-10	0	0	0	0	0	0	0	0	0	0	0	0	0
390.042	42	2	2	0	1	0	0	0	0	0	0	0	0	0	0	0	0	0	0	0	0	0	0	0		2.35598e-12	2.54696e-13	7.52281e-13	0	2.87441e-12	0	0	0	0	0	0	0	0	0	0	0	0	0	0	0	0	0	0	0
391.44	33	1	1	0	1	2	2	1	1	0	4	0	0	0	0	0	0	0	0	0	0	0	0	0		1.85113e-12	1.27348e-13	3.76141e-13	0	2.87441e-12	1.28557e-11	3.1837e-11	3.5325e-11	8.37333e-11	0	1.4372e-09	0	0	0	0	0	0	0	0	0	0	0	0	0
392.838	33	4	0	0	0	1	1	0	0	1	0	0	0	0	0	0	0	0	0	0	0	0	0	0		1.85113e-12	5.09392e-13	0	0	0	6.42784e-12	1.59185e-11	0	0	1.83962e-10	0	0	0	0	0	0	0	0	0	0	0	0	0	0
394.236	27	6	0	1	1	1	2	1	0	0	0	0	0	0	0	0	0	0	0	0	0	0	0	0		1.51456e-12	7.64088e-13	0	1.30833e-12	2.87441e-12	6.42784e-12	3.1837e-11	3.5325e-11	0	0	0	0	0	0	0	0	0	0	0	0	0	0	0	0
395.634	35	5	2	2	0	1	0	0	0	0	0	0	0	0	0	0	0	0	0	0	0	0	0	0		1.96332e-12	6.3674e-13	7.52281e-13	2.61667e-12	0	6.42784e-12	0	0	0	0	0	0	0	0	0	0	0	0	0	0	0	0	0	0
397.032	29	5	5	1	0	3	0	2	1	0	1	0	0	0	0	0	0	0	0	0	0	0	0	0		1.62675e-12	6.3674e-13	1.8807e-12	1.30833e-12	0	1.92835e-11	0	7.065e-11	8.37333e-11	0	3.59301e-10	0	0	0	0	0	0	0	0	0	0	0	0	0
398.43	34	4	2	2	1	2	1	0	1	1	0	0	0	0	0	0	0	0	0	0	0	0	0	0		1.90722e-12	5.09392e-13	7.52281e-13	2.61667e-12	2.87441e-12	1.28557e-11	1.59185e-11	0	8.37333e-11	1.83962e-10	0	0	0	0	0	0	0	0	0	0	0	0	0	0
399.828	32	3	3	2	1	0	1	1	2	0	0	0	0	0	0	0	0	0	0	0	0	0	0	0		1.79503e-12	3.82044e-13	1.12842e-12	2.61667e-12	2.87441e-12	0	1.59185e-11	3.5325e-11	1.67467e-10	0	0	0	0	0	0	0	0	0	0	0	0	0	0	0
401.226	21	2	1	1	0	0	0	0	0	0	0	0	0	0	0	0	0	0	0	0	0	0	0	0		1.17799e-12	2.54696e-13	3.76141e-13	1.30833e-12	0	0	0	0	0	0	0	0	0	0	0	0	0	0	0	0	0	0	0	0
402.624	22	4	1	0	1	0	0	0	0	1	0	0	0	0	0	0	0	0	0	0	0	0	0	0		1.23409e-12	5.09392e-13	3.76141e-13	0	2.87441e-12	0	0	0	0	1.83962e-10	0	0	0	0	0	0	0	0	0	0	0	0	0	0
404.022	29	0	1	0	1	1	0	0	0	0	0	0	0	0	0	0	0	0	0	0	0	0	0	0		1.62675e-12	0	3.76141e-13	0	2.87441e-12	6.42784e-12	0	0	0	0	0	0	0	0	0	0	0	0	0	0	0	0	0	0
405.42	29	6	2	0	1	1	0	1	0	0	0	0	0	0	0	0	0	0	0	0	0	0	0	0		1.62675e-12	7.64088e-13	7.52281e-13	0	2.87441e-12	6.42784e-12	0	3.5325e-11	0	0	0	0	0	0	0	0	0	0	0	0	0	0	0	0
406.818	41	7	0	0	1	0	1	0	0	0	0	0	0	0	0	0	0	0	0	0	0	0	0	0		2.29989e-12	8.91436e-13	0	0	2.87441e-12	0	1.59185e-11	0	0	0	0	0	0	0	0	0	0	0	0	0	0	0	0	0
408.216	34	1	2	0	1	0	0	0	0	0	1	0	0	0	0	0	0	0	0	0	0	0	0	0		1.90722e-12	1.27348e-13	7.52281e-13	0	2.87441e-12	0	0	0	0	0	3.59301e-10	0	0	0	0	0	0	0	0	0	0	0	0	0
409.614	27	3	2	0	2	3	0	1	1	0	0	0	0	0	0	0	0	0	0	0	0	0	0	0		1.51456e-12	3.82044e-13	7.52281e-13	0	5.74882e-12	1.92835e-11	0	3.5325e-11	8.37333e-11	0	0	0	0	0	0	0	0	0	0	0	0	0	0	0
411.012	21	8	4	2	2	0	0	1	0	1	0	0	0	0	0	0	0	0	0	0	0	0	0	0		1.17799e-12	1.01878e-12	1.50456e-12	2.61667e-12	5.74882e-12	0	0	3.5325e-11	0	1.83962e-10	0	0	0	0	0	0	0	0	0	0	0	0	0	0
412.41	35	3	2	1	0	1	3	0	2	1	1	0	0	1	0	0	0	0	0	0	0	0	0	0		1.96332e-12	3.82044e-13	7.52281e-13	1.30833e-12	0	6.42784e-12	4.77555e-11	0	1.67467e-10	1.83962e-10	3.59301e-10	0	0	2.2608e-09	0	0	0	0	0	0	0	0	0	0
413.808	36	6	2	0	1	3	2	2	0	2	1	0	0	0	0	0	0	0	0	0	0	0	0	0		2.01941e-12	7.64088e-13	7.52281e-13	0	2.87441e-12	1.92835e-11	3.1837e-11	7.065e-11	0	3.67924e-10	3.59301e-10	0	0	0	0	0	0	0	0	0	0	0	0	0
415.206	27	3	2	1	1	1	0	0	1	0	0	0	0	0	0	0	0	0	0	0	0	0	0	0		1.51456e-12	3.82044e-13	7.52281e-13	1.30833e-12	2.87441e-12	6.42784e-12	0	0	8.37333e-11	0	0	0	0	0	0	0	0	0	0	0	0	0	0	0
416.604	32	7	2	2	1	2	1	1	0	0	0	0	0	1	0	0	0	0	0	0	0	0	0	0		1.79503e-12	8.91436e-13	7.52281e-13	2.61667e-12	2.87441e-12	1.28557e-11	1.59185e-11	3.5325e-11	0	0	0	0	0	2.2608e-09	0	0	0	0	0	0	0	0	0	0
418.002	25	4	2	1	1	2	1	2	1	1	0	2	0	0	0	0	0	0	0	0	0	0	0	0		1.40237e-12	5.09392e-13	7.52281e-13	1.30833e-12	2.87441e-12	1.28557e-11	1.59185e-11	7.065e-11	8.37333e-11	1.83962e-10	0	1.33973e-09	0	0	0	0	0	0	0	0	0	0	0	0
419.4	23	8	0	1	0	1	3	2	3	2	0	3	3	0	1	0	3	0	0	0	0	0	0	0		1.29018e-12	1.01878e-12	0	1.30833e-12	0	6.42784e-12	4.77555e-11	7.065e-11	2.512e-10	3.67924e-10	0	2.0096e-09	3.925e-09	0	3.59007e-09	0	2.28906e-08	0	0	0	0	0	0	0
420.798	31	4	4	1	2	5	3	7	7	5	4	2	3	3	1	0	0	0	0	0	0	0	0	0		1.73894e-12	5.09392e-13	1.50456e-12	1.30833e-12	5.74882e-12	3.21392e-11	4.77555e-11	2.47275e-10	5.86133e-10	9.19811e-10	1.4372e-09	1.33973e-09	3.925e-09	6.7824e-09	3.59007e-09	0	0	0	0	0	0	0	0	0
422.196	31	2	3	1	2	3	2	5	3	0	0	0	0	0	0	0	0	0	0	0	0	0	0	0		1.73894e-12	2.54696e-13	1.12842e-12	1.30833e-12	5.74882e-12	1.92835e-11	3.1837e-11	1.76625e-10	2.512e-10	0	0	0	0	0	0	0	0	0	0	0	0	0	0	0
423.594	39	1	2	3	2	3	2	2	4	5	1	1	0	0	0	0	0	0	0	0	0	0	0	0		2.1877e-12	1.27348e-13	7.52281e-13	3.925e-12	5.74882e-12	1.92835e-11	3.1837e-11	7.065e-11	3.34933e-10	9.19811e-10	3.59301e-10	6.69867e-10	0	0	0	0	0	0	0	0	0	0	0	0
424.992	36	3	4	1	4	5	5	2	2	0	0	0	0	0	0	0	0	0	0	0	0	0	0	0		2.01941e-12	3.82044e-13	1.50456e-12	1.30833e-12	1.14976e-11	3.21392e-11	7.95925e-11	7.065e-11	1.67467e-10	0	0	0	0	0	0	0	0	0	0	0	0	0	0	0
426.39	30	7	2	1	0	1	1	1	2	2	1	0	0	0	0	0	0	0	0	0	0	0	0	0		1.68284e-12	8.91436e-13	7.52281e-13	1.30833e-12	0	6.42784e-12	1.59185e-11	3.5325e-11	1.67467e-10	3.67924e-10	3.59301e-10	0	0	0	0	0	0	0	0	0	0	0	0	0
427.788	27	7	2	0	0	3	1	0	2	0	0	0	1	0	0	0	0	0	0	0	0	0	0	0		1.51456e-12	8.91436e-13	7.52281e-13	0	0	1.92835e-11	1.59185e-11	0	1.67467e-10	0	0	0	1.30833e-09	0	0	0	0	0	0	0	0	0	0	0
429.186	30	4	0	0	0	0	3	1	0	1	0	0	0	0	1	0	0	0	0	0	0	0	0	0		1.68284e-12	5.09392e-13	0	0	0	0	4.77555e-11	3.5325e-11	0	1.83962e-10	0	0	0	0	3.59007e-09	0	0	0	0	0	0	0	0	0
430.584	27	3	1	0	3	0	1	0	3	2	1	0	0	0	0	0	0	0	0	0	0	0	0	0		1.51456e-12	3.82044e-13	3.76141e-13	0	8.62323e-12	0	1.59185e-11	0	2.512e-10	3.67924e-10	3.59301e-10	0	0	0	0	0	0	0	0	0	0	0	0	0
431.982	26	3	0	0	1	1	0	2	5	1	0	0	0	0	0	0	0	0	0	0	0	0	0	0		1.45846e-12	3.82044e-13	0	0	2.87441e-12	6.42784e-12	0	7.065e-11	4.18667e-10	1.83962e-10	0	0	0	0	0	0	0	0	0	0	0	0	0	0
433.38	35	5	5	1	1	2	0	0	1	3	1	0	1	0	0	0	0	0	0	0	0	0	0	0		1.96332e-12	6.3674e-13	1.8807e-12	1.30833e-12	2.87441e-12	1.28557e-11	0	0	8.37333e-11	5.51886e-10	3.59301e-10	0	1.30833e-09	0	0	0	0	0	0	0	0	0	0	0
434.778	24	5	0	0	3	1	1	1	2	0	3	0	0	0	0	0	0	0	0	0	0	0	0	0		1.34627e-12	6.3674e-13	0	0	8.62323e-12	6.42784e-12	1.59185e-11	3.5325e-11	1.67467e-10	0	1.0779e-09	0	0	0	0	0	0	0	0	0	0	0	0	0
436.176	35	6	1	1	0	0	0	2	2	0	1	0	1	0	0	0	0	0	0	0	0	0	0	0		1.96332e-12	7.64088e-13	3.76141e-13	1.30833e-12	0	0	0	7.065e-11	1.67467e-10	0	3.59301e-10	0	1.30833e-09	0	0	0	0	0	0	0	0	0	0	0
437.574	40	2	1	0	1	2	0	0	0	0	0	1	0	0	0	0	0	0	0	0	0	0	0	0		2.24379e-12	2.54696e-13	3.76141e-13	0	2.87441e-12	1.28557e-11	0	0	0	0	0	6.69867e-10	0	0	0	0	0	0	0	0	0	0	0	0
438.972	31	4	0	1	0	2	0	1	3	0	0	0	0	0	0	0	0	0	0	0	0	0	0	0		1.73894e-12	5.09392e-13	0	1.30833e-12	0	1.28557e-11	0	3.5325e-11	2.512e-10	0	0	0	0	0	0	0	0	0	0	0	0	0	0	0
440.37	46	5	5	0	2	1	1	0	1	0	0	0	0	0	0	0	0	0	0	0	0	0	0	0		2.58036e-12	6.3674e-13	1.8807e-12	0	5.74882e-12	6.42784e-12	1.59185e-11	0	8.37333e-11	0	0	0	0	0	0	0	0	0	0	0	0	0	0	0
441.768	42	4	3	0	1	1	0	2	1	0	0	0	0	0	0	0	0	0	0	0	0	0	0	0		2.35598e-12	5.09392e-13	1.12842e-12	0	2.87441e-12	6.42784e-12	0	7.065e-11	8.37333e-11	0	0	0	0	0	0	0	0	0	0	0	0	0	0	0
443.166	24	4	3	1	1	0	1	2	0	0	0	0	1	0	0	0	0	0	0	0	0	0	0	0		1.34627e-12	5.09392e-13	1.12842e-12	1.30833e-12	2.87441e-12	0	1.59185e-11	7.065e-11	0	0	0	0	1.30833e-09	0	0	0	0	0	0	0	0	0	0	0
444.564	39	10	6	1	5	6	7	2	4	4	2	0	0	0	0	0	0	0	0	0	0	0	0	0		2.1877e-12	1.27348e-12	2.25684e-12	1.30833e-12	1.4372e-11	3.8567e-11	1.11429e-10	7.065e-11	3.34933e-10	7.35849e-10	7.18602e-10	0	0	0	0	0	0	0	0	0	0	0	0	0
445.962	44	12	6	2	7	8	9	4	5	1	3	0	1	0	0	0	0	0	0	0	0	0	0	0		2.46817e-12	1.52818e-12	2.25684e-12	2.61667e-12	2.01209e-11	5.14227e-11	1.43266e-10	1.413e-10	4.18667e-10	1.83962e-10	1.0779e-09	0	1.30833e-09	0	0	0	0	0	0	0	0	0	0	0
447.36	43	22	10	0	2	10	5	1	7	3	1	0	0	0	0	1	0	0	0	0	0	0	0	0		2.41208e-12	2.80165e-12	3.76141e-12	0	5.74882e-12	6.42784e-11	7.95925e-11	3.5325e-11	5.86133e-10	5.51886e-10	3.59301e-10	0	0	0	0	5.35893e-09	0	0	0	0	0	0	0	0
448.758	44	10	6	2	3	5	6	2	1	5	0	1	0	0	0	0	0	0	0	0	0	0	0	0		2.46817e-12	1.27348e-12	2.25684e-12	2.61667e-12	8.62323e-12	3.21392e-11	9.55109e-11	7.065e-11	8.37333e-11	9.19811e-10	0	6.69867e-10	0	0	0	0	0	0	0	0	0	0	0	0
450.156	51	17	21	5	14	18	12	6	2	2	2	4	0	0	0	0	0	0	0	0	0	0	0	0		2.86083e-12	2.16491e-12	7.89895e-12	6.54167e-12	4.02417e-11	1.15701e-10	1.91022e-10	2.1195e-10	1.67467e-10	3.67924e-10	7.18602e-10	2.67947e-09	0	0	0	0	0	0	0	0	0	0	0	0
451.554	51	18	19	4	19	12	8	8	5	3	0	0	0	0	0	0	0	0	0	0	0	0	0	0		2.86083e-12	2.29226e-12	7.14667e-12	5.23333e-12	5.46138e-11	7.71341e-11	1.27348e-10	2.826e-10	4.18667e-10	5.51886e-10	0	0	0	0	0	0	0	0	0	0	0	0	0	0
452.952	16	4	1	1	3	1	2	2	1	0	0	1	0	0	1	0	0	0	0	0	0	0	0	0		8.97517e-13	5.09392e-13	3.76141e-13	1.30833e-12	8.62323e-12	6.42784e-12	3.1837e-11	7.065e-11	8.37333e-11	0	0	6.69867e-10	0	0	3.59007e-09	0	0	0	0	0	0	0	0	0
454.35	3	1	0	0	0	1	0	0	0	0	1	0	0	0	0	0	0	0	0	0	0	0	0	0		1.68284e-13	1.27348e-13	0	0	0	6.42784e-12	0	0	0	0	3.59301e-10	0	0	0	0	0	0	0	0	0	0	0	0	0
455.748	4	0	1	0	1	0	0	0	0	0	0	0	0	0	0	0	0	0	0	0	0	0	0	0		2.24379e-13	0	3.76141e-13	0	2.87441e-12	0	0	0	0	0	0	0	0	0	0	0	0	0	0	0	0	0	0	0
457.146	2	0	0	0	0	0	0	0	0	0	0	0	0	0	0	0	0	0	0	0	0	0	0	0		1.1219e-13	0	0	0	0	0	0	0	0	0	0	0	0	0	0	0	0	0	0	0	0	0	0	0
458.544	2	0	1	0	0	0	0	0	0	0	0	0	0	0	0	0	0	0	0	0	0	0	0	0		1.1219e-13	0	3.76141e-13	0	0	0	0	0	0	0	0	0	0	0	0	0	0	0	0	0	0	0	0	0
459.942	2	0	0	0	0	0	0	0	0	0	0	0	0	0	0	0	0	0	0	0	0	0	0	0		1.1219e-13	0	0	0	0	0	0	0	0	0	0	0	0	0	0	0	0	0	0	0	0	0	0	0
461.34	1	0	0	0	0	0	0	0	1	0	0	0	0	0	0	0	0	0	0	0	0	0	0	0		5.60948e-14	0	0	0	0	0	0	0	8.37333e-11	0	0	0	0	0	0	0	0	0	0	0	0	0	0	0
462.738	3	1	1	0	0	0	0	0	0	0	0	0	0	0	0	0	0	0	0	0	0	0	0	0		1.68284e-13	1.27348e-13	3.76141e-13	0	0	0	0	0	0	0	0	0	0	0	0	0	0	0	0	0	0	0	0	0
464.136	1	0	0	0	0	0	0	0	0	0	0	0	0	0	0	0	0	0	0	0	0	0	0	0		5.60948e-14	0	0	0	0	0	0	0	0	0	0	0	0	0	0	0	0	0	0	0	0	0	0	0
465.534	1	0	0	0	0	0	0	0	0	0	0	0	0	0	0	0	0	0	0	0	0	0	0	0		5.60948e-14	0	0	0	0	0	0	0	0	0	0	0	0	0	0	0	0	0	0	0	0	0	0	0
466.932	2	0	0	0	0	0	0	0	0	0	0	0	0	0	0	0	0	0	0	0	0	0	0	0		1.1219e-13	0	0	0	0	0	0	0	0	0	0	0	0	0	0	0	0	0	0	0	0	0	0	0
468.33	3	0	0	1	1	0	1	0	0	0	1	0	0	0	0	0	0	0	0	0	0	0	0	0		1.68284e-13	0	0	1.30833e-12	2.87441e-12	0	1.59185e-11	0	0	0	3.59301e-10	0	0	0	0	0	0	0	0	0	0	0	0	0
469.728	2	0	0	0	0	0	0	0	0	0	0	0	0	0	0	0	0	0	0	0	0	0	0	0		1.1219e-13	0	0	0	0	0	0	0	0	0	0	0	0	0	0	0	0	0	0	0	0	0	0	0
471.126	4	0	0	0	0	0	0	0	0	0	0	0	0	0	0	0	0	0	0	0	0	0	0	0		2.24379e-13	0	0	0	0	0	0	0	0	0	0	0	0	0	0	0	0	0	0	0	0	0	0	0
472.524	1	0	0	0	0	0	0	0	0	0	0	0	0	0	0	0	0	0	0	0	0	0	0	0		5.60948e-14	0	0	0	0	0	0	0	0	0	0	0	0	0	0	0	0	0	0	0	0	0	0	0
473.922	1	0	0	0	0	0	0	0	0	0	0	0	0	0	0	0	0	0	0	0	0	0	0	0		5.60948e-14	0	0	0	0	0	0	0	0	0	0	0	0	0	0	0	0	0	0	0	0	0	0	0
475.32	2	0	0	0	0	0	0	0	0	0	0	0	0	0	0	0	0	0	0	0	0	0	0	0		1.1219e-13	0	0	0	0	0	0	0	0	0	0	0	0	0	0	0	0	0	0	0	0	0	0	0
476.718	4	0	0	0	0	0	0	0	0	0	0	0	0	0	0	0	0	0	0	0	0	0	0	0		2.24379e-13	0	0	0	0	0	0	0	0	0	0	0	0	0	0	0	0	0	0	0	0	0	0	0
478.116	5	0	0	0	0	0	0	0	0	0	0	0	0	0	0	0	0	0	0	0	0	0	0	0		2.80474e-13	0	0	0	0	0	0	0	0	0	0	0	0	0	0	0	0	0	0	0	0	0	0	0
479.514	1	0	0	0	0	0	0	0	0	0	0	0	0	0	0	0	0	0	0	0	0	0	0	0		5.60948e-14	0	0	0	0	0	0	0	0	0	0	0	0	0	0	0	0	0	0	0	0	0	0	0
480.912	2	0	0	0	0	0	0	0	0	0	0	0	0	0	0	0	0	0	0	0	0	0	0	0		1.1219e-13	0	0	0	0	0	0	0	0	0	0	0	0	0	0	0	0	0	0	0	0	0	0	0
482.31	38	14	8	3	7	6	7	1	2	3	0	1	0	0	0	0	0	0	0	0	0	0	0	0		2.1316e-12	1.78287e-12	3.00912e-12	3.925e-12	2.01209e-11	3.8567e-11	1.11429e-10	3.5325e-11	1.67467e-10	5.51886e-10	0	6.69867e-10	0	0	0	0	0	0	0	0	0	0	0	0
483.708	28	11	10	1	7	6	4	1	1	0	0	0	0	0	0	0	0	0	0	0	0	0	0	0		1.57065e-12	1.40083e-12	3.76141e-12	1.30833e-12	2.01209e-11	3.8567e-11	6.3674e-11	3.5325e-11	8.37333e-11	0	0	0	0	0	0	0	0	0	0	0	0	0	0	0
485.106	43	13	6	1	6	8	5	1	2	0	0	0	0	0	0	0	0	0	0	0	0	0	0	0		2.41208e-12	1.65552e-12	2.25684e-12	1.30833e-12	1.72465e-11	5.14227e-11	7.95925e-11	3.5325e-11	1.67467e-10	0	0	0	0	0	0	0	0	0	0	0	0	0	0	0
486.504	23	4	7	1	2	1	1	0	0	0	0	0	0	0	0	0	0	0	0	0	0	0	0	0		1.29018e-12	5.09392e-13	2.63298e-12	1.30833e-12	5.74882e-12	6.42784e-12	1.59185e-11	0	0	0	0	0	0	0	0	0	0	0	0	0	0	0	0	0
487.902	19	1	3	0	1	1	0	0	0	0	0	0	0	0	0	0	0	0	0	0	0	0	0	0		1.0658e-12	1.27348e-13	1.12842e-12	0	2.87441e-12	6.42784e-12	0	0	0	0	0	0	0	0	0	0	0	0	0	0	0	0	0	0
489.3	8	0	1	0	0	0	0	1	0	0	0	0	0	0	0	0	0	0	0	0	0	0	0	0		4.48758e-13	0	3.76141e-13	0	0	0	0	3.5325e-11	0	0	0	0	0	0	0	0	0	0	0	0	0	0	0	0
490.698	6	2	0	1	0	0	0	0	0	0	0	0	0	0	0	0	0	0	0	0	0	0	0	0		3.36569e-13	2.54696e-13	0	1.30833e-12	0	0	0	0	0	0	0	0	0	0	0	0	0	0	0	0	0	0	0	0
492.096	10	3	0	0	0	0	0	0	0	0	0	0	0	0	0	0	0	0	0	0	0	0	0	0		5.60948e-13	3.82044e-13	0	0	0	0	0	0	0	0	0	0	0	0	0	0	0	0	0	0	0	0	0	0
493.494	7	1	0	1	1	0	1	0	0	0	0	0	0	0	0	0	0	0	0	0	0	0	0	0		3.92664e-13	1.27348e-13	0	1.30833e-12	2.87441e-12	0	1.59185e-11	0	0	0	0	0	0	0	0	0	0	0	0	0	0	0	0	0
494.892	8	1	0	0	0	0	0	0	0	0	0	0	0	0	0	0	0	0	0	0	0	0	0	0		4.48758e-13	1.27348e-13	0	0	0	0	0	0	0	0	0	0	0	0	0	0	0	0	0	0	0	0	0	0
496.29	12	4	3	1	0	0	0	0	0	0	0	0	0	0	0	0	0	0	0	0	0	0	0	0		6.73137e-13	5.09392e-13	1.12842e-12	1.30833e-12	0	0	0	0	0	0	0	0	0	0	0	0	0	0	0	0	0	0	0	0
497.688	20	10	5	1	1	1	2	0	0	0	0	0	0	0	0	0	0	0	0	0	0	0	0	0		1.1219e-12	1.27348e-12	1.8807e-12	1.30833e-12	2.87441e-12	6.42784e-12	3.1837e-11	0	0	0	0	0	0	0	0	0	0	0	0	0	0	0	0	0
499.086	21	5	7	3	1	1	2	2	2	0	0	1	1	0	0	0	0	0	0	0	0	0	0	0		1.17799e-12	6.3674e-13	2.63298e-12	3.925e-12	2.87441e-12	6.42784e-12	3.1837e-11	7.065e-11	1.67467e-10	0	0	6.69867e-10	1.30833e-09	0	0	0	0	0	0	0	0	0	0	0
500.484	32	9	1	3	2	2	0	0	0	0	0	0	0	0	0	0	0	0	0	0	0	0	0	0		1.79503e-12	1.14613e-12	3.76141e-13	3.925e-12	5.74882e-12	1.28557e-11	0	0	0	0	0	0	0	0	0	0	0	0	0	0	0	0	0	0
501.882	25	3	2	0	1	0	0	0	0	0	0	0	0	0	0	0	0	0	0	0	0	0	0	0		1.40237e-12	3.82044e-13	7.52281e-13	0	2.87441e-12	0	0	0	0	0	0	0	0	0	0	0	0	0	0	0	0	0	0	0

## Sheet: OPC - 23-07-2024 - Etna
Analysis time [s]	Counts per seconds [bins equivalent in µm]																									Raw data conversion into mass based on particle density of 2800 kg m-3 and spherical assumption [g]
	Bin0	Bin1	Bin2	Bin3	Bin4	Bin5	Bin6	Bin7	Bin8	Bin9	Bin10	Bin11	Bin12	Bin13	Bin14	Bin15	Bin16	Bin17	Bin18	Bin19	Bin20	Bin21	Bin22	Bin23		Bin0	Bin1	Bin2	Bin3	Bin4	Bin5	Bin6	Bin7	Bin8	Bin9	Bin10	Bin11	Bin12	Bin13	Bin14	Bin15	Bin16	Bin17	Bin18	Bin19	Bin20	Bin21	Bin22	Bin23
	0,35 - 0,46	0,46 - 0,66	0,66 - 1,00	1,00 - 1,30	1,30 - 1,70	1,70 - 2,30	2,30 - 3,00	3,00 - 4,00	4,00 - 5,20	5,20 - 6,50	6,50 - 8,00	8,00 - 10,00	10,00 - 12,00	12,00 - 14,00	14,00 - 16,00	16,00 - 18,00	18,00 - 20,00	20,00 - 22,00	22,00 - 25,00	25,00 - 28,00	28,00 - 31,00	31,00 - 34,00	34,00 - 37,00	37,00 - 40,00		0.35	0.46	0.66	1	1.3	1.7	2.3	3	4	5.2	6.5	8	10	12	14	16	18	20	22	25	28	31	34	37
0	20	1	1	0	0	0	0	0	0	0	0	0	0	0	0	0	0	0	0	0	0	0	0	0		1.25652e-12	1.4263e-13	4.21277e-13	0	0	0	0	0	0	0	0	0	0	0	0	0	0	0	0	0	0	0	0	0
1.398	31	0	1	1	1	0	0	0	0	0	0	0	0	0	0	0	0	0	0	0	0	0	0	0		1.94761e-12	0	4.21277e-13	1.46533e-12	3.21934e-12	0	0	0	0	0	0	0	0	0	0	0	0	0	0	0	0	0	0	0
2.796	30	6	1	1	1	0	0	0	0	0	0	0	0	0	0	0	0	0	0	0	0	0	0	0		1.88478e-12	8.55778e-13	4.21277e-13	1.46533e-12	3.21934e-12	0	0	0	0	0	0	0	0	0	0	0	0	0	0	0	0	0	0	0
4.194	27	1	0	0	0	0	0	0	0	0	0	0	0	0	0	0	0	0	0	0	0	0	0	0		1.69631e-12	1.4263e-13	0	0	0	0	0	0	0	0	0	0	0	0	0	0	0	0	0	0	0	0	0	0
5.592	21	2	2	0	0	0	0	0	0	0	0	0	0	0	0	0	0	0	0	0	0	0	0	0		1.31935e-12	2.85259e-13	8.42555e-13	0	0	0	0	0	0	0	0	0	0	0	0	0	0	0	0	0	0	0	0	0
6.99	32	0	2	0	0	0	0	0	0	0	0	0	0	0	0	0	0	0	0	0	0	0	0	0		2.01044e-12	0	8.42555e-13	0	0	0	0	0	0	0	0	0	0	0	0	0	0	0	0	0	0	0	0	0
8.388	19	2	0	1	2	0	0	0	0	0	0	0	0	0	0	0	0	0	0	0	0	0	0	0		1.1937e-12	2.85259e-13	0	1.46533e-12	6.43867e-12	0	0	0	0	0	0	0	0	0	0	0	0	0	0	0	0	0	0	0
9.786	44	2	1	1	0	1	0	0	0	0	0	0	0	0	0	0	0	0	0	0	0	0	0	0		2.76435e-12	2.85259e-13	4.21277e-13	1.46533e-12	0	7.19918e-12	0	0	0	0	0	0	0	0	0	0	0	0	0	0	0	0	0	0
11.184	21	3	2	1	0	0	0	0	1	0	0	0	0	0	0	0	0	0	0	0	0	0	0	0		1.31935e-12	4.27889e-13	8.42555e-13	1.46533e-12	0	0	0	0	9.37813e-11	0	0	0	0	0	0	0	0	0	0	0	0	0	0	0
12.582	30	6	2	0	1	1	0	0	0	0	0	0	0	0	0	0	0	0	0	0	0	0	0	0		1.88478e-12	8.55778e-13	8.42555e-13	0	3.21934e-12	7.19918e-12	0	0	0	0	0	0	0	0	0	0	0	0	0	0	0	0	0	0
13.98	33	5	1	0	0	0	0	0	1	0	0	0	0	0	0	0	0	0	0	0	0	0	0	0		2.07326e-12	7.13148e-13	4.21277e-13	0	0	0	0	0	9.37813e-11	0	0	0	0	0	0	0	0	0	0	0	0	0	0	0
15.378	22	4	0	0	1	1	0	0	0	0	0	0	0	0	0	0	0	0	0	0	0	0	0	0		1.38218e-12	5.70519e-13	0	0	3.21934e-12	7.19918e-12	0	0	0	0	0	0	0	0	0	0	0	0	0	0	0	0	0	0
16.776	32	0	1	0	1	0	1	1	0	0	0	0	0	0	0	0	0	0	0	0	0	0	0	0		2.01044e-12	0	4.21277e-13	0	3.21934e-12	0	1.78287e-11	3.9564e-11	0	0	0	0	0	0	0	0	0	0	0	0	0	0	0	0
18.174	31	1	0	0	1	1	1	0	1	0	0	0	0	0	0	0	0	0	0	0	0	0	0	0		1.94761e-12	1.4263e-13	0	0	3.21934e-12	7.19918e-12	1.78287e-11	0	9.37813e-11	0	0	0	0	0	0	0	0	0	0	0	0	0	0	0
19.572	25	1	1	0	0	0	0	0	0	0	0	0	0	0	0	0	0	0	0	0	0	0	0	0		1.57065e-12	1.4263e-13	4.21277e-13	0	0	0	0	0	0	0	0	0	0	0	0	0	0	0	0	0	0	0	0	0
20.97	29	0	0	1	2	0	0	0	0	0	0	0	0	0	0	0	0	0	0	0	0	0	0	0		1.82196e-12	0	0	1.46533e-12	6.43867e-12	0	0	0	0	0	0	0	0	0	0	0	0	0	0	0	0	0	0	0
22.368	24	3	0	0	1	1	0	0	0	0	0	0	0	0	0	0	0	0	0	0	0	0	0	0		1.50783e-12	4.27889e-13	0	0	3.21934e-12	7.19918e-12	0	0	0	0	0	0	0	0	0	0	0	0	0	0	0	0	0	0
23.766	38	0	0	1	1	0	0	0	0	0	0	0	0	0	0	0	0	0	0	0	0	0	0	0		2.38739e-12	0	0	1.46533e-12	3.21934e-12	0	0	0	0	0	0	0	0	0	0	0	0	0	0	0	0	0	0	0
25.164	35	0	1	1	0	0	1	0	1	0	0	0	0	0	0	0	0	0	0	0	0	0	0	0		2.19892e-12	0	4.21277e-13	1.46533e-12	0	0	1.78287e-11	0	9.37813e-11	0	0	0	0	0	0	0	0	0	0	0	0	0	0	0
26.562	41	2	2	0	1	0	2	0	0	0	0	0	0	0	0	0	0	0	0	0	0	0	0	0		2.57587e-12	2.85259e-13	8.42555e-13	0	3.21934e-12	0	3.56574e-11	0	0	0	0	0	0	0	0	0	0	0	0	0	0	0	0	0
27.96	28	4	5	1	3	1	0	1	0	0	0	0	0	0	0	0	0	0	0	0	0	0	0	0		1.75913e-12	5.70519e-13	2.10639e-12	1.46533e-12	9.65801e-12	7.19918e-12	0	3.9564e-11	0	0	0	0	0	0	0	0	0	0	0	0	0	0	0	0
29.358	39	4	2	1	0	0	0	0	0	0	0	0	0	0	0	0	0	0	0	0	0	0	0	0		2.45022e-12	5.70519e-13	8.42555e-13	1.46533e-12	0	0	0	0	0	0	0	0	0	0	0	0	0	0	0	0	0	0	0	0
30.756	42	2	3	0	1	0	1	0	0	0	0	0	0	0	0	0	0	0	0	0	0	0	0	0		2.6387e-12	2.85259e-13	1.26383e-12	0	3.21934e-12	0	1.78287e-11	0	0	0	0	0	0	0	0	0	0	0	0	0	0	0	0	0
32.154	31	2	2	2	0	3	0	0	0	0	0	0	0	0	0	0	0	0	0	0	0	0	0	0		1.94761e-12	2.85259e-13	8.42555e-13	2.93067e-12	0	2.15975e-11	0	0	0	0	0	0	0	0	0	0	0	0	0	0	0	0	0	0
33.552	28	2	4	0	2	1	1	0	1	0	0	0	0	0	0	0	0	0	0	0	0	0	0	0		1.75913e-12	2.85259e-13	1.68511e-12	0	6.43867e-12	7.19918e-12	1.78287e-11	0	9.37813e-11	0	0	0	0	0	0	0	0	0	0	0	0	0	0	0
34.95	31	2	6	0	0	1	1	0	0	0	0	0	0	0	0	0	0	0	0	0	0	0	0	0		1.94761e-12	2.85259e-13	2.52766e-12	0	0	7.19918e-12	1.78287e-11	0	0	0	0	0	0	0	0	0	0	0	0	0	0	0	0	0
36.348	27	8	2	1	1	0	2	0	0	0	0	0	0	0	0	0	0	0	0	0	0	0	0	0		1.69631e-12	1.14104e-12	8.42555e-13	1.46533e-12	3.21934e-12	0	3.56574e-11	0	0	0	0	0	0	0	0	0	0	0	0	0	0	0	0	0
37.746	29	7	6	0	3	3	1	1	0	0	0	1	0	0	0	0	0	0	0	0	0	0	0	0		1.82196e-12	9.98408e-13	2.52766e-12	0	9.65801e-12	2.15975e-11	1.78287e-11	3.9564e-11	0	0	0	7.50251e-10	0	0	0	0	0	0	0	0	0	0	0	0
39.144	24	3	5	2	2	1	4	1	0	0	0	0	0	0	0	0	0	0	0	0	0	0	0	0		1.50783e-12	4.27889e-13	2.10639e-12	2.93067e-12	6.43867e-12	7.19918e-12	7.13148e-11	3.9564e-11	0	0	0	0	0	0	0	0	0	0	0	0	0	0	0	0
40.542	24	5	4	1	2	0	0	2	0	0	0	0	0	0	0	0	0	0	0	0	0	0	0	0		1.50783e-12	7.13148e-13	1.68511e-12	1.46533e-12	6.43867e-12	0	0	7.9128e-11	0	0	0	0	0	0	0	0	0	0	0	0	0	0	0	0
41.94	42	7	6	1	4	2	1	2	1	0	0	0	0	0	0	0	0	0	0	0	0	0	0	0		2.6387e-12	9.98408e-13	2.52766e-12	1.46533e-12	1.28773e-11	1.43984e-11	1.78287e-11	7.9128e-11	9.37813e-11	0	0	0	0	0	0	0	0	0	0	0	0	0	0	0
43.338	24	6	3	1	5	0	3	0	0	0	0	0	0	0	0	0	0	0	0	0	0	0	0	0		1.50783e-12	8.55778e-13	1.26383e-12	1.46533e-12	1.60967e-11	0	5.34861e-11	0	0	0	0	0	0	0	0	0	0	0	0	0	0	0	0	0
44.736	14	2	0	0	0	0	0	0	0	0	0	0	0	0	0	0	0	0	0	0	0	0	0	0		8.79566e-13	2.85259e-13	0	0	0	0	0	0	0	0	0	0	0	0	0	0	0	0	0	0	0	0	0	0
46.134	21	3	2	1	1	2	0	0	0	0	0	0	0	0	0	0	0	0	0	0	0	0	0	0		1.31935e-12	4.27889e-13	8.42555e-13	1.46533e-12	3.21934e-12	1.43984e-11	0	0	0	0	0	0	0	0	0	0	0	0	0	0	0	0	0	0
47.532	20	3	2	0	1	0	0	0	0	0	0	0	0	0	0	0	0	0	0	0	0	0	0	0		1.25652e-12	4.27889e-13	8.42555e-13	0	3.21934e-12	0	0	0	0	0	0	0	0	0	0	0	0	0	0	0	0	0	0	0
48.93	26	2	0	0	2	1	0	1	0	0	0	0	0	0	0	0	0	0	0	0	0	0	0	0		1.63348e-12	2.85259e-13	0	0	6.43867e-12	7.19918e-12	0	3.9564e-11	0	0	0	0	0	0	0	0	0	0	0	0	0	0	0	0
50.328	22	1	0	0	0	1	2	0	0	0	0	0	0	0	0	0	0	0	0	0	0	0	0	0		1.38218e-12	1.4263e-13	0	0	0	7.19918e-12	3.56574e-11	0	0	0	0	0	0	0	0	0	0	0	0	0	0	0	0	0
51.726	23	0	1	0	2	2	0	0	0	0	0	0	0	0	0	0	0	0	0	0	0	0	0	0		1.445e-12	0	4.21277e-13	0	6.43867e-12	1.43984e-11	0	0	0	0	0	0	0	0	0	0	0	0	0	0	0	0	0	0
53.124	23	1	1	1	0	0	0	0	0	0	0	0	0	0	0	0	0	0	0	0	0	0	0	0		1.445e-12	1.4263e-13	4.21277e-13	1.46533e-12	0	0	0	0	0	0	0	0	0	0	0	0	0	0	0	0	0	0	0	0
54.522	26	2	4	1	1	0	2	1	0	0	0	0	0	0	0	0	0	0	0	0	0	0	0	0		1.63348e-12	2.85259e-13	1.68511e-12	1.46533e-12	3.21934e-12	0	3.56574e-11	3.9564e-11	0	0	0	0	0	0	0	0	0	0	0	0	0	0	0	0
55.92	33	0	1	1	0	0	0	0	1	0	0	0	0	0	0	0	0	0	0	0	0	0	0	0		2.07326e-12	0	4.21277e-13	1.46533e-12	0	0	0	0	9.37813e-11	0	0	0	0	0	0	0	0	0	0	0	0	0	0	0
57.318	22	4	1	0	1	2	1	0	0	0	0	0	0	0	0	0	0	0	0	0	0	0	0	0		1.38218e-12	5.70519e-13	4.21277e-13	0	3.21934e-12	1.43984e-11	1.78287e-11	0	0	0	0	0	0	0	0	0	0	0	0	0	0	0	0	0
58.716	24	0	3	0	1	0	0	0	0	0	0	0	0	0	0	0	0	0	0	0	0	0	0	0		1.50783e-12	0	1.26383e-12	0	3.21934e-12	0	0	0	0	0	0	0	0	0	0	0	0	0	0	0	0	0	0	0
60.114	28	3	0	0	1	1	0	0	0	0	0	0	0	0	0	0	0	0	0	0	0	0	0	0		1.75913e-12	4.27889e-13	0	0	3.21934e-12	7.19918e-12	0	0	0	0	0	0	0	0	0	0	0	0	0	0	0	0	0	0
61.512	26	2	1	1	2	0	0	0	0	0	0	0	0	0	0	0	0	0	0	0	0	0	0	0		1.63348e-12	2.85259e-13	4.21277e-13	1.46533e-12	6.43867e-12	0	0	0	0	0	0	0	0	0	0	0	0	0	0	0	0	0	0	0
62.91	17	1	4	1	1	0	0	0	0	0	0	0	0	0	0	0	0	0	0	0	0	0	0	0		1.06804e-12	1.4263e-13	1.68511e-12	1.46533e-12	3.21934e-12	0	0	0	0	0	0	0	0	0	0	0	0	0	0	0	0	0	0	0
64.308	25	4	0	0	0	2	1	1	0	0	0	0	0	0	0	0	0	0	0	0	0	0	0	0		1.57065e-12	5.70519e-13	0	0	0	1.43984e-11	1.78287e-11	3.9564e-11	0	0	0	0	0	0	0	0	0	0	0	0	0	0	0	0
65.706	31	2	0	0	1	1	0	0	0	0	0	0	0	0	0	0	0	0	0	0	0	0	0	0		1.94761e-12	2.85259e-13	0	0	3.21934e-12	7.19918e-12	0	0	0	0	0	0	0	0	0	0	0	0	0	0	0	0	0	0
67.104	29	4	2	0	0	0	0	0	0	1	0	0	0	0	0	0	0	0	0	0	0	0	0	0		1.82196e-12	5.70519e-13	8.42555e-13	0	0	0	0	0	0	2.06038e-10	0	0	0	0	0	0	0	0	0	0	0	0	0	0
68.502	27	4	0	0	0	0	0	1	0	0	0	0	0	0	0	0	0	0	0	0	0	0	0	0		1.69631e-12	5.70519e-13	0	0	0	0	0	3.9564e-11	0	0	0	0	0	0	0	0	0	0	0	0	0	0	0	0
69.9	28	2	1	1	0	1	0	0	0	0	0	0	0	0	0	0	0	0	0	0	0	0	0	0		1.75913e-12	2.85259e-13	4.21277e-13	1.46533e-12	0	7.19918e-12	0	0	0	0	0	0	0	0	0	0	0	0	0	0	0	0	0	0
71.298	27	3	3	0	0	1	0	0	0	0	0	0	0	0	0	0	0	0	0	0	0	0	0	0		1.69631e-12	4.27889e-13	1.26383e-12	0	0	7.19918e-12	0	0	0	0	0	0	0	0	0	0	0	0	0	0	0	0	0	0
72.696	31	3	0	0	0	1	1	0	0	0	0	0	0	0	0	0	0	0	0	0	0	0	0	0		1.94761e-12	4.27889e-13	0	0	0	7.19918e-12	1.78287e-11	0	0	0	0	0	0	0	0	0	0	0	0	0	0	0	0	0
74.094	26	2	0	0	0	0	1	0	0	0	0	0	0	0	0	0	0	0	0	0	0	0	0	0		1.63348e-12	2.85259e-13	0	0	0	0	1.78287e-11	0	0	0	0	0	0	0	0	0	0	0	0	0	0	0	0	0
75.492	27	3	1	0	2	0	0	0	0	0	0	0	0	0	0	0	0	0	0	0	0	0	0	0		1.69631e-12	4.27889e-13	4.21277e-13	0	6.43867e-12	0	0	0	0	0	0	0	0	0	0	0	0	0	0	0	0	0	0	0
76.89	28	2	1	0	1	0	1	0	0	0	0	0	0	0	0	0	0	0	0	0	0	0	0	0		1.75913e-12	2.85259e-13	4.21277e-13	0	3.21934e-12	0	1.78287e-11	0	0	0	0	0	0	0	0	0	0	0	0	0	0	0	0	0
78.288	24	2	1	0	1	0	0	0	0	0	0	0	0	0	0	0	0	0	0	0	0	0	0	0		1.50783e-12	2.85259e-13	4.21277e-13	0	3.21934e-12	0	0	0	0	0	0	0	0	0	0	0	0	0	0	0	0	0	0	0
79.686	31	1	0	0	0	0	0	0	0	0	0	0	0	0	0	0	0	0	0	0	0	0	0	0		1.94761e-12	1.4263e-13	0	0	0	0	0	0	0	0	0	0	0	0	0	0	0	0	0	0	0	0	0	0
81.084	18	4	0	0	0	0	0	0	0	0	0	0	0	0	0	0	0	0	0	0	0	0	0	0		1.13087e-12	5.70519e-13	0	0	0	0	0	0	0	0	0	0	0	0	0	0	0	0	0	0	0	0	0	0
82.482	27	1	0	0	2	0	0	0	1	1	0	0	0	0	0	0	0	0	0	0	0	0	0	0		1.69631e-12	1.4263e-13	0	0	6.43867e-12	0	0	0	9.37813e-11	2.06038e-10	0	0	0	0	0	0	0	0	0	0	0	0	0	0
83.88	24	1	1	0	0	0	0	0	0	0	0	0	0	0	0	0	0	0	0	0	0	0	0	0		1.50783e-12	1.4263e-13	4.21277e-13	0	0	0	0	0	0	0	0	0	0	0	0	0	0	0	0	0	0	0	0	0
85.278	20	2	2	0	2	0	0	0	0	0	0	0	0	0	0	0	0	0	0	0	0	0	0	0		1.25652e-12	2.85259e-13	8.42555e-13	0	6.43867e-12	0	0	0	0	0	0	0	0	0	0	0	0	0	0	0	0	0	0	0
86.676	39	6	2	0	1	1	0	0	2	0	0	0	0	0	0	0	0	0	0	0	0	0	0	0		2.45022e-12	8.55778e-13	8.42555e-13	0	3.21934e-12	7.19918e-12	0	0	1.87563e-10	0	0	0	0	0	0	0	0	0	0	0	0	0	0	0
88.074	36	3	3	0	3	0	0	0	1	0	0	0	0	0	0	0	0	0	0	0	0	0	0	0		2.26174e-12	4.27889e-13	1.26383e-12	0	9.65801e-12	0	0	0	9.37813e-11	0	0	0	0	0	0	0	0	0	0	0	0	0	0	0
89.472	27	4	3	0	2	0	1	0	0	0	0	0	0	0	0	0	0	0	0	0	0	0	0	0		1.69631e-12	5.70519e-13	1.26383e-12	0	6.43867e-12	0	1.78287e-11	0	0	0	0	0	0	0	0	0	0	0	0	0	0	0	0	0
90.87	25	1	1	1	0	1	0	0	1	0	0	0	0	0	0	0	0	0	0	0	0	0	0	0		1.57065e-12	1.4263e-13	4.21277e-13	1.46533e-12	0	7.19918e-12	0	0	9.37813e-11	0	0	0	0	0	0	0	0	0	0	0	0	0	0	0
92.268	22	4	1	0	0	0	0	0	0	0	0	0	0	0	0	0	0	0	0	0	0	0	0	0		1.38218e-12	5.70519e-13	4.21277e-13	0	0	0	0	0	0	0	0	0	0	0	0	0	0	0	0	0	0	0	0	0
93.666	16	3	1	0	0	2	1	0	0	0	0	0	0	0	0	0	0	0	0	0	0	0	0	0		1.00522e-12	4.27889e-13	4.21277e-13	0	0	1.43984e-11	1.78287e-11	0	0	0	0	0	0	0	0	0	0	0	0	0	0	0	0	0
95.064	30	2	2	0	0	0	0	1	0	0	0	0	0	0	0	0	0	0	0	0	0	0	0	0		1.88478e-12	2.85259e-13	8.42555e-13	0	0	0	0	3.9564e-11	0	0	0	0	0	0	0	0	0	0	0	0	0	0	0	0
96.462	25	1	0	0	1	0	0	0	0	0	0	0	0	0	0	0	0	0	0	0	0	0	0	0		1.57065e-12	1.4263e-13	0	0	3.21934e-12	0	0	0	0	0	0	0	0	0	0	0	0	0	0	0	0	0	0	0
97.86	31	2	1	0	1	0	0	0	0	0	0	0	0	0	0	0	0	0	0	0	0	0	0	0		1.94761e-12	2.85259e-13	4.21277e-13	0	3.21934e-12	0	0	0	0	0	0	0	0	0	0	0	0	0	0	0	0	0	0	0
99.258	27	0	2	1	0	0	0	0	1	0	0	0	0	0	0	0	0	0	0	0	0	0	0	0		1.69631e-12	0	8.42555e-13	1.46533e-12	0	0	0	0	9.37813e-11	0	0	0	0	0	0	0	0	0	0	0	0	0	0	0
100.656	27	1	2	0	1	0	0	0	0	0	0	0	0	0	0	0	0	0	0	0	0	0	0	0		1.69631e-12	1.4263e-13	8.42555e-13	0	3.21934e-12	0	0	0	0	0	0	0	0	0	0	0	0	0	0	0	0	0	0	0
102.054	39	4	3	1	0	1	1	0	0	0	0	0	0	0	0	0	0	0	0	0	0	0	0	0		2.45022e-12	5.70519e-13	1.26383e-12	1.46533e-12	0	7.19918e-12	1.78287e-11	0	0	0	0	0	0	0	0	0	0	0	0	0	0	0	0	0
103.452	86	9	2	1	2	1	0	0	1	0	0	0	0	0	0	0	0	0	0	0	0	0	0	0		5.40305e-12	1.28367e-12	8.42555e-13	1.46533e-12	6.43867e-12	7.19918e-12	0	0	9.37813e-11	0	0	0	0	0	0	0	0	0	0	0	0	0	0	0
104.85	76	9	5	2	3	2	3	1	2	0	0	0	1	0	0	0	0	0	0	0	0	0	0	0		4.77479e-12	1.28367e-12	2.10639e-12	2.93067e-12	9.65801e-12	1.43984e-11	5.34861e-11	3.9564e-11	1.87563e-10	0	0	0	1.46533e-09	0	0	0	0	0	0	0	0	0	0	0
106.248	121	12	8	3	0	5	3	1	1	1	0	0	0	0	0	0	0	0	0	0	0	0	0	0		7.60197e-12	1.71156e-12	3.37022e-12	4.396e-12	0	3.59959e-11	5.34861e-11	3.9564e-11	9.37813e-11	2.06038e-10	0	0	0	0	0	0	0	0	0	0	0	0	0	0
107.646	47	6	1	0	1	0	0	0	0	0	0	0	0	0	0	0	0	0	0	0	0	0	0	0		2.95283e-12	8.55778e-13	4.21277e-13	0	3.21934e-12	0	0	0	0	0	0	0	0	0	0	0	0	0	0	0	0	0	0	0
109.044	18	0	1	1	1	0	0	0	0	0	0	0	0	0	0	0	0	0	0	0	0	0	0	0		1.13087e-12	0	4.21277e-13	1.46533e-12	3.21934e-12	0	0	0	0	0	0	0	0	0	0	0	0	0	0	0	0	0	0	0
110.442	7	0	0	0	1	0	0	1	0	0	0	0	0	0	0	0	0	0	0	0	0	0	0	0		4.39783e-13	0	0	0	3.21934e-12	0	0	3.9564e-11	0	0	0	0	0	0	0	0	0	0	0	0	0	0	0	0
111.84	12	1	0	0	0	0	0	0	0	0	0	0	0	0	0	0	0	0	0	0	0	0	0	0		7.53914e-13	1.4263e-13	0	0	0	0	0	0	0	0	0	0	0	0	0	0	0	0	0	0	0	0	0	0
113.238	27	1	3	0	0	0	0	0	0	0	0	0	0	0	0	0	0	0	0	0	0	0	0	0		1.69631e-12	1.4263e-13	1.26383e-12	0	0	0	0	0	0	0	0	0	0	0	0	0	0	0	0	0	0	0	0	0
114.636	12	1	0	0	0	0	0	0	0	0	0	0	0	0	0	0	0	0	0	0	0	0	0	0		7.53914e-13	1.4263e-13	0	0	0	0	0	0	0	0	0	0	0	0	0	0	0	0	0	0	0	0	0	0
116.034	7	1	1	0	0	0	0	0	0	0	0	0	0	0	0	0	0	0	0	0	0	0	0	0		4.39783e-13	1.4263e-13	4.21277e-13	0	0	0	0	0	0	0	0	0	0	0	0	0	0	0	0	0	0	0	0	0
117.432	15	3	0	1	0	0	0	0	0	0	0	0	0	0	0	0	0	0	0	0	0	0	0	0		9.42392e-13	4.27889e-13	0	1.46533e-12	0	0	0	0	0	0	0	0	0	0	0	0	0	0	0	0	0	0	0	0
118.83	23	3	1	0	0	0	0	0	0	0	0	0	0	0	0	0	0	0	0	0	0	0	0	0		1.445e-12	4.27889e-13	4.21277e-13	0	0	0	0	0	0	0	0	0	0	0	0	0	0	0	0	0	0	0	0	0
120.228	22	3	0	1	1	0	0	0	0	0	0	0	0	0	0	0	0	0	0	0	0	0	0	0		1.38218e-12	4.27889e-13	0	1.46533e-12	3.21934e-12	0	0	0	0	0	0	0	0	0	0	0	0	0	0	0	0	0	0	0
121.626	15	0	1	0	0	0	1	0	0	0	0	0	0	0	0	0	0	0	0	0	0	0	0	0		9.42392e-13	0	4.21277e-13	0	0	0	1.78287e-11	0	0	0	0	0	0	0	0	0	0	0	0	0	0	0	0	0
123.024	15	1	0	0	0	0	0	0	0	0	0	0	0	0	0	0	0	0	0	0	0	0	0	0		9.42392e-13	1.4263e-13	0	0	0	0	0	0	0	0	0	0	0	0	0	0	0	0	0	0	0	0	0	0
124.422	23	3	0	0	0	0	0	0	0	0	0	0	0	0	0	0	0	0	0	0	0	0	0	0		1.445e-12	4.27889e-13	0	0	0	0	0	0	0	0	0	0	0	0	0	0	0	0	0	0	0	0	0	0
125.82	6	0	0	0	0	0	0	0	0	0	0	0	0	0	0	0	0	0	0	0	0	0	0	0		3.76957e-13	0	0	0	0	0	0	0	0	0	0	0	0	0	0	0	0	0	0	0	0	0	0	0
127.218	16	0	0	0	0	0	0	0	0	0	0	0	0	0	0	0	0	0	0	0	0	0	0	0		1.00522e-12	0	0	0	0	0	0	0	0	0	0	0	0	0	0	0	0	0	0	0	0	0	0	0
128.616	22	0	0	0	1	2	0	0	0	0	0	0	0	0	0	0	0	0	0	0	0	0	0	0		1.38218e-12	0	0	0	3.21934e-12	1.43984e-11	0	0	0	0	0	0	0	0	0	0	0	0	0	0	0	0	0	0
130.014	6	2	0	0	0	0	0	0	0	0	0	0	0	0	0	0	0	0	0	0	0	0	0	0		3.76957e-13	2.85259e-13	0	0	0	0	0	0	0	0	0	0	0	0	0	0	0	0	0	0	0	0	0	0
131.412	19	2	0	0	0	0	0	0	0	0	0	0	0	0	0	0	0	0	0	0	0	0	0	0		1.1937e-12	2.85259e-13	0	0	0	0	0	0	0	0	0	0	0	0	0	0	0	0	0	0	0	0	0	0
132.81	13	1	0	0	1	0	0	0	0	0	0	0	0	0	0	0	0	0	0	0	0	0	0	0		8.1674e-13	1.4263e-13	0	0	3.21934e-12	0	0	0	0	0	0	0	0	0	0	0	0	0	0	0	0	0	0	0
134.208	24	1	2	0	0	2	0	0	0	0	0	0	0	0	0	0	0	0	0	0	0	0	0	0		1.50783e-12	1.4263e-13	8.42555e-13	0	0	1.43984e-11	0	0	0	0	0	0	0	0	0	0	0	0	0	0	0	0	0	0
135.606	29	3	0	0	1	0	0	0	0	0	0	0	0	0	0	0	0	0	0	0	0	0	0	0		1.82196e-12	4.27889e-13	0	0	3.21934e-12	0	0	0	0	0	0	0	0	0	0	0	0	0	0	0	0	0	0	0
137.004	26	1	1	1	0	0	0	0	0	0	0	0	0	0	0	0	0	0	0	0	0	0	0	0		1.63348e-12	1.4263e-13	4.21277e-13	1.46533e-12	0	0	0	0	0	0	0	0	0	0	0	0	0	0	0	0	0	0	0	0
138.402	36	2	1	0	1	0	0	0	0	0	0	0	0	0	0	0	0	0	0	0	0	0	0	0		2.26174e-12	2.85259e-13	4.21277e-13	0	3.21934e-12	0	0	0	0	0	0	0	0	0	0	0	0	0	0	0	0	0	0	0
139.8	29	0	0	0	1	0	0	0	0	0	0	0	0	0	0	0	0	0	0	0	0	0	0	0		1.82196e-12	0	0	0	3.21934e-12	0	0	0	0	0	0	0	0	0	0	0	0	0	0	0	0	0	0	0
141.198	29	0	1	0	0	0	0	0	0	0	0	0	0	0	0	0	0	0	0	0	0	0	0	0		1.82196e-12	0	4.21277e-13	0	0	0	0	0	0	0	0	0	0	0	0	0	0	0	0	0	0	0	0	0
142.596	25	2	0	0	1	0	0	0	0	0	0	0	0	0	0	0	0	0	0	0	0	0	0	0		1.57065e-12	2.85259e-13	0	0	3.21934e-12	0	0	0	0	0	0	0	0	0	0	0	0	0	0	0	0	0	0	0
143.994	29	5	0	0	2	0	0	0	0	0	0	0	0	0	0	0	0	0	0	0	0	0	0	0		1.82196e-12	7.13148e-13	0	0	6.43867e-12	0	0	0	0	0	0	0	0	0	0	0	0	0	0	0	0	0	0	0
145.392	34	1	1	1	1	0	0	0	0	0	0	0	0	0	0	0	0	0	0	0	0	0	0	0		2.13609e-12	1.4263e-13	4.21277e-13	1.46533e-12	3.21934e-12	0	0	0	0	0	0	0	0	0	0	0	0	0	0	0	0	0	0	0
146.79	22	3	0	0	1	0	0	0	0	0	0	0	0	0	0	0	0	0	0	0	0	0	0	0		1.38218e-12	4.27889e-13	0	0	3.21934e-12	0	0	0	0	0	0	0	0	0	0	0	0	0	0	0	0	0	0	0
148.188	36	2	1	0	0	2	0	0	0	0	0	0	0	0	0	0	0	0	0	0	0	0	0	0		2.26174e-12	2.85259e-13	4.21277e-13	0	0	1.43984e-11	0	0	0	0	0	0	0	0	0	0	0	0	0	0	0	0	0	0
149.586	40	3	1	0	0	1	0	0	0	0	0	0	0	0	0	0	0	0	0	0	0	0	0	0		2.51305e-12	4.27889e-13	4.21277e-13	0	0	7.19918e-12	0	0	0	0	0	0	0	0	0	0	0	0	0	0	0	0	0	0
150.984	27	4	0	0	1	0	0	0	0	0	0	0	0	0	0	0	0	0	0	0	0	0	0	0		1.69631e-12	5.70519e-13	0	0	3.21934e-12	0	0	0	0	0	0	0	0	0	0	0	0	0	0	0	0	0	0	0
152.382	21	1	2	0	1	0	0	0	0	0	0	0	0	0	0	0	0	0	0	0	0	0	0	0		1.31935e-12	1.4263e-13	8.42555e-13	0	3.21934e-12	0	0	0	0	0	0	0	0	0	0	0	0	0	0	0	0	0	0	0
153.78	26	1	2	0	1	0	0	0	0	0	0	0	0	0	0	0	0	0	0	0	0	0	0	0		1.63348e-12	1.4263e-13	8.42555e-13	0	3.21934e-12	0	0	0	0	0	0	0	0	0	0	0	0	0	0	0	0	0	0	0
155.178	29	4	1	0	1	0	0	0	0	0	0	0	0	0	0	0	0	0	0	0	0	0	0	0		1.82196e-12	5.70519e-13	4.21277e-13	0	3.21934e-12	0	0	0	0	0	0	0	0	0	0	0	0	0	0	0	0	0	0	0
156.576	22	2	0	0	0	0	0	0	0	0	0	0	0	0	0	0	0	0	0	0	0	0	0	0		1.38218e-12	2.85259e-13	0	0	0	0	0	0	0	0	0	0	0	0	0	0	0	0	0	0	0	0	0	0
157.974	24	2	1	1	0	1	0	0	0	0	0	0	0	0	0	0	0	0	0	0	0	0	0	0		1.50783e-12	2.85259e-13	4.21277e-13	1.46533e-12	0	7.19918e-12	0	0	0	0	0	0	0	0	0	0	0	0	0	0	0	0	0	0
159.372	32	2	0	0	1	1	0	0	0	0	0	0	0	0	0	0	0	0	0	0	0	0	0	0		2.01044e-12	2.85259e-13	0	0	3.21934e-12	7.19918e-12	0	0	0	0	0	0	0	0	0	0	0	0	0	0	0	0	0	0
160.77	37	4	0	0	1	0	0	0	0	0	0	0	0	0	0	0	0	0	0	0	0	0	0	0		2.32457e-12	5.70519e-13	0	0	3.21934e-12	0	0	0	0	0	0	0	0	0	0	0	0	0	0	0	0	0	0	0
162.168	31	2	0	0	0	0	0	0	0	0	0	0	0	0	0	0	0	0	0	0	0	0	0	0		1.94761e-12	2.85259e-13	0	0	0	0	0	0	0	0	0	0	0	0	0	0	0	0	0	0	0	0	0	0
163.566	36	4	1	1	1	0	0	0	0	0	0	0	0	0	0	0	0	0	0	0	0	0	0	0		2.26174e-12	5.70519e-13	4.21277e-13	1.46533e-12	3.21934e-12	0	0	0	0	0	0	0	0	0	0	0	0	0	0	0	0	0	0	0
164.964	37	1	0	0	0	0	0	0	0	0	0	0	0	0	0	0	0	0	0	0	0	0	0	0		2.32457e-12	1.4263e-13	0	0	0	0	0	0	0	0	0	0	0	0	0	0	0	0	0	0	0	0	0	0
166.362	44	0	1	1	0	1	0	0	0	0	0	0	0	0	0	0	0	0	0	0	0	0	0	0		2.76435e-12	0	4.21277e-13	1.46533e-12	0	7.19918e-12	0	0	0	0	0	0	0	0	0	0	0	0	0	0	0	0	0	0
167.76	28	0	2	0	1	0	0	0	0	0	0	0	0	0	0	0	0	0	0	0	0	0	0	0		1.75913e-12	0	8.42555e-13	0	3.21934e-12	0	0	0	0	0	0	0	0	0	0	0	0	0	0	0	0	0	0	0
169.158	37	3	0	1	0	0	0	0	0	0	0	0	0	0	0	0	0	0	0	0	0	0	0	0		2.32457e-12	4.27889e-13	0	1.46533e-12	0	0	0	0	0	0	0	0	0	0	0	0	0	0	0	0	0	0	0	0
170.556	41	3	4	0	0	0	0	0	0	0	0	0	0	0	0	0	0	0	0	0	0	0	0	0		2.57587e-12	4.27889e-13	1.68511e-12	0	0	0	0	0	0	0	0	0	0	0	0	0	0	0	0	0	0	0	0	0
171.954	31	1	0	0	0	1	2	0	1	0	0	0	0	0	0	0	0	0	0	0	0	0	0	0		1.94761e-12	1.4263e-13	0	0	0	7.19918e-12	3.56574e-11	0	9.37813e-11	0	0	0	0	0	0	0	0	0	0	0	0	0	0	0
173.352	22	3	1	0	0	0	0	0	0	0	0	0	0	0	0	0	0	0	0	0	0	0	0	0		1.38218e-12	4.27889e-13	4.21277e-13	0	0	0	0	0	0	0	0	0	0	0	0	0	0	0	0	0	0	0	0	0
174.75	43	0	2	0	0	1	0	0	0	0	0	0	0	0	0	0	0	0	0	0	0	0	0	0		2.70153e-12	0	8.42555e-13	0	0	7.19918e-12	0	0	0	0	0	0	0	0	0	0	0	0	0	0	0	0	0	0
176.148	28	1	0	0	0	0	0	0	0	0	0	0	0	0	0	0	0	0	0	0	0	0	0	0		1.75913e-12	1.4263e-13	0	0	0	0	0	0	0	0	0	0	0	0	0	0	0	0	0	0	0	0	0	0
177.546	25	3	0	0	1	2	0	0	0	0	0	0	0	0	0	0	0	0	0	0	0	0	0	0		1.57065e-12	4.27889e-13	0	0	3.21934e-12	1.43984e-11	0	0	0	0	0	0	0	0	0	0	0	0	0	0	0	0	0	0
178.944	27	0	1	0	1	1	0	0	0	0	0	0	0	0	0	0	0	0	0	0	0	0	0	0		1.69631e-12	0	4.21277e-13	0	3.21934e-12	7.19918e-12	0	0	0	0	0	0	0	0	0	0	0	0	0	0	0	0	0	0
180.342	34	4	1	0	0	1	0	0	0	0	0	0	0	0	0	0	0	0	0	0	0	0	0	0		2.13609e-12	5.70519e-13	4.21277e-13	0	0	7.19918e-12	0	0	0	0	0	0	0	0	0	0	0	0	0	0	0	0	0	0
181.74	27	1	0	0	0	0	0	0	0	0	0	0	0	0	0	0	0	0	0	0	0	0	0	0		1.69631e-12	1.4263e-13	0	0	0	0	0	0	0	0	0	0	0	0	0	0	0	0	0	0	0	0	0	0
183.138	25	3	0	1	0	0	0	0	0	0	0	0	0	0	0	0	0	0	0	0	0	0	0	0		1.57065e-12	4.27889e-13	0	1.46533e-12	0	0	0	0	0	0	0	0	0	0	0	0	0	0	0	0	0	0	0	0
184.536	25	2	0	0	1	0	0	0	0	0	0	0	0	0	0	0	0	0	0	0	0	0	0	0		1.57065e-12	2.85259e-13	0	0	3.21934e-12	0	0	0	0	0	0	0	0	0	0	0	0	0	0	0	0	0	0	0
185.934	26	2	0	0	2	0	1	0	0	0	0	0	0	0	0	0	0	0	0	0	0	0	0	0		1.63348e-12	2.85259e-13	0	0	6.43867e-12	0	1.78287e-11	0	0	0	0	0	0	0	0	0	0	0	0	0	0	0	0	0
187.332	22	1	2	0	0	1	0	0	0	0	0	0	0	0	0	0	0	0	0	0	0	0	0	0		1.38218e-12	1.4263e-13	8.42555e-13	0	0	7.19918e-12	0	0	0	0	0	0	0	0	0	0	0	0	0	0	0	0	0	0
188.73	32	0	1	0	0	0	0	0	0	0	0	0	0	0	0	0	0	0	0	0	0	0	0	0		2.01044e-12	0	4.21277e-13	0	0	0	0	0	0	0	0	0	0	0	0	0	0	0	0	0	0	0	0	0
190.128	41	2	0	0	1	1	0	0	0	0	0	0	0	0	0	0	0	0	0	0	0	0	0	0		2.57587e-12	2.85259e-13	0	0	3.21934e-12	7.19918e-12	0	0	0	0	0	0	0	0	0	0	0	0	0	0	0	0	0	0
191.526	21	1	2	0	2	0	0	0	0	0	0	0	0	0	0	0	0	0	0	0	0	0	0	0		1.31935e-12	1.4263e-13	8.42555e-13	0	6.43867e-12	0	0	0	0	0	0	0	0	0	0	0	0	0	0	0	0	0	0	0
192.924	26	2	0	0	0	0	0	0	0	0	0	0	0	0	0	0	0	0	0	0	0	0	0	0		1.63348e-12	2.85259e-13	0	0	0	0	0	0	0	0	0	0	0	0	0	0	0	0	0	0	0	0	0	0
194.322	26	1	0	0	0	0	2	0	0	0	0	0	0	0	0	0	0	0	0	0	0	0	0	0		1.63348e-12	1.4263e-13	0	0	0	0	3.56574e-11	0	0	0	0	0	0	0	0	0	0	0	0	0	0	0	0	0
195.72	36	3	0	0	1	0	0	0	0	0	0	0	0	0	0	0	0	0	0	0	0	0	0	0		2.26174e-12	4.27889e-13	0	0	3.21934e-12	0	0	0	0	0	0	0	0	0	0	0	0	0	0	0	0	0	0	0
197.118	22	4	3	0	0	0	0	0	0	0	0	0	0	0	0	0	0	0	0	0	0	0	0	0		1.38218e-12	5.70519e-13	1.26383e-12	0	0	0	0	0	0	0	0	0	0	0	0	0	0	0	0	0	0	0	0	0
198.516	31	1	0	0	0	0	0	0	0	0	0	0	0	0	0	0	0	0	0	0	0	0	0	0		1.94761e-12	1.4263e-13	0	0	0	0	0	0	0	0	0	0	0	0	0	0	0	0	0	0	0	0	0	0
199.914	31	1	0	0	3	0	0	0	0	0	0	0	0	0	0	0	0	0	0	0	0	0	0	0		1.94761e-12	1.4263e-13	0	0	9.65801e-12	0	0	0	0	0	0	0	0	0	0	0	0	0	0	0	0	0	0	0
201.312	24	4	0	0	0	0	0	0	0	0	0	0	0	0	0	0	0	0	0	0	0	0	0	0		1.50783e-12	5.70519e-13	0	0	0	0	0	0	0	0	0	0	0	0	0	0	0	0	0	0	0	0	0	0
202.71	35	2	1	1	0	0	0	0	0	0	0	0	0	0	0	0	0	0	0	0	0	0	0	0		2.19892e-12	2.85259e-13	4.21277e-13	1.46533e-12	0	0	0	0	0	0	0	0	0	0	0	0	0	0	0	0	0	0	0	0
204.108	21	0	1	0	0	2	0	2	0	0	0	0	0	0	0	0	0	0	0	0	0	0	0	0		1.31935e-12	0	4.21277e-13	0	0	1.43984e-11	0	7.9128e-11	0	0	0	0	0	0	0	0	0	0	0	0	0	0	0	0
205.506	26	1	1	0	2	1	0	0	0	0	0	0	0	0	0	0	0	0	0	0	0	0	0	0		1.63348e-12	1.4263e-13	4.21277e-13	0	6.43867e-12	7.19918e-12	0	0	0	0	0	0	0	0	0	0	0	0	0	0	0	0	0	0
206.904	17	3	2	0	0	1	0	0	0	0	0	0	0	0	0	0	0	0	0	0	0	0	0	0		1.06804e-12	4.27889e-13	8.42555e-13	0	0	7.19918e-12	0	0	0	0	0	0	0	0	0	0	0	0	0	0	0	0	0	0
208.302	25	2	0	0	0	0	0	0	0	0	0	0	0	0	0	0	0	0	0	0	0	0	0	0		1.57065e-12	2.85259e-13	0	0	0	0	0	0	0	0	0	0	0	0	0	0	0	0	0	0	0	0	0	0
209.7	33	2	1	0	1	0	0	1	0	1	0	0	0	0	0	0	0	0	0	0	0	0	0	0		2.07326e-12	2.85259e-13	4.21277e-13	0	3.21934e-12	0	0	3.9564e-11	0	2.06038e-10	0	0	0	0	0	0	0	0	0	0	0	0	0	0
211.098	24	1	2	0	0	1	0	0	0	0	0	0	0	0	0	0	0	0	0	0	0	0	0	0		1.50783e-12	1.4263e-13	8.42555e-13	0	0	7.19918e-12	0	0	0	0	0	0	0	0	0	0	0	0	0	0	0	0	0	0
212.496	28	1	2	0	0	0	2	0	0	0	0	0	0	0	0	0	0	0	0	0	0	0	0	0		1.75913e-12	1.4263e-13	8.42555e-13	0	0	0	3.56574e-11	0	0	0	0	0	0	0	0	0	0	0	0	0	0	0	0	0
213.894	39	3	4	2	1	0	0	0	0	0	0	0	0	0	0	0	0	0	0	0	0	0	0	0		2.45022e-12	4.27889e-13	1.68511e-12	2.93067e-12	3.21934e-12	0	0	0	0	0	0	0	0	0	0	0	0	0	0	0	0	0	0	0
215.292	37	2	0	0	0	0	0	0	0	0	0	0	0	0	0	0	0	0	0	0	0	0	0	0		2.32457e-12	2.85259e-13	0	0	0	0	0	0	0	0	0	0	0	0	0	0	0	0	0	0	0	0	0	0
216.69	28	3	1	0	0	0	0	0	0	0	0	0	0	0	0	0	0	0	0	0	0	0	0	0		1.75913e-12	4.27889e-13	4.21277e-13	0	0	0	0	0	0	0	0	0	0	0	0	0	0	0	0	0	0	0	0	0
218.088	28	2	0	0	0	0	0	0	0	0	0	0	0	0	0	0	0	0	0	0	0	0	0	0		1.75913e-12	2.85259e-13	0	0	0	0	0	0	0	0	0	0	0	0	0	0	0	0	0	0	0	0	0	0
219.486	31	0	0	0	1	2	0	0	0	0	0	0	0	0	0	0	0	0	0	0	0	0	0	0		1.94761e-12	0	0	0	3.21934e-12	1.43984e-11	0	0	0	0	0	0	0	0	0	0	0	0	0	0	0	0	0	0
220.884	22	1	1	0	0	0	0	0	0	0	0	0	0	0	0	0	0	0	0	0	0	0	0	0		1.38218e-12	1.4263e-13	4.21277e-13	0	0	0	0	0	0	0	0	0	0	0	0	0	0	0	0	0	0	0	0	0
222.282	29	1	0	0	0	0	0	0	0	0	0	0	0	0	0	0	0	0	0	0	0	0	0	0		1.82196e-12	1.4263e-13	0	0	0	0	0	0	0	0	0	0	0	0	0	0	0	0	0	0	0	0	0	0
223.68	35	2	0	0	0	0	0	0	0	0	0	0	0	0	0	0	0	0	0	0	0	0	0	0		2.19892e-12	2.85259e-13	0	0	0	0	0	0	0	0	0	0	0	0	0	0	0	0	0	0	0	0	0	0
225.078	36	2	1	0	1	0	1	0	0	0	0	0	0	0	0	0	0	0	0	0	0	0	0	0		2.26174e-12	2.85259e-13	4.21277e-13	0	3.21934e-12	0	1.78287e-11	0	0	0	0	0	0	0	0	0	0	0	0	0	0	0	0	0
226.476	39	2	0	0	0	0	0	0	0	0	0	0	0	0	0	0	0	0	0	0	0	0	0	0		2.45022e-12	2.85259e-13	0	0	0	0	0	0	0	0	0	0	0	0	0	0	0	0	0	0	0	0	0	0
227.874	42	3	1	2	0	1	0	0	0	0	0	0	0	0	0	0	0	0	0	0	0	0	0	0		2.6387e-12	4.27889e-13	4.21277e-13	2.93067e-12	0	7.19918e-12	0	0	0	0	0	0	0	0	0	0	0	0	0	0	0	0	0	0
229.272	26	3	1	0	0	0	0	0	0	0	0	0	0	0	0	0	0	0	0	0	0	0	0	0		1.63348e-12	4.27889e-13	4.21277e-13	0	0	0	0	0	0	0	0	0	0	0	0	0	0	0	0	0	0	0	0	0
230.67	31	1	1	0	1	0	0	1	0	0	0	0	0	0	0	0	0	0	0	0	0	0	0	0		1.94761e-12	1.4263e-13	4.21277e-13	0	3.21934e-12	0	0	3.9564e-11	0	0	0	0	0	0	0	0	0	0	0	0	0	0	0	0
232.068	28	4	0	1	0	1	0	0	0	0	0	0	0	0	0	0	0	0	0	0	0	0	0	0		1.75913e-12	5.70519e-13	0	1.46533e-12	0	7.19918e-12	0	0	0	0	0	0	0	0	0	0	0	0	0	0	0	0	0	0
233.466	43	0	2	0	1	0	0	1	0	0	0	0	0	0	0	0	0	0	0	0	0	0	0	0		2.70153e-12	0	8.42555e-13	0	3.21934e-12	0	0	3.9564e-11	0	0	0	0	0	0	0	0	0	0	0	0	0	0	0	0
234.864	33	1	1	0	0	0	0	0	0	0	0	0	0	0	0	0	0	0	0	0	0	0	0	0		2.07326e-12	1.4263e-13	4.21277e-13	0	0	0	0	0	0	0	0	0	0	0	0	0	0	0	0	0	0	0	0	0
236.262	27	1	0	0	0	0	0	1	0	0	0	0	0	0	0	0	0	0	0	0	0	0	0	0		1.69631e-12	1.4263e-13	0	0	0	0	0	3.9564e-11	0	0	0	0	0	0	0	0	0	0	0	0	0	0	0	0
237.66	25	5	1	0	0	0	0	1	0	0	0	0	0	0	0	0	0	0	0	0	0	0	0	0		1.57065e-12	7.13148e-13	4.21277e-13	0	0	0	0	3.9564e-11	0	0	0	0	0	0	0	0	0	0	0	0	0	0	0	0
239.058	25	1	0	0	0	0	0	0	0	0	0	0	0	0	0	0	0	0	0	0	0	0	0	0		1.57065e-12	1.4263e-13	0	0	0	0	0	0	0	0	0	0	0	0	0	0	0	0	0	0	0	0	0	0
240.456	27	3	1	0	1	0	0	0	0	0	0	0	0	0	0	0	0	0	0	0	0	0	0	0		1.69631e-12	4.27889e-13	4.21277e-13	0	3.21934e-12	0	0	0	0	0	0	0	0	0	0	0	0	0	0	0	0	0	0	0
241.854	32	6	0	0	0	0	0	0	1	0	0	0	0	0	0	0	0	0	0	0	0	0	0	0		2.01044e-12	8.55778e-13	0	0	0	0	0	0	9.37813e-11	0	0	0	0	0	0	0	0	0	0	0	0	0	0	0
243.252	35	4	0	1	1	0	0	0	0	0	0	0	0	0	0	0	0	0	0	0	0	0	0	0		2.19892e-12	5.70519e-13	0	1.46533e-12	3.21934e-12	0	0	0	0	0	0	0	0	0	0	0	0	0	0	0	0	0	0	0
244.65	28	1	0	0	1	1	0	0	0	0	0	0	0	0	0	0	0	0	0	0	0	0	0	0		1.75913e-12	1.4263e-13	0	0	3.21934e-12	7.19918e-12	0	0	0	0	0	0	0	0	0	0	0	0	0	0	0	0	0	0
246.048	30	0	0	1	3	0	0	0	0	0	0	0	0	0	0	0	0	0	0	0	0	0	0	0		1.88478e-12	0	0	1.46533e-12	9.65801e-12	0	0	0	0	0	0	0	0	0	0	0	0	0	0	0	0	0	0	0
247.446	21	0	2	1	1	0	0	0	0	0	0	0	0	0	0	0	0	0	0	0	0	0	0	0		1.31935e-12	0	8.42555e-13	1.46533e-12	3.21934e-12	0	0	0	0	0	0	0	0	0	0	0	0	0	0	0	0	0	0	0
248.844	23	0	0	0	1	0	1	0	0	0	0	0	0	0	0	0	0	0	0	0	0	0	0	0		1.445e-12	0	0	0	3.21934e-12	0	1.78287e-11	0	0	0	0	0	0	0	0	0	0	0	0	0	0	0	0	0
250.242	22	1	0	2	1	0	0	0	0	0	0	0	0	0	0	0	0	0	0	0	0	0	0	0		1.38218e-12	1.4263e-13	0	2.93067e-12	3.21934e-12	0	0	0	0	0	0	0	0	0	0	0	0	0	0	0	0	0	0	0
251.64	32	5	2	1	0	1	0	0	0	0	0	0	0	0	0	0	0	0	0	0	0	0	0	0		2.01044e-12	7.13148e-13	8.42555e-13	1.46533e-12	0	7.19918e-12	0	0	0	0	0	0	0	0	0	0	0	0	0	0	0	0	0	0
253.038	24	3	1	0	0	0	0	0	0	0	0	0	0	0	0	0	0	0	0	0	0	0	0	0		1.50783e-12	4.27889e-13	4.21277e-13	0	0	0	0	0	0	0	0	0	0	0	0	0	0	0	0	0	0	0	0	0
254.436	37	1	1	0	0	0	0	1	0	0	0	0	0	0	0	0	0	0	0	0	0	0	0	0		2.32457e-12	1.4263e-13	4.21277e-13	0	0	0	0	3.9564e-11	0	0	0	0	0	0	0	0	0	0	0	0	0	0	0	0
255.834	30	3	3	1	0	1	0	0	0	0	0	0	0	0	0	0	0	0	0	0	0	0	0	0		1.88478e-12	4.27889e-13	1.26383e-12	1.46533e-12	0	7.19918e-12	0	0	0	0	0	0	0	0	0	0	0	0	0	0	0	0	0	0
257.232	25	4	1	0	1	1	0	0	0	0	0	0	0	0	0	0	0	0	0	0	0	0	0	0		1.57065e-12	5.70519e-13	4.21277e-13	0	3.21934e-12	7.19918e-12	0	0	0	0	0	0	0	0	0	0	0	0	0	0	0	0	0	0
258.63	27	3	2	0	0	1	0	0	0	0	0	0	0	0	0	0	0	0	0	0	0	0	0	0		1.69631e-12	4.27889e-13	8.42555e-13	0	0	7.19918e-12	0	0	0	0	0	0	0	0	0	0	0	0	0	0	0	0	0	0
260.028	24	4	2	1	0	0	0	0	0	0	0	0	0	0	0	0	0	0	0	0	0	0	0	0		1.50783e-12	5.70519e-13	8.42555e-13	1.46533e-12	0	0	0	0	0	0	0	0	0	0	0	0	0	0	0	0	0	0	0	0
261.426	26	3	1	0	0	0	0	0	0	0	0	0	0	0	0	0	0	0	0	0	0	0	0	0		1.63348e-12	4.27889e-13	4.21277e-13	0	0	0	0	0	0	0	0	0	0	0	0	0	0	0	0	0	0	0	0	0
262.824	33	0	0	0	0	0	0	0	0	0	0	0	0	0	0	0	0	0	0	0	0	0	0	0		2.07326e-12	0	0	0	0	0	0	0	0	0	0	0	0	0	0	0	0	0	0	0	0	0	0	0
264.222	31	5	0	0	0	0	2	0	1	0	0	0	0	0	0	0	0	0	0	0	0	0	0	0		1.94761e-12	7.13148e-13	0	0	0	0	3.56574e-11	0	9.37813e-11	0	0	0	0	0	0	0	0	0	0	0	0	0	0	0
265.62	35	1	0	0	0	0	0	1	0	0	0	0	0	0	0	0	0	0	0	0	0	0	0	0		2.19892e-12	1.4263e-13	0	0	0	0	0	3.9564e-11	0	0	0	0	0	0	0	0	0	0	0	0	0	0	0	0
267.018	28	4	0	1	0	0	0	0	0	0	0	0	0	0	0	0	0	0	0	0	0	0	0	0		1.75913e-12	5.70519e-13	0	1.46533e-12	0	0	0	0	0	0	0	0	0	0	0	0	0	0	0	0	0	0	0	0
268.416	22	1	1	0	0	0	0	0	0	0	0	1	0	0	0	0	0	0	0	0	0	0	0	0		1.38218e-12	1.4263e-13	4.21277e-13	0	0	0	0	0	0	0	0	7.50251e-10	0	0	0	0	0	0	0	0	0	0	0	0
269.814	37	0	0	0	0	0	1	0	0	0	0	0	0	0	0	0	0	0	0	0	0	0	0	0		2.32457e-12	0	0	0	0	0	1.78287e-11	0	0	0	0	0	0	0	0	0	0	0	0	0	0	0	0	0
271.212	26	0	0	0	0	0	0	0	0	0	0	0	0	0	0	0	0	0	0	0	0	0	0	0		1.63348e-12	0	0	0	0	0	0	0	0	0	0	0	0	0	0	0	0	0	0	0	0	0	0	0
272.61	28	1	1	0	1	0	0	0	0	0	0	0	0	0	0	0	0	0	0	0	0	0	0	0		1.75913e-12	1.4263e-13	4.21277e-13	0	3.21934e-12	0	0	0	0	0	0	0	0	0	0	0	0	0	0	0	0	0	0	0
274.008	23	3	0	0	0	0	0	0	0	0	0	0	0	0	0	0	0	0	0	0	0	0	0	0		1.445e-12	4.27889e-13	0	0	0	0	0	0	0	0	0	0	0	0	0	0	0	0	0	0	0	0	0	0
275.406	41	1	0	0	2	1	0	0	0	0	0	0	0	0	0	0	0	0	0	0	0	0	0	0		2.57587e-12	1.4263e-13	0	0	6.43867e-12	7.19918e-12	0	0	0	0	0	0	0	0	0	0	0	0	0	0	0	0	0	0
276.804	35	3	0	0	0	0	1	0	0	0	0	0	0	0	0	0	0	0	0	0	0	0	0	0		2.19892e-12	4.27889e-13	0	0	0	0	1.78287e-11	0	0	0	0	0	0	0	0	0	0	0	0	0	0	0	0	0
278.202	33	1	2	0	1	0	0	0	0	0	0	0	0	0	0	0	0	0	0	0	0	0	0	0		2.07326e-12	1.4263e-13	8.42555e-13	0	3.21934e-12	0	0	0	0	0	0	0	0	0	0	0	0	0	0	0	0	0	0	0
279.6	35	2	1	0	1	1	0	0	0	0	0	0	0	0	0	0	0	0	0	0	0	0	0	0		2.19892e-12	2.85259e-13	4.21277e-13	0	3.21934e-12	7.19918e-12	0	0	0	0	0	0	0	0	0	0	0	0	0	0	0	0	0	0
280.998	32	3	1	0	0	0	0	0	0	0	0	0	0	0	0	0	0	0	0	0	0	0	0	0		2.01044e-12	4.27889e-13	4.21277e-13	0	0	0	0	0	0	0	0	0	0	0	0	0	0	0	0	0	0	0	0	0
282.396	32	1	2	0	2	0	0	0	0	0	0	0	0	0	0	0	0	0	0	0	0	0	0	0		2.01044e-12	1.4263e-13	8.42555e-13	0	6.43867e-12	0	0	0	0	0	0	0	0	0	0	0	0	0	0	0	0	0	0	0
283.794	41	2	0	0	0	0	0	0	0	0	0	0	0	0	0	0	0	0	0	0	0	0	0	0		2.57587e-12	2.85259e-13	0	0	0	0	0	0	0	0	0	0	0	0	0	0	0	0	0	0	0	0	0	0
285.192	29	1	1	0	0	1	1	0	0	0	0	0	0	0	0	0	0	0	0	0	0	0	0	0		1.82196e-12	1.4263e-13	4.21277e-13	0	0	7.19918e-12	1.78287e-11	0	0	0	0	0	0	0	0	0	0	0	0	0	0	0	0	0
286.59	31	2	1	0	1	2	0	0	0	0	0	0	0	0	0	0	0	0	0	0	0	0	0	0		1.94761e-12	2.85259e-13	4.21277e-13	0	3.21934e-12	1.43984e-11	0	0	0	0	0	0	0	0	0	0	0	0	0	0	0	0	0	0
287.988	40	3	1	0	2	0	0	1	0	0	0	0	0	0	0	0	0	0	0	0	0	0	0	0		2.51305e-12	4.27889e-13	4.21277e-13	0	6.43867e-12	0	0	3.9564e-11	0	0	0	0	0	0	0	0	0	0	0	0	0	0	0	0
289.386	21	1	0	0	0	0	0	0	0	0	0	0	0	0	0	0	0	0	0	0	0	0	0	0		1.31935e-12	1.4263e-13	0	0	0	0	0	0	0	0	0	0	0	0	0	0	0	0	0	0	0	0	0	0
290.784	36	2	1	0	1	0	1	0	0	0	0	0	0	0	0	0	0	0	0	0	0	0	0	0		2.26174e-12	2.85259e-13	4.21277e-13	0	3.21934e-12	0	1.78287e-11	0	0	0	0	0	0	0	0	0	0	0	0	0	0	0	0	0
292.182	30	2	0	1	0	0	0	0	0	0	0	0	0	0	0	0	0	0	0	0	0	0	0	0		1.88478e-12	2.85259e-13	0	1.46533e-12	0	0	0	0	0	0	0	0	0	0	0	0	0	0	0	0	0	0	0	0
293.58	34	1	0	0	0	0	0	0	0	0	0	0	0	0	0	0	0	0	0	0	0	0	0	0		2.13609e-12	1.4263e-13	0	0	0	0	0	0	0	0	0	0	0	0	0	0	0	0	0	0	0	0	0	0
294.978	32	3	1	0	0	1	1	0	0	0	0	0	0	0	0	0	0	0	0	0	0	0	0	0		2.01044e-12	4.27889e-13	4.21277e-13	0	0	7.19918e-12	1.78287e-11	0	0	0	0	0	0	0	0	0	0	0	0	0	0	0	0	0
296.376	36	3	1	0	0	0	0	0	0	0	0	0	0	0	0	0	0	0	0	0	0	0	0	0		2.26174e-12	4.27889e-13	4.21277e-13	0	0	0	0	0	0	0	0	0	0	0	0	0	0	0	0	0	0	0	0	0
297.774	39	5	2	0	0	0	0	0	1	0	0	0	0	0	0	0	0	0	0	0	0	0	0	0		2.45022e-12	7.13148e-13	8.42555e-13	0	0	0	0	0	9.37813e-11	0	0	0	0	0	0	0	0	0	0	0	0	0	0	0
299.172	45	1	1	0	0	0	0	0	0	0	0	0	0	0	0	0	0	0	0	0	0	0	0	0		2.82718e-12	1.4263e-13	4.21277e-13	0	0	0	0	0	0	0	0	0	0	0	0	0	0	0	0	0	0	0	0	0
300.57	34	2	0	0	0	0	1	0	0	0	0	0	0	0	0	0	0	0	0	0	0	0	0	0		2.13609e-12	2.85259e-13	0	0	0	0	1.78287e-11	0	0	0	0	0	0	0	0	0	0	0	0	0	0	0	0	0
301.968	40	3	2	1	0	0	1	0	0	0	0	0	0	0	0	0	0	0	0	0	0	0	0	0		2.51305e-12	4.27889e-13	8.42555e-13	1.46533e-12	0	0	1.78287e-11	0	0	0	0	0	0	0	0	0	0	0	0	0	0	0	0	0
303.366	35	1	1	0	0	1	0	0	0	0	0	0	0	0	0	0	0	0	0	0	0	0	0	0		2.19892e-12	1.4263e-13	4.21277e-13	0	0	7.19918e-12	0	0	0	0	0	0	0	0	0	0	0	0	0	0	0	0	0	0
304.764	29	1	2	0	0	0	0	0	0	0	0	0	0	0	0	0	0	0	0	0	0	0	0	0		1.82196e-12	1.4263e-13	8.42555e-13	0	0	0	0	0	0	0	0	0	0	0	0	0	0	0	0	0	0	0	0	0
306.162	34	5	0	0	0	0	0	0	0	0	0	0	0	0	0	0	0	0	0	0	0	0	0	0		2.13609e-12	7.13148e-13	0	0	0	0	0	0	0	0	0	0	0	0	0	0	0	0	0	0	0	0	0	0
307.56	35	2	0	1	0	0	0	1	0	0	0	0	0	0	0	0	0	0	0	0	0	0	0	0		2.19892e-12	2.85259e-13	0	1.46533e-12	0	0	0	3.9564e-11	0	0	0	0	0	0	0	0	0	0	0	0	0	0	0	0
308.958	33	2	0	0	0	0	1	0	0	0	0	0	0	0	0	0	0	0	0	0	0	0	0	0		2.07326e-12	2.85259e-13	0	0	0	0	1.78287e-11	0	0	0	0	0	0	0	0	0	0	0	0	0	0	0	0	0
310.356	35	1	1	0	2	0	0	0	0	0	0	0	0	0	0	0	0	0	0	0	0	0	0	0		2.19892e-12	1.4263e-13	4.21277e-13	0	6.43867e-12	0	0	0	0	0	0	0	0	0	0	0	0	0	0	0	0	0	0	0
311.754	43	3	1	0	0	0	0	0	0	0	0	0	0	0	0	0	0	0	0	0	0	0	0	0		2.70153e-12	4.27889e-13	4.21277e-13	0	0	0	0	0	0	0	0	0	0	0	0	0	0	0	0	0	0	0	0	0
313.152	33	3	1	0	2	1	0	0	0	0	0	0	0	0	0	0	0	0	0	0	0	0	0	0		2.07326e-12	4.27889e-13	4.21277e-13	0	6.43867e-12	7.19918e-12	0	0	0	0	0	0	0	0	0	0	0	0	0	0	0	0	0	0
314.55	36	2	2	0	0	0	0	0	0	0	0	0	0	0	0	0	0	0	0	0	0	0	0	0		2.26174e-12	2.85259e-13	8.42555e-13	0	0	0	0	0	0	0	0	0	0	0	0	0	0	0	0	0	0	0	0	0
315.948	30	1	2	1	0	0	0	0	0	0	0	0	0	0	0	0	0	0	0	0	0	0	0	0		1.88478e-12	1.4263e-13	8.42555e-13	1.46533e-12	0	0	0	0	0	0	0	0	0	0	0	0	0	0	0	0	0	0	0	0
317.346	34	2	1	0	0	0	0	0	0	0	0	0	0	0	0	0	0	0	0	0	0	0	0	0		2.13609e-12	2.85259e-13	4.21277e-13	0	0	0	0	0	0	0	0	0	0	0	0	0	0	0	0	0	0	0	0	0
318.744	32	2	3	0	1	1	0	0	0	0	0	0	0	0	0	0	0	0	0	0	0	0	0	0		2.01044e-12	2.85259e-13	1.26383e-12	0	3.21934e-12	7.19918e-12	0	0	0	0	0	0	0	0	0	0	0	0	0	0	0	0	0	0
320.142	33	1	2	0	1	0	0	0	0	0	0	0	0	0	0	0	0	0	0	0	0	0	0	0		2.07326e-12	1.4263e-13	8.42555e-13	0	3.21934e-12	0	0	0	0	0	0	0	0	0	0	0	0	0	0	0	0	0	0	0
321.54	32	1	0	0	1	0	0	0	0	0	0	0	0	0	0	0	0	0	0	0	0	0	0	0		2.01044e-12	1.4263e-13	0	0	3.21934e-12	0	0	0	0	0	0	0	0	0	0	0	0	0	0	0	0	0	0	0
322.938	30	1	0	0	1	0	0	0	0	0	0	0	0	0	0	0	0	0	0	0	0	0	0	0		1.88478e-12	1.4263e-13	0	0	3.21934e-12	0	0	0	0	0	0	0	0	0	0	0	0	0	0	0	0	0	0	0
324.336	26	7	0	0	1	1	0	0	0	0	0	0	0	0	0	0	0	0	0	0	0	0	0	0		1.63348e-12	9.98408e-13	0	0	3.21934e-12	7.19918e-12	0	0	0	0	0	0	0	0	0	0	0	0	0	0	0	0	0	0
325.734	24	4	0	0	2	0	0	0	0	0	0	0	0	0	0	0	0	0	0	0	0	0	0	0		1.50783e-12	5.70519e-13	0	0	6.43867e-12	0	0	0	0	0	0	0	0	0	0	0	0	0	0	0	0	0	0	0
327.132	36	1	0	0	1	0	0	0	0	0	0	0	0	0	0	0	0	0	0	0	0	0	0	0		2.26174e-12	1.4263e-13	0	0	3.21934e-12	0	0	0	0	0	0	0	0	0	0	0	0	0	0	0	0	0	0	0
328.53	38	4	0	0	1	0	0	0	0	0	0	0	0	0	0	0	0	0	0	0	0	0	0	0		2.38739e-12	5.70519e-13	0	0	3.21934e-12	0	0	0	0	0	0	0	0	0	0	0	0	0	0	0	0	0	0	0
329.928	27	3	0	0	0	0	0	0	0	0	0	0	0	0	0	0	0	0	0	0	0	0	0	0		1.69631e-12	4.27889e-13	0	0	0	0	0	0	0	0	0	0	0	0	0	0	0	0	0	0	0	0	0	0
331.326	23	1	1	0	0	0	0	0	0	0	0	0	0	0	0	0	0	0	0	0	0	0	0	0		1.445e-12	1.4263e-13	4.21277e-13	0	0	0	0	0	0	0	0	0	0	0	0	0	0	0	0	0	0	0	0	0
332.724	29	3	4	0	0	0	0	0	0	0	0	0	0	0	0	0	0	0	0	0	0	0	0	0		1.82196e-12	4.27889e-13	1.68511e-12	0	0	0	0	0	0	0	0	0	0	0	0	0	0	0	0	0	0	0	0	0
334.122	37	4	0	1	0	0	0	0	0	0	0	0	0	0	0	0	0	0	0	0	0	0	0	0		2.32457e-12	5.70519e-13	0	1.46533e-12	0	0	0	0	0	0	0	0	0	0	0	0	0	0	0	0	0	0	0	0
335.52	46	2	0	0	1	0	0	0	0	0	0	0	0	0	0	0	0	0	0	0	0	0	0	0		2.89e-12	2.85259e-13	0	0	3.21934e-12	0	0	0	0	0	0	0	0	0	0	0	0	0	0	0	0	0	0	0
336.918	43	2	0	0	0	0	0	0	0	0	0	0	0	0	0	0	0	0	0	0	0	0	0	0		2.70153e-12	2.85259e-13	0	0	0	0	0	0	0	0	0	0	0	0	0	0	0	0	0	0	0	0	0	0
338.316	40	2	1	0	0	2	0	0	0	0	0	0	0	0	0	0	0	0	0	0	0	0	0	0		2.51305e-12	2.85259e-13	4.21277e-13	0	0	1.43984e-11	0	0	0	0	0	0	0	0	0	0	0	0	0	0	0	0	0	0
339.714	34	2	0	0	0	0	1	0	0	0	0	0	0	0	0	0	0	0	0	0	0	0	0	0		2.13609e-12	2.85259e-13	0	0	0	0	1.78287e-11	0	0	0	0	0	0	0	0	0	0	0	0	0	0	0	0	0
341.112	22	0	2	0	0	0	1	0	0	0	0	0	0	0	0	0	0	0	0	0	0	0	0	0		1.38218e-12	0	8.42555e-13	0	0	0	1.78287e-11	0	0	0	0	0	0	0	0	0	0	0	0	0	0	0	0	0
342.51	43	4	1	1	0	0	0	0	0	0	0	0	0	0	0	0	0	0	0	0	0	0	0	0		2.70153e-12	5.70519e-13	4.21277e-13	1.46533e-12	0	0	0	0	0	0	0	0	0	0	0	0	0	0	0	0	0	0	0	0
343.908	32	2	2	0	0	0	0	0	0	0	0	0	0	0	0	0	0	0	0	0	0	0	0	0		2.01044e-12	2.85259e-13	8.42555e-13	0	0	0	0	0	0	0	0	0	0	0	0	0	0	0	0	0	0	0	0	0
345.306	26	0	0	0	0	0	0	0	0	0	0	0	0	0	0	0	0	0	0	0	0	0	0	0		1.63348e-12	0	0	0	0	0	0	0	0	0	0	0	0	0	0	0	0	0	0	0	0	0	0	0
346.704	30	3	1	0	1	0	0	0	0	0	0	0	0	0	0	0	0	0	0	0	0	0	0	0		1.88478e-12	4.27889e-13	4.21277e-13	0	3.21934e-12	0	0	0	0	0	0	0	0	0	0	0	0	0	0	0	0	0	0	0
348.102	32	2	3	0	1	0	0	0	0	0	0	0	0	0	0	0	0	0	0	0	0	0	0	0		2.01044e-12	2.85259e-13	1.26383e-12	0	3.21934e-12	0	0	0	0	0	0	0	0	0	0	0	0	0	0	0	0	0	0	0
349.5	34	0	0	0	0	0	0	0	0	0	0	0	0	0	0	0	0	0	0	0	0	0	0	0		2.13609e-12	0	0	0	0	0	0	0	0	0	0	0	0	0	0	0	0	0	0	0	0	0	0	0
350.898	33	1	2	0	0	0	0	0	0	0	0	0	0	0	0	0	0	0	0	0	0	0	0	0		2.07326e-12	1.4263e-13	8.42555e-13	0	0	0	0	0	0	0	0	0	0	0	0	0	0	0	0	0	0	0	0	0
352.296	35	1	1	0	0	1	1	0	0	0	0	0	0	0	0	0	0	0	0	0	0	0	0	0		2.19892e-12	1.4263e-13	4.21277e-13	0	0	7.19918e-12	1.78287e-11	0	0	0	0	0	0	0	0	0	0	0	0	0	0	0	0	0
353.694	33	0	2	1	1	0	0	0	0	0	0	0	0	0	0	0	0	0	0	0	0	0	0	0		2.07326e-12	0	8.42555e-13	1.46533e-12	3.21934e-12	0	0	0	0	0	0	0	0	0	0	0	0	0	0	0	0	0	0	0
355.092	42	1	1	0	2	0	0	0	0	0	0	0	0	0	0	0	0	0	0	0	0	0	0	0		2.6387e-12	1.4263e-13	4.21277e-13	0	6.43867e-12	0	0	0	0	0	0	0	0	0	0	0	0	0	0	0	0	0	0	0
356.49	43	1	2	1	0	1	0	0	0	0	0	0	0	0	0	0	0	0	0	0	0	0	0	0		2.70153e-12	1.4263e-13	8.42555e-13	1.46533e-12	0	7.19918e-12	0	0	0	0	0	0	0	0	0	0	0	0	0	0	0	0	0	0
357.888	38	1	1	0	0	0	0	0	0	0	0	0	0	0	0	0	0	0	0	0	0	0	0	0		2.38739e-12	1.4263e-13	4.21277e-13	0	0	0	0	0	0	0	0	0	0	0	0	0	0	0	0	0	0	0	0	0
359.286	36	4	0	0	0	0	0	0	0	0	0	0	0	0	0	0	0	0	0	0	0	0	0	0		2.26174e-12	5.70519e-13	0	0	0	0	0	0	0	0	0	0	0	0	0	0	0	0	0	0	0	0	0	0
360.684	31	0	2	1	1	0	1	0	0	0	0	0	0	0	0	0	0	0	0	0	0	0	0	0		1.94761e-12	0	8.42555e-13	1.46533e-12	3.21934e-12	0	1.78287e-11	0	0	0	0	0	0	0	0	0	0	0	0	0	0	0	0	0
362.082	45	3	0	0	0	0	0	0	0	0	0	0	0	0	0	0	0	0	0	0	0	0	0	0		2.82718e-12	4.27889e-13	0	0	0	0	0	0	0	0	0	0	0	0	0	0	0	0	0	0	0	0	0	0
363.48	27	2	0	0	0	0	0	0	0	0	0	0	0	0	0	0	0	0	0	0	0	0	0	0		1.69631e-12	2.85259e-13	0	0	0	0	0	0	0	0	0	0	0	0	0	0	0	0	0	0	0	0	0	0
364.878	39	0	2	0	0	0	1	0	0	0	0	0	0	0	0	0	0	0	0	0	0	0	0	0		2.45022e-12	0	8.42555e-13	0	0	0	1.78287e-11	0	0	0	0	0	0	0	0	0	0	0	0	0	0	0	0	0
366.276	31	1	1	0	0	0	0	0	0	0	0	0	0	0	0	0	0	0	0	0	0	0	0	0		1.94761e-12	1.4263e-13	4.21277e-13	0	0	0	0	0	0	0	0	0	0	0	0	0	0	0	0	0	0	0	0	0
367.674	34	0	0	0	1	0	0	0	0	0	0	0	0	0	0	0	0	0	0	0	0	0	0	0		2.13609e-12	0	0	0	3.21934e-12	0	0	0	0	0	0	0	0	0	0	0	0	0	0	0	0	0	0	0
369.072	31	0	0	0	0	0	0	0	0	0	0	0	0	0	0	0	0	0	0	0	0	0	0	0		1.94761e-12	0	0	0	0	0	0	0	0	0	0	0	0	0	0	0	0	0	0	0	0	0	0	0
370.47	33	1	1	0	0	0	0	0	0	0	0	0	0	0	0	0	0	0	0	0	0	0	0	0		2.07326e-12	1.4263e-13	4.21277e-13	0	0	0	0	0	0	0	0	0	0	0	0	0	0	0	0	0	0	0	0	0
371.868	23	1	1	0	0	0	0	0	0	0	0	0	0	0	0	0	0	0	0	0	0	0	0	0		1.445e-12	1.4263e-13	4.21277e-13	0	0	0	0	0	0	0	0	0	0	0	0	0	0	0	0	0	0	0	0	0
373.266	32	0	2	0	1	1	0	0	0	0	0	0	0	0	0	0	0	0	0	0	0	0	0	0		2.01044e-12	0	8.42555e-13	0	3.21934e-12	7.19918e-12	0	0	0	0	0	0	0	0	0	0	0	0	0	0	0	0	0	0
374.664	35	2	2	0	1	0	0	1	0	0	0	0	0	0	0	0	0	0	0	0	0	0	0	0		2.19892e-12	2.85259e-13	8.42555e-13	0	3.21934e-12	0	0	3.9564e-11	0	0	0	0	0	0	0	0	0	0	0	0	0	0	0	0
376.062	29	4	0	0	1	2	0	0	0	0	0	0	0	0	0	0	0	0	0	0	0	0	0	0		1.82196e-12	5.70519e-13	0	0	3.21934e-12	1.43984e-11	0	0	0	0	0	0	0	0	0	0	0	0	0	0	0	0	0	0
377.46	44	4	1	0	0	0	0	0	0	0	0	0	0	0	0	0	0	0	0	0	0	0	0	0		2.76435e-12	5.70519e-13	4.21277e-13	0	0	0	0	0	0	0	0	0	0	0	0	0	0	0	0	0	0	0	0	0
378.858	28	3	0	0	1	0	0	0	0	0	0	0	0	0	0	0	0	0	0	0	0	0	0	0		1.75913e-12	4.27889e-13	0	0	3.21934e-12	0	0	0	0	0	0	0	0	0	0	0	0	0	0	0	0	0	0	0
380.256	39	2	1	0	0	0	0	0	0	0	0	0	0	0	0	0	0	0	0	0	0	0	0	0		2.45022e-12	2.85259e-13	4.21277e-13	0	0	0	0	0	0	0	0	0	0	0	0	0	0	0	0	0	0	0	0	0
381.654	27	1	0	1	0	0	0	0	0	0	0	0	0	0	0	0	0	0	0	0	0	0	0	0		1.69631e-12	1.4263e-13	0	1.46533e-12	0	0	0	0	0	0	0	0	0	0	0	0	0	0	0	0	0	0	0	0
383.052	37	1	2	0	1	1	1	0	0	0	0	0	0	0	0	0	0	0	0	0	0	0	0	0		2.32457e-12	1.4263e-13	8.42555e-13	0	3.21934e-12	7.19918e-12	1.78287e-11	0	0	0	0	0	0	0	0	0	0	0	0	0	0	0	0	0
384.45	37	5	2	0	0	0	0	0	0	0	0	0	0	0	0	0	0	0	0	0	0	0	0	0		2.32457e-12	7.13148e-13	8.42555e-13	0	0	0	0	0	0	0	0	0	0	0	0	0	0	0	0	0	0	0	0	0
385.848	41	0	1	1	0	1	0	0	0	0	0	0	0	0	0	0	0	0	0	0	0	0	0	0		2.57587e-12	0	4.21277e-13	1.46533e-12	0	7.19918e-12	0	0	0	0	0	0	0	0	0	0	0	0	0	0	0	0	0	0
387.246	24	2	0	0	0	0	0	0	0	0	0	0	0	0	0	0	0	0	0	0	0	0	0	0		1.50783e-12	2.85259e-13	0	0	0	0	0	0	0	0	0	0	0	0	0	0	0	0	0	0	0	0	0	0
388.644	41	2	1	2	0	2	0	1	0	0	0	0	0	0	0	0	0	0	0	0	0	0	0	0		2.57587e-12	2.85259e-13	4.21277e-13	2.93067e-12	0	1.43984e-11	0	3.9564e-11	0	0	0	0	0	0	0	0	0	0	0	0	0	0	0	0
390.042	32	2	3	0	0	0	0	0	0	0	0	0	0	0	0	0	0	0	0	0	0	0	0	0		2.01044e-12	2.85259e-13	1.26383e-12	0	0	0	0	0	0	0	0	0	0	0	0	0	0	0	0	0	0	0	0	0
391.44	44	3	1	1	0	0	0	0	0	0	0	0	0	0	0	0	0	0	0	0	0	0	0	0		2.76435e-12	4.27889e-13	4.21277e-13	1.46533e-12	0	0	0	0	0	0	0	0	0	0	0	0	0	0	0	0	0	0	0	0
392.838	31	0	0	0	0	0	0	0	0	0	0	0	0	0	0	0	0	0	0	0	0	0	0	0		1.94761e-12	0	0	0	0	0	0	0	0	0	0	0	0	0	0	0	0	0	0	0	0	0	0	0
394.236	35	0	0	0	1	0	0	0	0	1	0	0	0	0	0	0	0	0	0	0	0	0	0	0		2.19892e-12	0	0	0	3.21934e-12	0	0	0	0	2.06038e-10	0	0	0	0	0	0	0	0	0	0	0	0	0	0
395.634	39	0	2	0	1	0	0	0	0	0	0	0	0	0	0	0	0	0	0	0	0	0	0	0		2.45022e-12	0	8.42555e-13	0	3.21934e-12	0	0	0	0	0	0	0	0	0	0	0	0	0	0	0	0	0	0	0
397.032	31	6	1	0	0	1	0	0	0	0	0	0	0	0	0	0	0	0	0	0	0	0	0	0		1.94761e-12	8.55778e-13	4.21277e-13	0	0	7.19918e-12	0	0	0	0	0	0	0	0	0	0	0	0	0	0	0	0	0	0
398.43	24	2	0	0	0	0	0	0	0	0	0	0	0	0	0	0	0	0	0	0	0	0	0	0		1.50783e-12	2.85259e-13	0	0	0	0	0	0	0	0	0	0	0	0	0	0	0	0	0	0	0	0	0	0
399.828	38	1	0	0	0	0	0	0	0	0	0	0	0	0	0	0	0	0	0	0	0	0	0	0		2.38739e-12	1.4263e-13	0	0	0	0	0	0	0	0	0	0	0	0	0	0	0	0	0	0	0	0	0	0
401.226	34	1	0	1	1	0	0	0	1	0	0	0	0	0	0	0	0	0	0	0	0	0	0	0		2.13609e-12	1.4263e-13	0	1.46533e-12	3.21934e-12	0	0	0	9.37813e-11	0	0	0	0	0	0	0	0	0	0	0	0	0	0	0
402.624	37	0	1	0	2	0	0	0	0	0	0	0	0	0	0	0	0	0	0	0	0	0	0	0		2.32457e-12	0	4.21277e-13	0	6.43867e-12	0	0	0	0	0	0	0	0	0	0	0	0	0	0	0	0	0	0	0
404.022	44	1	1	2	0	1	0	0	0	0	0	0	0	0	0	0	0	0	0	0	0	0	0	0		2.76435e-12	1.4263e-13	4.21277e-13	2.93067e-12	0	7.19918e-12	0	0	0	0	0	0	0	0	0	0	0	0	0	0	0	0	0	0
405.42	43	2	1	0	0	0	0	0	0	0	0	0	0	0	0	0	0	0	0	0	0	0	0	0		2.70153e-12	2.85259e-13	4.21277e-13	0	0	0	0	0	0	0	0	0	0	0	0	0	0	0	0	0	0	0	0	0
406.818	35	3	1	1	0	0	0	0	0	0	0	0	0	0	0	0	0	0	0	0	0	0	0	0		2.19892e-12	4.27889e-13	4.21277e-13	1.46533e-12	0	0	0	0	0	0	0	0	0	0	0	0	0	0	0	0	0	0	0	0
408.216	39	2	0	2	1	0	0	0	0	0	0	0	0	0	0	0	0	0	0	0	0	0	0	0		2.45022e-12	2.85259e-13	0	2.93067e-12	3.21934e-12	0	0	0	0	0	0	0	0	0	0	0	0	0	0	0	0	0	0	0
409.614	41	1	1	1	2	0	0	0	0	0	0	0	0	0	0	0	0	0	0	0	0	0	0	0		2.57587e-12	1.4263e-13	4.21277e-13	1.46533e-12	6.43867e-12	0	0	0	0	0	0	0	0	0	0	0	0	0	0	0	0	0	0	0
411.012	31	2	1	0	3	1	0	0	0	0	0	0	0	0	0	0	0	0	0	0	0	0	0	0		1.94761e-12	2.85259e-13	4.21277e-13	0	9.65801e-12	7.19918e-12	0	0	0	0	0	0	0	0	0	0	0	0	0	0	0	0	0	0
412.41	30	5	0	0	0	0	0	0	0	1	0	0	0	0	0	0	0	0	0	0	0	0	0	0		1.88478e-12	7.13148e-13	0	0	0	0	0	0	0	2.06038e-10	0	0	0	0	0	0	0	0	0	0	0	0	0	0
413.808	44	4	1	1	0	0	0	0	0	0	0	0	0	0	0	0	0	0	0	0	0	0	0	0		2.76435e-12	5.70519e-13	4.21277e-13	1.46533e-12	0	0	0	0	0	0	0	0	0	0	0	0	0	0	0	0	0	0	0	0
415.206	41	7	0	0	1	0	0	0	0	0	0	0	0	0	0	0	0	0	0	0	0	0	0	0		2.57587e-12	9.98408e-13	0	0	3.21934e-12	0	0	0	0	0	0	0	0	0	0	0	0	0	0	0	0	0	0	0
416.604	34	2	0	0	1	0	0	0	0	0	0	0	0	0	0	0	0	0	0	0	0	0	0	0		2.13609e-12	2.85259e-13	0	0	3.21934e-12	0	0	0	0	0	0	0	0	0	0	0	0	0	0	0	0	0	0	0
418.002	43	3	2	0	0	0	0	0	0	0	0	0	0	0	0	0	0	0	0	0	0	0	0	0		2.70153e-12	4.27889e-13	8.42555e-13	0	0	0	0	0	0	0	0	0	0	0	0	0	0	0	0	0	0	0	0	0
419.4	32	2	0	0	1	0	0	0	0	0	0	0	0	0	0	0	0	0	0	0	0	0	0	0		2.01044e-12	2.85259e-13	0	0	3.21934e-12	0	0	0	0	0	0	0	0	0	0	0	0	0	0	0	0	0	0	0
420.798	34	6	1	1	1	0	0	0	0	0	0	0	0	0	0	0	0	0	0	0	0	0	0	0		2.13609e-12	8.55778e-13	4.21277e-13	1.46533e-12	3.21934e-12	0	0	0	0	0	0	0	0	0	0	0	0	0	0	0	0	0	0	0
422.196	30	2	1	0	0	2	0	0	0	0	0	0	0	0	0	0	0	0	0	0	0	0	0	0		1.88478e-12	2.85259e-13	4.21277e-13	0	0	1.43984e-11	0	0	0	0	0	0	0	0	0	0	0	0	0	0	0	0	0	0
423.594	45	0	1	1	0	0	0	0	0	0	0	0	0	0	0	0	0	0	0	0	0	0	0	0		2.82718e-12	0	4.21277e-13	1.46533e-12	0	0	0	0	0	0	0	0	0	0	0	0	0	0	0	0	0	0	0	0
424.992	42	2	1	0	0	0	0	0	0	0	0	0	0	0	0	0	0	0	0	0	0	0	0	0		2.6387e-12	2.85259e-13	4.21277e-13	0	0	0	0	0	0	0	0	0	0	0	0	0	0	0	0	0	0	0	0	0
426.39	27	1	0	0	0	0	0	0	0	0	0	0	0	0	0	0	0	0	0	0	0	0	0	0		1.69631e-12	1.4263e-13	0	0	0	0	0	0	0	0	0	0	0	0	0	0	0	0	0	0	0	0	0	0
427.788	31	3	2	0	1	0	0	0	0	0	0	0	0	0	0	0	0	0	0	0	0	0	0	0		1.94761e-12	4.27889e-13	8.42555e-13	0	3.21934e-12	0	0	0	0	0	0	0	0	0	0	0	0	0	0	0	0	0	0	0
429.186	19	0	0	0	0	0	0	0	0	0	0	0	0	0	0	0	0	0	0	0	0	0	0	0		1.1937e-12	0	0	0	0	0	0	0	0	0	0	0	0	0	0	0	0	0	0	0	0	0	0	0
430.584	31	0	1	0	0	1	0	0	0	0	0	0	0	0	0	0	0	0	0	0	0	0	0	0		1.94761e-12	0	4.21277e-13	0	0	7.19918e-12	0	0	0	0	0	0	0	0	0	0	0	0	0	0	0	0	0	0
431.982	36	3	2	0	2	0	0	0	0	0	0	0	0	0	0	0	0	0	0	0	0	0	0	0		2.26174e-12	4.27889e-13	8.42555e-13	0	6.43867e-12	0	0	0	0	0	0	0	0	0	0	0	0	0	0	0	0	0	0	0
433.38	31	1	0	0	0	0	0	0	0	0	0	0	0	0	0	0	0	0	0	0	0	0	0	0		1.94761e-12	1.4263e-13	0	0	0	0	0	0	0	0	0	0	0	0	0	0	0	0	0	0	0	0	0	0
434.778	44	2	0	0	1	0	0	0	0	0	0	0	0	0	0	0	0	0	0	0	0	0	0	0		2.76435e-12	2.85259e-13	0	0	3.21934e-12	0	0	0	0	0	0	0	0	0	0	0	0	0	0	0	0	0	0	0
436.176	22	2	1	0	0	1	0	0	0	0	0	0	0	0	0	0	0	0	0	0	0	0	0	0		1.38218e-12	2.85259e-13	4.21277e-13	0	0	7.19918e-12	0	0	0	0	0	0	0	0	0	0	0	0	0	0	0	0	0	0
437.574	39	0	2	1	1	0	1	0	0	0	0	0	0	0	0	0	0	0	0	0	0	0	0	0		2.45022e-12	0	8.42555e-13	1.46533e-12	3.21934e-12	0	1.78287e-11	0	0	0	0	0	0	0	0	0	0	0	0	0	0	0	0	0
438.972	35	2	0	0	0	0	0	0	0	0	0	0	0	0	0	0	0	0	0	0	0	0	0	0		2.19892e-12	2.85259e-13	0	0	0	0	0	0	0	0	0	0	0	0	0	0	0	0	0	0	0	0	0	0
440.37	47	0	1	0	0	0	0	0	0	0	0	0	0	0	0	0	0	0	0	0	0	0	0	0		2.95283e-12	0	4.21277e-13	0	0	0	0	0	0	0	0	0	0	0	0	0	0	0	0	0	0	0	0	0
441.768	21	1	2	0	0	0	0	0	0	0	0	0	0	0	0	0	0	0	0	0	0	0	0	0		1.31935e-12	1.4263e-13	8.42555e-13	0	0	0	0	0	0	0	0	0	0	0	0	0	0	0	0	0	0	0	0	0
443.166	31	2	1	1	1	1	0	2	0	0	0	0	0	0	0	0	0	0	0	0	0	0	0	0		1.94761e-12	2.85259e-13	4.21277e-13	1.46533e-12	3.21934e-12	7.19918e-12	0	7.9128e-11	0	0	0	0	0	0	0	0	0	0	0	0	0	0	0	0
444.564	53	2	2	0	0	0	0	0	0	0	0	0	0	0	0	0	0	0	0	0	0	0	0	0		3.32979e-12	2.85259e-13	8.42555e-13	0	0	0	0	0	0	0	0	0	0	0	0	0	0	0	0	0	0	0	0	0
445.962	48	2	0	0	1	0	0	0	0	0	0	0	0	0	0	0	0	0	0	0	0	0	0	0		3.01566e-12	2.85259e-13	0	0	3.21934e-12	0	0	0	0	0	0	0	0	0	0	0	0	0	0	0	0	0	0	0
447.36	30	2	0	0	0	0	0	0	0	0	0	0	0	0	0	0	0	0	0	0	0	0	0	0		1.88478e-12	2.85259e-13	0	0	0	0	0	0	0	0	0	0	0	0	0	0	0	0	0	0	0	0	0	0
448.758	26	1	1	1	0	1	0	0	0	0	0	0	0	0	0	0	0	0	0	0	0	0	0	0		1.63348e-12	1.4263e-13	4.21277e-13	1.46533e-12	0	7.19918e-12	0	0	0	0	0	0	0	0	0	0	0	0	0	0	0	0	0	0
450.156	28	4	1	0	0	0	0	0	0	0	0	0	0	0	0	0	0	0	0	0	0	0	0	0		1.75913e-12	5.70519e-13	4.21277e-13	0	0	0	0	0	0	0	0	0	0	0	0	0	0	0	0	0	0	0	0	0
451.554	37	1	1	0	0	1	0	0	0	0	0	0	0	0	0	0	0	0	0	0	0	0	0	0		2.32457e-12	1.4263e-13	4.21277e-13	0	0	7.19918e-12	0	0	0	0	0	0	0	0	0	0	0	0	0	0	0	0	0	0
452.952	38	1	0	1	0	0	0	0	0	0	0	0	0	0	0	0	0	0	0	0	0	0	0	0		2.38739e-12	1.4263e-13	0	1.46533e-12	0	0	0	0	0	0	0	0	0	0	0	0	0	0	0	0	0	0	0	0
454.35	31	1	1	0	0	0	0	0	0	0	0	0	0	0	0	0	0	0	0	0	0	0	0	0		1.94761e-12	1.4263e-13	4.21277e-13	0	0	0	0	0	0	0	0	0	0	0	0	0	0	0	0	0	0	0	0	0
455.748	23	1	1	0	0	0	0	0	0	0	0	0	0	0	0	0	0	0	0	0	0	0	0	0		1.445e-12	1.4263e-13	4.21277e-13	0	0	0	0	0	0	0	0	0	0	0	0	0	0	0	0	0	0	0	0	0
457.146	39	3	1	0	1	0	0	0	0	0	0	0	0	0	0	0	0	0	0	0	0	0	0	0		2.45022e-12	4.27889e-13	4.21277e-13	0	3.21934e-12	0	0	0	0	0	0	0	0	0	0	0	0	0	0	0	0	0	0	0
458.544	36	2	2	0	0	0	1	0	0	0	0	0	0	0	0	0	0	0	0	0	0	0	0	0		2.26174e-12	2.85259e-13	8.42555e-13	0	0	0	1.78287e-11	0	0	0	0	0	0	0	0	0	0	0	0	0	0	0	0	0
459.942	39	2	0	1	0	2	0	0	0	0	0	0	0	0	0	0	0	0	0	0	0	0	0	0		2.45022e-12	2.85259e-13	0	1.46533e-12	0	1.43984e-11	0	0	0	0	0	0	0	0	0	0	0	0	0	0	0	0	0	0
461.34	32	3	1	0	0	0	0	0	0	0	0	0	0	0	0	0	0	0	0	0	0	0	0	0		2.01044e-12	4.27889e-13	4.21277e-13	0	0	0	0	0	0	0	0	0	0	0	0	0	0	0	0	0	0	0	0	0
462.738	40	4	0	0	0	0	0	0	0	0	0	0	0	0	0	0	0	0	0	0	0	0	0	0		2.51305e-12	5.70519e-13	0	0	0	0	0	0	0	0	0	0	0	0	0	0	0	0	0	0	0	0	0	0
464.136	39	0	0	1	2	0	1	0	0	0	0	0	0	0	0	0	0	0	0	0	0	0	0	0		2.45022e-12	0	0	1.46533e-12	6.43867e-12	0	1.78287e-11	0	0	0	0	0	0	0	0	0	0	0	0	0	0	0	0	0
465.534	40	4	0	0	0	1	0	0	0	0	0	0	0	0	0	0	0	0	0	0	0	0	0	0		2.51305e-12	5.70519e-13	0	0	0	7.19918e-12	0	0	0	0	0	0	0	0	0	0	0	0	0	0	0	0	0	0
466.932	36	2	1	0	1	0	0	0	0	0	0	0	0	0	0	0	0	0	0	0	0	0	0	0		2.26174e-12	2.85259e-13	4.21277e-13	0	3.21934e-12	0	0	0	0	0	0	0	0	0	0	0	0	0	0	0	0	0	0	0
468.33	41	4	0	0	1	0	0	0	0	0	0	0	0	0	0	0	0	0	0	0	0	0	0	0		2.57587e-12	5.70519e-13	0	0	3.21934e-12	0	0	0	0	0	0	0	0	0	0	0	0	0	0	0	0	0	0	0
469.728	43	1	0	1	0	1	0	0	1	0	0	0	0	0	0	0	0	0	0	0	0	0	0	0		2.70153e-12	1.4263e-13	0	1.46533e-12	0	7.19918e-12	0	0	9.37813e-11	0	0	0	0	0	0	0	0	0	0	0	0	0	0	0
471.126	39	4	0	0	1	3	0	0	0	0	0	0	0	0	0	0	0	0	0	0	0	0	0	0		2.45022e-12	5.70519e-13	0	0	3.21934e-12	2.15975e-11	0	0	0	0	0	0	0	0	0	0	0	0	0	0	0	0	0	0
472.524	38	2	2	1	0	0	0	0	0	0	0	0	0	0	0	0	0	0	0	0	0	0	0	0		2.38739e-12	2.85259e-13	8.42555e-13	1.46533e-12	0	0	0	0	0	0	0	0	0	0	0	0	0	0	0	0	0	0	0	0
473.922	32	3	0	2	0	0	1	0	0	0	0	0	0	0	0	0	0	0	0	0	0	0	0	0		2.01044e-12	4.27889e-13	0	2.93067e-12	0	0	1.78287e-11	0	0	0	0	0	0	0	0	0	0	0	0	0	0	0	0	0
475.32	37	3	0	0	0	0	0	0	0	0	0	0	0	0	0	0	0	0	0	0	0	0	0	0		2.32457e-12	4.27889e-13	0	0	0	0	0	0	0	0	0	0	0	0	0	0	0	0	0	0	0	0	0	0
476.718	36	1	1	0	0	0	0	0	0	0	0	0	0	0	0	0	0	0	0	0	0	0	0	0		2.26174e-12	1.4263e-13	4.21277e-13	0	0	0	0	0	0	0	0	0	0	0	0	0	0	0	0	0	0	0	0	0
478.116	21	3	3	0	0	0	0	0	0	0	0	0	0	0	0	0	0	0	0	0	0	0	0	0		1.31935e-12	4.27889e-13	1.26383e-12	0	0	0	0	0	0	0	0	0	0	0	0	0	0	0	0	0	0	0	0	0
479.514	28	2	1	1	0	1	1	0	0	0	0	0	0	0	0	0	0	0	0	0	0	0	0	0		1.75913e-12	2.85259e-13	4.21277e-13	1.46533e-12	0	7.19918e-12	1.78287e-11	0	0	0	0	0	0	0	0	0	0	0	0	0	0	0	0	0
480.912	30	0	1	0	0	0	0	0	0	0	0	0	0	0	0	0	0	0	0	0	0	0	0	0		1.88478e-12	0	4.21277e-13	0	0	0	0	0	0	0	0	0	0	0	0	0	0	0	0	0	0	0	0	0
482.31	24	1	1	0	0	0	0	0	0	0	0	0	0	0	0	0	0	0	0	0	0	0	0	0		1.50783e-12	1.4263e-13	4.21277e-13	0	0	0	0	0	0	0	0	0	0	0	0	0	0	0	0	0	0	0	0	0
483.708	20	4	0	0	1	0	0	0	0	0	0	0	0	0	0	0	0	0	0	0	0	0	0	0		1.25652e-12	5.70519e-13	0	0	3.21934e-12	0	0	0	0	0	0	0	0	0	0	0	0	0	0	0	0	0	0	0
485.106	17	0	0	1	0	0	1	0	0	0	0	0	0	0	0	0	0	0	0	0	0	0	0	0		1.06804e-12	0	0	1.46533e-12	0	0	1.78287e-11	0	0	0	0	0	0	0	0	0	0	0	0	0	0	0	0	0
486.504	12	1	0	0	0	0	0	0	0	0	0	0	0	0	0	0	0	0	0	0	0	0	0	0		7.53914e-13	1.4263e-13	0	0	0	0	0	0	0	0	0	0	0	0	0	0	0	0	0	0	0	0	0	0
487.902	17	1	2	0	0	0	0	0	0	0	0	0	0	0	0	0	0	0	0	0	0	0	0	0		1.06804e-12	1.4263e-13	8.42555e-13	0	0	0	0	0	0	0	0	0	0	0	0	0	0	0	0	0	0	0	0	0
489.3	6	0	0	0	1	0	0	0	0	0	0	0	0	0	0	0	0	0	0	0	0	0	0	0		3.76957e-13	0	0	0	3.21934e-12	0	0	0	0	0	0	0	0	0	0	0	0	0	0	0	0	0	0	0
490.698	20	0	0	0	0	0	0	0	0	0	0	0	0	0	0	0	0	0	0	0	0	0	0	0		1.25652e-12	0	0	0	0	0	0	0	0	0	0	0	0	0	0	0	0	0	0	0	0	0	0	0
492.096	18	0	0	0	1	0	0	0	0	0	0	0	0	0	0	0	0	0	0	0	0	0	0	0		1.13087e-12	0	0	0	3.21934e-12	0	0	0	0	0	0	0	0	0	0	0	0	0	0	0	0	0	0	0
493.494	20	0	1	0	0	0	0	0	0	0	0	0	0	0	0	0	0	0	0	0	0	0	0	0		1.25652e-12	0	4.21277e-13	0	0	0	0	0	0	0	0	0	0	0	0	0	0	0	0	0	0	0	0	0
494.892	27	1	0	0	0	0	0	0	0	0	0	0	0	0	0	0	0	0	0	0	0	0	0	0		1.69631e-12	1.4263e-13	0	0	0	0	0	0	0	0	0	0	0	0	0	0	0	0	0	0	0	0	0	0
496.29	22	2	1	0	0	0	0	0	0	0	0	0	0	0	0	0	0	0	0	0	0	0	0	0		1.38218e-12	2.85259e-13	4.21277e-13	0	0	0	0	0	0	0	0	0	0	0	0	0	0	0	0	0	0	0	0	0
497.688	23	2	1	0	0	0	0	0	0	0	0	0	0	0	0	0	0	0	0	0	0	0	0	0		1.445e-12	2.85259e-13	4.21277e-13	0	0	0	0	0	0	0	0	0	0	0	0	0	0	0	0	0	0	0	0	0
499.086	21	3	0	0	0	0	0	0	0	0	0	0	0	0	0	0	0	0	0	0	0	0	0	0		1.31935e-12	4.27889e-13	0	0	0	0	0	0	0	0	0	0	0	0	0	0	0	0	0	0	0	0	0	0
500.484	27	2	1	0	0	0	0	0	0	0	0	0	0	0	0	0	0	0	0	0	0	0	0	0		1.69631e-12	2.85259e-13	4.21277e-13	0	0	0	0	0	0	0	0	0	0	0	0	0	0	0	0	0	0	0	0	0
501.882	22	0	1	0	1	0	0	0	0	0	0	0	0	0	0	0	0	0	0	0	0	0	0	0		1.38218e-12	0	4.21277e-13	0	3.21934e-12	0	0	0	0	0	0	0	0	0	0	0	0	0	0	0	0	0	0	0
503.28	20	4	1	0	1	0	0	0	0	0	0	0	0	0	0	0	0	0	0	0	0	0	0	0		1.25652e-12	5.70519e-13	4.21277e-13	0	3.21934e-12	0	0	0	0	0	0	0	0	0	0	0	0	0	0	0	0	0	0	0
504.678	22	1	0	0	0	0	0	0	0	0	0	0	0	0	0	0	0	0	0	0	0	0	0	0		1.38218e-12	1.4263e-13	0	0	0	0	0	0	0	0	0	0	0	0	0	0	0	0	0	0	0	0	0	0
506.076	27	0	1	0	1	0	0	0	0	0	0	0	0	0	0	0	0	0	0	0	0	0	0	0		1.69631e-12	0	4.21277e-13	0	3.21934e-12	0	0	0	0	0	0	0	0	0	0	0	0	0	0	0	0	0	0	0
507.474	21	0	0	0	0	0	0	0	0	0	0	0	0	0	0	0	0	0	0	0	0	0	0	0		1.31935e-12	0	0	0	0	0	0	0	0	0	0	0	0	0	0	0	0	0	0	0	0	0	0	0
508.872	15	2	0	0	0	0	0	0	0	0	0	0	0	0	0	0	0	0	0	0	0	0	0	0		9.42392e-13	2.85259e-13	0	0	0	0	0	0	0	0	0	0	0	0	0	0	0	0	0	0	0	0	0	0
510.27	15	4	2	0	0	0	0	0	0	0	0	0	0	0	0	0	0	0	0	0	0	0	0	0		9.42392e-13	5.70519e-13	8.42555e-13	0	0	0	0	0	0	0	0	0	0	0	0	0	0	0	0	0	0	0	0	0
511.668	10	0	1	0	0	0	0	0	0	0	0	0	0	0	0	0	0	0	0	0	0	0	0	0		6.28262e-13	0	4.21277e-13	0	0	0	0	0	0	0	0	0	0	0	0	0	0	0	0	0	0	0	0	0
513.066	14	1	0	0	0	0	0	0	0	0	0	0	0	0	0	0	0	0	0	0	0	0	0	0		8.79566e-13	1.4263e-13	0	0	0	0	0	0	0	0	0	0	0	0	0	0	0	0	0	0	0	0	0	0
514.464	6	1	0	0	0	0	0	0	0	0	0	0	0	0	0	0	0	0	0	0	0	0	0	0		3.76957e-13	1.4263e-13	0	0	0	0	0	0	0	0	0	0	0	0	0	0	0	0	0	0	0	0	0	0
515.862	3	0	0	0	1	0	0	0	0	0	0	0	0	0	0	0	0	0	0	0	0	0	0	0		1.88478e-13	0	0	0	3.21934e-12	0	0	0	0	0	0	0	0	0	0	0	0	0	0	0	0	0	0	0
517.26	7	0	0	0	0	0	0	0	0	0	0	0	0	0	0	0	0	0	0	0	0	0	0	0		4.39783e-13	0	0	0	0	0	0	0	0	0	0	0	0	0	0	0	0	0	0	0	0	0	0	0
518.658	3	0	0	0	0	0	0	0	0	0	0	0	0	0	0	0	0	0	0	0	0	0	0	0		1.88478e-13	0	0	0	0	0	0	0	0	0	0	0	0	0	0	0	0	0	0	0	0	0	0	0
520.056	7	1	0	0	0	1	0	0	0	0	0	0	0	0	0	0	0	0	0	0	0	0	0	0		4.39783e-13	1.4263e-13	0	0	0	7.19918e-12	0	0	0	0	0	0	0	0	0	0	0	0	0	0	0	0	0	0
521.454	10	0	0	0	1	0	0	0	0	0	0	0	0	0	0	0	0	0	0	0	0	0	0	0		6.28262e-13	0	0	0	3.21934e-12	0	0	0	0	0	0	0	0	0	0	0	0	0	0	0	0	0	0	0
522.852	9	0	0	0	0	0	0	0	0	0	0	0	0	0	0	0	0	0	0	0	0	0	0	0		5.65435e-13	0	0	0	0	0	0	0	0	0	0	0	0	0	0	0	0	0	0	0	0	0	0	0
524.25	6	0	0	0	0	0	0	0	0	0	0	0	0	0	0	0	0	0	0	0	0	0	0	0		3.76957e-13	0	0	0	0	0	0	0	0	0	0	0	0	0	0	0	0	0	0	0	0	0	0	0
525.648	8	2	0	0	0	0	0	0	0	0	0	0	0	0	0	0	0	0	0	0	0	0	0	0		5.02609e-13	2.85259e-13	0	0	0	0	0	0	0	0	0	0	0	0	0	0	0	0	0	0	0	0	0	0
527.046	9	1	0	0	0	0	0	0	0	0	0	0	0	0	0	0	0	0	0	0	0	0	0	0		5.65435e-13	1.4263e-13	0	0	0	0	0	0	0	0	0	0	0	0	0	0	0	0	0	0	0	0	0	0
528.444	18	0	0	0	0	0	0	0	0	0	0	0	0	0	0	0	0	0	0	0	0	0	0	0		1.13087e-12	0	0	0	0	0	0	0	0	0	0	0	0	0	0	0	0	0	0	0	0	0	0	0
529.842	11	0	0	0	1	0	0	0	0	0	0	0	0	0	0	0	0	0	0	0	0	0	0	0		6.91088e-13	0	0	0	3.21934e-12	0	0	0	0	0	0	0	0	0	0	0	0	0	0	0	0	0	0	0
531.24	13	0	1	1	0	0	0	0	0	0	0	0	0	0	0	0	0	0	0	0	0	0	0	0		8.1674e-13	0	4.21277e-13	1.46533e-12	0	0	0	0	0	0	0	0	0	0	0	0	0	0	0	0	0	0	0	0
532.638	21	0	1	0	1	0	0	0	0	0	0	0	0	0	0	0	0	0	0	0	0	0	0	0		1.31935e-12	0	4.21277e-13	0	3.21934e-12	0	0	0	0	0	0	0	0	0	0	0	0	0	0	0	0	0	0	0
534.036	18	0	0	0	0	0	0	0	0	0	0	0	0	0	0	0	0	0	0	0	0	0	0	0		1.13087e-12	0	0	0	0	0	0	0	0	0	0	0	0	0	0	0	0	0	0	0	0	0	0	0
535.434	11	1	0	0	1	0	0	0	0	0	0	0	0	0	0	0	0	0	0	0	0	0	0	0		6.91088e-13	1.4263e-13	0	0	3.21934e-12	0	0	0	0	0	0	0	0	0	0	0	0	0	0	0	0	0	0	0
536.832	17	1	0	0	0	0	0	0	0	0	0	0	0	0	0	0	0	0	0	0	0	0	0	0		1.06804e-12	1.4263e-13	0	0	0	0	0	0	0	0	0	0	0	0	0	0	0	0	0	0	0	0	0	0
538.23	6	1	0	0	0	0	0	0	0	0	0	0	0	0	0	0	0	0	0	0	0	0	0	0		3.76957e-13	1.4263e-13	0	0	0	0	0	0	0	0	0	0	0	0	0	0	0	0	0	0	0	0	0	0
539.628	27	1	0	0	0	0	0	0	0	0	0	0	0	0	0	0	0	0	0	0	0	0	0	0		1.69631e-12	1.4263e-13	0	0	0	0	0	0	0	0	0	0	0	0	0	0	0	0	0	0	0	0	0	0
541.026	19	0	0	0	0	0	0	0	0	0	0	0	0	0	0	0	0	0	0	0	0	0	0	0		1.1937e-12	0	0	0	0	0	0	0	0	0	0	0	0	0	0	0	0	0	0	0	0	0	0	0
542.424	15	0	1	1	0	0	0	1	0	0	0	0	0	0	0	0	0	0	0	0	0	0	0	0		9.42392e-13	0	4.21277e-13	1.46533e-12	0	0	0	3.9564e-11	0	0	0	0	0	0	0	0	0	0	0	0	0	0	0	0
543.822	18	0	0	0	0	0	1	0	0	0	0	0	0	0	0	0	0	0	0	0	0	0	0	0		1.13087e-12	0	0	0	0	0	1.78287e-11	0	0	0	0	0	0	0	0	0	0	0	0	0	0	0	0	0
545.22	12	0	0	1	0	0	0	0	0	0	0	0	0	0	0	0	0	0	0	0	0	0	0	0		7.53914e-13	0	0	1.46533e-12	0	0	0	0	0	0	0	0	0	0	0	0	0	0	0	0	0	0	0	0
546.618	22	3	1	0	0	0	0	0	0	0	0	0	0	0	0	0	0	0	0	0	0	0	0	0		1.38218e-12	4.27889e-13	4.21277e-13	0	0	0	0	0	0	0	0	0	0	0	0	0	0	0	0	0	0	0	0	0
548.016	21	2	1	0	1	1	0	0	0	0	0	0	0	0	0	0	0	0	0	0	0	0	0	0		1.31935e-12	2.85259e-13	4.21277e-13	0	3.21934e-12	7.19918e-12	0	0	0	0	0	0	0	0	0	0	0	0	0	0	0	0	0	0
549.414	27	3	1	0	0	0	0	0	0	0	0	0	0	0	0	0	0	0	0	0	0	0	0	0		1.69631e-12	4.27889e-13	4.21277e-13	0	0	0	0	0	0	0	0	0	0	0	0	0	0	0	0	0	0	0	0	0
550.812	15	0	0	0	0	0	0	0	0	0	0	0	0	0	0	0	0	0	0	0	0	0	0	0		9.42392e-13	0	0	0	0	0	0	0	0	0	0	0	0	0	0	0	0	0	0	0	0	0	0	0
552.21	21	1	0	0	0	1	1	0	0	0	0	0	0	0	0	0	0	0	0	0	0	0	0	0		1.31935e-12	1.4263e-13	0	0	0	7.19918e-12	1.78287e-11	0	0	0	0	0	0	0	0	0	0	0	0	0	0	0	0	0
553.608	18	1	0	0	0	0	0	0	0	0	0	0	0	0	0	0	0	0	0	0	0	0	0	0		1.13087e-12	1.4263e-13	0	0	0	0	0	0	0	0	0	0	0	0	0	0	0	0	0	0	0	0	0	0
555.006	25	1	0	0	1	0	1	0	0	0	0	0	0	0	0	0	0	0	0	0	0	0	0	0		1.57065e-12	1.4263e-13	0	0	3.21934e-12	0	1.78287e-11	0	0	0	0	0	0	0	0	0	0	0	0	0	0	0	0	0
556.404	17	0	0	0	0	0	0	0	0	0	0	0	0	0	0	0	0	0	0	0	0	0	0	0		1.06804e-12	0	0	0	0	0	0	0	0	0	0	0	0	0	0	0	0	0	0	0	0	0	0	0
557.802	8	1	0	0	1	0	0	0	0	0	0	0	0	0	0	0	0	0	0	0	0	0	0	0		5.02609e-13	1.4263e-13	0	0	3.21934e-12	0	0	0	0	0	0	0	0	0	0	0	0	0	0	0	0	0	0	0
559.2	4	1	0	0	0	0	0	0	0	0	0	0	0	0	0	0	0	0	0	0	0	0	0	0		2.51305e-13	1.4263e-13	0	0	0	0	0	0	0	0	0	0	0	0	0	0	0	0	0	0	0	0	0	0
560.598	6	0	0	0	0	0	0	0	0	0	0	0	0	0	0	0	0	0	0	0	0	0	0	0		3.76957e-13	0	0	0	0	0	0	0	0	0	0	0	0	0	0	0	0	0	0	0	0	0	0	0
561.996	7	0	0	0	1	0	0	0	0	0	0	0	0	0	0	0	0	0	0	0	0	0	0	0		4.39783e-13	0	0	0	3.21934e-12	0	0	0	0	0	0	0	0	0	0	0	0	0	0	0	0	0	0	0
563.394	9	0	0	0	0	0	0	0	0	0	0	0	0	0	0	0	0	0	0	0	0	0	0	0		5.65435e-13	0	0	0	0	0	0	0	0	0	0	0	0	0	0	0	0	0	0	0	0	0	0	0
564.792	16	3	0	0	1	0	0	0	0	0	0	0	0	0	0	0	0	0	0	0	0	0	0	0		1.00522e-12	4.27889e-13	0	0	3.21934e-12	0	0	0	0	0	0	0	0	0	0	0	0	0	0	0	0	0	0	0
566.19	11	0	1	0	0	0	0	0	0	0	0	0	0	0	0	0	0	0	0	0	0	0	0	0		6.91088e-13	0	4.21277e-13	0	0	0	0	0	0	0	0	0	0	0	0	0	0	0	0	0	0	0	0	0
567.588	4	0	1	0	0	0	0	0	0	0	0	0	0	0	0	0	0	0	0	0	0	0	0	0		2.51305e-13	0	4.21277e-13	0	0	0	0	0	0	0	0	0	0	0	0	0	0	0	0	0	0	0	0	0
568.986	21	0	2	0	0	0	0	0	0	0	0	0	0	0	0	0	0	0	0	0	0	0	0	0		1.31935e-12	0	8.42555e-13	0	0	0	0	0	0	0	0	0	0	0	0	0	0	0	0	0	0	0	0	0
570.384	8	1	0	0	0	0	0	0	0	0	0	0	0	0	0	0	0	0	0	0	0	0	0	0		5.02609e-13	1.4263e-13	0	0	0	0	0	0	0	0	0	0	0	0	0	0	0	0	0	0	0	0	0	0
571.782	6	1	0	0	0	0	0	0	0	0	0	0	0	0	0	0	0	0	0	0	0	0	0	0		3.76957e-13	1.4263e-13	0	0	0	0	0	0	0	0	0	0	0	0	0	0	0	0	0	0	0	0	0	0
573.18	11	0	0	0	0	0	0	0	0	0	0	0	0	0	0	0	0	0	0	0	0	0	0	0		6.91088e-13	0	0	0	0	0	0	0	0	0	0	0	0	0	0	0	0	0	0	0	0	0	0	0
574.578	11	2	0	0	0	0	0	0	0	0	0	0	0	0	0	0	0	0	0	0	0	0	0	0		6.91088e-13	2.85259e-13	0	0	0	0	0	0	0	0	0	0	0	0	0	0	0	0	0	0	0	0	0	0
575.976	13	1	0	0	0	0	0	1	0	0	0	0	0	0	0	0	0	0	0	0	0	0	0	0		8.1674e-13	1.4263e-13	0	0	0	0	0	3.9564e-11	0	0	0	0	0	0	0	0	0	0	0	0	0	0	0	0
577.374	22	1	0	0	0	1	0	0	0	0	0	0	0	0	0	0	0	0	0	0	0	0	0	0		1.38218e-12	1.4263e-13	0	0	0	7.19918e-12	0	0	0	0	0	0	0	0	0	0	0	0	0	0	0	0	0	0
578.772	17	2	0	0	0	0	0	0	0	0	0	0	0	0	0	0	0	0	0	0	0	0	0	0		1.06804e-12	2.85259e-13	0	0	0	0	0	0	0	0	0	0	0	0	0	0	0	0	0	0	0	0	0	0
580.17	24	0	0	1	0	0	0	0	0	0	0	0	0	0	0	0	0	0	0	0	0	0	0	0		1.50783e-12	0	0	1.46533e-12	0	0	0	0	0	0	0	0	0	0	0	0	0	0	0	0	0	0	0	0
581.568	19	1	1	0	0	1	1	0	0	0	0	0	0	0	0	0	0	0	0	0	0	0	0	0		1.1937e-12	1.4263e-13	4.21277e-13	0	0	7.19918e-12	1.78287e-11	0	0	0	0	0	0	0	0	0	0	0	0	0	0	0	0	0
582.966	40	2	1	0	0	0	0	0	0	0	0	0	0	0	0	0	0	0	0	0	0	0	0	0		2.51305e-12	2.85259e-13	4.21277e-13	0	0	0	0	0	0	0	0	0	0	0	0	0	0	0	0	0	0	0	0	0
584.364	39	1	1	0	0	1	1	0	0	0	0	0	0	0	0	0	0	0	0	0	0	0	0	0		2.45022e-12	1.4263e-13	4.21277e-13	0	0	7.19918e-12	1.78287e-11	0	0	0	0	0	0	0	0	0	0	0	0	0	0	0	0	0
585.762	33	0	1	0	1	0	0	0	0	0	0	0	0	0	0	0	0	0	0	0	0	0	0	0		2.07326e-12	0	4.21277e-13	0	3.21934e-12	0	0	0	0	0	0	0	0	0	0	0	0	0	0	0	0	0	0	0
587.16	48	3	0	0	0	0	1	0	0	0	0	0	0	0	0	0	0	0	0	0	0	0	0	0		3.01566e-12	4.27889e-13	0	0	0	0	1.78287e-11	0	0	0	0	0	0	0	0	0	0	0	0	0	0	0	0	0
588.558	30	1	1	0	0	0	0	1	0	0	0	0	0	0	0	0	0	0	0	0	0	0	0	0		1.88478e-12	1.4263e-13	4.21277e-13	0	0	0	0	3.9564e-11	0	0	0	0	0	0	0	0	0	0	0	0	0	0	0	0
589.956	12	2	1	0	1	0	0	0	0	0	0	0	0	0	0	0	0	0	0	0	0	0	0	0		7.53914e-13	2.85259e-13	4.21277e-13	0	3.21934e-12	0	0	0	0	0	0	0	0	0	0	0	0	0	0	0	0	0	0	0
591.354	22	0	0	0	0	0	0	0	0	0	0	0	0	0	0	0	0	0	0	0	0	0	0	0		1.38218e-12	0	0	0	0	0	0	0	0	0	0	0	0	0	0	0	0	0	0	0	0	0	0	0
592.752	17	1	1	0	0	1	0	0	0	0	0	0	0	0	0	0	0	0	0	0	0	0	0	0		1.06804e-12	1.4263e-13	4.21277e-13	0	0	7.19918e-12	0	0	0	0	0	0	0	0	0	0	0	0	0	0	0	0	0	0
594.15	19	0	0	0	0	0	0	0	0	0	0	0	0	0	0	0	0	0	0	0	0	0	0	0		1.1937e-12	0	0	0	0	0	0	0	0	0	0	0	0	0	0	0	0	0	0	0	0	0	0	0
595.548	30	1	0	1	0	0	1	0	0	0	0	0	0	0	0	0	0	0	0	0	0	0	0	0		1.88478e-12	1.4263e-13	0	1.46533e-12	0	0	1.78287e-11	0	0	0	0	0	0	0	0	0	0	0	0	0	0	0	0	0
596.946	14	1	1	0	0	0	0	0	0	0	0	0	0	0	0	0	0	0	0	0	0	0	0	0		8.79566e-13	1.4263e-13	4.21277e-13	0	0	0	0	0	0	0	0	0	0	0	0	0	0	0	0	0	0	0	0	0
598.344	38	4	0	0	1	0	0	0	0	0	0	0	0	0	0	0	0	0	0	0	0	0	0	0		2.38739e-12	5.70519e-13	0	0	3.21934e-12	0	0	0	0	0	0	0	0	0	0	0	0	0	0	0	0	0	0	0
599.742	19	1	1	0	0	0	0	0	0	0	0	0	0	0	0	0	0	0	0	0	0	0	0	0		1.1937e-12	1.4263e-13	4.21277e-13	0	0	0	0	0	0	0	0	0	0	0	0	0	0	0	0	0	0	0	0	0
601.14	21	1	0	0	0	1	1	0	0	0	0	0	0	0	0	0	0	0	0	0	0	0	0	0		1.31935e-12	1.4263e-13	0	0	0	7.19918e-12	1.78287e-11	0	0	0	0	0	0	0	0	0	0	0	0	0	0	0	0	0
602.538	44	0	0	0	1	0	0	0	1	0	0	0	0	0	0	0	0	0	0	0	0	0	0	0		2.76435e-12	0	0	0	3.21934e-12	0	0	0	9.37813e-11	0	0	0	0	0	0	0	0	0	0	0	0	0	0	0
603.936	28	1	1	0	0	1	0	0	0	0	0	0	0	0	0	0	0	0	0	0	0	0	0	0		1.75913e-12	1.4263e-13	4.21277e-13	0	0	7.19918e-12	0	0	0	0	0	0	0	0	0	0	0	0	0	0	0	0	0	0
605.334	33	1	1	0	2	0	0	0	0	0	0	0	0	0	0	0	0	0	0	0	0	0	0	0		2.07326e-12	1.4263e-13	4.21277e-13	0	6.43867e-12	0	0	0	0	0	0	0	0	0	0	0	0	0	0	0	0	0	0	0
606.732	19	1	1	0	0	0	0	0	0	0	0	0	0	0	0	0	0	0	0	0	0	0	0	0		1.1937e-12	1.4263e-13	4.21277e-13	0	0	0	0	0	0	0	0	0	0	0	0	0	0	0	0	0	0	0	0	0
608.13	23	1	0	1	0	1	1	0	0	0	0	0	0	0	0	0	0	0	0	0	0	0	0	0		1.445e-12	1.4263e-13	0	1.46533e-12	0	7.19918e-12	1.78287e-11	0	0	0	0	0	0	0	0	0	0	0	0	0	0	0	0	0
609.528	26	2	0	1	0	0	0	0	0	0	0	0	0	0	0	0	0	0	0	0	0	0	0	0		1.63348e-12	2.85259e-13	0	1.46533e-12	0	0	0	0	0	0	0	0	0	0	0	0	0	0	0	0	0	0	0	0
610.926	27	1	0	0	0	1	0	0	0	0	0	0	0	0	0	0	0	0	0	0	0	0	0	0		1.69631e-12	1.4263e-13	0	0	0	7.19918e-12	0	0	0	0	0	0	0	0	0	0	0	0	0	0	0	0	0	0
612.324	23	1	0	1	0	0	0	0	0	0	0	0	0	0	0	0	0	0	0	0	0	0	0	0		1.445e-12	1.4263e-13	0	1.46533e-12	0	0	0	0	0	0	0	0	0	0	0	0	0	0	0	0	0	0	0	0
613.722	38	2	0	1	1	0	0	0	0	0	0	0	0	0	0	0	0	0	0	0	0	0	0	0		2.38739e-12	2.85259e-13	0	1.46533e-12	3.21934e-12	0	0	0	0	0	0	0	0	0	0	0	0	0	0	0	0	0	0	0
615.12	34	5	0	0	0	1	0	0	0	0	0	0	0	0	0	0	0	0	0	0	0	0	0	0		2.13609e-12	7.13148e-13	0	0	0	7.19918e-12	0	0	0	0	0	0	0	0	0	0	0	0	0	0	0	0	0	0
616.518	24	5	0	1	2	1	0	0	0	0	0	0	0	0	0	0	0	0	0	0	0	0	0	0		1.50783e-12	7.13148e-13	0	1.46533e-12	6.43867e-12	7.19918e-12	0	0	0	0	0	0	0	0	0	0	0	0	0	0	0	0	0	0
617.916	20	1	0	0	0	0	1	0	0	0	0	0	0	0	0	0	0	0	0	0	0	0	0	0		1.25652e-12	1.4263e-13	0	0	0	0	1.78287e-11	0	0	0	0	0	0	0	0	0	0	0	0	0	0	0	0	0
619.314	35	0	1	0	0	0	0	0	0	0	0	0	0	0	0	0	0	0	0	0	0	0	0	0		2.19892e-12	0	4.21277e-13	0	0	0	0	0	0	0	0	0	0	0	0	0	0	0	0	0	0	0	0	0
620.712	33	1	2	0	1	1	0	0	0	0	0	0	0	0	0	0	0	0	0	0	0	0	0	0		2.07326e-12	1.4263e-13	8.42555e-13	0	3.21934e-12	7.19918e-12	0	0	0	0	0	0	0	0	0	0	0	0	0	0	0	0	0	0
622.11	20	6	1	0	0	1	0	0	0	0	0	0	0	0	0	0	0	0	0	0	0	0	0	0		1.25652e-12	8.55778e-13	4.21277e-13	0	0	7.19918e-12	0	0	0	0	0	0	0	0	0	0	0	0	0	0	0	0	0	0
623.508	31	1	2	0	0	0	0	0	0	0	0	0	0	0	0	0	0	0	0	0	0	0	0	0		1.94761e-12	1.4263e-13	8.42555e-13	0	0	0	0	0	0	0	0	0	0	0	0	0	0	0	0	0	0	0	0	0
624.906	34	5	1	0	0	0	0	0	0	0	0	0	0	0	0	0	0	0	0	0	0	0	0	0		2.13609e-12	7.13148e-13	4.21277e-13	0	0	0	0	0	0	0	0	0	0	0	0	0	0	0	0	0	0	0	0	0
626.304	35	1	0	1	0	0	0	0	0	0	0	0	0	0	0	0	0	0	0	0	0	0	0	0		2.19892e-12	1.4263e-13	0	1.46533e-12	0	0	0	0	0	0	0	0	0	0	0	0	0	0	0	0	0	0	0	0
627.702	31	2	0	0	0	1	2	0	0	0	0	0	0	0	0	0	0	0	0	0	0	0	0	0		1.94761e-12	2.85259e-13	0	0	0	7.19918e-12	3.56574e-11	0	0	0	0	0	0	0	0	0	0	0	0	0	0	0	0	0
629.1	45	0	0	1	0	1	0	0	0	0	0	0	0	0	0	0	0	0	0	0	0	0	0	0		2.82718e-12	0	0	1.46533e-12	0	7.19918e-12	0	0	0	0	0	0	0	0	0	0	0	0	0	0	0	0	0	0
630.498	49	0	0	0	0	0	0	0	0	0	0	0	0	0	0	0	0	0	0	0	0	0	0	0		3.07848e-12	0	0	0	0	0	0	0	0	0	0	0	0	0	0	0	0	0	0	0	0	0	0	0
631.896	35	3	0	0	1	0	1	0	0	0	0	0	0	0	0	0	0	0	0	0	0	0	0	0		2.19892e-12	4.27889e-13	0	0	3.21934e-12	0	1.78287e-11	0	0	0	0	0	0	0	0	0	0	0	0	0	0	0	0	0
633.294	38	0	0	0	0	1	0	0	0	0	0	0	0	0	0	0	0	0	0	0	0	0	0	0		2.38739e-12	0	0	0	0	7.19918e-12	0	0	0	0	0	0	0	0	0	0	0	0	0	0	0	0	0	0
634.692	48	3	1	0	2	0	0	0	0	0	0	0	0	0	0	0	0	0	0	0	0	0	0	0		3.01566e-12	4.27889e-13	4.21277e-13	0	6.43867e-12	0	0	0	0	0	0	0	0	0	0	0	0	0	0	0	0	0	0	0
636.09	41	2	1	1	1	0	0	0	0	0	0	0	0	0	0	0	0	0	0	0	0	0	0	0		2.57587e-12	2.85259e-13	4.21277e-13	1.46533e-12	3.21934e-12	0	0	0	0	0	0	0	0	0	0	0	0	0	0	0	0	0	0	0
637.488	40	7	0	0	0	0	0	0	0	0	0	0	0	0	0	0	0	0	0	0	0	0	0	0		2.51305e-12	9.98408e-13	0	0	0	0	0	0	0	0	0	0	0	0	0	0	0	0	0	0	0	0	0	0
638.886	29	3	0	1	0	0	0	0	0	0	0	0	0	0	0	0	0	0	0	0	0	0	0	0		1.82196e-12	4.27889e-13	0	1.46533e-12	0	0	0	0	0	0	0	0	0	0	0	0	0	0	0	0	0	0	0	0
640.284	34	0	1	0	1	0	1	0	0	0	0	0	0	0	0	0	0	0	0	0	0	0	0	0		2.13609e-12	0	4.21277e-13	0	3.21934e-12	0	1.78287e-11	0	0	0	0	0	0	0	0	0	0	0	0	0	0	0	0	0
641.682	29	3	1	0	0	0	0	0	0	0	0	0	0	0	0	0	0	0	0	0	0	0	0	0		1.82196e-12	4.27889e-13	4.21277e-13	0	0	0	0	0	0	0	0	0	0	0	0	0	0	0	0	0	0	0	0	0
643.08	43	2	0	1	1	0	0	0	0	0	0	0	0	0	0	0	0	0	0	0	0	0	0	0		2.70153e-12	2.85259e-13	0	1.46533e-12	3.21934e-12	0	0	0	0	0	0	0	0	0	0	0	0	0	0	0	0	0	0	0
644.478	22	1	4	0	0	0	0	0	0	0	0	0	0	0	0	0	0	0	0	0	0	0	0	0		1.38218e-12	1.4263e-13	1.68511e-12	0	0	0	0	0	0	0	0	0	0	0	0	0	0	0	0	0	0	0	0	0
645.876	37	2	0	0	1	1	0	0	0	0	0	0	0	0	0	0	0	0	0	0	0	0	0	0		2.32457e-12	2.85259e-13	0	0	3.21934e-12	7.19918e-12	0	0	0	0	0	0	0	0	0	0	0	0	0	0	0	0	0	0
647.274	25	1	0	0	0	0	0	0	0	0	0	0	0	0	0	0	0	0	0	0	0	0	0	0		1.57065e-12	1.4263e-13	0	0	0	0	0	0	0	0	0	0	0	0	0	0	0	0	0	0	0	0	0	0
648.672	26	0	2	1	1	0	0	0	0	1	0	0	0	0	0	0	0	0	0	0	0	0	0	0		1.63348e-12	0	8.42555e-13	1.46533e-12	3.21934e-12	0	0	0	0	2.06038e-10	0	0	0	0	0	0	0	0	0	0	0	0	0	0
650.07	29	2	0	1	0	0	0	0	0	0	0	0	0	0	0	0	0	0	0	0	0	0	0	0		1.82196e-12	2.85259e-13	0	1.46533e-12	0	0	0	0	0	0	0	0	0	0	0	0	0	0	0	0	0	0	0	0
651.468	25	2	0	1	0	1	0	0	0	0	0	0	0	0	0	0	0	0	0	0	0	0	0	0		1.57065e-12	2.85259e-13	0	1.46533e-12	0	7.19918e-12	0	0	0	0	0	0	0	0	0	0	0	0	0	0	0	0	0	0
652.866	41	2	0	0	0	0	0	0	0	0	0	0	0	0	0	0	0	0	0	0	0	0	0	0		2.57587e-12	2.85259e-13	0	0	0	0	0	0	0	0	0	0	0	0	0	0	0	0	0	0	0	0	0	0
654.264	26	1	2	0	0	0	0	0	0	0	0	0	0	0	0	0	0	0	0	0	0	0	0	0		1.63348e-12	1.4263e-13	8.42555e-13	0	0	0	0	0	0	0	0	0	0	0	0	0	0	0	0	0	0	0	0	0
655.662	28	3	0	1	0	2	0	0	0	0	0	0	0	0	0	0	0	0	0	0	0	0	0	0		1.75913e-12	4.27889e-13	0	1.46533e-12	0	1.43984e-11	0	0	0	0	0	0	0	0	0	0	0	0	0	0	0	0	0	0
657.06	39	1	2	0	0	0	1	0	0	0	0	0	0	0	0	0	0	0	0	0	0	0	0	0		2.45022e-12	1.4263e-13	8.42555e-13	0	0	0	1.78287e-11	0	0	0	0	0	0	0	0	0	0	0	0	0	0	0	0	0
658.458	40	2	3	0	0	0	0	0	0	0	0	0	0	0	0	0	0	0	0	0	0	0	0	0		2.51305e-12	2.85259e-13	1.26383e-12	0	0	0	0	0	0	0	0	0	0	0	0	0	0	0	0	0	0	0	0	0
659.856	32	1	1	1	0	0	0	0	0	0	0	0	0	0	0	0	0	0	0	0	0	0	0	0		2.01044e-12	1.4263e-13	4.21277e-13	1.46533e-12	0	0	0	0	0	0	0	0	0	0	0	0	0	0	0	0	0	0	0	0
661.254	51	2	0	0	1	0	1	0	0	0	0	0	0	0	0	0	0	0	0	0	0	0	0	0		3.20413e-12	2.85259e-13	0	0	3.21934e-12	0	1.78287e-11	0	0	0	0	0	0	0	0	0	0	0	0	0	0	0	0	0
662.652	34	2	2	0	1	0	0	0	0	0	0	0	0	0	0	0	0	0	0	0	0	0	0	0		2.13609e-12	2.85259e-13	8.42555e-13	0	3.21934e-12	0	0	0	0	0	0	0	0	0	0	0	0	0	0	0	0	0	0	0
664.05	34	2	0	0	0	0	0	0	0	0	0	0	0	0	0	0	0	0	0	0	0	0	0	0		2.13609e-12	2.85259e-13	0	0	0	0	0	0	0	0	0	0	0	0	0	0	0	0	0	0	0	0	0	0
665.448	34	2	0	0	2	0	1	0	0	0	0	0	0	0	0	0	0	0	0	0	0	0	0	0		2.13609e-12	2.85259e-13	0	0	6.43867e-12	0	1.78287e-11	0	0	0	0	0	0	0	0	0	0	0	0	0	0	0	0	0
666.846	39	4	1	0	0	1	0	0	0	0	0	0	0	0	0	0	0	0	0	0	0	0	0	0		2.45022e-12	5.70519e-13	4.21277e-13	0	0	7.19918e-12	0	0	0	0	0	0	0	0	0	0	0	0	0	0	0	0	0	0
668.244	36	2	1	0	0	0	0	0	0	0	0	0	0	0	0	0	0	0	0	0	0	0	0	0		2.26174e-12	2.85259e-13	4.21277e-13	0	0	0	0	0	0	0	0	0	0	0	0	0	0	0	0	0	0	0	0	0
669.642	36	1	1	2	1	0	0	0	0	0	0	0	0	0	0	0	0	0	0	0	0	0	0	0		2.26174e-12	1.4263e-13	4.21277e-13	2.93067e-12	3.21934e-12	0	0	0	0	0	0	0	0	0	0	0	0	0	0	0	0	0	0	0
671.04	31	2	0	0	1	0	0	0	0	0	0	0	0	0	0	0	0	0	0	0	0	0	0	0		1.94761e-12	2.85259e-13	0	0	3.21934e-12	0	0	0	0	0	0	0	0	0	0	0	0	0	0	0	0	0	0	0
672.438	37	3	1	1	2	0	1	0	0	0	0	0	0	0	0	0	0	0	0	0	0	0	0	0		2.32457e-12	4.27889e-13	4.21277e-13	1.46533e-12	6.43867e-12	0	1.78287e-11	0	0	0	0	0	0	0	0	0	0	0	0	0	0	0	0	0
673.836	32	2	1	1	0	0	1	0	0	0	0	0	0	0	0	0	0	0	0	0	0	0	0	0		2.01044e-12	2.85259e-13	4.21277e-13	1.46533e-12	0	0	1.78287e-11	0	0	0	0	0	0	0	0	0	0	0	0	0	0	0	0	0
675.234	38	1	1	0	1	0	0	0	0	0	0	0	0	0	0	0	0	0	0	0	0	0	0	0		2.38739e-12	1.4263e-13	4.21277e-13	0	3.21934e-12	0	0	0	0	0	0	0	0	0	0	0	0	0	0	0	0	0	0	0
676.632	44	1	0	0	0	0	0	0	0	0	0	0	0	0	0	0	0	0	0	0	0	0	0	0		2.76435e-12	1.4263e-13	0	0	0	0	0	0	0	0	0	0	0	0	0	0	0	0	0	0	0	0	0	0
678.03	37	2	2	1	1	0	1	0	0	0	0	0	0	0	0	0	0	0	0	0	0	0	0	0		2.32457e-12	2.85259e-13	8.42555e-13	1.46533e-12	3.21934e-12	0	1.78287e-11	0	0	0	0	0	0	0	0	0	0	0	0	0	0	0	0	0
679.428	36	4	0	0	0	0	0	0	0	0	0	0	0	0	0	0	0	0	0	0	0	0	0	0		2.26174e-12	5.70519e-13	0	0	0	0	0	0	0	0	0	0	0	0	0	0	0	0	0	0	0	0	0	0
680.826	37	1	0	1	0	1	0	0	0	0	0	0	0	0	0	0	0	0	0	0	0	0	0	0		2.32457e-12	1.4263e-13	0	1.46533e-12	0	7.19918e-12	0	0	0	0	0	0	0	0	0	0	0	0	0	0	0	0	0	0
682.224	38	4	1	0	0	0	1	0	0	0	0	0	0	0	0	0	0	0	0	0	0	0	0	0		2.38739e-12	5.70519e-13	4.21277e-13	0	0	0	1.78287e-11	0	0	0	0	0	0	0	0	0	0	0	0	0	0	0	0	0
683.622	39	0	1	0	1	0	0	0	0	0	0	0	0	0	0	0	0	0	0	0	0	0	0	0		2.45022e-12	0	4.21277e-13	0	3.21934e-12	0	0	0	0	0	0	0	0	0	0	0	0	0	0	0	0	0	0	0
685.02	37	2	0	0	1	0	0	0	0	0	0	0	0	0	0	0	0	0	0	0	0	0	0	0		2.32457e-12	2.85259e-13	0	0	3.21934e-12	0	0	0	0	0	0	0	0	0	0	0	0	0	0	0	0	0	0	0
686.418	37	2	1	0	2	0	0	0	0	0	0	0	0	0	0	0	0	0	0	0	0	0	0	0		2.32457e-12	2.85259e-13	4.21277e-13	0	6.43867e-12	0	0	0	0	0	0	0	0	0	0	0	0	0	0	0	0	0	0	0
687.816	29	6	2	0	1	0	0	0	0	0	0	0	0	0	0	0	0	0	0	0	0	0	0	0		1.82196e-12	8.55778e-13	8.42555e-13	0	3.21934e-12	0	0	0	0	0	0	0	0	0	0	0	0	0	0	0	0	0	0	0
689.214	30	1	0	1	0	0	0	0	0	0	0	0	0	0	0	0	0	0	0	0	0	0	0	0		1.88478e-12	1.4263e-13	0	1.46533e-12	0	0	0	0	0	0	0	0	0	0	0	0	0	0	0	0	0	0	0	0
690.612	35	1	0	0	0	0	0	0	0	0	0	0	0	0	0	0	0	0	0	0	0	0	0	0		2.19892e-12	1.4263e-13	0	0	0	0	0	0	0	0	0	0	0	0	0	0	0	0	0	0	0	0	0	0
692.01	35	1	1	2	0	1	0	0	0	0	0	0	0	0	0	0	0	0	0	0	0	0	0	0		2.19892e-12	1.4263e-13	4.21277e-13	2.93067e-12	0	7.19918e-12	0	0	0	0	0	0	0	0	0	0	0	0	0	0	0	0	0	0
693.408	33	4	0	0	0	0	0	0	0	0	0	0	0	0	0	0	0	0	0	0	0	0	0	0		2.07326e-12	5.70519e-13	0	0	0	0	0	0	0	0	0	0	0	0	0	0	0	0	0	0	0	0	0	0
694.806	33	1	1	0	1	0	0	0	0	0	0	0	0	0	0	0	0	0	0	0	0	0	0	0		2.07326e-12	1.4263e-13	4.21277e-13	0	3.21934e-12	0	0	0	0	0	0	0	0	0	0	0	0	0	0	0	0	0	0	0
696.204	47	2	0	0	0	0	0	0	0	0	0	0	0	0	0	0	0	0	0	0	0	0	0	0		2.95283e-12	2.85259e-13	0	0	0	0	0	0	0	0	0	0	0	0	0	0	0	0	0	0	0	0	0	0
697.602	31	2	0	0	0	0	0	0	1	0	0	0	0	0	0	0	0	0	0	0	0	0	0	0		1.94761e-12	2.85259e-13	0	0	0	0	0	0	9.37813e-11	0	0	0	0	0	0	0	0	0	0	0	0	0	0	0
699	38	0	0	1	1	1	0	0	0	0	0	0	0	0	0	0	0	0	0	0	0	0	0	0		2.38739e-12	0	0	1.46533e-12	3.21934e-12	7.19918e-12	0	0	0	0	0	0	0	0	0	0	0	0	0	0	0	0	0	0
700.398	47	2	0	0	0	0	0	0	0	0	0	0	0	0	0	0	0	0	0	0	0	0	0	0		2.95283e-12	2.85259e-13	0	0	0	0	0	0	0	0	0	0	0	0	0	0	0	0	0	0	0	0	0	0
701.796	40	5	1	0	0	1	0	1	0	0	0	0	0	0	0	0	0	0	0	0	0	0	0	0		2.51305e-12	7.13148e-13	4.21277e-13	0	0	7.19918e-12	0	3.9564e-11	0	0	0	0	0	0	0	0	0	0	0	0	0	0	0	0
703.194	44	4	1	0	0	1	0	0	0	0	0	0	0	0	0	0	0	0	0	0	0	0	0	0		2.76435e-12	5.70519e-13	4.21277e-13	0	0	7.19918e-12	0	0	0	0	0	0	0	0	0	0	0	0	0	0	0	0	0	0
704.592	50	4	1	0	1	1	0	0	0	1	0	0	0	0	0	0	0	0	0	0	0	0	0	0		3.14131e-12	5.70519e-13	4.21277e-13	0	3.21934e-12	7.19918e-12	0	0	0	2.06038e-10	0	0	0	0	0	0	0	0	0	0	0	0	0	0
705.99	48	0	0	1	0	0	1	0	0	0	0	0	0	0	0	0	0	0	0	0	0	0	0	0		3.01566e-12	0	0	1.46533e-12	0	0	1.78287e-11	0	0	0	0	0	0	0	0	0	0	0	0	0	0	0	0	0
707.388	46	2	3	0	1	0	0	0	0	0	0	0	0	0	0	0	0	0	0	0	0	0	0	0		2.89e-12	2.85259e-13	1.26383e-12	0	3.21934e-12	0	0	0	0	0	0	0	0	0	0	0	0	0	0	0	0	0	0	0
708.786	46	2	0	0	0	0	0	0	0	0	0	0	0	0	0	0	0	0	0	0	0	0	0	0		2.89e-12	2.85259e-13	0	0	0	0	0	0	0	0	0	0	0	0	0	0	0	0	0	0	0	0	0	0
710.184	47	1	1	0	0	0	0	1	0	0	0	0	0	0	0	0	0	0	0	0	0	0	0	0		2.95283e-12	1.4263e-13	4.21277e-13	0	0	0	0	3.9564e-11	0	0	0	0	0	0	0	0	0	0	0	0	0	0	0	0
711.582	48	2	1	1	0	1	0	0	0	0	0	0	0	0	0	0	0	0	0	0	0	0	0	0		3.01566e-12	2.85259e-13	4.21277e-13	1.46533e-12	0	7.19918e-12	0	0	0	0	0	0	0	0	0	0	0	0	0	0	0	0	0	0
712.98	31	0	1	0	0	1	0	0	0	0	0	0	0	0	0	0	0	0	0	0	0	0	0	0		1.94761e-12	0	4.21277e-13	0	0	7.19918e-12	0	0	0	0	0	0	0	0	0	0	0	0	0	0	0	0	0	0
714.378	45	1	1	0	1	1	0	0	0	0	0	0	0	0	0	0	0	0	0	0	0	0	0	0		2.82718e-12	1.4263e-13	4.21277e-13	0	3.21934e-12	7.19918e-12	0	0	0	0	0	0	0	0	0	0	0	0	0	0	0	0	0	0
715.776	29	1	3	0	0	0	0	0	0	0	0	0	0	0	0	0	0	0	0	0	0	0	0	0		1.82196e-12	1.4263e-13	1.26383e-12	0	0	0	0	0	0	0	0	0	0	0	0	0	0	0	0	0	0	0	0	0
717.174	31	2	1	1	0	0	0	0	0	0	0	0	0	0	0	0	0	0	0	0	0	0	0	0		1.94761e-12	2.85259e-13	4.21277e-13	1.46533e-12	0	0	0	0	0	0	0	0	0	0	0	0	0	0	0	0	0	0	0	0
718.572	53	3	0	0	0	0	0	0	0	0	0	0	0	0	0	0	0	0	0	0	0	0	0	0		3.32979e-12	4.27889e-13	0	0	0	0	0	0	0	0	0	0	0	0	0	0	0	0	0	0	0	0	0	0
719.97	54	0	0	0	0	0	0	0	0	0	0	0	0	0	0	0	0	0	0	0	0	0	0	0		3.39261e-12	0	0	0	0	0	0	0	0	0	0	0	0	0	0	0	0	0	0	0	0	0	0	0
721.368	43	2	1	0	0	0	0	1	0	0	0	0	0	0	0	0	0	0	0	0	0	0	0	0		2.70153e-12	2.85259e-13	4.21277e-13	0	0	0	0	3.9564e-11	0	0	0	0	0	0	0	0	0	0	0	0	0	0	0	0
722.766	28	2	0	1	0	0	1	0	0	0	0	0	0	0	0	0	0	0	0	0	0	0	0	0		1.75913e-12	2.85259e-13	0	1.46533e-12	0	0	1.78287e-11	0	0	0	0	0	0	0	0	0	0	0	0	0	0	0	0	0
724.164	50	2	0	0	0	0	1	0	0	0	0	0	0	0	0	0	0	0	0	0	0	0	0	0		3.14131e-12	2.85259e-13	0	0	0	0	1.78287e-11	0	0	0	0	0	0	0	0	0	0	0	0	0	0	0	0	0
725.562	45	1	0	0	2	0	0	0	0	0	0	0	0	0	0	0	0	0	0	0	0	0	0	0		2.82718e-12	1.4263e-13	0	0	6.43867e-12	0	0	0	0	0	0	0	0	0	0	0	0	0	0	0	0	0	0	0
726.96	48	3	0	0	1	1	1	0	0	0	0	0	0	0	0	0	0	0	0	0	0	0	0	0		3.01566e-12	4.27889e-13	0	0	3.21934e-12	7.19918e-12	1.78287e-11	0	0	0	0	0	0	0	0	0	0	0	0	0	0	0	0	0
728.358	37	1	2	0	0	0	1	0	0	0	0	0	0	0	0	0	0	0	0	0	0	0	0	0		2.32457e-12	1.4263e-13	8.42555e-13	0	0	0	1.78287e-11	0	0	0	0	0	0	0	0	0	0	0	0	0	0	0	0	0
729.756	44	3	2	0	1	1	1	0	0	0	0	0	0	0	0	0	0	0	0	0	0	0	0	0		2.76435e-12	4.27889e-13	8.42555e-13	0	3.21934e-12	7.19918e-12	1.78287e-11	0	0	0	0	0	0	0	0	0	0	0	0	0	0	0	0	0
731.154	58	1	0	0	3	1	0	0	0	0	0	0	0	0	0	0	0	0	0	0	0	0	0	0		3.64392e-12	1.4263e-13	0	0	9.65801e-12	7.19918e-12	0	0	0	0	0	0	0	0	0	0	0	0	0	0	0	0	0	0
732.552	55	3	0	0	0	0	0	0	0	0	0	0	0	0	0	0	0	0	0	0	0	0	0	0		3.45544e-12	4.27889e-13	0	0	0	0	0	0	0	0	0	0	0	0	0	0	0	0	0	0	0	0	0	0
733.95	46	1	1	0	1	0	0	0	0	0	0	0	0	0	0	0	0	0	0	0	0	0	0	0		2.89e-12	1.4263e-13	4.21277e-13	0	3.21934e-12	0	0	0	0	0	0	0	0	0	0	0	0	0	0	0	0	0	0	0
735.348	46	5	0	0	0	0	0	1	0	0	0	0	0	0	0	0	0	0	0	0	0	0	0	0		2.89e-12	7.13148e-13	0	0	0	0	0	3.9564e-11	0	0	0	0	0	0	0	0	0	0	0	0	0	0	0	0
736.746	52	1	2	0	0	0	0	0	0	0	0	0	0	0	0	0	0	0	0	0	0	0	0	0		3.26696e-12	1.4263e-13	8.42555e-13	0	0	0	0	0	0	0	0	0	0	0	0	0	0	0	0	0	0	0	0	0
738.144	62	4	1	0	1	0	0	0	0	0	0	0	0	0	0	0	0	0	0	0	0	0	0	0		3.89522e-12	5.70519e-13	4.21277e-13	0	3.21934e-12	0	0	0	0	0	0	0	0	0	0	0	0	0	0	0	0	0	0	0
739.542	44	1	1	0	0	0	0	0	0	0	0	0	0	0	0	0	0	0	0	0	0	0	0	0		2.76435e-12	1.4263e-13	4.21277e-13	0	0	0	0	0	0	0	0	0	0	0	0	0	0	0	0	0	0	0	0	0
740.94	47	2	2	0	0	1	2	0	0	0	0	0	0	0	0	0	0	0	0	0	0	0	0	0		2.95283e-12	2.85259e-13	8.42555e-13	0	0	7.19918e-12	3.56574e-11	0	0	0	0	0	0	0	0	0	0	0	0	0	0	0	0	0
742.338	34	1	3	0	1	0	0	0	0	0	0	0	0	0	0	0	0	0	0	0	0	0	0	0		2.13609e-12	1.4263e-13	1.26383e-12	0	3.21934e-12	0	0	0	0	0	0	0	0	0	0	0	0	0	0	0	0	0	0	0
743.736	45	4	2	1	3	0	0	0	0	0	0	0	0	0	0	0	0	0	0	0	0	0	0	0		2.82718e-12	5.70519e-13	8.42555e-13	1.46533e-12	9.65801e-12	0	0	0	0	0	0	0	0	0	0	0	0	0	0	0	0	0	0	0
745.134	48	3	0	0	0	2	0	1	0	0	0	0	0	0	0	0	0	0	0	0	0	0	0	0		3.01566e-12	4.27889e-13	0	0	0	1.43984e-11	0	3.9564e-11	0	0	0	0	0	0	0	0	0	0	0	0	0	0	0	0
746.532	40	2	1	0	0	0	0	0	0	0	0	0	0	0	0	0	0	0	0	0	0	0	0	0		2.51305e-12	2.85259e-13	4.21277e-13	0	0	0	0	0	0	0	0	0	0	0	0	0	0	0	0	0	0	0	0	0
747.93	47	3	0	0	1	0	0	1	0	0	0	0	0	0	0	0	0	0	0	0	0	0	0	0		2.95283e-12	4.27889e-13	0	0	3.21934e-12	0	0	3.9564e-11	0	0	0	0	0	0	0	0	0	0	0	0	0	0	0	0
749.328	45	4	1	0	0	1	0	0	0	0	0	0	0	0	0	0	0	0	0	0	0	0	0	0		2.82718e-12	5.70519e-13	4.21277e-13	0	0	7.19918e-12	0	0	0	0	0	0	0	0	0	0	0	0	0	0	0	0	0	0
750.726	46	2	0	0	0	0	0	0	0	0	0	0	0	0	0	0	0	0	0	0	0	0	0	0		2.89e-12	2.85259e-13	0	0	0	0	0	0	0	0	0	0	0	0	0	0	0	0	0	0	0	0	0	0
752.124	43	6	0	0	1	1	0	0	0	0	0	0	0	0	0	0	0	0	0	0	0	0	0	0		2.70153e-12	8.55778e-13	0	0	3.21934e-12	7.19918e-12	0	0	0	0	0	0	0	0	0	0	0	0	0	0	0	0	0	0
753.522	40	5	1	1	1	0	1	0	0	0	0	0	0	0	0	0	0	0	0	0	0	0	0	0		2.51305e-12	7.13148e-13	4.21277e-13	1.46533e-12	3.21934e-12	0	1.78287e-11	0	0	0	0	0	0	0	0	0	0	0	0	0	0	0	0	0
754.92	53	3	3	1	1	1	1	0	0	0	0	0	0	0	0	0	0	0	0	0	0	0	0	0		3.32979e-12	4.27889e-13	1.26383e-12	1.46533e-12	3.21934e-12	7.19918e-12	1.78287e-11	0	0	0	0	0	0	0	0	0	0	0	0	0	0	0	0	0
756.318	51	1	2	1	0	0	0	0	0	0	0	0	0	0	0	0	0	0	0	0	0	0	0	0		3.20413e-12	1.4263e-13	8.42555e-13	1.46533e-12	0	0	0	0	0	0	0	0	0	0	0	0	0	0	0	0	0	0	0	0
757.716	48	2	3	2	0	0	2	1	0	0	0	0	0	0	0	0	0	0	0	0	0	0	0	0		3.01566e-12	2.85259e-13	1.26383e-12	2.93067e-12	0	0	3.56574e-11	3.9564e-11	0	0	0	0	0	0	0	0	0	0	0	0	0	0	0	0
759.114	48	1	2	0	1	0	0	0	1	0	0	0	0	0	0	0	0	0	0	0	0	0	0	0		3.01566e-12	1.4263e-13	8.42555e-13	0	3.21934e-12	0	0	0	9.37813e-11	0	0	0	0	0	0	0	0	0	0	0	0	0	0	0
760.512	35	2	1	0	0	0	0	0	1	0	0	0	0	0	0	0	0	0	0	0	0	0	0	0		2.19892e-12	2.85259e-13	4.21277e-13	0	0	0	0	0	9.37813e-11	0	0	0	0	0	0	0	0	0	0	0	0	0	0	0
761.91	39	2	1	0	0	0	0	0	0	0	0	0	0	0	0	0	0	0	0	0	0	0	0	0		2.45022e-12	2.85259e-13	4.21277e-13	0	0	0	0	0	0	0	0	0	0	0	0	0	0	0	0	0	0	0	0	0
763.308	45	5	2	0	1	0	0	0	0	0	0	0	0	0	0	0	0	0	0	0	0	0	0	0		2.82718e-12	7.13148e-13	8.42555e-13	0	3.21934e-12	0	0	0	0	0	0	0	0	0	0	0	0	0	0	0	0	0	0	0
764.706	49	4	0	0	1	0	0	0	1	0	0	0	0	0	0	0	0	0	0	0	0	0	0	0		3.07848e-12	5.70519e-13	0	0	3.21934e-12	0	0	0	9.37813e-11	0	0	0	0	0	0	0	0	0	0	0	0	0	0	0
766.104	52	5	1	0	2	1	1	0	0	0	0	0	0	0	0	0	0	0	0	0	0	0	0	0		3.26696e-12	7.13148e-13	4.21277e-13	0	6.43867e-12	7.19918e-12	1.78287e-11	0	0	0	0	0	0	0	0	0	0	0	0	0	0	0	0	0
767.502	56	5	0	1	0	0	0	0	0	0	0	0	0	0	0	0	0	0	0	0	0	0	0	0		3.51827e-12	7.13148e-13	0	1.46533e-12	0	0	0	0	0	0	0	0	0	0	0	0	0	0	0	0	0	0	0	0
768.9	35	4	1	1	1	0	1	0	0	0	0	0	0	0	0	0	0	0	0	0	0	0	0	0		2.19892e-12	5.70519e-13	4.21277e-13	1.46533e-12	3.21934e-12	0	1.78287e-11	0	0	0	0	0	0	0	0	0	0	0	0	0	0	0	0	0
770.298	55	1	0	0	2	0	0	0	0	0	0	0	0	0	0	0	0	0	0	0	0	0	0	0		3.45544e-12	1.4263e-13	0	0	6.43867e-12	0	0	0	0	0	0	0	0	0	0	0	0	0	0	0	0	0	0	0
771.696	48	1	0	0	1	0	1	0	0	0	0	0	0	0	0	0	0	0	0	0	0	0	0	0		3.01566e-12	1.4263e-13	0	0	3.21934e-12	0	1.78287e-11	0	0	0	0	0	0	0	0	0	0	0	0	0	0	0	0	0
773.094	53	2	1	0	0	0	0	0	0	0	0	0	0	0	0	0	0	0	0	0	0	0	0	0		3.32979e-12	2.85259e-13	4.21277e-13	0	0	0	0	0	0	0	0	0	0	0	0	0	0	0	0	0	0	0	0	0
774.492	42	4	0	1	0	0	0	0	1	0	0	0	0	0	0	0	0	0	0	0	0	0	0	0		2.6387e-12	5.70519e-13	0	1.46533e-12	0	0	0	0	9.37813e-11	0	0	0	0	0	0	0	0	0	0	0	0	0	0	0
775.89	45	5	2	0	0	0	0	1	0	0	0	0	0	0	0	0	0	0	0	0	0	0	0	0		2.82718e-12	7.13148e-13	8.42555e-13	0	0	0	0	3.9564e-11	0	0	0	0	0	0	0	0	0	0	0	0	0	0	0	0
777.288	38	1	2	1	1	0	0	0	0	0	0	0	0	0	0	0	0	0	0	0	0	0	0	0		2.38739e-12	1.4263e-13	8.42555e-13	1.46533e-12	3.21934e-12	0	0	0	0	0	0	0	0	0	0	0	0	0	0	0	0	0	0	0
778.686	47	5	1	1	0	0	0	0	0	0	0	0	0	0	0	0	0	0	0	0	0	0	0	0		2.95283e-12	7.13148e-13	4.21277e-13	1.46533e-12	0	0	0	0	0	0	0	0	0	0	0	0	0	0	0	0	0	0	0	0
780.084	47	2	2	0	1	0	0	0	0	0	0	0	0	0	0	0	0	0	0	0	0	0	0	0		2.95283e-12	2.85259e-13	8.42555e-13	0	3.21934e-12	0	0	0	0	0	0	0	0	0	0	0	0	0	0	0	0	0	0	0
781.482	44	1	1	1	2	1	0	0	1	0	1	0	0	0	0	0	0	0	0	0	0	0	0	0		2.76435e-12	1.4263e-13	4.21277e-13	1.46533e-12	6.43867e-12	7.19918e-12	0	0	9.37813e-11	0	4.02417e-10	0	0	0	0	0	0	0	0	0	0	0	0	0
782.88	50	2	0	0	1	0	0	1	0	0	0	0	0	0	0	0	0	0	0	0	0	0	0	0		3.14131e-12	2.85259e-13	0	0	3.21934e-12	0	0	3.9564e-11	0	0	0	0	0	0	0	0	0	0	0	0	0	0	0	0
784.278	57	2	2	0	0	0	0	0	0	0	0	0	0	0	0	0	0	0	0	0	0	0	0	0		3.58109e-12	2.85259e-13	8.42555e-13	0	0	0	0	0	0	0	0	0	0	0	0	0	0	0	0	0	0	0	0	0
785.676	47	2	1	0	1	1	1	0	0	0	0	0	0	0	0	0	0	0	0	0	0	0	0	0		2.95283e-12	2.85259e-13	4.21277e-13	0	3.21934e-12	7.19918e-12	1.78287e-11	0	0	0	0	0	0	0	0	0	0	0	0	0	0	0	0	0
787.074	54	6	0	0	0	0	0	0	0	0	0	0	0	0	0	0	0	0	0	0	0	0	0	0		3.39261e-12	8.55778e-13	0	0	0	0	0	0	0	0	0	0	0	0	0	0	0	0	0	0	0	0	0	0
788.472	45	4	4	0	2	0	0	0	0	0	0	0	0	0	0	0	0	0	0	0	0	0	0	0		2.82718e-12	5.70519e-13	1.68511e-12	0	6.43867e-12	0	0	0	0	0	0	0	0	0	0	0	0	0	0	0	0	0	0	0
789.87	54	0	2	0	0	0	0	0	0	0	0	0	0	0	0	0	0	0	0	0	0	0	0	0		3.39261e-12	0	8.42555e-13	0	0	0	0	0	0	0	0	0	0	0	0	0	0	0	0	0	0	0	0	0
791.268	43	2	1	1	1	0	0	0	0	0	0	0	0	0	0	0	0	0	0	0	0	0	0	0		2.70153e-12	2.85259e-13	4.21277e-13	1.46533e-12	3.21934e-12	0	0	0	0	0	0	0	0	0	0	0	0	0	0	0	0	0	0	0
792.666	46	3	3	1	0	0	0	0	0	0	0	0	0	0	0	0	0	0	0	0	0	0	0	0		2.89e-12	4.27889e-13	1.26383e-12	1.46533e-12	0	0	0	0	0	0	0	0	0	0	0	0	0	0	0	0	0	0	0	0
794.064	41	1	0	0	0	0	0	0	0	0	0	0	0	0	0	0	0	0	0	0	0	0	0	0		2.57587e-12	1.4263e-13	0	0	0	0	0	0	0	0	0	0	0	0	0	0	0	0	0	0	0	0	0	0
795.462	46	1	0	1	1	0	0	0	0	0	0	0	0	0	0	0	0	0	0	0	0	0	0	0		2.89e-12	1.4263e-13	0	1.46533e-12	3.21934e-12	0	0	0	0	0	0	0	0	0	0	0	0	0	0	0	0	0	0	0
796.86	42	2	0	0	0	1	0	0	0	0	0	0	0	0	0	0	0	0	0	0	0	0	0	0		2.6387e-12	2.85259e-13	0	0	0	7.19918e-12	0	0	0	0	0	0	0	0	0	0	0	0	0	0	0	0	0	0
798.258	49	4	1	0	2	0	0	0	1	1	0	0	0	0	0	0	0	0	0	0	0	0	0	0		3.07848e-12	5.70519e-13	4.21277e-13	0	6.43867e-12	0	0	0	9.37813e-11	2.06038e-10	0	0	0	0	0	0	0	0	0	0	0	0	0	0
799.656	46	2	0	0	0	0	0	0	0	0	0	0	0	0	0	0	0	0	0	0	0	0	0	0		2.89e-12	2.85259e-13	0	0	0	0	0	0	0	0	0	0	0	0	0	0	0	0	0	0	0	0	0	0
801.054	47	1	0	1	0	1	0	0	0	0	0	0	0	0	0	0	0	0	0	0	0	0	0	0		2.95283e-12	1.4263e-13	0	1.46533e-12	0	7.19918e-12	0	0	0	0	0	0	0	0	0	0	0	0	0	0	0	0	0	0
802.452	42	2	1	0	1	0	0	0	0	0	0	0	0	0	0	0	0	0	0	0	0	0	0	0		2.6387e-12	2.85259e-13	4.21277e-13	0	3.21934e-12	0	0	0	0	0	0	0	0	0	0	0	0	0	0	0	0	0	0	0
803.85	40	4	0	0	1	1	0	0	0	0	0	0	0	0	0	0	0	0	0	0	0	0	0	0		2.51305e-12	5.70519e-13	0	0	3.21934e-12	7.19918e-12	0	0	0	0	0	0	0	0	0	0	0	0	0	0	0	0	0	0
805.248	51	1	1	0	0	0	0	0	0	0	0	0	0	0	0	0	0	0	0	0	0	0	0	0		3.20413e-12	1.4263e-13	4.21277e-13	0	0	0	0	0	0	0	0	0	0	0	0	0	0	0	0	0	0	0	0	0
806.646	31	2	0	1	0	1	0	0	0	0	0	0	0	0	0	0	0	0	0	0	0	0	0	0		1.94761e-12	2.85259e-13	0	1.46533e-12	0	7.19918e-12	0	0	0	0	0	0	0	0	0	0	0	0	0	0	0	0	0	0
808.044	28	5	3	0	0	0	0	0	0	0	0	0	0	0	0	0	0	0	0	0	0	0	0	0		1.75913e-12	7.13148e-13	1.26383e-12	0	0	0	0	0	0	0	0	0	0	0	0	0	0	0	0	0	0	0	0	0
809.442	45	1	1	0	0	1	0	0	0	0	0	0	0	0	0	0	0	0	0	0	0	0	0	0		2.82718e-12	1.4263e-13	4.21277e-13	0	0	7.19918e-12	0	0	0	0	0	0	0	0	0	0	0	0	0	0	0	0	0	0
810.84	34	3	0	0	2	0	1	0	0	0	0	0	0	0	0	0	0	0	0	0	0	0	0	0		2.13609e-12	4.27889e-13	0	0	6.43867e-12	0	1.78287e-11	0	0	0	0	0	0	0	0	0	0	0	0	0	0	0	0	0
812.238	36	3	1	0	1	0	0	0	0	0	0	0	0	0	0	0	0	0	0	0	0	0	0	0		2.26174e-12	4.27889e-13	4.21277e-13	0	3.21934e-12	0	0	0	0	0	0	0	0	0	0	0	0	0	0	0	0	0	0	0
813.636	48	1	1	0	0	0	1	0	0	0	0	0	0	0	0	0	0	0	0	0	0	0	0	0		3.01566e-12	1.4263e-13	4.21277e-13	0	0	0	1.78287e-11	0	0	0	0	0	0	0	0	0	0	0	0	0	0	0	0	0
815.034	33	4	0	0	2	0	0	0	0	0	0	0	0	0	0	0	0	0	0	0	0	0	0	0		2.07326e-12	5.70519e-13	0	0	6.43867e-12	0	0	0	0	0	0	0	0	0	0	0	0	0	0	0	0	0	0	0
816.432	35	4	1	0	2	0	0	0	0	0	0	0	0	0	0	0	0	0	0	0	0	0	0	0		2.19892e-12	5.70519e-13	4.21277e-13	0	6.43867e-12	0	0	0	0	0	0	0	0	0	0	0	0	0	0	0	0	0	0	0
817.83	45	5	0	0	0	0	0	0	1	0	0	0	0	0	0	0	0	0	0	0	0	0	0	0		2.82718e-12	7.13148e-13	0	0	0	0	0	0	9.37813e-11	0	0	0	0	0	0	0	0	0	0	0	0	0	0	0
819.228	27	1	0	0	1	1	0	0	0	0	0	0	0	0	0	0	0	0	0	0	0	0	0	0		1.69631e-12	1.4263e-13	0	0	3.21934e-12	7.19918e-12	0	0	0	0	0	0	0	0	0	0	0	0	0	0	0	0	0	0
820.626	33	2	2	1	0	0	0	0	0	0	0	0	0	0	0	0	0	0	0	0	0	0	0	0		2.07326e-12	2.85259e-13	8.42555e-13	1.46533e-12	0	0	0	0	0	0	0	0	0	0	0	0	0	0	0	0	0	0	0	0
822.024	30	4	0	0	0	2	0	0	0	1	0	0	0	0	0	0	0	0	0	0	0	0	0	0		1.88478e-12	5.70519e-13	0	0	0	1.43984e-11	0	0	0	2.06038e-10	0	0	0	0	0	0	0	0	0	0	0	0	0	0
823.422	32	2	1	1	0	0	0	0	0	0	0	0	0	0	0	0	0	0	0	0	0	0	0	0		2.01044e-12	2.85259e-13	4.21277e-13	1.46533e-12	0	0	0	0	0	0	0	0	0	0	0	0	0	0	0	0	0	0	0	0
824.82	43	5	4	1	1	0	0	0	0	0	0	0	0	0	0	0	0	0	0	0	0	0	0	0		2.70153e-12	7.13148e-13	1.68511e-12	1.46533e-12	3.21934e-12	0	0	0	0	0	0	0	0	0	0	0	0	0	0	0	0	0	0	0
826.218	43	0	0	1	0	1	0	0	0	0	0	0	0	0	0	0	0	0	0	0	0	0	0	0		2.70153e-12	0	0	1.46533e-12	0	7.19918e-12	0	0	0	0	0	0	0	0	0	0	0	0	0	0	0	0	0	0
827.616	34	4	0	0	0	1	0	0	0	0	0	0	0	0	0	0	0	0	0	0	0	0	0	0		2.13609e-12	5.70519e-13	0	0	0	7.19918e-12	0	0	0	0	0	0	0	0	0	0	0	0	0	0	0	0	0	0
829.014	38	2	1	0	2	0	0	0	0	0	0	0	0	0	0	0	0	0	0	0	0	0	0	0		2.38739e-12	2.85259e-13	4.21277e-13	0	6.43867e-12	0	0	0	0	0	0	0	0	0	0	0	0	0	0	0	0	0	0	0
830.412	38	0	2	1	0	0	0	0	0	0	0	0	0	0	0	0	0	0	0	0	0	0	0	0		2.38739e-12	0	8.42555e-13	1.46533e-12	0	0	0	0	0	0	0	0	0	0	0	0	0	0	0	0	0	0	0	0
831.81	40	4	2	0	0	1	0	1	0	0	0	0	0	0	0	0	0	0	0	0	0	0	0	0		2.51305e-12	5.70519e-13	8.42555e-13	0	0	7.19918e-12	0	3.9564e-11	0	0	0	0	0	0	0	0	0	0	0	0	0	0	0	0
833.208	34	0	0	0	0	0	0	0	0	0	0	0	0	0	0	0	0	0	0	0	0	0	0	0		2.13609e-12	0	0	0	0	0	0	0	0	0	0	0	0	0	0	0	0	0	0	0	0	0	0	0
834.606	46	4	0	0	1	0	0	0	0	0	0	0	0	0	0	0	0	0	0	0	0	0	0	0		2.89e-12	5.70519e-13	0	0	3.21934e-12	0	0	0	0	0	0	0	0	0	0	0	0	0	0	0	0	0	0	0
836.004	42	4	0	1	0	1	0	0	0	0	0	0	0	0	0	0	0	0	0	0	0	0	0	0		2.6387e-12	5.70519e-13	0	1.46533e-12	0	7.19918e-12	0	0	0	0	0	0	0	0	0	0	0	0	0	0	0	0	0	0
837.402	44	1	2	0	0	1	0	0	0	0	0	0	0	0	0	0	0	0	0	0	0	0	0	0		2.76435e-12	1.4263e-13	8.42555e-13	0	0	7.19918e-12	0	0	0	0	0	0	0	0	0	0	0	0	0	0	0	0	0	0
838.8	42	2	0	0	1	0	0	0	0	0	0	0	0	0	0	0	0	0	0	0	0	0	0	0		2.6387e-12	2.85259e-13	0	0	3.21934e-12	0	0	0	0	0	0	0	0	0	0	0	0	0	0	0	0	0	0	0
840.198	50	2	1	0	1	0	1	0	0	0	0	0	0	0	0	0	0	0	0	0	0	0	0	0		3.14131e-12	2.85259e-13	4.21277e-13	0	3.21934e-12	0	1.78287e-11	0	0	0	0	0	0	0	0	0	0	0	0	0	0	0	0	0
841.596	43	1	0	0	0	0	0	0	0	0	0	0	0	0	0	0	0	0	0	0	0	0	0	0		2.70153e-12	1.4263e-13	0	0	0	0	0	0	0	0	0	0	0	0	0	0	0	0	0	0	0	0	0	0
842.994	41	2	0	0	2	1	0	0	0	0	0	0	0	0	0	0	0	0	0	0	0	0	0	0		2.57587e-12	2.85259e-13	0	0	6.43867e-12	7.19918e-12	0	0	0	0	0	0	0	0	0	0	0	0	0	0	0	0	0	0
844.392	38	2	3	0	0	0	0	0	0	0	0	0	0	0	0	0	0	0	0	0	0	0	0	0		2.38739e-12	2.85259e-13	1.26383e-12	0	0	0	0	0	0	0	0	0	0	0	0	0	0	0	0	0	0	0	0	0
845.79	48	3	3	1	1	0	0	0	0	0	0	0	0	0	0	0	0	0	0	0	0	0	0	0		3.01566e-12	4.27889e-13	1.26383e-12	1.46533e-12	3.21934e-12	0	0	0	0	0	0	0	0	0	0	0	0	0	0	0	0	0	0	0
847.188	55	4	0	2	0	1	0	0	0	0	0	0	0	0	0	0	0	0	0	0	0	0	0	0		3.45544e-12	5.70519e-13	0	2.93067e-12	0	7.19918e-12	0	0	0	0	0	0	0	0	0	0	0	0	0	0	0	0	0	0
848.586	36	4	1	1	1	0	1	0	0	0	0	0	0	0	0	0	0	0	0	0	0	0	0	0		2.26174e-12	5.70519e-13	4.21277e-13	1.46533e-12	3.21934e-12	0	1.78287e-11	0	0	0	0	0	0	0	0	0	0	0	0	0	0	0	0	0
849.984	41	2	2	0	0	0	0	0	0	0	0	0	0	0	0	0	0	0	0	0	0	0	0	0		2.57587e-12	2.85259e-13	8.42555e-13	0	0	0	0	0	0	0	0	0	0	0	0	0	0	0	0	0	0	0	0	0
851.382	32	1	1	0	1	0	0	0	0	0	0	0	0	0	0	0	0	0	0	0	0	0	0	0		2.01044e-12	1.4263e-13	4.21277e-13	0	3.21934e-12	0	0	0	0	0	0	0	0	0	0	0	0	0	0	0	0	0	0	0
852.78	33	4	1	0	1	0	1	0	0	0	0	0	0	0	0	0	0	0	0	0	0	0	0	0		2.07326e-12	5.70519e-13	4.21277e-13	0	3.21934e-12	0	1.78287e-11	0	0	0	0	0	0	0	0	0	0	0	0	0	0	0	0	0
854.178	47	0	0	0	0	1	0	0	0	0	0	0	0	0	0	0	0	0	0	0	0	0	0	0		2.95283e-12	0	0	0	0	7.19918e-12	0	0	0	0	0	0	0	0	0	0	0	0	0	0	0	0	0	0
855.576	34	1	3	1	0	1	0	0	0	0	0	0	0	0	0	0	0	0	0	0	0	0	0	0		2.13609e-12	1.4263e-13	1.26383e-12	1.46533e-12	0	7.19918e-12	0	0	0	0	0	0	0	0	0	0	0	0	0	0	0	0	0	0
856.974	40	1	1	1	0	0	0	0	0	0	0	0	0	0	0	0	0	0	0	0	0	0	0	0		2.51305e-12	1.4263e-13	4.21277e-13	1.46533e-12	0	0	0	0	0	0	0	0	0	0	0	0	0	0	0	0	0	0	0	0
858.372	43	0	1	0	1	0	0	0	0	0	0	0	0	0	0	0	0	0	0	0	0	0	0	0		2.70153e-12	0	4.21277e-13	0	3.21934e-12	0	0	0	0	0	0	0	0	0	0	0	0	0	0	0	0	0	0	0
859.77	53	4	1	0	0	0	0	0	0	0	0	0	0	0	0	0	0	0	0	0	0	0	0	0		3.32979e-12	5.70519e-13	4.21277e-13	0	0	0	0	0	0	0	0	0	0	0	0	0	0	0	0	0	0	0	0	0
861.168	56	0	0	1	1	0	0	0	0	0	0	0	0	0	0	0	0	0	0	0	0	0	0	0		3.51827e-12	0	0	1.46533e-12	3.21934e-12	0	0	0	0	0	0	0	0	0	0	0	0	0	0	0	0	0	0	0
862.566	42	3	1	0	1	0	0	0	0	0	0	0	0	0	0	0	0	0	0	0	0	0	0	0		2.6387e-12	4.27889e-13	4.21277e-13	0	3.21934e-12	0	0	0	0	0	0	0	0	0	0	0	0	0	0	0	0	0	0	0
863.964	49	1	1	1	0	0	1	0	0	0	0	0	0	0	0	0	0	0	0	0	0	0	0	0		3.07848e-12	1.4263e-13	4.21277e-13	1.46533e-12	0	0	1.78287e-11	0	0	0	0	0	0	0	0	0	0	0	0	0	0	0	0	0
865.362	45	2	0	3	2	0	0	0	0	0	0	0	0	0	0	0	0	0	0	0	0	0	0	0		2.82718e-12	2.85259e-13	0	4.396e-12	6.43867e-12	0	0	0	0	0	0	0	0	0	0	0	0	0	0	0	0	0	0	0
866.76	39	3	0	0	0	0	0	0	0	0	0	0	0	0	0	0	0	0	0	0	0	0	0	0		2.45022e-12	4.27889e-13	0	0	0	0	0	0	0	0	0	0	0	0	0	0	0	0	0	0	0	0	0	0
868.158	46	3	0	0	0	0	0	0	0	0	0	0	0	0	0	0	0	0	0	0	0	0	0	0		2.89e-12	4.27889e-13	0	0	0	0	0	0	0	0	0	0	0	0	0	0	0	0	0	0	0	0	0	0
869.556	49	2	3	0	0	0	0	0	1	0	0	0	0	0	0	0	0	0	0	0	0	0	0	0		3.07848e-12	2.85259e-13	1.26383e-12	0	0	0	0	0	9.37813e-11	0	0	0	0	0	0	0	0	0	0	0	0	0	0	0
870.954	50	3	0	0	0	1	1	0	0	0	0	0	0	0	0	0	0	0	0	0	0	0	0	0		3.14131e-12	4.27889e-13	0	0	0	7.19918e-12	1.78287e-11	0	0	0	0	0	0	0	0	0	0	0	0	0	0	0	0	0
872.352	59	2	0	0	2	0	1	0	0	0	0	0	0	0	0	0	0	0	0	0	0	0	0	0		3.70674e-12	2.85259e-13	0	0	6.43867e-12	0	1.78287e-11	0	0	0	0	0	0	0	0	0	0	0	0	0	0	0	0	0
873.75	35	5	0	0	1	1	0	1	0	0	0	0	0	0	0	0	0	0	0	0	0	0	0	0		2.19892e-12	7.13148e-13	0	0	3.21934e-12	7.19918e-12	0	3.9564e-11	0	0	0	0	0	0	0	0	0	0	0	0	0	0	0	0
875.148	52	2	1	0	0	0	0	0	0	0	0	0	0	0	0	0	0	0	0	0	0	0	0	0		3.26696e-12	2.85259e-13	4.21277e-13	0	0	0	0	0	0	0	0	0	0	0	0	0	0	0	0	0	0	0	0	0
876.546	36	5	3	0	0	0	0	0	0	0	0	0	0	0	0	0	0	0	0	0	0	0	0	0		2.26174e-12	7.13148e-13	1.26383e-12	0	0	0	0	0	0	0	0	0	0	0	0	0	0	0	0	0	0	0	0	0
877.944	45	1	2	0	0	0	0	0	0	0	0	0	0	0	0	0	0	0	0	0	0	0	0	0		2.82718e-12	1.4263e-13	8.42555e-13	0	0	0	0	0	0	0	0	0	0	0	0	0	0	0	0	0	0	0	0	0
879.342	40	1	0	0	0	0	0	0	0	0	0	0	0	0	0	0	0	0	0	0	0	0	0	0		2.51305e-12	1.4263e-13	0	0	0	0	0	0	0	0	0	0	0	0	0	0	0	0	0	0	0	0	0	0
880.74	38	1	0	0	0	0	0	0	0	0	0	0	0	0	0	0	0	0	0	0	0	0	0	0		2.38739e-12	1.4263e-13	0	0	0	0	0	0	0	0	0	0	0	0	0	0	0	0	0	0	0	0	0	0
882.138	42	1	3	0	0	2	0	0	0	0	0	0	0	0	0	0	0	0	0	0	0	0	0	0		2.6387e-12	1.4263e-13	1.26383e-12	0	0	1.43984e-11	0	0	0	0	0	0	0	0	0	0	0	0	0	0	0	0	0	0
883.536	36	0	0	0	1	0	0	0	0	0	0	0	0	0	0	0	0	0	0	0	0	0	0	0		2.26174e-12	0	0	0	3.21934e-12	0	0	0	0	0	0	0	0	0	0	0	0	0	0	0	0	0	0	0
884.934	54	3	2	0	1	0	0	0	0	0	0	0	0	0	0	0	0	0	0	0	0	0	0	0		3.39261e-12	4.27889e-13	8.42555e-13	0	3.21934e-12	0	0	0	0	0	0	0	0	0	0	0	0	0	0	0	0	0	0	0
886.332	49	2	2	0	0	1	1	0	0	0	0	0	0	0	0	0	0	0	0	0	0	0	0	0		3.07848e-12	2.85259e-13	8.42555e-13	0	0	7.19918e-12	1.78287e-11	0	0	0	0	0	0	0	0	0	0	0	0	0	0	0	0	0
887.73	44	0	1	0	0	0	0	0	0	0	0	0	0	0	0	0	0	0	0	0	0	0	0	0		2.76435e-12	0	4.21277e-13	0	0	0	0	0	0	0	0	0	0	0	0	0	0	0	0	0	0	0	0	0
889.128	40	3	0	0	0	1	1	0	0	1	0	0	0	0	0	0	0	0	0	0	0	0	0	0		2.51305e-12	4.27889e-13	0	0	0	7.19918e-12	1.78287e-11	0	0	2.06038e-10	0	0	0	0	0	0	0	0	0	0	0	0	0	0
890.526	41	2	0	0	2	0	0	0	0	0	0	0	0	0	0	0	0	0	0	0	0	0	0	0		2.57587e-12	2.85259e-13	0	0	6.43867e-12	0	0	0	0	0	0	0	0	0	0	0	0	0	0	0	0	0	0	0
891.924	39	3	0	1	1	3	0	0	0	0	0	0	0	0	0	0	0	0	0	0	0	0	0	0		2.45022e-12	4.27889e-13	0	1.46533e-12	3.21934e-12	2.15975e-11	0	0	0	0	0	0	0	0	0	0	0	0	0	0	0	0	0	0
893.322	37	3	0	0	0	1	0	0	0	0	0	0	0	0	0	0	0	0	0	0	0	0	0	0		2.32457e-12	4.27889e-13	0	0	0	7.19918e-12	0	0	0	0	0	0	0	0	0	0	0	0	0	0	0	0	0	0
894.72	37	4	1	0	0	0	0	0	0	0	0	0	0	0	0	0	0	0	0	0	0	0	0	0		2.32457e-12	5.70519e-13	4.21277e-13	0	0	0	0	0	0	0	0	0	0	0	0	0	0	0	0	0	0	0	0	0
896.118	41	4	0	0	0	1	0	0	0	0	0	0	0	0	0	0	0	0	0	0	0	0	0	0		2.57587e-12	5.70519e-13	0	0	0	7.19918e-12	0	0	0	0	0	0	0	0	0	0	0	0	0	0	0	0	0	0
897.516	45	2	0	0	1	2	0	0	0	0	0	0	0	0	0	0	0	0	0	0	0	0	0	0		2.82718e-12	2.85259e-13	0	0	3.21934e-12	1.43984e-11	0	0	0	0	0	0	0	0	0	0	0	0	0	0	0	0	0	0
898.914	45	2	0	0	1	1	0	0	0	0	0	0	0	0	0	0	0	0	0	0	0	0	0	0		2.82718e-12	2.85259e-13	0	0	3.21934e-12	7.19918e-12	0	0	0	0	0	0	0	0	0	0	0	0	0	0	0	0	0	0
900.312	43	4	2	0	0	0	0	0	0	0	0	0	0	0	0	0	0	0	0	0	0	0	0	0		2.70153e-12	5.70519e-13	8.42555e-13	0	0	0	0	0	0	0	0	0	0	0	0	0	0	0	0	0	0	0	0	0
901.71	47	2	2	0	1	4	0	0	0	0	0	0	0	0	0	0	0	0	0	0	0	0	0	0		2.95283e-12	2.85259e-13	8.42555e-13	0	3.21934e-12	2.87967e-11	0	0	0	0	0	0	0	0	0	0	0	0	0	0	0	0	0	0
903.108	35	1	3	0	0	1	0	0	0	0	0	0	0	0	0	0	0	0	0	0	0	0	0	0		2.19892e-12	1.4263e-13	1.26383e-12	0	0	7.19918e-12	0	0	0	0	0	0	0	0	0	0	0	0	0	0	0	0	0	0
904.506	50	3	1	0	0	0	0	0	0	0	0	0	0	0	0	0	0	0	0	0	0	0	0	0		3.14131e-12	4.27889e-13	4.21277e-13	0	0	0	0	0	0	0	0	0	0	0	0	0	0	0	0	0	0	0	0	0
905.904	41	0	2	1	1	0	0	0	0	0	0	0	0	0	0	0	0	0	0	0	0	0	0	0		2.57587e-12	0	8.42555e-13	1.46533e-12	3.21934e-12	0	0	0	0	0	0	0	0	0	0	0	0	0	0	0	0	0	0	0
907.302	31	0	1	0	0	0	0	0	0	0	0	0	0	0	0	0	0	0	0	0	0	0	0	0		1.94761e-12	0	4.21277e-13	0	0	0	0	0	0	0	0	0	0	0	0	0	0	0	0	0	0	0	0	0
908.7	40	1	1	1	0	1	0	0	0	0	0	0	0	0	0	0	0	0	0	0	0	0	0	0		2.51305e-12	1.4263e-13	4.21277e-13	1.46533e-12	0	7.19918e-12	0	0	0	0	0	0	0	0	0	0	0	0	0	0	0	0	0	0
910.098	41	4	0	1	0	0	0	0	0	0	0	0	0	0	0	0	0	0	0	0	0	0	0	0		2.57587e-12	5.70519e-13	0	1.46533e-12	0	0	0	0	0	0	0	0	0	0	0	0	0	0	0	0	0	0	0	0
911.496	36	3	1	0	0	0	1	0	0	0	0	0	0	0	0	0	0	0	0	0	0	0	0	0		2.26174e-12	4.27889e-13	4.21277e-13	0	0	0	1.78287e-11	0	0	0	0	0	0	0	0	0	0	0	0	0	0	0	0	0
912.894	43	2	2	0	0	0	0	0	0	0	0	0	0	0	0	0	0	0	0	0	0	0	0	0		2.70153e-12	2.85259e-13	8.42555e-13	0	0	0	0	0	0	0	0	0	0	0	0	0	0	0	0	0	0	0	0	0
914.292	40	1	2	0	1	0	0	0	0	0	0	0	0	0	0	0	0	0	0	0	0	0	0	0		2.51305e-12	1.4263e-13	8.42555e-13	0	3.21934e-12	0	0	0	0	0	0	0	0	0	0	0	0	0	0	0	0	0	0	0
915.69	36	4	1	1	1	0	0	0	0	0	0	0	0	0	0	0	0	0	0	0	0	0	0	0		2.26174e-12	5.70519e-13	4.21277e-13	1.46533e-12	3.21934e-12	0	0	0	0	0	0	0	0	0	0	0	0	0	0	0	0	0	0	0
917.088	46	5	2	0	3	0	0	0	0	0	0	0	0	0	0	0	0	0	0	0	0	0	0	0		2.89e-12	7.13148e-13	8.42555e-13	0	9.65801e-12	0	0	0	0	0	0	0	0	0	0	0	0	0	0	0	0	0	0	0
918.486	53	3	2	1	0	1	0	0	0	0	0	0	0	0	0	0	0	0	0	0	0	0	0	0		3.32979e-12	4.27889e-13	8.42555e-13	1.46533e-12	0	7.19918e-12	0	0	0	0	0	0	0	0	0	0	0	0	0	0	0	0	0	0
919.884	49	1	3	0	2	0	0	0	0	0	0	0	0	0	0	0	0	0	0	0	0	0	0	0		3.07848e-12	1.4263e-13	1.26383e-12	0	6.43867e-12	0	0	0	0	0	0	0	0	0	0	0	0	0	0	0	0	0	0	0
921.282	46	2	3	0	0	1	0	1	0	0	0	0	0	0	0	0	0	0	0	0	0	0	0	0		2.89e-12	2.85259e-13	1.26383e-12	0	0	7.19918e-12	0	3.9564e-11	0	0	0	0	0	0	0	0	0	0	0	0	0	0	0	0
922.68	43	2	1	0	1	1	0	0	0	0	0	0	0	0	0	0	0	0	0	0	0	0	0	0		2.70153e-12	2.85259e-13	4.21277e-13	0	3.21934e-12	7.19918e-12	0	0	0	0	0	0	0	0	0	0	0	0	0	0	0	0	0	0
924.078	38	5	0	0	0	1	0	0	0	0	0	0	0	0	0	0	0	0	0	0	0	0	0	0		2.38739e-12	7.13148e-13	0	0	0	7.19918e-12	0	0	0	0	0	0	0	0	0	0	0	0	0	0	0	0	0	0
925.476	51	2	0	0	0	1	1	0	1	0	0	0	0	0	0	0	0	0	0	0	0	0	0	0		3.20413e-12	2.85259e-13	0	0	0	7.19918e-12	1.78287e-11	0	9.37813e-11	0	0	0	0	0	0	0	0	0	0	0	0	0	0	0
926.874	46	3	0	0	2	1	0	0	0	0	0	0	0	0	0	0	0	0	0	0	0	0	0	0		2.89e-12	4.27889e-13	0	0	6.43867e-12	7.19918e-12	0	0	0	0	0	0	0	0	0	0	0	0	0	0	0	0	0	0
928.272	36	1	0	3	0	0	0	0	0	0	0	0	0	0	0	0	0	0	0	0	0	0	0	0		2.26174e-12	1.4263e-13	0	4.396e-12	0	0	0	0	0	0	0	0	0	0	0	0	0	0	0	0	0	0	0	0
929.67	54	5	3	1	1	0	0	0	0	0	0	0	0	0	0	0	0	0	0	0	0	0	0	0		3.39261e-12	7.13148e-13	1.26383e-12	1.46533e-12	3.21934e-12	0	0	0	0	0	0	0	0	0	0	0	0	0	0	0	0	0	0	0
931.068	39	4	2	0	0	0	0	0	0	0	0	0	0	0	0	0	0	0	0	0	0	0	0	0		2.45022e-12	5.70519e-13	8.42555e-13	0	0	0	0	0	0	0	0	0	0	0	0	0	0	0	0	0	0	0	0	0
932.466	41	3	0	0	0	0	0	0	0	0	0	1	0	0	0	0	0	0	0	0	0	0	0	0		2.57587e-12	4.27889e-13	0	0	0	0	0	0	0	0	0	7.50251e-10	0	0	0	0	0	0	0	0	0	0	0	0
933.864	38	3	1	0	0	1	0	0	0	0	0	0	0	0	0	0	0	0	0	0	0	0	0	0		2.38739e-12	4.27889e-13	4.21277e-13	0	0	7.19918e-12	0	0	0	0	0	0	0	0	0	0	0	0	0	0	0	0	0	0
935.262	41	2	0	1	0	0	0	0	0	0	0	0	0	0	0	0	0	0	0	0	0	0	0	0		2.57587e-12	2.85259e-13	0	1.46533e-12	0	0	0	0	0	0	0	0	0	0	0	0	0	0	0	0	0	0	0	0
936.66	55	2	0	0	0	1	0	1	0	0	0	0	0	0	0	0	0	0	0	0	0	0	0	0		3.45544e-12	2.85259e-13	0	0	0	7.19918e-12	0	3.9564e-11	0	0	0	0	0	0	0	0	0	0	0	0	0	0	0	0
938.058	50	2	0	0	1	0	0	0	0	0	0	0	0	0	0	0	0	0	0	0	0	0	0	0		3.14131e-12	2.85259e-13	0	0	3.21934e-12	0	0	0	0	0	0	0	0	0	0	0	0	0	0	0	0	0	0	0
939.456	43	1	1	0	1	0	1	1	0	0	0	0	0	0	0	0	0	0	0	0	0	0	0	0		2.70153e-12	1.4263e-13	4.21277e-13	0	3.21934e-12	0	1.78287e-11	3.9564e-11	0	0	0	0	0	0	0	0	0	0	0	0	0	0	0	0
940.854	50	0	2	0	0	1	0	0	0	0	0	0	0	0	0	0	0	0	0	0	0	0	0	0		3.14131e-12	0	8.42555e-13	0	0	7.19918e-12	0	0	0	0	0	0	0	0	0	0	0	0	0	0	0	0	0	0
942.252	43	3	1	0	0	0	0	0	0	0	0	0	0	0	0	0	0	0	0	0	0	0	0	0		2.70153e-12	4.27889e-13	4.21277e-13	0	0	0	0	0	0	0	0	0	0	0	0	0	0	0	0	0	0	0	0	0
943.65	54	0	6	0	0	0	0	0	0	0	0	0	0	0	0	0	0	0	0	0	0	0	0	0		3.39261e-12	0	2.52766e-12	0	0	0	0	0	0	0	0	0	0	0	0	0	0	0	0	0	0	0	0	0
945.048	53	6	0	2	0	0	0	0	0	0	0	0	0	0	0	0	0	0	0	0	0	0	0	0		3.32979e-12	8.55778e-13	0	2.93067e-12	0	0	0	0	0	0	0	0	0	0	0	0	0	0	0	0	0	0	0	0
946.446	45	3	3	1	0	0	0	0	0	0	0	0	0	0	0	0	0	0	0	0	0	0	0	0		2.82718e-12	4.27889e-13	1.26383e-12	1.46533e-12	0	0	0	0	0	0	0	0	0	0	0	0	0	0	0	0	0	0	0	0
947.844	61	1	0	0	0	0	0	0	0	0	0	0	0	0	0	0	0	0	0	0	0	0	0	0		3.8324e-12	1.4263e-13	0	0	0	0	0	0	0	0	0	0	0	0	0	0	0	0	0	0	0	0	0	0
949.242	69	2	1	0	0	0	0	0	0	0	0	0	0	0	0	0	0	0	0	0	0	0	0	0		4.33501e-12	2.85259e-13	4.21277e-13	0	0	0	0	0	0	0	0	0	0	0	0	0	0	0	0	0	0	0	0	0
950.64	38	3	1	1	0	0	1	0	0	0	0	0	0	0	0	0	0	0	0	0	0	0	0	0		2.38739e-12	4.27889e-13	4.21277e-13	1.46533e-12	0	0	1.78287e-11	0	0	0	0	0	0	0	0	0	0	0	0	0	0	0	0	0
952.038	49	5	1	0	0	0	0	0	0	0	0	0	0	0	0	0	0	0	0	0	0	0	0	0		3.07848e-12	7.13148e-13	4.21277e-13	0	0	0	0	0	0	0	0	0	0	0	0	0	0	0	0	0	0	0	0	0
953.436	62	1	1	1	0	2	0	0	0	0	0	0	0	0	0	0	0	0	0	0	0	0	0	0		3.89522e-12	1.4263e-13	4.21277e-13	1.46533e-12	0	1.43984e-11	0	0	0	0	0	0	0	0	0	0	0	0	0	0	0	0	0	0
954.834	50	1	2	0	2	0	0	0	0	0	0	0	0	0	0	0	0	0	0	0	0	0	0	0		3.14131e-12	1.4263e-13	8.42555e-13	0	6.43867e-12	0	0	0	0	0	0	0	0	0	0	0	0	0	0	0	0	0	0	0
956.232	50	3	0	0	1	0	0	0	0	0	0	0	0	0	0	0	0	0	0	0	0	0	0	0		3.14131e-12	4.27889e-13	0	0	3.21934e-12	0	0	0	0	0	0	0	0	0	0	0	0	0	0	0	0	0	0	0
957.63	45	5	1	0	2	1	0	0	0	0	0	0	0	0	0	0	0	0	0	0	0	0	0	0		2.82718e-12	7.13148e-13	4.21277e-13	0	6.43867e-12	7.19918e-12	0	0	0	0	0	0	0	0	0	0	0	0	0	0	0	0	0	0
959.028	42	2	2	0	0	1	0	0	0	0	0	0	0	0	0	0	0	0	0	0	0	0	0	0		2.6387e-12	2.85259e-13	8.42555e-13	0	0	7.19918e-12	0	0	0	0	0	0	0	0	0	0	0	0	0	0	0	0	0	0
960.426	39	1	2	0	0	0	0	0	0	0	0	0	0	0	0	0	0	0	0	0	0	0	0	0		2.45022e-12	1.4263e-13	8.42555e-13	0	0	0	0	0	0	0	0	0	0	0	0	0	0	0	0	0	0	0	0	0
961.824	36	6	2	0	0	1	0	0	0	0	0	0	0	0	0	0	0	0	0	0	0	0	0	0		2.26174e-12	8.55778e-13	8.42555e-13	0	0	7.19918e-12	0	0	0	0	0	0	0	0	0	0	0	0	0	0	0	0	0	0
963.222	51	4	0	0	0	1	2	0	0	0	0	0	0	0	0	0	0	0	0	0	0	0	0	0		3.20413e-12	5.70519e-13	0	0	0	7.19918e-12	3.56574e-11	0	0	0	0	0	0	0	0	0	0	0	0	0	0	0	0	0
964.62	34	6	2	1	0	1	1	0	0	0	0	0	0	0	0	0	0	0	0	0	0	0	0	0		2.13609e-12	8.55778e-13	8.42555e-13	1.46533e-12	0	7.19918e-12	1.78287e-11	0	0	0	0	0	0	0	0	0	0	0	0	0	0	0	0	0
966.018	46	4	4	1	1	0	0	0	1	0	0	0	0	0	0	0	0	0	0	0	0	0	0	0		2.89e-12	5.70519e-13	1.68511e-12	1.46533e-12	3.21934e-12	0	0	0	9.37813e-11	0	0	0	0	0	0	0	0	0	0	0	0	0	0	0
967.416	54	0	0	0	0	0	0	0	0	0	0	0	0	0	0	0	0	0	0	0	0	0	0	0		3.39261e-12	0	0	0	0	0	0	0	0	0	0	0	0	0	0	0	0	0	0	0	0	0	0	0
968.814	58	1	0	1	1	1	0	0	0	0	0	0	0	0	0	0	0	0	0	0	0	0	0	0		3.64392e-12	1.4263e-13	0	1.46533e-12	3.21934e-12	7.19918e-12	0	0	0	0	0	0	0	0	0	0	0	0	0	0	0	0	0	0
970.212	46	1	1	0	0	0	0	0	0	0	0	0	0	0	0	0	0	0	0	0	0	0	0	0		2.89e-12	1.4263e-13	4.21277e-13	0	0	0	0	0	0	0	0	0	0	0	0	0	0	0	0	0	0	0	0	0
971.61	42	4	1	1	0	0	1	0	0	0	0	0	0	0	0	0	0	0	0	0	0	0	0	0		2.6387e-12	5.70519e-13	4.21277e-13	1.46533e-12	0	0	1.78287e-11	0	0	0	0	0	0	0	0	0	0	0	0	0	0	0	0	0
973.008	50	5	3	1	0	0	0	0	0	0	0	0	0	0	0	0	0	0	0	0	0	0	0	0		3.14131e-12	7.13148e-13	1.26383e-12	1.46533e-12	0	0	0	0	0	0	0	0	0	0	0	0	0	0	0	0	0	0	0	0
974.406	58	4	1	0	0	1	0	0	0	0	0	0	0	0	0	0	0	0	0	0	0	0	0	0		3.64392e-12	5.70519e-13	4.21277e-13	0	0	7.19918e-12	0	0	0	0	0	0	0	0	0	0	0	0	0	0	0	0	0	0
975.804	54	5	3	0	0	1	1	0	0	0	0	0	0	0	0	0	0	0	0	0	0	0	0	0		3.39261e-12	7.13148e-13	1.26383e-12	0	0	7.19918e-12	1.78287e-11	0	0	0	0	0	0	0	0	0	0	0	0	0	0	0	0	0
977.202	56	3	2	0	0	0	0	1	0	0	0	0	0	0	0	0	0	0	0	0	0	0	0	0		3.51827e-12	4.27889e-13	8.42555e-13	0	0	0	0	3.9564e-11	0	0	0	0	0	0	0	0	0	0	0	0	0	0	0	0
978.6	54	1	2	0	0	0	0	0	0	0	0	0	0	0	0	0	0	0	0	0	0	0	0	0		3.39261e-12	1.4263e-13	8.42555e-13	0	0	0	0	0	0	0	0	0	0	0	0	0	0	0	0	0	0	0	0	0
979.998	49	4	0	0	1	0	0	0	0	0	0	0	0	0	0	0	0	0	0	0	0	0	0	0		3.07848e-12	5.70519e-13	0	0	3.21934e-12	0	0	0	0	0	0	0	0	0	0	0	0	0	0	0	0	0	0	0
981.396	38	2	0	0	0	0	1	0	0	0	0	0	0	0	0	0	0	0	0	0	0	0	0	0		2.38739e-12	2.85259e-13	0	0	0	0	1.78287e-11	0	0	0	0	0	0	0	0	0	0	0	0	0	0	0	0	0
982.794	45	2	1	1	1	1	0	0	0	0	0	0	0	0	0	0	0	0	0	0	0	0	0	0		2.82718e-12	2.85259e-13	4.21277e-13	1.46533e-12	3.21934e-12	7.19918e-12	0	0	0	0	0	0	0	0	0	0	0	0	0	0	0	0	0	0
984.192	56	5	0	1	1	0	0	0	0	0	0	0	0	0	0	0	0	0	0	0	0	0	0	0		3.51827e-12	7.13148e-13	0	1.46533e-12	3.21934e-12	0	0	0	0	0	0	0	0	0	0	0	0	0	0	0	0	0	0	0
985.59	45	2	0	1	1	1	0	0	0	0	0	0	0	0	0	0	0	0	0	0	0	0	0	0		2.82718e-12	2.85259e-13	0	1.46533e-12	3.21934e-12	7.19918e-12	0	0	0	0	0	0	0	0	0	0	0	0	0	0	0	0	0	0
986.988	42	2	3	0	0	0	0	0	0	0	0	0	0	0	0	0	0	0	0	0	0	0	0	0		2.6387e-12	2.85259e-13	1.26383e-12	0	0	0	0	0	0	0	0	0	0	0	0	0	0	0	0	0	0	0	0	0
988.386	53	5	2	0	0	0	0	0	0	0	0	0	0	0	0	0	0	0	0	0	0	0	0	0		3.32979e-12	7.13148e-13	8.42555e-13	0	0	0	0	0	0	0	0	0	0	0	0	0	0	0	0	0	0	0	0	0
989.784	53	2	0	0	0	0	0	0	0	0	0	0	0	0	0	0	0	0	0	0	0	0	0	0		3.32979e-12	2.85259e-13	0	0	0	0	0	0	0	0	0	0	0	0	0	0	0	0	0	0	0	0	0	0
991.182	53	2	1	0	0	0	0	0	0	0	0	0	0	0	0	0	0	0	0	0	0	0	0	0		3.32979e-12	2.85259e-13	4.21277e-13	0	0	0	0	0	0	0	0	0	0	0	0	0	0	0	0	0	0	0	0	0
992.58	57	3	0	1	1	1	0	0	0	0	0	0	0	0	0	0	0	0	0	0	0	0	0	0		3.58109e-12	4.27889e-13	0	1.46533e-12	3.21934e-12	7.19918e-12	0	0	0	0	0	0	0	0	0	0	0	0	0	0	0	0	0	0
993.978	37	4	0	0	4	1	0	0	0	0	0	0	0	0	0	0	0	0	0	0	0	0	0	0		2.32457e-12	5.70519e-13	0	0	1.28773e-11	7.19918e-12	0	0	0	0	0	0	0	0	0	0	0	0	0	0	0	0	0	0
995.376	55	2	1	0	0	0	0	0	0	0	0	0	0	0	0	0	0	0	0	0	0	0	0	0		3.45544e-12	2.85259e-13	4.21277e-13	0	0	0	0	0	0	0	0	0	0	0	0	0	0	0	0	0	0	0	0	0
996.774	54	2	1	0	1	0	1	0	0	0	0	0	0	0	0	0	0	0	0	0	0	0	0	0		3.39261e-12	2.85259e-13	4.21277e-13	0	3.21934e-12	0	1.78287e-11	0	0	0	0	0	0	0	0	0	0	0	0	0	0	0	0	0
998.172	49	2	1	1	1	1	1	0	0	0	0	0	0	0	0	0	0	0	0	0	0	0	0	0		3.07848e-12	2.85259e-13	4.21277e-13	1.46533e-12	3.21934e-12	7.19918e-12	1.78287e-11	0	0	0	0	0	0	0	0	0	0	0	0	0	0	0	0	0
999.57	56	3	3	0	0	1	1	1	1	0	0	0	0	0	0	0	0	0	0	0	0	0	0	0		3.51827e-12	4.27889e-13	1.26383e-12	0	0	7.19918e-12	1.78287e-11	3.9564e-11	9.37813e-11	0	0	0	0	0	0	0	0	0	0	0	0	0	0	0
1000.97	39	2	1	2	0	0	0	0	0	0	0	0	0	0	0	0	0	0	0	0	0	0	0	0		2.45022e-12	2.85259e-13	4.21277e-13	2.93067e-12	0	0	0	0	0	0	0	0	0	0	0	0	0	0	0	0	0	0	0	0
1002.37	58	5	0	0	1	1	0	0	0	0	0	0	0	0	0	0	0	0	0	0	0	0	0	0		3.64392e-12	7.13148e-13	0	0	3.21934e-12	7.19918e-12	0	0	0	0	0	0	0	0	0	0	0	0	0	0	0	0	0	0
1003.76	47	0	2	0	0	0	0	0	0	0	0	0	0	0	0	0	0	0	0	0	0	0	0	0		2.95283e-12	0	8.42555e-13	0	0	0	0	0	0	0	0	0	0	0	0	0	0	0	0	0	0	0	0	0
1005.16	46	2	2	0	0	0	0	0	0	0	0	0	0	0	0	0	0	0	0	0	0	0	0	0		2.89e-12	2.85259e-13	8.42555e-13	0	0	0	0	0	0	0	0	0	0	0	0	0	0	0	0	0	0	0	0	0
1006.56	43	2	0	0	0	0	0	0	0	0	0	0	0	0	0	0	0	0	0	0	0	0	0	0		2.70153e-12	2.85259e-13	0	0	0	0	0	0	0	0	0	0	0	0	0	0	0	0	0	0	0	0	0	0
1007.96	53	2	1	1	1	1	0	0	0	0	0	0	0	0	0	0	0	0	0	0	0	0	0	0		3.32979e-12	2.85259e-13	4.21277e-13	1.46533e-12	3.21934e-12	7.19918e-12	0	0	0	0	0	0	0	0	0	0	0	0	0	0	0	0	0	0
1009.36	61	3	1	0	0	0	1	0	0	0	0	0	0	0	0	0	0	0	0	0	0	0	0	0		3.8324e-12	4.27889e-13	4.21277e-13	0	0	0	1.78287e-11	0	0	0	0	0	0	0	0	0	0	0	0	0	0	0	0	0
1010.75	41	1	2	0	0	1	0	0	0	0	0	0	0	0	0	0	0	0	0	0	0	0	0	0		2.57587e-12	1.4263e-13	8.42555e-13	0	0	7.19918e-12	0	0	0	0	0	0	0	0	0	0	0	0	0	0	0	0	0	0
1012.15	35	3	0	0	0	0	0	0	0	0	0	0	0	0	0	0	0	0	0	0	0	0	0	0		2.19892e-12	4.27889e-13	0	0	0	0	0	0	0	0	0	0	0	0	0	0	0	0	0	0	0	0	0	0
1013.55	51	3	0	0	0	0	0	0	0	0	0	0	0	0	0	0	0	0	0	0	0	0	0	0		3.20413e-12	4.27889e-13	0	0	0	0	0	0	0	0	0	0	0	0	0	0	0	0	0	0	0	0	0	0
1014.95	54	3	2	0	1	1	0	0	0	0	0	0	0	0	0	0	0	0	0	0	0	0	0	0		3.39261e-12	4.27889e-13	8.42555e-13	0	3.21934e-12	7.19918e-12	0	0	0	0	0	0	0	0	0	0	0	0	0	0	0	0	0	0
1016.35	39	4	0	0	1	0	0	0	0	0	0	0	0	0	0	0	0	0	0	0	0	0	0	0		2.45022e-12	5.70519e-13	0	0	3.21934e-12	0	0	0	0	0	0	0	0	0	0	0	0	0	0	0	0	0	0	0
1017.74	48	1	1	0	0	0	0	0	0	0	0	0	0	0	0	0	0	0	0	0	0	0	0	0		3.01566e-12	1.4263e-13	4.21277e-13	0	0	0	0	0	0	0	0	0	0	0	0	0	0	0	0	0	0	0	0	0
1019.14	38	4	1	0	1	0	1	1	0	0	0	0	0	0	0	0	0	0	0	0	0	0	0	0		2.38739e-12	5.70519e-13	4.21277e-13	0	3.21934e-12	0	1.78287e-11	3.9564e-11	0	0	0	0	0	0	0	0	0	0	0	0	0	0	0	0
1020.54	52	0	2	0	1	0	0	0	1	0	0	0	0	0	0	0	0	0	0	0	0	0	0	0		3.26696e-12	0	8.42555e-13	0	3.21934e-12	0	0	0	9.37813e-11	0	0	0	0	0	0	0	0	0	0	0	0	0	0	0
1021.94	41	2	2	0	0	0	0	0	0	0	0	0	0	0	0	0	0	0	0	0	0	0	0	0		2.57587e-12	2.85259e-13	8.42555e-13	0	0	0	0	0	0	0	0	0	0	0	0	0	0	0	0	0	0	0	0	0
1023.34	44	2	2	1	0	1	0	0	0	0	0	0	0	0	0	0	0	0	0	0	0	0	0	0		2.76435e-12	2.85259e-13	8.42555e-13	1.46533e-12	0	7.19918e-12	0	0	0	0	0	0	0	0	0	0	0	0	0	0	0	0	0	0
1024.73	49	0	0	0	0	1	0	0	0	0	0	0	0	0	0	0	0	0	0	0	0	0	0	0		3.07848e-12	0	0	0	0	7.19918e-12	0	0	0	0	0	0	0	0	0	0	0	0	0	0	0	0	0	0
1026.13	48	3	1	0	1	1	0	1	0	0	0	0	0	0	0	0	0	0	0	0	0	0	0	0		3.01566e-12	4.27889e-13	4.21277e-13	0	3.21934e-12	7.19918e-12	0	3.9564e-11	0	0	0	0	0	0	0	0	0	0	0	0	0	0	0	0
1027.53	42	0	1	2	1	2	1	0	0	0	0	0	0	0	0	0	0	0	0	0	0	0	0	0		2.6387e-12	0	4.21277e-13	2.93067e-12	3.21934e-12	1.43984e-11	1.78287e-11	0	0	0	0	0	0	0	0	0	0	0	0	0	0	0	0	0
1028.93	33	2	0	0	1	0	1	0	0	0	0	0	0	0	0	0	0	0	0	0	0	0	0	0		2.07326e-12	2.85259e-13	0	0	3.21934e-12	0	1.78287e-11	0	0	0	0	0	0	0	0	0	0	0	0	0	0	0	0	0
1030.33	37	2	1	2	1	0	0	0	0	0	0	0	0	0	0	0	0	0	0	0	0	0	0	0		2.32457e-12	2.85259e-13	4.21277e-13	2.93067e-12	3.21934e-12	0	0	0	0	0	0	0	0	0	0	0	0	0	0	0	0	0	0	0
1031.72	45	2	1	0	0	0	0	0	0	0	0	0	0	0	0	0	0	0	0	0	0	0	0	0		2.82718e-12	2.85259e-13	4.21277e-13	0	0	0	0	0	0	0	0	0	0	0	0	0	0	0	0	0	0	0	0	0
1033.12	35	2	0	0	0	0	0	0	0	0	0	0	0	0	0	0	0	0	0	0	0	0	0	0		2.19892e-12	2.85259e-13	0	0	0	0	0	0	0	0	0	0	0	0	0	0	0	0	0	0	0	0	0	0
1034.52	41	0	0	0	0	0	0	1	0	0	0	0	0	0	0	0	0	0	0	0	0	0	0	0		2.57587e-12	0	0	0	0	0	0	3.9564e-11	0	0	0	0	0	0	0	0	0	0	0	0	0	0	0	0
1035.92	37	7	0	0	1	0	0	0	0	0	0	0	0	0	0	0	0	0	0	0	0	0	0	0		2.32457e-12	9.98408e-13	0	0	3.21934e-12	0	0	0	0	0	0	0	0	0	0	0	0	0	0	0	0	0	0	0
1037.32	48	0	0	0	0	1	0	0	0	0	0	0	0	0	0	0	0	0	0	0	0	0	0	0		3.01566e-12	0	0	0	0	7.19918e-12	0	0	0	0	0	0	0	0	0	0	0	0	0	0	0	0	0	0
1038.71	39	3	2	1	0	0	0	0	0	1	0	0	0	0	0	0	0	0	0	0	0	0	0	0		2.45022e-12	4.27889e-13	8.42555e-13	1.46533e-12	0	0	0	0	0	2.06038e-10	0	0	0	0	0	0	0	0	0	0	0	0	0	0
1040.11	49	3	0	1	0	0	0	0	0	0	0	0	0	0	0	0	0	0	0	0	0	0	0	0		3.07848e-12	4.27889e-13	0	1.46533e-12	0	0	0	0	0	0	0	0	0	0	0	0	0	0	0	0	0	0	0	0
1041.51	49	3	0	1	1	0	0	0	0	0	0	0	0	0	0	0	0	0	0	0	0	0	0	0		3.07848e-12	4.27889e-13	0	1.46533e-12	3.21934e-12	0	0	0	0	0	0	0	0	0	0	0	0	0	0	0	0	0	0	0
1042.91	49	1	1	1	0	2	0	0	0	0	0	0	0	0	0	0	0	0	0	0	0	0	0	0		3.07848e-12	1.4263e-13	4.21277e-13	1.46533e-12	0	1.43984e-11	0	0	0	0	0	0	0	0	0	0	0	0	0	0	0	0	0	0
1044.31	47	1	1	0	1	0	1	0	0	0	0	0	0	0	0	0	0	0	0	0	0	0	0	0		2.95283e-12	1.4263e-13	4.21277e-13	0	3.21934e-12	0	1.78287e-11	0	0	0	0	0	0	0	0	0	0	0	0	0	0	0	0	0
1045.7	51	1	1	0	0	0	0	0	0	0	0	0	0	0	0	0	0	0	0	0	0	0	0	0		3.20413e-12	1.4263e-13	4.21277e-13	0	0	0	0	0	0	0	0	0	0	0	0	0	0	0	0	0	0	0	0	0
1047.1	53	1	0	0	1	1	0	0	0	0	0	0	0	0	0	0	0	0	0	0	0	0	0	0		3.32979e-12	1.4263e-13	0	0	3.21934e-12	7.19918e-12	0	0	0	0	0	0	0	0	0	0	0	0	0	0	0	0	0	0
1048.5	57	4	2	1	1	0	0	0	0	0	0	0	0	0	0	0	0	0	0	0	0	0	0	0		3.58109e-12	5.70519e-13	8.42555e-13	1.46533e-12	3.21934e-12	0	0	0	0	0	0	0	0	0	0	0	0	0	0	0	0	0	0	0
1049.9	57	1	3	0	0	0	0	0	0	0	0	0	0	0	0	0	0	0	0	0	0	0	0	0		3.58109e-12	1.4263e-13	1.26383e-12	0	0	0	0	0	0	0	0	0	0	0	0	0	0	0	0	0	0	0	0	0
1051.3	52	3	1	0	0	1	0	0	0	0	0	0	0	0	0	0	0	0	0	0	0	0	0	0		3.26696e-12	4.27889e-13	4.21277e-13	0	0	7.19918e-12	0	0	0	0	0	0	0	0	0	0	0	0	0	0	0	0	0	0
1052.69	56	1	1	0	0	0	0	0	0	0	0	0	0	0	0	0	0	0	0	0	0	0	0	0		3.51827e-12	1.4263e-13	4.21277e-13	0	0	0	0	0	0	0	0	0	0	0	0	0	0	0	0	0	0	0	0	0
1054.09	48	3	0	0	2	0	0	0	1	0	0	0	0	0	0	0	0	0	0	0	0	0	0	0		3.01566e-12	4.27889e-13	0	0	6.43867e-12	0	0	0	9.37813e-11	0	0	0	0	0	0	0	0	0	0	0	0	0	0	0
1055.49	39	7	1	0	0	0	1	1	0	0	0	0	0	0	0	0	0	0	0	0	0	0	0	0		2.45022e-12	9.98408e-13	4.21277e-13	0	0	0	1.78287e-11	3.9564e-11	0	0	0	0	0	0	0	0	0	0	0	0	0	0	0	0
1056.89	47	1	2	0	0	1	0	0	0	0	0	0	0	0	0	0	0	0	0	0	0	0	0	0		2.95283e-12	1.4263e-13	8.42555e-13	0	0	7.19918e-12	0	0	0	0	0	0	0	0	0	0	0	0	0	0	0	0	0	0
1058.29	43	5	0	1	1	0	0	0	2	0	0	0	0	0	0	0	0	0	0	0	0	0	0	0		2.70153e-12	7.13148e-13	0	1.46533e-12	3.21934e-12	0	0	0	1.87563e-10	0	0	0	0	0	0	0	0	0	0	0	0	0	0	0
1059.68	44	0	0	0	0	1	0	0	0	0	0	0	0	0	0	0	0	0	0	0	0	0	0	0		2.76435e-12	0	0	0	0	7.19918e-12	0	0	0	0	0	0	0	0	0	0	0	0	0	0	0	0	0	0
1061.08	62	1	1	0	0	0	1	1	0	0	0	0	0	0	0	0	0	0	0	0	0	0	0	0		3.89522e-12	1.4263e-13	4.21277e-13	0	0	0	1.78287e-11	3.9564e-11	0	0	0	0	0	0	0	0	0	0	0	0	0	0	0	0
1062.48	44	1	0	1	0	1	0	0	0	0	0	0	0	0	0	0	0	0	0	0	0	0	0	0		2.76435e-12	1.4263e-13	0	1.46533e-12	0	7.19918e-12	0	0	0	0	0	0	0	0	0	0	0	0	0	0	0	0	0	0
1063.88	39	2	1	0	0	0	1	0	0	0	0	0	0	0	0	0	0	0	0	0	0	0	0	0		2.45022e-12	2.85259e-13	4.21277e-13	0	0	0	1.78287e-11	0	0	0	0	0	0	0	0	0	0	0	0	0	0	0	0	0
1065.28	38	3	0	0	0	0	0	0	0	0	0	0	0	0	0	0	0	0	0	0	0	0	0	0		2.38739e-12	4.27889e-13	0	0	0	0	0	0	0	0	0	0	0	0	0	0	0	0	0	0	0	0	0	0
1066.67	57	5	0	0	1	0	0	0	0	0	0	0	0	0	0	0	0	0	0	0	0	0	0	0		3.58109e-12	7.13148e-13	0	0	3.21934e-12	0	0	0	0	0	0	0	0	0	0	0	0	0	0	0	0	0	0	0
1068.07	41	4	3	0	1	1	0	0	0	0	0	0	0	0	0	0	0	0	0	0	0	0	0	0		2.57587e-12	5.70519e-13	1.26383e-12	0	3.21934e-12	7.19918e-12	0	0	0	0	0	0	0	0	0	0	0	0	0	0	0	0	0	0
1069.47	47	3	0	0	2	0	0	0	0	0	0	0	0	0	0	0	0	0	0	0	0	0	0	0		2.95283e-12	4.27889e-13	0	0	6.43867e-12	0	0	0	0	0	0	0	0	0	0	0	0	0	0	0	0	0	0	0
1070.87	37	3	0	0	0	0	0	0	0	0	0	0	0	0	0	0	0	0	0	0	0	0	0	0		2.32457e-12	4.27889e-13	0	0	0	0	0	0	0	0	0	0	0	0	0	0	0	0	0	0	0	0	0	0
1072.27	46	0	0	0	1	0	0	0	1	0	0	0	0	0	0	0	0	0	0	0	0	0	0	0		2.89e-12	0	0	0	3.21934e-12	0	0	0	9.37813e-11	0	0	0	0	0	0	0	0	0	0	0	0	0	0	0
1073.66	48	3	1	0	2	0	0	0	0	0	0	0	0	0	0	0	0	0	0	0	0	0	0	0		3.01566e-12	4.27889e-13	4.21277e-13	0	6.43867e-12	0	0	0	0	0	0	0	0	0	0	0	0	0	0	0	0	0	0	0
1075.06	53	3	2	0	0	0	0	0	0	0	0	0	0	0	0	0	0	0	0	0	0	0	0	0		3.32979e-12	4.27889e-13	8.42555e-13	0	0	0	0	0	0	0	0	0	0	0	0	0	0	0	0	0	0	0	0	0
1076.46	54	1	0	1	2	0	0	1	0	0	0	0	0	0	0	0	0	0	0	0	0	0	0	0		3.39261e-12	1.4263e-13	0	1.46533e-12	6.43867e-12	0	0	3.9564e-11	0	0	0	0	0	0	0	0	0	0	0	0	0	0	0	0
1077.86	49	3	2	1	0	2	0	0	0	0	0	0	0	0	0	0	0	0	0	0	0	0	0	0		3.07848e-12	4.27889e-13	8.42555e-13	1.46533e-12	0	1.43984e-11	0	0	0	0	0	0	0	0	0	0	0	0	0	0	0	0	0	0
1079.26	39	1	0	0	0	0	0	0	0	0	0	0	0	0	0	0	0	0	0	0	0	0	0	0		2.45022e-12	1.4263e-13	0	0	0	0	0	0	0	0	0	0	0	0	0	0	0	0	0	0	0	0	0	0
1080.65	51	5	1	0	0	1	0	0	0	0	0	0	0	0	0	0	0	0	0	0	0	0	0	0		3.20413e-12	7.13148e-13	4.21277e-13	0	0	7.19918e-12	0	0	0	0	0	0	0	0	0	0	0	0	0	0	0	0	0	0
1082.05	40	3	3	0	0	0	0	0	0	0	0	0	0	0	0	0	0	0	0	0	0	0	0	0		2.51305e-12	4.27889e-13	1.26383e-12	0	0	0	0	0	0	0	0	0	0	0	0	0	0	0	0	0	0	0	0	0
1083.45	31	3	0	0	0	0	0	0	0	0	0	0	0	0	0	0	0	0	0	0	0	0	0	0		1.94761e-12	4.27889e-13	0	0	0	0	0	0	0	0	0	0	0	0	0	0	0	0	0	0	0	0	0	0
1084.85	45	3	1	0	0	1	0	0	0	0	0	0	0	0	0	0	0	0	0	0	0	0	0	0		2.82718e-12	4.27889e-13	4.21277e-13	0	0	7.19918e-12	0	0	0	0	0	0	0	0	0	0	0	0	0	0	0	0	0	0
1086.25	37	1	1	2	1	0	0	0	0	0	0	0	0	0	0	0	0	0	0	0	0	0	0	0		2.32457e-12	1.4263e-13	4.21277e-13	2.93067e-12	3.21934e-12	0	0	0	0	0	0	0	0	0	0	0	0	0	0	0	0	0	0	0
1087.64	45	4	0	0	0	0	0	0	0	0	0	0	0	0	0	0	0	0	0	0	0	0	0	0		2.82718e-12	5.70519e-13	0	0	0	0	0	0	0	0	0	0	0	0	0	0	0	0	0	0	0	0	0	0
1089.04	50	3	1	0	0	0	0	0	0	0	0	0	0	0	0	0	0	0	0	0	0	0	0	0		3.14131e-12	4.27889e-13	4.21277e-13	0	0	0	0	0	0	0	0	0	0	0	0	0	0	0	0	0	0	0	0	0
1090.44	48	0	2	0	0	0	0	0	0	1	0	0	0	0	0	0	0	0	0	0	0	0	0	0		3.01566e-12	0	8.42555e-13	0	0	0	0	0	0	2.06038e-10	0	0	0	0	0	0	0	0	0	0	0	0	0	0
1091.84	45	1	2	3	0	0	0	1	0	0	0	0	0	0	0	0	0	0	0	0	0	0	0	0		2.82718e-12	1.4263e-13	8.42555e-13	4.396e-12	0	0	0	3.9564e-11	0	0	0	0	0	0	0	0	0	0	0	0	0	0	0	0
1093.24	40	1	1	0	0	1	0	0	0	0	0	0	0	0	0	0	0	0	0	0	0	0	0	0		2.51305e-12	1.4263e-13	4.21277e-13	0	0	7.19918e-12	0	0	0	0	0	0	0	0	0	0	0	0	0	0	0	0	0	0
1094.63	44	3	1	0	0	1	0	0	0	0	0	0	0	0	0	0	0	0	0	0	0	0	0	0		2.76435e-12	4.27889e-13	4.21277e-13	0	0	7.19918e-12	0	0	0	0	0	0	0	0	0	0	0	0	0	0	0	0	0	0
1096.03	48	3	0	0	1	0	0	0	0	0	0	0	0	0	0	0	0	0	0	0	0	0	0	0		3.01566e-12	4.27889e-13	0	0	3.21934e-12	0	0	0	0	0	0	0	0	0	0	0	0	0	0	0	0	0	0	0
1097.43	43	1	3	1	1	2	0	0	0	0	0	0	0	0	0	0	0	0	0	0	0	0	0	0		2.70153e-12	1.4263e-13	1.26383e-12	1.46533e-12	3.21934e-12	1.43984e-11	0	0	0	0	0	0	0	0	0	0	0	0	0	0	0	0	0	0
1098.83	48	2	1	0	1	0	0	0	0	0	0	0	0	0	0	0	0	0	0	0	0	0	0	0		3.01566e-12	2.85259e-13	4.21277e-13	0	3.21934e-12	0	0	0	0	0	0	0	0	0	0	0	0	0	0	0	0	0	0	0
1100.23	42	3	3	0	0	1	1	0	0	0	0	0	0	0	0	0	0	0	0	0	0	0	0	0		2.6387e-12	4.27889e-13	1.26383e-12	0	0	7.19918e-12	1.78287e-11	0	0	0	0	0	0	0	0	0	0	0	0	0	0	0	0	0
1101.62	43	2	1	0	1	0	0	0	0	0	0	0	0	0	0	0	0	0	0	0	0	0	0	0		2.70153e-12	2.85259e-13	4.21277e-13	0	3.21934e-12	0	0	0	0	0	0	0	0	0	0	0	0	0	0	0	0	0	0	0
1103.02	39	4	2	0	0	1	1	0	0	0	0	0	0	0	0	0	0	0	0	0	0	0	0	0		2.45022e-12	5.70519e-13	8.42555e-13	0	0	7.19918e-12	1.78287e-11	0	0	0	0	0	0	0	0	0	0	0	0	0	0	0	0	0
1104.42	49	0	0	0	1	0	0	0	0	0	0	0	0	0	0	0	0	0	0	0	0	0	0	0		3.07848e-12	0	0	0	3.21934e-12	0	0	0	0	0	0	0	0	0	0	0	0	0	0	0	0	0	0	0
1105.82	53	2	1	0	1	0	1	0	0	0	0	0	0	0	0	0	0	0	0	0	0	0	0	0		3.32979e-12	2.85259e-13	4.21277e-13	0	3.21934e-12	0	1.78287e-11	0	0	0	0	0	0	0	0	0	0	0	0	0	0	0	0	0
1107.22	47	1	1	0	0	0	1	0	0	0	0	0	0	0	0	0	0	0	0	0	0	0	0	0		2.95283e-12	1.4263e-13	4.21277e-13	0	0	0	1.78287e-11	0	0	0	0	0	0	0	0	0	0	0	0	0	0	0	0	0
1108.61	31	2	2	1	0	0	0	0	0	0	0	0	0	0	0	0	0	0	0	0	0	0	0	0		1.94761e-12	2.85259e-13	8.42555e-13	1.46533e-12	0	0	0	0	0	0	0	0	0	0	0	0	0	0	0	0	0	0	0	0
1110.01	31	1	1	0	0	1	0	0	0	0	0	0	0	0	0	0	0	0	0	0	0	0	0	0		1.94761e-12	1.4263e-13	4.21277e-13	0	0	7.19918e-12	0	0	0	0	0	0	0	0	0	0	0	0	0	0	0	0	0	0
1111.41	34	0	1	1	1	0	0	0	0	0	0	0	0	0	0	0	0	0	0	0	0	0	0	0		2.13609e-12	0	4.21277e-13	1.46533e-12	3.21934e-12	0	0	0	0	0	0	0	0	0	0	0	0	0	0	0	0	0	0	0
1112.81	44	3	1	0	0	0	0	0	0	0	0	0	0	0	0	0	0	0	0	0	0	0	0	0		2.76435e-12	4.27889e-13	4.21277e-13	0	0	0	0	0	0	0	0	0	0	0	0	0	0	0	0	0	0	0	0	0
1114.21	49	3	0	0	0	2	0	0	0	0	0	0	0	0	0	0	0	0	0	0	0	0	0	0		3.07848e-12	4.27889e-13	0	0	0	1.43984e-11	0	0	0	0	0	0	0	0	0	0	0	0	0	0	0	0	0	0
1115.6	54	0	1	0	0	0	0	0	0	0	0	0	0	0	0	0	0	0	0	0	0	0	0	0		3.39261e-12	0	4.21277e-13	0	0	0	0	0	0	0	0	0	0	0	0	0	0	0	0	0	0	0	0	0
1117	42	3	1	0	3	2	0	0	0	0	0	0	0	0	0	0	0	0	0	0	0	0	0	0		2.6387e-12	4.27889e-13	4.21277e-13	0	9.65801e-12	1.43984e-11	0	0	0	0	0	0	0	0	0	0	0	0	0	0	0	0	0	0
1118.4	38	2	0	0	0	1	0	0	0	0	0	0	0	0	0	0	0	0	0	0	0	0	0	0		2.38739e-12	2.85259e-13	0	0	0	7.19918e-12	0	0	0	0	0	0	0	0	0	0	0	0	0	0	0	0	0	0
1119.8	37	0	0	0	0	0	0	0	0	0	0	0	0	0	0	0	0	0	0	0	0	0	0	0		2.32457e-12	0	0	0	0	0	0	0	0	0	0	0	0	0	0	0	0	0	0	0	0	0	0	0
1121.2	46	2	1	0	0	1	2	0	0	0	0	0	0	0	0	0	0	0	0	0	0	0	0	0		2.89e-12	2.85259e-13	4.21277e-13	0	0	7.19918e-12	3.56574e-11	0	0	0	0	0	0	0	0	0	0	0	0	0	0	0	0	0
1122.59	56	3	0	1	1	1	0	0	0	0	0	0	0	0	0	0	0	0	0	0	0	0	0	0		3.51827e-12	4.27889e-13	0	1.46533e-12	3.21934e-12	7.19918e-12	0	0	0	0	0	0	0	0	0	0	0	0	0	0	0	0	0	0
1123.99	44	1	2	1	0	0	0	0	0	0	0	0	0	0	0	0	0	0	0	0	0	0	0	0		2.76435e-12	1.4263e-13	8.42555e-13	1.46533e-12	0	0	0	0	0	0	0	0	0	0	0	0	0	0	0	0	0	0	0	0
1125.39	46	2	3	0	0	0	0	0	0	0	0	0	0	0	0	0	0	0	0	0	0	0	0	0		2.89e-12	2.85259e-13	1.26383e-12	0	0	0	0	0	0	0	0	0	0	0	0	0	0	0	0	0	0	0	0	0
1126.79	42	4	1	1	0	0	1	0	0	0	0	0	0	0	0	0	0	0	0	0	0	0	0	0		2.6387e-12	5.70519e-13	4.21277e-13	1.46533e-12	0	0	1.78287e-11	0	0	0	0	0	0	0	0	0	0	0	0	0	0	0	0	0
1128.19	35	2	1	0	0	1	0	0	0	0	0	0	0	0	0	0	0	0	0	0	0	0	0	0		2.19892e-12	2.85259e-13	4.21277e-13	0	0	7.19918e-12	0	0	0	0	0	0	0	0	0	0	0	0	0	0	0	0	0	0
1129.58	42	1	0	0	0	1	0	0	0	0	0	0	0	0	0	0	0	0	0	0	0	0	0	0		2.6387e-12	1.4263e-13	0	0	0	7.19918e-12	0	0	0	0	0	0	0	0	0	0	0	0	0	0	0	0	0	0
1130.98	35	3	1	0	1	0	0	0	0	0	0	0	0	0	0	0	0	0	0	0	0	0	0	0		2.19892e-12	4.27889e-13	4.21277e-13	0	3.21934e-12	0	0	0	0	0	0	0	0	0	0	0	0	0	0	0	0	0	0	0
1132.38	31	4	4	0	0	1	0	0	0	0	0	0	0	0	0	0	0	0	0	0	0	0	0	0		1.94761e-12	5.70519e-13	1.68511e-12	0	0	7.19918e-12	0	0	0	0	0	0	0	0	0	0	0	0	0	0	0	0	0	0
1133.78	37	0	0	0	1	0	0	0	0	0	0	0	0	0	0	0	0	0	0	0	0	0	0	0		2.32457e-12	0	0	0	3.21934e-12	0	0	0	0	0	0	0	0	0	0	0	0	0	0	0	0	0	0	0
1135.18	32	3	1	0	0	1	0	0	0	0	0	0	0	0	0	0	0	0	0	0	0	0	0	0		2.01044e-12	4.27889e-13	4.21277e-13	0	0	7.19918e-12	0	0	0	0	0	0	0	0	0	0	0	0	0	0	0	0	0	0
1136.57	37	1	2	1	0	0	0	0	0	0	0	0	0	0	0	0	0	0	0	0	0	0	0	0		2.32457e-12	1.4263e-13	8.42555e-13	1.46533e-12	0	0	0	0	0	0	0	0	0	0	0	0	0	0	0	0	0	0	0	0
1137.97	30	1	0	0	1	0	0	0	0	0	0	0	0	0	0	0	0	0	0	0	0	0	0	0		1.88478e-12	1.4263e-13	0	0	3.21934e-12	0	0	0	0	0	0	0	0	0	0	0	0	0	0	0	0	0	0	0
1139.37	45	2	2	2	0	0	0	0	0	0	0	0	0	0	0	0	0	0	0	0	0	0	0	0		2.82718e-12	2.85259e-13	8.42555e-13	2.93067e-12	0	0	0	0	0	0	0	0	0	0	0	0	0	0	0	0	0	0	0	0
1140.77	39	1	0	0	0	0	0	0	0	0	0	0	0	0	0	0	0	0	0	0	0	0	0	0		2.45022e-12	1.4263e-13	0	0	0	0	0	0	0	0	0	0	0	0	0	0	0	0	0	0	0	0	0	0
1142.17	40	3	2	0	0	0	0	0	0	0	0	0	0	0	0	0	0	0	0	0	0	0	0	0		2.51305e-12	4.27889e-13	8.42555e-13	0	0	0	0	0	0	0	0	0	0	0	0	0	0	0	0	0	0	0	0	0
1143.56	32	3	0	0	1	0	0	0	0	0	0	0	0	0	0	0	0	0	0	0	0	0	0	0		2.01044e-12	4.27889e-13	0	0	3.21934e-12	0	0	0	0	0	0	0	0	0	0	0	0	0	0	0	0	0	0	0
1144.96	35	1	1	0	0	2	1	0	0	0	0	0	0	0	0	0	0	0	0	0	0	0	0	0		2.19892e-12	1.4263e-13	4.21277e-13	0	0	1.43984e-11	1.78287e-11	0	0	0	0	0	0	0	0	0	0	0	0	0	0	0	0	0
1146.36	26	3	0	0	0	0	0	0	0	0	0	0	0	0	0	0	0	0	0	0	0	0	0	0		1.63348e-12	4.27889e-13	0	0	0	0	0	0	0	0	0	0	0	0	0	0	0	0	0	0	0	0	0	0
1147.76	34	0	0	0	0	1	0	0	0	0	0	0	0	0	0	0	0	0	0	0	0	0	0	0		2.13609e-12	0	0	0	0	7.19918e-12	0	0	0	0	0	0	0	0	0	0	0	0	0	0	0	0	0	0
1149.16	36	4	0	1	0	0	1	0	0	0	0	0	0	0	0	0	0	0	0	0	0	0	0	0		2.26174e-12	5.70519e-13	0	1.46533e-12	0	0	1.78287e-11	0	0	0	0	0	0	0	0	0	0	0	0	0	0	0	0	0
1150.55	40	3	0	0	1	0	0	0	0	0	0	0	0	0	0	0	0	0	0	0	0	0	0	0		2.51305e-12	4.27889e-13	0	0	3.21934e-12	0	0	0	0	0	0	0	0	0	0	0	0	0	0	0	0	0	0	0
1151.95	35	1	1	0	0	1	0	0	0	0	0	0	0	0	0	0	0	0	0	0	0	0	0	0		2.19892e-12	1.4263e-13	4.21277e-13	0	0	7.19918e-12	0	0	0	0	0	0	0	0	0	0	0	0	0	0	0	0	0	0
1153.35	39	1	0	0	0	0	0	0	0	0	0	0	0	0	0	0	0	0	0	0	0	0	0	0		2.45022e-12	1.4263e-13	0	0	0	0	0	0	0	0	0	0	0	0	0	0	0	0	0	0	0	0	0	0
1154.75	50	5	2	0	0	2	0	0	0	0	0	0	0	0	0	0	0	0	0	0	0	0	0	0		3.14131e-12	7.13148e-13	8.42555e-13	0	0	1.43984e-11	0	0	0	0	0	0	0	0	0	0	0	0	0	0	0	0	0	0
1156.15	33	2	1	1	0	0	0	1	0	0	0	0	0	0	0	0	0	0	0	0	0	0	0	0		2.07326e-12	2.85259e-13	4.21277e-13	1.46533e-12	0	0	0	3.9564e-11	0	0	0	0	0	0	0	0	0	0	0	0	0	0	0	0
1157.54	39	1	0	0	0	1	2	0	0	0	0	0	0	0	0	0	0	0	0	0	0	0	0	0		2.45022e-12	1.4263e-13	0	0	0	7.19918e-12	3.56574e-11	0	0	0	0	0	0	0	0	0	0	0	0	0	0	0	0	0
1158.94	32	3	0	0	1	0	0	0	0	0	0	0	0	0	0	0	0	0	0	0	0	0	0	0		2.01044e-12	4.27889e-13	0	0	3.21934e-12	0	0	0	0	0	0	0	0	0	0	0	0	0	0	0	0	0	0	0
1160.34	28	0	0	1	0	0	0	0	0	0	0	0	0	0	0	0	0	0	0	0	0	0	0	0		1.75913e-12	0	0	1.46533e-12	0	0	0	0	0	0	0	0	0	0	0	0	0	0	0	0	0	0	0	0
1161.74	37	2	0	0	0	1	0	0	0	0	0	0	0	0	0	0	0	0	0	0	0	0	0	0		2.32457e-12	2.85259e-13	0	0	0	7.19918e-12	0	0	0	0	0	0	0	0	0	0	0	0	0	0	0	0	0	0
1163.14	39	3	1	0	0	0	0	0	0	0	0	0	0	0	0	0	0	0	0	0	0	0	0	0		2.45022e-12	4.27889e-13	4.21277e-13	0	0	0	0	0	0	0	0	0	0	0	0	0	0	0	0	0	0	0	0	0
1164.53	31	1	0	0	0	0	0	0	0	0	0	0	0	0	0	0	0	0	0	0	0	0	0	0		1.94761e-12	1.4263e-13	0	0	0	0	0	0	0	0	0	0	0	0	0	0	0	0	0	0	0	0	0	0
1165.93	31	2	1	0	0	0	0	0	1	0	0	0	0	0	0	0	0	0	0	0	0	0	0	0		1.94761e-12	2.85259e-13	4.21277e-13	0	0	0	0	0	9.37813e-11	0	0	0	0	0	0	0	0	0	0	0	0	0	0	0
1167.33	37	3	0	0	0	0	0	0	0	0	0	0	0	0	0	0	0	0	0	0	0	0	0	0		2.32457e-12	4.27889e-13	0	0	0	0	0	0	0	0	0	0	0	0	0	0	0	0	0	0	0	0	0	0
1168.73	45	2	1	0	1	0	0	0	0	0	0	0	0	0	0	0	0	0	0	0	0	0	0	0		2.82718e-12	2.85259e-13	4.21277e-13	0	3.21934e-12	0	0	0	0	0	0	0	0	0	0	0	0	0	0	0	0	0	0	0
1170.13	43	2	1	0	0	0	0	0	0	0	0	0	0	0	0	0	0	0	0	0	0	0	0	0		2.70153e-12	2.85259e-13	4.21277e-13	0	0	0	0	0	0	0	0	0	0	0	0	0	0	0	0	0	0	0	0	0
1171.52	35	6	1	0	1	0	0	0	0	0	0	0	0	0	0	0	0	0	0	0	0	0	0	0		2.19892e-12	8.55778e-13	4.21277e-13	0	3.21934e-12	0	0	0	0	0	0	0	0	0	0	0	0	0	0	0	0	0	0	0
1172.92	36	2	1	0	1	0	0	0	0	0	0	0	0	0	0	0	0	0	0	0	0	0	0	0		2.26174e-12	2.85259e-13	4.21277e-13	0	3.21934e-12	0	0	0	0	0	0	0	0	0	0	0	0	0	0	0	0	0	0	0
1174.32	35	3	1	0	1	0	0	0	0	0	0	0	0	0	0	0	0	0	0	0	0	0	0	0		2.19892e-12	4.27889e-13	4.21277e-13	0	3.21934e-12	0	0	0	0	0	0	0	0	0	0	0	0	0	0	0	0	0	0	0
1175.72	34	0	0	1	0	0	0	0	0	0	0	0	0	0	0	0	0	0	0	0	0	0	0	0		2.13609e-12	0	0	1.46533e-12	0	0	0	0	0	0	0	0	0	0	0	0	0	0	0	0	0	0	0	0
1177.12	33	1	1	0	0	0	0	0	0	0	0	0	0	0	0	0	0	0	0	0	0	0	0	0		2.07326e-12	1.4263e-13	4.21277e-13	0	0	0	0	0	0	0	0	0	0	0	0	0	0	0	0	0	0	0	0	0
1178.51	32	2	1	1	1	1	0	0	0	0	0	0	0	0	0	0	0	0	0	0	0	0	0	0		2.01044e-12	2.85259e-13	4.21277e-13	1.46533e-12	3.21934e-12	7.19918e-12	0	0	0	0	0	0	0	0	0	0	0	0	0	0	0	0	0	0
1179.91	38	1	0	0	1	1	0	0	0	0	0	0	0	0	0	0	0	0	0	0	0	0	0	0		2.38739e-12	1.4263e-13	0	0	3.21934e-12	7.19918e-12	0	0	0	0	0	0	0	0	0	0	0	0	0	0	0	0	0	0
1181.31	43	5	3	0	0	0	0	0	0	0	0	0	0	0	0	0	0	0	0	0	0	0	0	0		2.70153e-12	7.13148e-13	1.26383e-12	0	0	0	0	0	0	0	0	0	0	0	0	0	0	0	0	0	0	0	0	0
1182.71	41	4	1	1	1	1	0	0	0	0	0	0	0	0	0	0	0	0	0	0	0	0	0	0		2.57587e-12	5.70519e-13	4.21277e-13	1.46533e-12	3.21934e-12	7.19918e-12	0	0	0	0	0	0	0	0	0	0	0	0	0	0	0	0	0	0
1184.11	39	0	0	0	0	1	0	0	0	0	0	0	0	0	0	0	0	0	0	0	0	0	0	0		2.45022e-12	0	0	0	0	7.19918e-12	0	0	0	0	0	0	0	0	0	0	0	0	0	0	0	0	0	0
1185.5	52	5	1	0	0	1	0	0	0	0	0	0	0	0	0	0	0	0	0	0	0	0	0	0		3.26696e-12	7.13148e-13	4.21277e-13	0	0	7.19918e-12	0	0	0	0	0	0	0	0	0	0	0	0	0	0	0	0	0	0
1186.9	38	1	1	0	0	1	0	0	0	0	0	0	0	0	0	0	0	0	0	0	0	0	0	0		2.38739e-12	1.4263e-13	4.21277e-13	0	0	7.19918e-12	0	0	0	0	0	0	0	0	0	0	0	0	0	0	0	0	0	0
1188.3	39	3	0	0	0	0	0	1	0	0	0	0	0	0	0	0	0	0	0	0	0	0	0	0		2.45022e-12	4.27889e-13	0	0	0	0	0	3.9564e-11	0	0	0	0	0	0	0	0	0	0	0	0	0	0	0	0
1189.7	35	4	1	1	1	0	0	0	0	0	0	0	0	0	0	0	0	0	0	0	0	0	0	0		2.19892e-12	5.70519e-13	4.21277e-13	1.46533e-12	3.21934e-12	0	0	0	0	0	0	0	0	0	0	0	0	0	0	0	0	0	0	0
1191.1	52	0	2	0	0	0	0	0	0	0	0	0	0	0	0	0	0	0	0	0	0	0	0	0		3.26696e-12	0	8.42555e-13	0	0	0	0	0	0	0	0	0	0	0	0	0	0	0	0	0	0	0	0	0
1192.49	42	4	2	1	0	0	0	0	1	0	0	0	0	0	0	0	0	0	0	0	0	0	0	0		2.6387e-12	5.70519e-13	8.42555e-13	1.46533e-12	0	0	0	0	9.37813e-11	0	0	0	0	0	0	0	0	0	0	0	0	0	0	0
1193.89	47	2	1	0	1	2	1	0	0	0	0	0	0	0	0	0	0	0	0	0	0	0	0	0		2.95283e-12	2.85259e-13	4.21277e-13	0	3.21934e-12	1.43984e-11	1.78287e-11	0	0	0	0	0	0	0	0	0	0	0	0	0	0	0	0	0
1195.29	48	0	2	0	0	0	0	0	1	0	0	0	0	0	0	0	0	0	0	0	0	0	0	0		3.01566e-12	0	8.42555e-13	0	0	0	0	0	9.37813e-11	0	0	0	0	0	0	0	0	0	0	0	0	0	0	0
1196.69	59	5	0	0	0	0	0	0	0	1	0	0	0	0	0	0	0	0	0	0	0	0	0	0		3.70674e-12	7.13148e-13	0	0	0	0	0	0	0	2.06038e-10	0	0	0	0	0	0	0	0	0	0	0	0	0	0
1198.09	46	2	1	0	0	0	0	0	0	0	0	0	0	0	0	0	0	0	0	0	0	0	0	0		2.89e-12	2.85259e-13	4.21277e-13	0	0	0	0	0	0	0	0	0	0	0	0	0	0	0	0	0	0	0	0	0
1199.48	41	3	0	0	2	0	0	0	0	0	0	0	0	0	0	0	0	0	0	0	0	0	0	0		2.57587e-12	4.27889e-13	0	0	6.43867e-12	0	0	0	0	0	0	0	0	0	0	0	0	0	0	0	0	0	0	0
1200.88	34	3	2	0	1	0	0	0	0	0	0	0	0	0	0	0	0	0	0	0	0	0	0	0		2.13609e-12	4.27889e-13	8.42555e-13	0	3.21934e-12	0	0	0	0	0	0	0	0	0	0	0	0	0	0	0	0	0	0	0
1202.28	47	4	0	0	0	1	0	0	0	0	0	0	0	0	0	0	0	0	0	0	0	0	0	0		2.95283e-12	5.70519e-13	0	0	0	7.19918e-12	0	0	0	0	0	0	0	0	0	0	0	0	0	0	0	0	0	0
1203.68	48	4	0	0	0	0	0	1	0	0	0	0	0	0	0	0	0	0	0	0	0	0	0	0		3.01566e-12	5.70519e-13	0	0	0	0	0	3.9564e-11	0	0	0	0	0	0	0	0	0	0	0	0	0	0	0	0
1205.08	38	1	1	0	1	0	0	0	0	0	0	0	0	0	0	0	0	0	0	0	0	0	0	0		2.38739e-12	1.4263e-13	4.21277e-13	0	3.21934e-12	0	0	0	0	0	0	0	0	0	0	0	0	0	0	0	0	0	0	0
1206.47	52	2	0	0	0	0	0	0	0	0	0	0	0	0	0	0	0	0	0	0	0	0	0	0		3.26696e-12	2.85259e-13	0	0	0	0	0	0	0	0	0	0	0	0	0	0	0	0	0	0	0	0	0	0
1207.87	43	2	3	0	0	0	0	1	0	0	0	0	0	0	0	0	0	0	0	0	0	0	0	0		2.70153e-12	2.85259e-13	1.26383e-12	0	0	0	0	3.9564e-11	0	0	0	0	0	0	0	0	0	0	0	0	0	0	0	0
1209.27	39	3	2	0	0	1	0	0	0	0	0	0	0	0	0	0	0	0	0	0	0	0	0	0		2.45022e-12	4.27889e-13	8.42555e-13	0	0	7.19918e-12	0	0	0	0	0	0	0	0	0	0	0	0	0	0	0	0	0	0
1210.67	50	0	0	0	0	0	0	0	0	0	0	0	0	0	0	0	0	0	0	0	0	0	0	0		3.14131e-12	0	0	0	0	0	0	0	0	0	0	0	0	0	0	0	0	0	0	0	0	0	0	0
1212.07	43	0	0	0	0	0	0	0	0	0	0	0	0	0	0	0	0	0	0	0	0	0	0	0		2.70153e-12	0	0	0	0	0	0	0	0	0	0	0	0	0	0	0	0	0	0	0	0	0	0	0
1213.46	55	1	0	0	2	2	1	0	0	0	0	0	0	0	0	0	0	0	0	0	0	0	0	0		3.45544e-12	1.4263e-13	0	0	6.43867e-12	1.43984e-11	1.78287e-11	0	0	0	0	0	0	0	0	0	0	0	0	0	0	0	0	0
1214.86	28	4	0	0	0	1	0	0	0	0	0	1	0	0	0	0	0	0	0	0	0	0	0	0		1.75913e-12	5.70519e-13	0	0	0	7.19918e-12	0	0	0	0	0	7.50251e-10	0	0	0	0	0	0	0	0	0	0	0	0
1216.26	41	2	0	0	0	0	1	0	0	0	0	0	0	0	0	0	0	0	0	0	0	0	0	0		2.57587e-12	2.85259e-13	0	0	0	0	1.78287e-11	0	0	0	0	0	0	0	0	0	0	0	0	0	0	0	0	0
1217.66	33	3	1	1	2	0	0	0	0	0	0	0	0	0	0	0	0	0	0	0	0	0	0	0		2.07326e-12	4.27889e-13	4.21277e-13	1.46533e-12	6.43867e-12	0	0	0	0	0	0	0	0	0	0	0	0	0	0	0	0	0	0	0
1219.06	56	4	0	0	2	1	1	0	0	0	0	0	0	0	0	0	0	0	0	0	0	0	0	0		3.51827e-12	5.70519e-13	0	0	6.43867e-12	7.19918e-12	1.78287e-11	0	0	0	0	0	0	0	0	0	0	0	0	0	0	0	0	0
1220.45	48	1	1	0	0	0	1	0	0	0	0	0	0	0	0	0	0	0	0	0	0	0	0	0		3.01566e-12	1.4263e-13	4.21277e-13	0	0	0	1.78287e-11	0	0	0	0	0	0	0	0	0	0	0	0	0	0	0	0	0
1221.85	55	4	0	0	0	0	0	0	0	0	0	0	0	0	0	0	0	0	0	0	0	0	0	0		3.45544e-12	5.70519e-13	0	0	0	0	0	0	0	0	0	0	0	0	0	0	0	0	0	0	0	0	0	0
1223.25	51	1	2	0	2	0	0	0	1	0	0	0	0	0	0	0	0	0	0	0	0	0	0	0		3.20413e-12	1.4263e-13	8.42555e-13	0	6.43867e-12	0	0	0	9.37813e-11	0	0	0	0	0	0	0	0	0	0	0	0	0	0	0
1224.65	29	1	1	0	1	0	0	0	0	0	0	0	0	0	0	0	0	0	0	0	0	0	0	0		1.82196e-12	1.4263e-13	4.21277e-13	0	3.21934e-12	0	0	0	0	0	0	0	0	0	0	0	0	0	0	0	0	0	0	0
1226.05	40	3	0	0	1	0	1	0	0	0	0	0	0	0	0	0	0	0	0	0	0	0	0	0		2.51305e-12	4.27889e-13	0	0	3.21934e-12	0	1.78287e-11	0	0	0	0	0	0	0	0	0	0	0	0	0	0	0	0	0
1227.44	51	2	1	0	0	0	0	0	0	0	0	0	0	0	0	0	0	0	0	0	0	0	0	0		3.20413e-12	2.85259e-13	4.21277e-13	0	0	0	0	0	0	0	0	0	0	0	0	0	0	0	0	0	0	0	0	0
1228.84	24	2	1	0	0	0	0	0	0	0	0	0	0	0	0	0	0	0	0	0	0	0	0	0		1.50783e-12	2.85259e-13	4.21277e-13	0	0	0	0	0	0	0	0	0	0	0	0	0	0	0	0	0	0	0	0	0
1230.24	35	2	1	0	1	0	0	0	0	0	0	0	0	0	0	0	0	0	0	0	0	0	0	0		2.19892e-12	2.85259e-13	4.21277e-13	0	3.21934e-12	0	0	0	0	0	0	0	0	0	0	0	0	0	0	0	0	0	0	0
1231.64	31	4	0	0	0	1	0	0	0	0	0	0	0	0	0	0	0	0	0	0	0	0	0	0		1.94761e-12	5.70519e-13	0	0	0	7.19918e-12	0	0	0	0	0	0	0	0	0	0	0	0	0	0	0	0	0	0
1233.04	51	1	1	0	0	1	1	0	0	0	0	0	0	0	0	0	0	0	0	0	0	0	0	0		3.20413e-12	1.4263e-13	4.21277e-13	0	0	7.19918e-12	1.78287e-11	0	0	0	0	0	0	0	0	0	0	0	0	0	0	0	0	0
1234.43	33	1	2	0	0	1	0	0	0	0	0	0	0	0	0	0	0	0	0	0	0	0	0	0		2.07326e-12	1.4263e-13	8.42555e-13	0	0	7.19918e-12	0	0	0	0	0	0	0	0	0	0	0	0	0	0	0	0	0	0
1235.83	30	1	1	1	0	1	0	0	0	0	0	0	0	0	0	0	0	0	0	0	0	0	0	0		1.88478e-12	1.4263e-13	4.21277e-13	1.46533e-12	0	7.19918e-12	0	0	0	0	0	0	0	0	0	0	0	0	0	0	0	0	0	0
1237.23	32	1	1	1	0	0	1	0	0	0	0	0	0	0	0	0	0	0	0	0	0	0	0	0		2.01044e-12	1.4263e-13	4.21277e-13	1.46533e-12	0	0	1.78287e-11	0	0	0	0	0	0	0	0	0	0	0	0	0	0	0	0	0
1238.63	35	4	0	0	1	0	0	0	0	0	0	0	0	0	0	0	0	0	0	0	0	0	0	0		2.19892e-12	5.70519e-13	0	0	3.21934e-12	0	0	0	0	0	0	0	0	0	0	0	0	0	0	0	0	0	0	0
1240.03	27	1	1	0	1	0	0	0	0	0	0	0	0	0	0	0	0	0	0	0	0	0	0	0		1.69631e-12	1.4263e-13	4.21277e-13	0	3.21934e-12	0	0	0	0	0	0	0	0	0	0	0	0	0	0	0	0	0	0	0
1241.42	46	0	2	1	0	1	0	0	0	0	0	0	0	0	0	0	0	0	0	0	0	0	0	0		2.89e-12	0	8.42555e-13	1.46533e-12	0	7.19918e-12	0	0	0	0	0	0	0	0	0	0	0	0	0	0	0	0	0	0
1242.82	27	4	1	0	0	0	1	0	1	0	0	0	0	0	0	0	0	0	0	0	0	0	0	0		1.69631e-12	5.70519e-13	4.21277e-13	0	0	0	1.78287e-11	0	9.37813e-11	0	0	0	0	0	0	0	0	0	0	0	0	0	0	0
1244.22	28	1	0	0	2	0	0	0	0	0	0	0	0	0	0	0	0	0	0	0	0	0	0	0		1.75913e-12	1.4263e-13	0	0	6.43867e-12	0	0	0	0	0	0	0	0	0	0	0	0	0	0	0	0	0	0	0
1245.62	37	2	0	2	1	0	1	0	0	0	0	0	0	0	0	0	0	0	0	0	0	0	0	0		2.32457e-12	2.85259e-13	0	2.93067e-12	3.21934e-12	0	1.78287e-11	0	0	0	0	0	0	0	0	0	0	0	0	0	0	0	0	0
1247.02	24	1	1	0	0	0	0	0	0	0	0	0	0	0	0	0	0	0	0	0	0	0	0	0		1.50783e-12	1.4263e-13	4.21277e-13	0	0	0	0	0	0	0	0	0	0	0	0	0	0	0	0	0	0	0	0	0
1248.41	36	3	1	0	0	0	0	0	0	0	0	0	0	0	0	0	0	0	0	0	0	0	0	0		2.26174e-12	4.27889e-13	4.21277e-13	0	0	0	0	0	0	0	0	0	0	0	0	0	0	0	0	0	0	0	0	0
1249.81	35	0	0	0	0	0	1	1	0	0	0	0	0	0	0	0	0	0	0	0	0	0	0	0		2.19892e-12	0	0	0	0	0	1.78287e-11	3.9564e-11	0	0	0	0	0	0	0	0	0	0	0	0	0	0	0	0
1251.21	36	1	0	0	0	0	0	1	0	0	0	0	0	0	0	0	0	0	0	0	0	0	0	0		2.26174e-12	1.4263e-13	0	0	0	0	0	3.9564e-11	0	0	0	0	0	0	0	0	0	0	0	0	0	0	0	0
1252.61	38	1	2	0	1	0	0	0	0	0	0	0	0	0	0	0	0	0	0	0	0	0	0	0		2.38739e-12	1.4263e-13	8.42555e-13	0	3.21934e-12	0	0	0	0	0	0	0	0	0	0	0	0	0	0	0	0	0	0	0
1254.01	45	2	1	0	0	0	0	0	0	0	0	0	0	0	0	0	0	0	0	0	0	0	0	0		2.82718e-12	2.85259e-13	4.21277e-13	0	0	0	0	0	0	0	0	0	0	0	0	0	0	0	0	0	0	0	0	0
1255.4	31	1	0	1	0	1	0	0	0	0	0	0	0	0	0	0	0	0	0	0	0	0	0	0		1.94761e-12	1.4263e-13	0	1.46533e-12	0	7.19918e-12	0	0	0	0	0	0	0	0	0	0	0	0	0	0	0	0	0	0
1256.8	43	2	1	0	0	0	1	0	0	0	0	0	0	0	0	0	0	0	0	0	0	0	0	0		2.70153e-12	2.85259e-13	4.21277e-13	0	0	0	1.78287e-11	0	0	0	0	0	0	0	0	0	0	0	0	0	0	0	0	0
1258.2	28	1	1	1	2	0	0	0	0	0	0	0	0	0	0	0	0	0	0	0	0	0	0	0		1.75913e-12	1.4263e-13	4.21277e-13	1.46533e-12	6.43867e-12	0	0	0	0	0	0	0	0	0	0	0	0	0	0	0	0	0	0	0
1259.6	34	2	3	0	0	0	0	0	0	0	0	0	0	0	0	0	0	0	0	0	0	0	0	0		2.13609e-12	2.85259e-13	1.26383e-12	0	0	0	0	0	0	0	0	0	0	0	0	0	0	0	0	0	0	0	0	0
1261	37	1	1	0	0	0	0	0	0	0	0	0	0	0	0	0	0	0	0	0	0	0	0	0		2.32457e-12	1.4263e-13	4.21277e-13	0	0	0	0	0	0	0	0	0	0	0	0	0	0	0	0	0	0	0	0	0
1262.39	38	6	0	0	1	0	0	0	0	0	0	0	0	0	0	0	0	0	0	0	0	0	0	0		2.38739e-12	8.55778e-13	0	0	3.21934e-12	0	0	0	0	0	0	0	0	0	0	0	0	0	0	0	0	0	0	0
1263.79	27	2	2	0	0	0	1	0	0	0	0	0	0	0	0	0	0	0	0	0	0	0	0	0		1.69631e-12	2.85259e-13	8.42555e-13	0	0	0	1.78287e-11	0	0	0	0	0	0	0	0	0	0	0	0	0	0	0	0	0
1265.19	46	4	0	0	1	0	0	0	0	0	0	0	0	0	0	0	0	0	0	0	0	0	0	0		2.89e-12	5.70519e-13	0	0	3.21934e-12	0	0	0	0	0	0	0	0	0	0	0	0	0	0	0	0	0	0	0
1266.59	25	5	0	0	0	0	0	0	0	0	0	0	0	0	0	0	0	0	0	0	0	0	0	0		1.57065e-12	7.13148e-13	0	0	0	0	0	0	0	0	0	0	0	0	0	0	0	0	0	0	0	0	0	0
1267.99	36	2	1	0	0	0	0	0	0	0	0	0	0	0	0	0	0	0	0	0	0	0	0	0		2.26174e-12	2.85259e-13	4.21277e-13	0	0	0	0	0	0	0	0	0	0	0	0	0	0	0	0	0	0	0	0	0
1269.38	31	1	0	0	1	0	0	0	0	0	0	0	0	0	0	0	0	0	0	0	0	0	0	0		1.94761e-12	1.4263e-13	0	0	3.21934e-12	0	0	0	0	0	0	0	0	0	0	0	0	0	0	0	0	0	0	0
1270.78	34	4	0	1	0	2	0	0	0	0	1	0	0	0	0	0	0	0	0	0	0	0	0	0		2.13609e-12	5.70519e-13	0	1.46533e-12	0	1.43984e-11	0	0	0	0	4.02417e-10	0	0	0	0	0	0	0	0	0	0	0	0	0
1272.18	35	2	0	0	2	0	0	0	0	0	0	0	0	0	0	0	0	0	0	0	0	0	0	0		2.19892e-12	2.85259e-13	0	0	6.43867e-12	0	0	0	0	0	0	0	0	0	0	0	0	0	0	0	0	0	0	0
1273.58	33	4	0	0	0	1	0	0	0	0	0	0	0	0	0	0	0	0	0	0	0	0	0	0		2.07326e-12	5.70519e-13	0	0	0	7.19918e-12	0	0	0	0	0	0	0	0	0	0	0	0	0	0	0	0	0	0
1274.98	33	4	1	0	0	0	1	1	0	0	0	0	0	0	0	0	0	0	0	0	0	0	0	0		2.07326e-12	5.70519e-13	4.21277e-13	0	0	0	1.78287e-11	3.9564e-11	0	0	0	0	0	0	0	0	0	0	0	0	0	0	0	0
1276.37	31	4	1	1	0	0	0	1	0	0	0	0	0	0	0	0	0	0	0	0	0	0	0	0		1.94761e-12	5.70519e-13	4.21277e-13	1.46533e-12	0	0	0	3.9564e-11	0	0	0	0	0	0	0	0	0	0	0	0	0	0	0	0
1277.77	23	1	0	1	1	1	0	0	0	0	0	0	0	0	0	0	0	0	0	0	0	0	0	0		1.445e-12	1.4263e-13	0	1.46533e-12	3.21934e-12	7.19918e-12	0	0	0	0	0	0	0	0	0	0	0	0	0	0	0	0	0	0
1279.17	38	1	0	0	0	0	0	0	0	0	0	0	0	0	0	0	0	0	0	0	0	0	0	0		2.38739e-12	1.4263e-13	0	0	0	0	0	0	0	0	0	0	0	0	0	0	0	0	0	0	0	0	0	0
1280.57	20	3	2	0	0	0	0	0	0	0	0	0	0	0	0	0	0	0	0	0	0	0	0	0		1.25652e-12	4.27889e-13	8.42555e-13	0	0	0	0	0	0	0	0	0	0	0	0	0	0	0	0	0	0	0	0	0
1281.97	33	4	1	2	2	0	0	0	0	0	0	0	0	0	0	0	0	0	0	0	0	0	0	0		2.07326e-12	5.70519e-13	4.21277e-13	2.93067e-12	6.43867e-12	0	0	0	0	0	0	0	0	0	0	0	0	0	0	0	0	0	0	0
1283.36	28	4	0	0	1	0	0	0	0	0	0	1	0	0	0	0	0	0	0	0	0	0	0	0		1.75913e-12	5.70519e-13	0	0	3.21934e-12	0	0	0	0	0	0	7.50251e-10	0	0	0	0	0	0	0	0	0	0	0	0
1284.76	42	3	3	2	0	0	0	0	0	0	0	0	0	0	0	0	0	0	0	0	0	0	0	0		2.6387e-12	4.27889e-13	1.26383e-12	2.93067e-12	0	0	0	0	0	0	0	0	0	0	0	0	0	0	0	0	0	0	0	0
1286.16	32	4	3	0	1	0	1	0	0	0	0	0	0	0	0	0	0	0	0	0	0	0	0	0		2.01044e-12	5.70519e-13	1.26383e-12	0	3.21934e-12	0	1.78287e-11	0	0	0	0	0	0	0	0	0	0	0	0	0	0	0	0	0
1287.56	31	4	3	0	0	1	0	0	0	0	0	0	0	0	0	0	0	0	0	0	0	0	0	0		1.94761e-12	5.70519e-13	1.26383e-12	0	0	7.19918e-12	0	0	0	0	0	0	0	0	0	0	0	0	0	0	0	0	0	0
1288.96	32	2	0	1	0	0	0	0	1	0	0	0	0	0	0	0	0	0	0	0	0	0	0	0		2.01044e-12	2.85259e-13	0	1.46533e-12	0	0	0	0	9.37813e-11	0	0	0	0	0	0	0	0	0	0	0	0	0	0	0
1290.35	24	1	0	0	0	0	0	0	0	0	0	0	0	0	0	0	0	0	0	0	0	0	0	0		1.50783e-12	1.4263e-13	0	0	0	0	0	0	0	0	0	0	0	0	0	0	0	0	0	0	0	0	0	0
1291.75	40	5	0	0	0	0	0	0	0	0	0	0	0	0	0	0	0	0	0	0	0	0	0	0		2.51305e-12	7.13148e-13	0	0	0	0	0	0	0	0	0	0	0	0	0	0	0	0	0	0	0	0	0	0
1293.15	43	3	1	0	1	0	0	0	0	0	0	0	0	0	0	0	0	0	0	0	0	0	0	0		2.70153e-12	4.27889e-13	4.21277e-13	0	3.21934e-12	0	0	0	0	0	0	0	0	0	0	0	0	0	0	0	0	0	0	0
1294.55	47	1	0	0	0	1	0	1	0	0	0	0	0	0	0	0	0	0	0	0	0	0	0	0		2.95283e-12	1.4263e-13	0	0	0	7.19918e-12	0	3.9564e-11	0	0	0	0	0	0	0	0	0	0	0	0	0	0	0	0
1295.95	16	0	0	0	0	0	0	0	0	0	0	0	0	0	0	0	0	0	0	0	0	0	0	0		1.00522e-12	0	0	0	0	0	0	0	0	0	0	0	0	0	0	0	0	0	0	0	0	0	0	0
1297.34	41	3	2	0	1	0	0	0	0	0	0	0	0	0	0	0	0	0	0	0	0	0	0	0		2.57587e-12	4.27889e-13	8.42555e-13	0	3.21934e-12	0	0	0	0	0	0	0	0	0	0	0	0	0	0	0	0	0	0	0
1298.74	35	3	1	0	0	0	0	0	0	0	0	0	0	0	0	0	0	0	0	0	0	0	0	0		2.19892e-12	4.27889e-13	4.21277e-13	0	0	0	0	0	0	0	0	0	0	0	0	0	0	0	0	0	0	0	0	0
1300.14	39	4	2	0	0	2	1	0	0	0	0	0	0	0	0	0	0	0	0	0	0	0	0	0		2.45022e-12	5.70519e-13	8.42555e-13	0	0	1.43984e-11	1.78287e-11	0	0	0	0	0	0	0	0	0	0	0	0	0	0	0	0	0
1301.54	49	6	0	0	0	0	0	0	0	0	0	0	0	0	0	0	0	0	0	0	0	0	0	0		3.07848e-12	8.55778e-13	0	0	0	0	0	0	0	0	0	0	0	0	0	0	0	0	0	0	0	0	0	0
1302.94	43	2	1	0	0	0	0	0	0	0	0	0	0	0	0	0	0	0	0	0	0	0	0	0		2.70153e-12	2.85259e-13	4.21277e-13	0	0	0	0	0	0	0	0	0	0	0	0	0	0	0	0	0	0	0	0	0
1304.33	23	1	0	0	1	0	0	0	0	0	0	0	0	0	0	0	0	0	0	0	0	0	0	0		1.445e-12	1.4263e-13	0	0	3.21934e-12	0	0	0	0	0	0	0	0	0	0	0	0	0	0	0	0	0	0	0
1305.73	38	1	0	0	2	0	1	0	0	0	0	0	0	0	0	0	0	0	0	0	0	0	0	0		2.38739e-12	1.4263e-13	0	0	6.43867e-12	0	1.78287e-11	0	0	0	0	0	0	0	0	0	0	0	0	0	0	0	0	0
1307.13	44	3	1	1	0	0	0	0	0	0	0	0	0	0	0	0	0	0	0	0	0	0	0	0		2.76435e-12	4.27889e-13	4.21277e-13	1.46533e-12	0	0	0	0	0	0	0	0	0	0	0	0	0	0	0	0	0	0	0	0
1308.53	34	3	0	1	0	0	0	0	0	0	0	0	0	0	0	0	0	0	0	0	0	0	0	0		2.13609e-12	4.27889e-13	0	1.46533e-12	0	0	0	0	0	0	0	0	0	0	0	0	0	0	0	0	0	0	0	0
1309.93	39	3	0	0	0	0	0	0	0	0	0	0	0	0	0	0	0	0	0	0	0	0	0	0		2.45022e-12	4.27889e-13	0	0	0	0	0	0	0	0	0	0	0	0	0	0	0	0	0	0	0	0	0	0
1311.32	25	1	0	1	0	0	0	0	0	0	0	0	0	0	0	0	0	0	0	0	0	0	0	0		1.57065e-12	1.4263e-13	0	1.46533e-12	0	0	0	0	0	0	0	0	0	0	0	0	0	0	0	0	0	0	0	0
1312.72	33	3	0	0	1	0	0	0	0	0	0	0	0	0	0	0	0	0	0	0	0	0	0	0		2.07326e-12	4.27889e-13	0	0	3.21934e-12	0	0	0	0	0	0	0	0	0	0	0	0	0	0	0	0	0	0	0
1314.12	32	2	0	0	1	1	0	0	0	0	0	0	0	0	0	0	0	0	0	0	0	0	0	0		2.01044e-12	2.85259e-13	0	0	3.21934e-12	7.19918e-12	0	0	0	0	0	0	0	0	0	0	0	0	0	0	0	0	0	0
1315.52	33	3	1	0	2	1	0	0	0	0	0	0	0	0	0	0	0	0	0	0	0	0	0	0		2.07326e-12	4.27889e-13	4.21277e-13	0	6.43867e-12	7.19918e-12	0	0	0	0	0	0	0	0	0	0	0	0	0	0	0	0	0	0
1316.92	42	3	0	1	1	2	0	0	0	0	0	0	0	0	0	0	0	0	0	0	0	0	0	0		2.6387e-12	4.27889e-13	0	1.46533e-12	3.21934e-12	1.43984e-11	0	0	0	0	0	0	0	0	0	0	0	0	0	0	0	0	0	0
1318.31	37	3	1	0	1	1	0	0	0	0	0	0	0	0	0	0	0	0	0	0	0	0	0	0		2.32457e-12	4.27889e-13	4.21277e-13	0	3.21934e-12	7.19918e-12	0	0	0	0	0	0	0	0	0	0	0	0	0	0	0	0	0	0
1319.71	13	0	0	0	0	0	0	0	0	0	0	0	0	0	0	0	0	0	0	0	0	0	0	0		8.1674e-13	0	0	0	0	0	0	0	0	0	0	0	0	0	0	0	0	0	0	0	0	0	0	0
1321.11	28	1	2	0	1	0	0	0	0	0	0	0	0	0	0	0	0	0	0	0	0	0	0	0		1.75913e-12	1.4263e-13	8.42555e-13	0	3.21934e-12	0	0	0	0	0	0	0	0	0	0	0	0	0	0	0	0	0	0	0
1322.51	38	4	2	1	1	1	0	0	0	0	0	0	0	0	0	0	0	0	0	0	0	0	0	0		2.38739e-12	5.70519e-13	8.42555e-13	1.46533e-12	3.21934e-12	7.19918e-12	0	0	0	0	0	0	0	0	0	0	0	0	0	0	0	0	0	0
1323.91	46	3	1	0	0	0	0	1	0	0	0	0	0	0	0	0	0	0	0	0	0	0	0	0		2.89e-12	4.27889e-13	4.21277e-13	0	0	0	0	3.9564e-11	0	0	0	0	0	0	0	0	0	0	0	0	0	0	0	0
1325.3	21	0	3	0	0	1	0	0	0	0	0	0	0	0	0	0	0	0	0	0	0	0	0	0		1.31935e-12	0	1.26383e-12	0	0	7.19918e-12	0	0	0	0	0	0	0	0	0	0	0	0	0	0	0	0	0	0
1326.7	19	1	1	1	0	0	0	0	0	0	0	0	0	0	0	0	0	0	0	0	0	0	0	0		1.1937e-12	1.4263e-13	4.21277e-13	1.46533e-12	0	0	0	0	0	0	0	0	0	0	0	0	0	0	0	0	0	0	0	0
1328.1	30	1	0	1	0	0	0	0	0	0	0	0	0	0	0	0	0	0	0	0	0	0	0	0		1.88478e-12	1.4263e-13	0	1.46533e-12	0	0	0	0	0	0	0	0	0	0	0	0	0	0	0	0	0	0	0	0
1329.5	39	4	1	0	0	1	0	0	0	0	0	0	0	0	0	0	0	0	0	0	0	0	0	0		2.45022e-12	5.70519e-13	4.21277e-13	0	0	7.19918e-12	0	0	0	0	0	0	0	0	0	0	0	0	0	0	0	0	0	0
1330.9	20	0	0	0	0	0	0	0	0	0	0	0	0	0	0	0	0	0	0	0	0	0	0	0		1.25652e-12	0	0	0	0	0	0	0	0	0	0	0	0	0	0	0	0	0	0	0	0	0	0	0
1332.29	50	5	1	1	0	0	0	0	0	0	0	0	0	0	0	0	0	0	0	0	0	0	0	0		3.14131e-12	7.13148e-13	4.21277e-13	1.46533e-12	0	0	0	0	0	0	0	0	0	0	0	0	0	0	0	0	0	0	0	0
1333.69	39	3	1	0	0	0	0	0	0	0	0	0	0	0	0	0	0	0	0	0	0	0	0	0		2.45022e-12	4.27889e-13	4.21277e-13	0	0	0	0	0	0	0	0	0	0	0	0	0	0	0	0	0	0	0	0	0
1335.09	43	2	0	0	3	0	0	0	0	0	0	0	0	0	0	0	0	0	0	0	0	0	0	0		2.70153e-12	2.85259e-13	0	0	9.65801e-12	0	0	0	0	0	0	0	0	0	0	0	0	0	0	0	0	0	0	0
1336.49	32	5	3	0	0	1	0	0	0	0	0	0	0	0	0	0	0	0	0	0	0	0	0	0		2.01044e-12	7.13148e-13	1.26383e-12	0	0	7.19918e-12	0	0	0	0	0	0	0	0	0	0	0	0	0	0	0	0	0	0
1337.89	29	3	4	0	0	0	1	1	0	0	0	0	0	0	0	0	0	0	0	0	0	0	0	0		1.82196e-12	4.27889e-13	1.68511e-12	0	0	0	1.78287e-11	3.9564e-11	0	0	0	0	0	0	0	0	0	0	0	0	0	0	0	0
1339.28	45	4	1	1	0	0	0	0	0	0	0	0	0	0	0	0	0	0	0	0	0	0	0	0		2.82718e-12	5.70519e-13	4.21277e-13	1.46533e-12	0	0	0	0	0	0	0	0	0	0	0	0	0	0	0	0	0	0	0	0
1340.68	6	0	1	0	0	0	0	0	0	0	0	0	0	0	0	0	0	0	0	0	0	0	0	0		3.76957e-13	0	4.21277e-13	0	0	0	0	0	0	0	0	0	0	0	0	0	0	0	0	0	0	0	0	0
1342.08	34	1	2	0	0	0	0	0	0	0	0	0	0	0	0	0	0	0	0	0	0	0	0	0		2.13609e-12	1.4263e-13	8.42555e-13	0	0	0	0	0	0	0	0	0	0	0	0	0	0	0	0	0	0	0	0	0
1343.48	30	1	0	0	0	0	0	0	0	0	0	0	0	0	0	0	0	0	0	0	0	0	0	0		1.88478e-12	1.4263e-13	0	0	0	0	0	0	0	0	0	0	0	0	0	0	0	0	0	0	0	0	0	0
1344.88	19	1	1	0	0	1	0	0	0	0	0	0	0	0	0	0	0	0	0	0	0	0	0	0		1.1937e-12	1.4263e-13	4.21277e-13	0	0	7.19918e-12	0	0	0	0	0	0	0	0	0	0	0	0	0	0	0	0	0	0
1346.27	27	2	0	0	3	0	0	0	0	0	0	0	0	0	0	0	0	0	0	0	0	0	0	0		1.69631e-12	2.85259e-13	0	0	9.65801e-12	0	0	0	0	0	0	0	0	0	0	0	0	0	0	0	0	0	0	0
1347.67	23	0	2	0	0	0	0	0	0	0	0	0	0	0	0	0	0	0	0	0	0	0	0	0		1.445e-12	0	8.42555e-13	0	0	0	0	0	0	0	0	0	0	0	0	0	0	0	0	0	0	0	0	0
1349.07	27	0	0	1	0	1	0	0	0	0	0	0	0	0	0	0	0	0	0	0	0	0	0	0		1.69631e-12	0	0	1.46533e-12	0	7.19918e-12	0	0	0	0	0	0	0	0	0	0	0	0	0	0	0	0	0	0
1350.47	14	1	0	1	0	0	0	0	0	0	0	0	0	0	0	0	0	0	0	0	0	0	0	0		8.79566e-13	1.4263e-13	0	1.46533e-12	0	0	0	0	0	0	0	0	0	0	0	0	0	0	0	0	0	0	0	0
1351.87	9	2	0	0	0	0	0	0	0	0	0	0	0	0	0	0	0	0	0	0	0	0	0	0		5.65435e-13	2.85259e-13	0	0	0	0	0	0	0	0	0	0	0	0	0	0	0	0	0	0	0	0	0	0
1353.26	18	1	3	0	0	0	0	0	0	0	0	0	0	0	0	0	0	0	0	0	0	0	0	0		1.13087e-12	1.4263e-13	1.26383e-12	0	0	0	0	0	0	0	0	0	0	0	0	0	0	0	0	0	0	0	0	0
1354.66	14	0	1	1	1	0	0	0	0	0	0	0	0	0	0	0	0	0	0	0	0	0	0	0		8.79566e-13	0	4.21277e-13	1.46533e-12	3.21934e-12	0	0	0	0	0	0	0	0	0	0	0	0	0	0	0	0	0	0	0
1356.06	12	3	1	0	0	0	0	0	0	0	0	0	0	0	0	0	0	0	0	0	0	0	0	0		7.53914e-13	4.27889e-13	4.21277e-13	0	0	0	0	0	0	0	0	0	0	0	0	0	0	0	0	0	0	0	0	0
1357.46	28	2	3	0	1	0	0	0	0	0	0	0	0	0	0	0	0	0	0	0	0	0	0	0		1.75913e-12	2.85259e-13	1.26383e-12	0	3.21934e-12	0	0	0	0	0	0	0	0	0	0	0	0	0	0	0	0	0	0	0
1358.86	32	1	1	0	2	0	0	0	0	0	0	0	0	0	0	0	0	0	0	0	0	0	0	0		2.01044e-12	1.4263e-13	4.21277e-13	0	6.43867e-12	0	0	0	0	0	0	0	0	0	0	0	0	0	0	0	0	0	0	0
1360.25	20	2	4	0	2	1	0	1	0	0	0	0	0	0	0	0	0	0	0	0	0	0	0	0		1.25652e-12	2.85259e-13	1.68511e-12	0	6.43867e-12	7.19918e-12	0	3.9564e-11	0	0	0	0	0	0	0	0	0	0	0	0	0	0	0	0
1361.65	22	3	4	0	0	0	0	0	0	0	0	0	0	0	0	0	0	0	0	0	0	0	0	0		1.38218e-12	4.27889e-13	1.68511e-12	0	0	0	0	0	0	0	0	0	0	0	0	0	0	0	0	0	0	0	0	0
1363.05	20	1	0	0	1	1	1	0	0	0	0	0	0	0	0	0	0	0	0	0	0	0	0	0		1.25652e-12	1.4263e-13	0	0	3.21934e-12	7.19918e-12	1.78287e-11	0	0	0	0	0	0	0	0	0	0	0	0	0	0	0	0	0
1364.45	13	2	2	0	0	0	0	0	0	0	0	0	0	0	0	0	0	0	0	0	0	0	0	0		8.1674e-13	2.85259e-13	8.42555e-13	0	0	0	0	0	0	0	0	0	0	0	0	0	0	0	0	0	0	0	0	0
1365.85	32	1	1	0	0	0	0	0	0	0	0	0	0	0	0	0	0	0	0	0	0	0	0	0		2.01044e-12	1.4263e-13	4.21277e-13	0	0	0	0	0	0	0	0	0	0	0	0	0	0	0	0	0	0	0	0	0
1367.24	22	3	2	1	0	0	1	0	0	0	1	0	0	0	0	0	0	0	0	0	0	0	0	0		1.38218e-12	4.27889e-13	8.42555e-13	1.46533e-12	0	0	1.78287e-11	0	0	0	4.02417e-10	0	0	0	0	0	0	0	0	0	0	0	0	0
1368.64	16	4	0	2	1	1	0	0	0	0	0	0	0	0	0	0	0	0	0	0	0	0	0	0		1.00522e-12	5.70519e-13	0	2.93067e-12	3.21934e-12	7.19918e-12	0	0	0	0	0	0	0	0	0	0	0	0	0	0	0	0	0	0
1370.04	18	1	0	0	2	0	0	0	0	0	0	0	0	0	0	0	0	0	0	0	0	0	0	0		1.13087e-12	1.4263e-13	0	0	6.43867e-12	0	0	0	0	0	0	0	0	0	0	0	0	0	0	0	0	0	0	0
1371.44	21	0	2	0	1	1	0	0	0	0	0	0	0	0	0	0	0	0	0	0	0	0	0	0		1.31935e-12	0	8.42555e-13	0	3.21934e-12	7.19918e-12	0	0	0	0	0	0	0	0	0	0	0	0	0	0	0	0	0	0
1372.84	35	1	0	0	0	1	0	0	0	0	0	0	0	0	0	0	0	0	0	0	0	0	0	0		2.19892e-12	1.4263e-13	0	0	0	7.19918e-12	0	0	0	0	0	0	0	0	0	0	0	0	0	0	0	0	0	0
1374.23	25	3	4	0	1	0	0	0	0	0	0	0	0	0	0	0	0	0	0	0	0	0	0	0		1.57065e-12	4.27889e-13	1.68511e-12	0	3.21934e-12	0	0	0	0	0	0	0	0	0	0	0	0	0	0	0	0	0	0	0
1375.63	23	1	0	0	0	0	0	0	0	0	0	0	0	0	0	0	0	0	0	0	0	0	0	0		1.445e-12	1.4263e-13	0	0	0	0	0	0	0	0	0	0	0	0	0	0	0	0	0	0	0	0	0	0
1377.03	23	3	0	0	2	0	1	0	0	0	0	0	0	0	0	0	0	0	0	0	0	0	0	0		1.445e-12	4.27889e-13	0	0	6.43867e-12	0	1.78287e-11	0	0	0	0	0	0	0	0	0	0	0	0	0	0	0	0	0
1378.43	23	3	2	0	0	0	0	0	0	0	0	0	0	0	0	0	0	0	0	0	0	0	0	0		1.445e-12	4.27889e-13	8.42555e-13	0	0	0	0	0	0	0	0	0	0	0	0	0	0	0	0	0	0	0	0	0
1379.83	1	0	0	1	1	0	0	0	0	0	0	0	0	0	0	0	0	0	0	0	0	0	0	0		6.28262e-14	0	0	1.46533e-12	3.21934e-12	0	0	0	0	0	0	0	0	0	0	0	0	0	0	0	0	0	0	0
1381.22	2	0	0	0	0	0	0	0	0	0	0	0	0	0	0	0	0	0	0	0	0	0	0	0		1.25652e-13	0	0	0	0	0	0	0	0	0	0	0	0	0	0	0	0	0	0	0	0	0	0	0
